# Supplementary material for: An R2R3-MYB Transcription Factor RmMYB108 Responds to Chilling Stress of Rosa multiflora and Conferred Cold Tolerance of Arabidopsis
Source: Front Plant Sci. 2021 Jul 27;12:696919. doi: 10.3389/fpls.2021.696919 (PMC8353178; doi:10.3389/fpls.2021.696919)
Supplement: Supplementary Table 1 — The primers names and sequences (5′–3′) for quantitative real-time polymerase chain reaction (qRT-PCR), reverse-transcriptase polymerase chain reaction (RT-PCR), cloning, overexpression, subcellular localization, and self-activation. [file Table_1.XLSX]

## Sheet: Sheet3
Forward primer name	Forward primer sequence (5'-3')	Reverse primer name	Reverse primer sequence (5'-3')	Purpose
MYB5-qF	GAAACAGGTGGTCCCTCATAGC	MYB5-qR	GAGCCTTACTTTGATTGCGTG	qRT-PCR
MYB35-qF	TGGAGGGCTGTTCCTACCAATAC	MYB35-qR	TGGTCAGTGAAGTTCCCACGTTT	qRT-PCR
MYB44b-qF	CGGGTACAACAGTGTCGGGTCT	MYB44b-qR	AAGGCTTGCGAGGGAGGAAT	qRT-PCR
MYB33-qF	CGATGGGCAAATCACCTAAG	MYB33-qR	ATACAGTGGCAAGCCAGCTC	qRT-PCR
MYB308c-qF	TCACGGCGAAGGCTGCTG	MYB308c-qR	CATTTGTTCCCGAGGAGGCTAT	qRT-PCR
MYB308d-qF	AAGACGACCAATAAAGGAGCAT	MYB308d-qR	CATCTTCACCAAAGTTGCCAC	qRT-PCR
MYB4b-qF	GGCTTGTTGAGATGTGGGAAAA	MYB4b-qR	TGCGATTGCTGACCATCTGTTA	qRT-PCR
MYB30c-qF	ATGTTCCAAGACGAAAGCAAGC	MYB30c-qR	ATCAAAGAGCCACTTCTCCAGC	qRT-PCR
MYB44a-qF	TCTGCTGACTCTGTCGTTACCTG	MYB44a-qR	CTAACCTCCTTCCTAATCATCTCCT	qRT-PCR
DIVa-qF	GAGTTGCCGAGTTACGCTGAT	DIVa-qR	TGCCAAATTGCTTTAGTCCTACC	qRT-PCR
SRM1-qF	GTTGTATTCCACTGCCTTGC	SRM1-qR	GATTCGCTGCTGTAGTGTCC	qRT-PCR
MYB114b-qF	TCTTTGATTGCTGGACGACT	MYB114b-qR	GTCTTTGTTATTTCTGGATGCTTAT	qRT-PCR
MYB106-qF	TTATTGGGTAACAAATGGGC	MYB106-qR	GAGTCTGATATAGATGATCCCAA	qRT-PCR
MYB108-qF	GAAGACGAAGATGCTATGATGATGG	MYB108-qR	TCGGGTCGGAGATAGTTGAGCC	qRT-PCR
MYB24b-qF	ACTCCAAGTGGGGAAATAGG	MYB24b-qR	CTGAAACTCTGTGCTGTCGG	qRT-PCR
UBC-F	GCCAGAGATTGCCCATATGTA	UBC-R	TCACAGAGTCCTAGCAGCACA	qRT-PCR
MYB108-F1	ATGGATGTCAAACCAGGAAGGG	MYB108-R1	TCAAATATTGCCGAGTTGCTGC	Cloning
MYB108-F2	TGCTCTAGAATGGATGTCAAACCAGG	MYB108-R2	CGAGCTCATATTGCCGAGTTGCTG	Overexpression
MYB108-F3	GAGAACACGGGGGACTCTAGAATGGATGTCAAACCAGGAAG	MYB108-R3	GAGAACACGGGGGACTCTAGAATGGATGTCAAACCAGGAAG	Subcellular localization
AtCOR47-F	CAGTGTCGGAGAGTGTGGTG	AtCOR47-R	ACAGCTGGTGAATCCTCTGC	qRT-PCR
AtICE1-F	TCTTGTCTGCTCGGTCAC	AtICE1-R	AATCCCAGTCTCATCCATA	qRT-PCR
AtCBF3-F	CCGCTTTAGCCCTTCGT	AtCBF3-R	TCCGTCGTCGCATCACA	qRT-PCR
AtCOR15B-F	GCAAAGCAGAGTGGTGTTGG	AtCOR15B-R	GGCCTCCTTCGTCTTATCCG	qRT-PCR
AtRD29A-F	CTCCATCAAGAAGCCATGAATTT	AtRD29A-R	CAACCATTCCTCCTCCTCCTT	qRT-PCR
AtActin2-qF (At3g18780)	GGTAACATTGTGCTCAGTGGTGG	AtActin2-qR	AACGACCTTAATCTTCATGCTGC	qRT-PCR
AtActin1-F (AT2G37620)	GAAAATGGCTGATGGTGAAG	AtActin1-R	CTCATAGATAGGAACAGTGTGGC	RT-PCR
MYB108-F4	CGGGATCCCGATGGATGTCAAACCAGGAG	MYB108-R4	GCGTCGACGTCAAATATTGCCGAGTTGCTG	Self-activation
