# Supplementary material for: An R2R3-MYB Transcription Factor RmMYB108 Responds to Chilling Stress of Rosa multiflora and Conferred Cold Tolerance of Arabidopsis
Source: Front Plant Sci. 2021 Jul 27;12:696919. doi: 10.3389/fpls.2021.696919 (PMC8353178; doi:10.3389/fpls.2021.696919)
Supplement: Supplementary Table 2 — The name, raw fragments and fragments per kilobase per million (FPKM) of R2R3-MYBs that respond to low temperature from transcriptome sequencing of Rosa multiflora. [file Table_2.XLSX]

## Sheet: Sheet1
gene number in RNA-Seq (PRJNA698412 in SRA)	gene name	geneLength	CK_rawfragments	CK_FPKM	CT1_rawfragments	CT1_FPKM	CT2_rawfragments	CT2_FPKM
CL1869.Contig1_All	RmMYB5	1140	140	6.095	30	1.4396	1	0.0494
CL1883.Contig1_All	RmMYB30	1900	8	0.209	3	0.0864	0	0
CL1883.Contig2_All	RmMYB30a	2068	18	0.432	24	0.6349	6	0.1634
CL2143.Contig1_All	RmMYB106	1228	134	5.4157	182	8.1077	93	4.2643
CL2273.Contig1_All	RmWERc	872	755	42.9714	64	4.015	0	0
CL2273.Contig2_All	RmMYB6a	1097	175	7.9174	45	2.244	5	0.2566
CL2850.Contig2_All	RmMYB44b	1676	1041	30.8266	14154	461.988	17800	598.007
CL5812.Contig1_All	RmDIVa	2033	181	4.4187	1532	41.2237	2105	58.3008
CL6007.Contig1_All	RmMYB5a	1844	47	1.265	65	1.9283	46	1.4046
CL89.Contig1_All	RmMYB124	2350	6	0.1267	3	0.0698	0	0
CL89.Contig2_All	RmMYB124a	2403	41	0.8468	26	0.5919	13	0.3046
Unigene10685_All	RmMYB114a	2011	2193	54.1223	1593	43.334	234	6.5518
Unigene1249_All	RmSRM1	1744	425	12.0946	479	15.025	438	14.1412
Unigene13042_All	RmWERe	1229	256	10.338	162	7.2109	79	3.6194
Unigene1352_All	RmMYB24a	1415	910	31.9179	502	19.4076	495	19.6974
Unigene1381_All	RmMYB6b	1368	1925	69.8383	376	15.0358	240	9.8784
Unigene14368_All	RmMYB14	1353	149	5.4656	363	14.6769	198	8.24
Unigene15270_All	RmMYB308c	1234	116	4.6654	32	1.4186	11	0.5019
Unigene1536_All	RmMYB3	1071	146	6.7657	71	3.6266	237	12.46
Unigene16448_All	RmMYB108	1165	19	0.8094	170	7.9827	446	21.556
Unigene16835_All	RmMYB24b	1192	48	1.9985	237	10.8767	241	11.3842
Unigene17803_All	RmMYB33	2399	325	6.7236	197	4.4922	109	2.5583
Unigene17867_All	RmMYB35	1529	203	6.5893	353	12.6297	99	3.6458
Unigene18902_All	RmDIVd	1973	565	14.2125	1800	49.9081	3868	110.387
Unigene19674_All	RmMYB308d	812	317	19.3755	31	2.0885	2	0.1387
Unigene20751_All	RmMYB30c	1353	366	13.4256	144	5.8222	21	0.8739
Unigene20760_All	RmMYB6	1217	121	4.9345	85	3.8208	23	1.0641
Unigene20801_All	RmMYB8d	1183	392	16.4456	32	1.4798	3	0.1428
Unigene23194_All	RmTT2	1032	205	9.8588	34	1.8023	0	0
Unigene23230_All	RmMYB61	1742	161	4.587	68	2.1354	3	0.097
Unigene2825_All	RmMYB44a	1662	133	3.9716	2279	75.0134	2839	96.1821
Unigene2918_All	RmMYB20	1377	627	22.5987	807	32.0601	1255	51.318
Unigene34803_All	RmMYB308b	995	4	0.1995	11	0.6048	104	5.8853
Unigene5241_All	RmRAX2L	1348	58	2.1354	200	8.1164	68	2.8404
Unigene6726_All	RmMYB8e	1228	3829	154.752	973	43.3451	167	7.6573
Unigene7608_All	RmMYB114b	924	39	2.0948	42	2.4866	23	1.4016
Unigene3092_All	RmMYB4b	1102	3	0.1351	74	3.6735	232	11.854
