# Supplementary material for: An R2R3-MYB Transcription Factor RmMYB108 Responds to Chilling Stress of Rosa multiflora and Conferred Cold Tolerance of Arabidopsis
Source: Front Plant Sci. 2021 Jul 27;12:696919. doi: 10.3389/fpls.2021.696919 (PMC8353178; doi:10.3389/fpls.2021.696919)
Supplement: Supplementary Table 3 — The subgroups and sequences of 185 RmMYBs from the whole genome of Rosa multiflora. [file Table_3.XLSX]

## Sheet: Sheet1
No.	Subgroup	R.multiflora_ID	Nucleotide sequence	Amino acid sequence
1	1R	Rmu_ssc0000378.1_g000003.1 /fd	ATGGAAGGAGAAGATGGTGCTGCTTCTGATCATCTTCACCATCATCATGGTGTTTATGGGTTTCAAAACAATCACATACAAACTCCTCATCAGCATCACAACCAACTCTTCAGGCCTGGTCCTCCGTTGACAGCCATAGACAGGTTCCTGTGGTCTCAAAACAATGCAAAGAACAAAGACAGACTCGTCTCCTCAAATGGGTTTTCCTCATTTGGTGGTGCAATGGGTGATCTGCAGACTTGTTCGAATTGGCCGCCGAGTAGTCTCAGAGAGGCTAGCTTGGATGAACTGCTTTTTCTTGATCATGGTGAGGCCATGACTTGGCCTCCAGAGAAAATTCAAAACCCTAACATGGGGTTCAAAGAAGATCAAGTGAAGGTGGGTTCTAAAGGGGTGGGA…	MEGEDGAASDHLHHHHGVYGFQNNHIQTPHQHHNQLFRPGPPLTAIDRFLWSQNNAKNKDRLVSSNGFSSFGGAMGDLQTCSNWPPSSLREASLDELLFLDHGEAMTWPPEKIQNPNMGFKEDQVKVGSKGVGKKAKKGSSVPLIKGQWTDEEDRKLMRLVKQYGVRKWAQIAEKLVGRAGKQCRERWHNHLRPDIKVCS
2		Rmu_sc0000260.1_g000013.1 /fd	ATGGGTCGGTCCCGGGCAGTTGCGCAATCCGCTGTCGGCGATTCCAATCACAGTAGAGGTAAAAGAAAGAGAACAGCTTCAGGTGCAGAACTAGCTGAGAATAGTAGTACAGCTCAGAAAGGTTTAGCCCAGGAGCTTAGCGAACCCAAAGGGGCTTTTTACCATTGTAATTATTGCCAGAAAGATATATCTGGGAAGATACGTATAAAATGTGGGGTGTGTCCAGATTTTGATCTTTGCATTGAGTGCTTCTCTGTTGGAGTTGAGGTTACACCTCACAAATGTAATCATCCATATAGGGTTATGGACAATTTGTCTTTTCCACTAATATGTCCTGATTGGAATGCTGATGAAGAGATGCTATTGCTTGAGGGTATTGAAATGTATGGCTTTGGTAAT…	MGRSRAVAQSAVGDSNHSRGKRKRTASGAELAENSSTAQKGLAQELSEPKGAFYHCNYCQKDISGKIRIKCGVCPDFDLCIECFSVGVEVTPHKCNHPYRVMDNLSFPLICPDWNADEEMLLLEGIEMYGFGNWTEVSEHVGTRRRQQCIDHYNAIYLNSPCFPLPDMSHVMGKSREDLLALAKGSGQIKKELPMFMEITLKEVSPFSAGAKCEEPKKTAASKSSSHSTADGASGAGKKASNKLQIKDEPKVTKVEESQRSIGEKKLRSLVEEGPSVTELSGYNYKRQEFEIEYDNDAEQILADMEFLDTDTDRDRELKLRVLHVYGKRLDERKRRKDFVLERNLLHPDPLEKNLSPEVGEIYQRFKVFMQFHSNEDHKELLKSIIEEQQIVKRILDLQ…
3		Rmu_co8365561.1_g000001.1 /partial/fd	CTGAGGTGGGTGAATTATCTGAGGCCAGACCTTAAGAGGGGGCAGATAACTCCTCATGAAGAGAGCATAATTCTAGAGCTACATGCTAGGTGGGGGAACAGGTGGTCAACGATTGCAAGAAGCTTGCCTGGGAGGACTGATAATGAGATCAAGAACTACTGGAGGACCCATTTCAAGAAAAAGGCCAAAGTACCTTCTGATGCCTCTGAGAAGGCCAAAACTCGCCTCTTACGGCGGCAACAGTTTCATCATCAACAGCAGCAGCAGCAACAATTGCAGCTGATTAATCAAGCAGACATGAAAAGAATCATGGCCTTGCTGGATGAAAATGACACCAAAATATCGTCGTGGCCACCTCAAGCAGCCCAAGGTAAGCAGGACGTGGACACTAGTACTATA…	LRWVNYLRPDLKRGQITPHEESIILELHARWGNRWSTIARSLPGRTDNEIKNYWRTHFKKKAKVPSDASEKAKTRLLRRQQFHHQQQQQQQLQLINQADMKRIMALLDENDTKISSWPPQAAQGKQDVDTSTIAYPNHTITEEQGFFYSMLNGNVPQQVAEASSSEDSFLWDGLWNLDDVHVNFTTSSCATGKASTFHNFVVPFC
4		Rmu_sc0004132.1_g000020.1 /pd	ATGGGAAAATCTCCTTGTTGTGATGAACCTGGACTCAAGAAAGGGCCCTGGACTCCCGAAGAGGATGAAAAGCTTGTGCAGTACATCCAACAACACGGTCATGGAAGCTGGCGAGCTCTTCCCAAGCTTGCAGCAATTGCAACACATCTAGACGGACGAACTGACAATGAGATCAAGAATTTCTGGAATACTCATTTGAAGAAAAAACTGATCCAGATGGGGATTGATCCGATGACCCATCAACCCACAACTGACCTCTTCTCCAACCTCCAGGACCTTTTGCCGCTGCAATTTCAGACGTTGGATCAACTTGCTGCTACAACATTACATGATGCTGCAGAAGCTGTAGCTCAATTGGTCAAGCTTCAATACCTGCACCAGCAATATGTACTCGGCTCC…	MGKSPCCDEPGLKKGPWTPEEDEKLVQYIQQHGHGSWRALPKLAAIATHLDGRTDNEIKNFWNTHLKKKLIQMGIDPMTHQPTTDLFSNLQDLLPLQFQTLDQLAATTLHDAAEAVAQLVKLQYLHQQYVLGSNHISAAQPPSLTNEAEYVKRRNQSITWNHYMRMTNLDNSKMAKFKAKWKYCPQAYACNSKENGDDIDENSYDVPVKEVPNIYPS
5		Rmu_sc0014780.1_g000004.1 /pd	ATGGAAAAGCAATCTCATACTGTTGCATTTCCTGGAATAAGGAGAGGTGCATGGACTCCTGAGGAGGACAAGAAGCTCCTTGCTTTCGTTCAACAACATGGCCATGGAAGCTGGCGTTCCTTACCCCAGAAAGCTGCTGCTAATGGAGTTATACATGCATGTAGGTGGTCGACCATAGCTGCACAGTTACCAAAGAGAACAGACAATGAGATAAAGAACTACTGGAACACACATCTAAAGAAGAGGTTAGCCAAGATAGGGTTTGATCCTGTAACCCACAAGCCCAAGACCGCCATCCTCGCCTCTGCTGATGGTGGCGACCCGAAGAACCTCTCAAACCTCAGCCACATAGCTCAGTGGGAAACTGCTCGGCTTCAAGCAGAAGCTAGATTCTCCGGA…	MEKQSHTVAFPGIRRGAWTPEEDKKLLAFVQQHGHGSWRSLPQKAAANGVIHACRWSTIAAQLPKRTDNEIKNYWNTHLKKRLAKIGFDPVTHKPKTAILASADGGDPKNLSNLSHIAQWETARLQAEARFSGQSKLLISHDQPPRFGPVPVPQCLDMNERAREIRLLLKSILAADSGAQLGGGIGTTATHVGQEVGSFGKVDVEGLLTNCDQFEAPRTILGLRRQSSIEEVKEACDNVSSSW
6		Rmu_sc0008577.1_g000004.1 /pd	ATGTGGAGCGAAGAAGAGGATAAGATCCTGATCGAGGTGCACAAACAGATCGGAAACCGGTGGGCCGAGATCGCCAAGAGGCTTCCGGGGAGGACCGAGAATACTATCAAGAACCACTGGAACGCCACCATGAGGAAGCGATACCTCAAAAGAAAACTGACTACCAGTATCAATCGGAACATTAAGGACTCCTCCGCCAGCTACATTAATGAGAGCACTGTCCTGTCCAACTACATCAAGAGCGTGGTGAAATCCTCGGCCGCTGCTTCGGCCGAAAAGAAGAAGGGGAAGACTGCAGTGGTGTATGGTGAACAATCAAGTCTGCAAAATTTACCTGAGACCGACGTCTATCATCCCCAGTTTGAGAAGGGTAACGGTGCAATGGTGTATGGTGAACAA…	MWSEEEDKILIEVHKQIGNRWAEIAKRLPGRTENTIKNHWNATMRKRYLKRKLTTSINRNIKDSSASYINESTVLSNYIKSVVKSSAAASAEKKKGKTAVVYGEQSSLQNLPETDVYHPQFEKGNGAMVYGEQSTSLHDLPMSEVYRPQFEPSSYNMEWAASVAAPAAMNANKQLNNSRVEATMGSSSSYLSSNRTMYPEFYGYGNGAEKLDKTPF
7		Rmu_sc0008577.1_g000008.1 /pd	ATGTGGAGCGAAGAAGAGGACAAGATCCTCATTGAGGCGCACAAACAGATCGGAAACCGGTGGGCCGAGATAGCCAAGAGGCTTCCGGGGAGGACGGAGAACACTATCAAGAACCACTGGAACGCCACCAAGAGGAAGCGATACGCGAAGAGAAAACTGACTAGCACTATCAATTTGAACGTCAAGGAATCCTCTGCCAGCATACCTATTAATGAGAGTACTCTGCTGTCCAAATACATCAAGAGCATGGCGAGATCCTCGGCCACTGCTTCCGCCGAAAAGAAGAAGGGTAAGTCTGCAGTAGTGTCTGGTGAATCAAGTCCGCAAAGTTTAGCTGAGTCCGACGTCTATCGTCCCCAGCTTGAGAAGGGTAAGATTGCAGTGGTGAATGGTGATAAA…	MWSEEEDKILIEAHKQIGNRWAEIAKRLPGRTENTIKNHWNATKRKRYAKRKLTSTINLNVKESSASIPINESTLLSKYIKSMARSSATASAEKKKGKSAVVSGESSPQSLAESDVYRPQLEKGKIAVVNGDKSTSLHDLPESEVYRPQFETSHYDMEWAASVAAAAAVNANKQLNNSSVAATMGSISSYISSDRTMYPEFNGYGNGSHTGMQTKDKVRLSLEMNCLMQEQAHLKKPDVDLMEMIRGTRP
8		Rmu_sc0013280.1_g000006.1 /pd	ATGGATGCTCGCTTCTTTCTCGCCCTCTCCCTCTGTTTCTTCTTCTTCCTCTTCTTCTTCCCTCACGTCTCCCATTCCAGAGCTCGAATCTCAGACGTGATCCCCAAGAAGCAAACTGTGGGATCCCTGATCAGAATGAAGAGAGGTCCTTCTTCTGCTACATTCGATCCGTCTCGCGTCTCTCAGCTCTCTTGGAGTCCCAGGGCTTTTATTTATAAGAATTTTCTCTCTGAGGAGGAGTGTGATCATCTAATTAATCTGGCCAAAGATAAGCTAGAGGTGTCCATGGTGGCTGACAATGACTCTGGTAAGAGTATAAAGAGTGAAGTGCGGACGAGCTCCGGAATGTTCCTTTCGAAAGCTCAAGATGAAGTAGTTTCCAACATTGAGTCCAAGATT…	MDARFFLALSLCFFFFLFFFPHVSHSRARISDVIPKKQTVGSLIRMKRGPSSATFDPSRVSQLSWSPRAFIYKNFLSEEECDHLINLAKDKLEVSMVADNDSGKSIKSEVRTSSGMFLSKAQDEVVSNIESKIAAWTFLPIENGEAMQILHYENGQKYEPHFDYFHDKANQELGGHRVATVLMYLSNVEKGGETVFPHAQVKTVEAKDEVLSDCAKNGYSVKPFKGDALLFFSLLPNATTDPNSLHGSCPVIEGEKWSATKWIHVRSFEDSIRQGTSGGCKDQNANCFTWAKAGECEKNPVYMVGSEDLPGFCRKSCKPRMRNFLLAYPNMESEIGLWFLRKQVERLNRCGKSCRLRWTNYLRPDLKHDTFTPEEEEHIINLHKAIGSRWSLIAKQLPG…
9		Rmu_sc0000645.1_g000043.1 /fd	ATGAACTATCTCCGACCAGGTATAAAGAGAGGTAACATAACTCCTGATGAGGAAGACCTTATTGTGAGGCTTCATTCACTTCTGGGAAATCGATGGTCTCTAATTGCTGGAAGACTCCCCGGTCGAACCGATAATGAGATCAAGAACTACTGGAATACCAACCGCAGCAAAAGGCTCAACAACGCTGGTAGTACTGAAAGAGGTGTATCTAGTGTTGAAGGACAACTCAAGAAGGATGACCGAGGCTGTGTAGCAAAGGTTAAGGTTCATCAACCAAAGGCCATTCGAGTTTCTGCAAACTCAATCATAAGAAACAATAACATCTTAGCTGAATTGGGTCATCATGATGCAGAGGTTTCTAATGATCTTCATGATCATAAACATTTTGGAGAGGCCTTG…	MNYLRPGIKRGNITPDEEDLIVRLHSLLGNRWSLIAGRLPGRTDNEIKNYWNTNRSKRLNNAGSTERGVSSVEGQLKKDDRGCVAKVKVHQPKAIRVSANSIIRNNNILAELGHHDAEVSNDLHDHKHFGEALVCENVMDFDVFIQGYEEYQQQLLKADQDLDGVHLDSFVDSLLI
10		Rmu_sc0042048.1_g000001.1 /partial/fd	ACAAAATTAACAAGCCATCTAAATACTGAAGATTTGACTCGAATAGTTCGGTTTCTTGATCACTGGGGAATTATCAATTACTCTGCTGCCGCACCAAGTCCTGAGCCTTGGAATGGTAATTCCTACTTAAGGGAGGAGCAAAATGGTGAGATTCATGTTCCATCAGCTGCGTTGAAGTCGATTGATAGTCTGATCAAATTTGACAAGCCCAGATGTAGGCTTAAAGCAGCTGATGTTTATAAGTCATTGTCCTGTCATGACGACGATGATGACACCTCTGATTTGGACAACAGAATTCGAAAACGTCTCTGTGAAAATCATTGCAATTATTGTTCGTGTTCTCTTCCCAGTGTATGCTATCAGTCACAGAAGGAGGTTGATGTACTGCTGTGCTCTGAC…	TKLTSHLNTEDLTRIVRFLDHWGIINYSAAAPSPEPWNGNSYLREEQNGEIHVPSAALKSIDSLIKFDKPRCRLKAADVYKSLSCHDDDDDTSDLDNRIRKRLCENHCNYCSCSLPSVCYQSQKEVDVLLCSDCFHEGRYVVGHSSIDFIRVDSTKDYGDPDGENWTDQETLLLLEAMEIYNENWNEIAEHVGTKSKAQCILHFLRLPVEDGLLENIEVPKMPLSSNSSNRDDHGGFYSTSNGNSAGVLTYLWFTSFK
11		Rmu_sc0002119.1_g000031.1 /fd	ATGAGTCGGCACCACCTTGTCCTCGCACTCTTTGCTCTCCTCCTTCCTCTGGTCAAGGCCTTCGCAGACAGCGAGGTCATTGTAGTCGGTGGTTGGAGACCCATTGAGAACATCGGTGATCCCCATGTGAAGGAGATTGCAGAGTTCGCCGTGTCGGAGTACAGCCAATCCCAGAAGAAGAACTTGGTGTTTCAGAGCGTGGTCCGGGGAGAGACTCAGGTCGTAGCAGGCATCAAGTATCGGCTCGTCATATCTGTCAAGGAAGGTGATTCCTTCGAGAATTATGAGGCTGTTGTATGGGAGAAGAGATGGATGAAATCGCTTCACCTCCGTGACGTGAACGCTTCTGATTTCGCCAAGAAAAGTAGTGGGTTGTTCACACCGCAACACCAACAGTAC…	MSRHHLVLALFALLLPLVKAFADSEVIVVGGWRPIENIGDPHVKEIAEFAVSEYSQSQKKNLVFQSVVRGETQVVAGIKYRLVISVKEGDSFENYEAVVWEKRWMKSLHLRDVNASDFAKKSSGLFTPQHQQYRITVTTISIVPIKFFEAIRSLQCRKLCRHRRVCGDNSGWCLSSGESSHPPWKLKVLASSSSGSFCSSSPFCPGPVMDNFSSGEDLIVKARKPYTITKQRERWTEEEHNRFLEALKLYGRAWQRIEEHIGTKTAVQIRSHAQKFFSKLEKEAVSKGVPVGQSIDIDIPPPRPKRKPSNPYPRKSSEAAPTWSTSHVGAKDGKLVSSASSSHCKQAVDLEKGPLDERSSGEEKLSYGKENKDESCSEVFTLLSESHCSSVSSANKSSI…
12		Rmu_sc0034069.1_g000004.1 /fd	ATGTTGCCGTCTTTCTTTAATGGGAAGTCTGATGCTCGAACTCCCGATACATACCTGGAGATACGCAATTGTATTATGAAAAAATTCCATGCAAATCCGGGAACATTGGTTGAACTGAAGGATATGTTGGAGCTTGAAGTGGGAGACTTCGATTCAAGACAAGAATTAATGGAATTTTTGGACCACTGGGGTTTGATAAATTTCCACCCTTTCCCACCAACAGGTTCTACTGTTGCAAATGTCAACAGTGATGAGGTGACAGAAAGGGATTCTTTGGTAGATAAGTTGTATCACTTTGAAGCACTAGAATCACGATCATCAGTGGTTCCTAAGACTAACTTATTTACTCCAACTGTGCCATCTGGTCTGTTCCCAGAGTCTACATTTGCTGACGAATTG…	MLPSFFNGKSDARTPDTYLEIRNCIMKKFHANPGTLVELKDMLELEVGDFDSRQELMEFLDHWGLINFHPFPPTGSTVANVNSDEVTERDSLVDKLYHFEALESRSSVVPKTNLFTPTVPSGLFPESTFADELVRPEGPAVEYHCNSCSADCSRKRYHCQKQADFDLCSDCFNNGKFDSGMSSSDFILMEPAEAPGVSGGKWTDQETLLLLEALELYKENWNEIAEHVATKTKAQCILHFVQMPIEDTFLDRDDDIDASAKETADPTSTNNDLLPPKDAPETTENKTSANESDPQTSPMEISKEEASEVKVGEDTSRPEDENEVKVGQDTSKLEDTGDLKIDQETDENLALKALKEAFEVVGYPQTPESQLSFADVGNPAMALAAFLAQLVGPDHAIAS…
13		Rmu_sc0002112.1_g000023.1 /fd	ATGGAAGAAAAACGCGGAGACGCCGGAACTCAGCCTCCGGCTAATGCCGCCGACTCTCCGGCCGCCGAGCCTACTTCTTCGAGACGCCGCGCCGGAGGCCAAAAGCGAAAGGCCAGCAGCCTCGGCGGCTCCGGCTCTTCATCAACACCGTCGAAACGCTTGACTCGCGAGAAGGCTTCGCTTTCTCACCCTCCGATCCACAACGGCCCGTTGACGAGGGCCCGCCAGGGGCCCAATAACCATGCGTCGGCCTCAGCCGCGGCCGTGAAGCCTGCTGCTCAGACGAAGCGGCCGGAGCAGTCGTCGGTGGAGGCGGAGCGGGCTAAAAGGGAGAGCGAGTTGGAGGCTTTGGAGGCTTCTATGGAAGCTGAGTTTGAAGCCATTAGATCTCGCGATGCC…	MEEKRGDAGTQPPANAADSPAAEPTSSRRRAGGQKRKASSLGGSGSSSTPSKRLTREKASLSHPPIHNGPLTRARQGPNNHASASAAAVKPAAQTKRPEQSSVEAERAKRESELEALEASMEAEFEAIRSRDANAHVVPSHCGWFSWTKIHAIEERMLPSFFNGKSDARTPDTYLEIRNCIMKKFHANPGTLVELKDMLELEVGDFDSRQELMEFLDHWGLINFHPFPPTGSTVANVNSDEVTERDSLVDKLYHFEALESRSSVVPKTNLFTPTVPSGLFPESTFADELVRPEGPAVEYHCNSCSADCSRKRYHCQKQADFDLCSDCFNNGKFDSGMSSSDFILMEPAEAPGVSGGKWTDQETLLLLEALELYKENWNEIAEHVATKTKAQCILHFVQM…
14		Rmu_sc0001208.1_g000043.1 /pd	ATGGCGTCTCCAGCTATGGCACCAGTTCAAGACGATGATGATGATCAATATGGTGAGATTTCCTTTAGTCCTGCTGCTGTTGGGGTCCAATTGAAGGATCAATTATCTTCTGGAAATGACTATGCTCCCAAGGTGAGGAAACCATACACGATCACGAAACAGAGAGAGAGATGGACAGAGGAAGAGCATAACAAATTCCTTGAAGCTCTAAAACTCCATGGTCGGGCATGGCGAAAGATACAAGACCATGTTGGCAGCAAAACTGCGGTTCAGATTCGAAGTCATGCTCAGAAATTCTTTTCTAAGGTTGCTCGTGACCCAGATGGTATCAACACAAGCTCTGCAGATCCCATTGACATTCCTCCTCCTAGGCCAAAACGGAAACCAATGCGTCCTTAC…	MASPAMAPVQDDDDDQYGEISFSPAAVGVQLKDQLSSGNDYAPKVRKPYTITKQRERWTEEEHNKFLEALKLHGRAWRKIQDHVGSKTAVQIRSHAQKFFSKVARDPDGINTSSADPIDIPPPRPKRKPMRPYPRKHVHPLHTETSNLEQPIRSAPKKLSVSEIENQSPTSVLSPMGSDTIGSSDSSTPSGSLSPVSLKLELFPTDNVYDSGGSADEASARSLKLFGRTVLVTDSHRPLSGGTCKSISYDTQEEKCGQTSIPYNFMPIQCAFGNVEHVWNRHQLIHFPQCQNENWNRSGSSNLIPWCTLGADSSVPFLPFSNQQTMKSYFDCNLEDPHDKDVQKESSWNGSDAGSVSDEENGGKCLDVEMHGDLQISEKEKVEEPNSMLGTQLQVKTGI…
15		Rmu_co8458561.1_g000001.1 /partial/fd	CAGAGTGAAGCCACGGGATCAAACGCCTCTGTTGCAGCTGGCAATTGCAGTTCAAAAGGCGATGCTCAATCAAAATTGGTGACTGAACTCAAGGACACTTCTTCATTTGGCAATGACCAGGCACTTAAGGTCAGGAAACCTTACACAATTACAAAACAAAGAGAAAAATGGACTGAGGAAGAACATCAGAAGTTCCTTGAAGCTTTGAAATTGTATGGCAGAGGTTGGCGTCAAATAGAAGAACATGTAGGCACCAAAACTGCAGTTCAGATACGAAGTCATGCTCAAAAGTTCTTCTCTAAGGTAGCTAAGGAGTCAACTGGAAATGGTGAAGGCTCACTCAAACCAATTGAAATACCTCCTCCACGACCTAAGCGGAAACCTATGCATCCTTATCCA…	QSEATGSNASVAAGNCSSKGDAQSKLVTELKDTSSFGNDQALKVRKPYTITKQREKWTEEEHQKFLEALKLYGRGWRQIEEHVGTKTAVQIRSHAQKFFSKVAKESTGNGEGSLKPIEIPPPRPKRKPMHPYPRKLNGSPERRSPSPNFSVAEKGQESPTSVLSVPGSDVIGSAALDQYNRSRPSTSCTTDMRSTNLSHVEKENDYATSNSSLEEAKESMPPADSTLDEPLSMKDESASKYTSTTEGDAATVGGSTSIKLFGRTVLVSDLHKQSPPDTKGCTLSISMAKQENYEIECGKFGQPLQWDQSDTRLSLGGVVSNWNSLACGSTIDRSEHQNESPKSVQANPDALHPLPWWVNLPFCQVIRLNSRVDEQLKEKERSCAGSNDGSVSSIDSLCE…
16		Rmu_sc0003245.1_g000004.1 /fd	ATGGTGTCTGTGAACCCAAACCCAGCACCTCAGGGTTTCTACTTATTCGATCCCACCAACATGGGCCTTCCCGGCCTCAATTCCGTGCCGCCGCCCACGACGCCTTCTACGACCACCACCACCACGTCGTCCGCGCCCCAAAACGCCGCGTCGTTGGCCGAAGATCTGAGCAAGAAGATCCGGAAACCCTATACGATTACCAAGTCCAGGGAGAGCTGGACTGAACAGGAGCACGACAAGTTTCTAGAAGCTCTCCAGCTATTTGACCGCGACTGGAAGAAGATTGAAGCATTTATTGGCTCAAAAACGGTTATTCAGATACGTAGCCATGCACAAAAGTACTTTTTGAAGGTTCAGAAAAAAGGGACAAGCGAGCATGTACCTCCTCCTCGGCCAAAG…	MVSVNPNPAPQGFYLFDPTNMGLPGLNSVPPPTTPSTTTTTTSSAPQNAASLAEDLSKKIRKPYTITKSRESWTEQEHDKFLEALQLFDRDWKKIEAFIGSKTVIQIRSHAQKYFLKVQKKGTSEHVPPPRPKRKATHPYPQKAPKSAPVASQVVVPFESSSALLEHGYAYQPDSSFVLGTPVTSASLSSWSHSYVPPVNASQVTKDDGKLAGSTDAQNSCYSSSNESKPTTWLMGETVGRACHRQPQRG
17		Rmu_sc0012945.1_g000002.1 /fd	ATGGGATTTCATAGCCAAAGTTTCAGGTTTGAAGGTGGCGGGAGACAAATAATAGGTTTGAACAGAACCGGTAAGAGTTGCAGGTTAAGGTGGGTTAATTACTTGCACCCTGGCCTCAAAAGAGGCAAGATGACCCCTCAAGAAGAGCGCCTTGTGCTTGAGCTTCACTCCAAATGGGGAAATAGATGGTCAAGAATTGCTAGAAAGTTACCAGGGAGGACTGATAATGAGATTAAGAATTATTGGAGGACTCATATGAGGAAGAAGGCTCAAGAGAAGAAGAGGGCTGTGTCACCATCATCATCATCTTCCAACTGTTCGTCATCATCAAACATCACCACCAATGAAGGAGGAGCAAGCTTTTATGACACCGGTGGGGCTGAAATCGTGGCTTCATCA…	MGFHSQSFRFEGGGRQIIGLNRTGKSCRLRWVNYLHPGLKRGKMTPQEERLVLELHSKWGNRWSRIARKLPGRTDNEIKNYWRTHMRKKAQEKKRAVSPSSSSSNCSSSSNITTNEGGASFYDTGGAEIVASSAEKKNINSGDQEKEDGNDTTKRDQKEYSLDDIWKDINLPEVNSIEPVYDGSYGEEVCKFSCPLMATPPPLSWDSLFKIDEDQESKNMFLPTTPSDNQFLSCFEYGKASSLTG
18	2R	Rmu_sc0013825.1_g000001.1 /fd	ATGGAAGGAGAAGATGGTGCTGCTTCTGATCATCTTCACCATCATCATGGTGTTTATGGGTTTCAAAACAATCACATACAAACTCCTCATCAGCATCACAACCAACTCTTCAGGCCTGGTCCTCCGTTGACAGCCATAGACAGGTTCCTGTGGTCTCAAAACAATGCAAAGAACAAAGAGAGACTCGTCTCCTCAAATGGGTTTTCCTCATTTGGTGGTGCAATGGGTGATCTGCAGACTTGTTCGAATTGGCCGCCGAGTAGTCTCAGAGAGGCTAGCTTGGATGAACTGCTTTTTCTTGATCATGGTGAGGCCATGACTTGGCCTCCAGAGAAAATTCAAAACCCTAACATGGGGTTCAAAGAAGATCAAGTGAAGGTGGGTTCTAAAGGGGTGGGA…	MEGEDGAASDHLHHHHGVYGFQNNHIQTPHQHHNQLFRPGPPLTAIDRFLWSQNNAKNKERLVSSNGFSSFGGAMGDLQTCSNWPPSSLREASLDELLFLDHGEAMTWPPEKIQNPNMGFKEDQVKVGSKGVGKKAKKGSSVPLIKGQWTDEEDRKLMRLVKQYGVRKWAQIAEKLVGRAGKQCRERWHNHLRPDIKKDSWTEEEEKILVEAHAEVGNRWAEIAKRIPGRTENAIKNHWNATKRRQNSRRKNKQTDAKNGSSSSNKPPQPSILQNYIRSKNFNNKANNNSSSNATPTPSNISTTTPTSSSTLTQEEPSKIPFNIFLSDPSDLSSCEHSPLNITADSYSDEELLFMQNFFNNNNVHNHNQQQQPLPIDNYNNGLTANPMDTTDWFVTSTP…
19		Rmu_sc0005949.1_g000025.1 /fd	ATGGGAAGGTCTCCTTGTTGTGATGATAGTGGCCTCAAGAAAGGTCCCTGGACTCCTGAAGAAGATCAGAAGCTCATGAATTACATACAGAAACATGGCCATGGAAGCTGGAGAGCCCTTCCCAAACTTGCAGGGTTGAACAGATGTGGCAAGAGTTGCAGGCTAAGATGGACAAACTACCTTAGGCCAGATATAAAGAGAGGCAAATTTTCTCAAGAAGAAGAGCAAACAATTCTGAACCTTCATTCCATCCTTGGCAACAAATGGTCAGCAATTGCAAGCCACCTACCGGGTAGGACGGACAACGAAATAAAAAATTTCTGGAACACCCATTTGAAGAAAAAGCTGATTCAGATGGGTTTTGATCCGATGACCCACCGGCCTCGAACTGACATTTTC…	MGRSPCCDDSGLKKGPWTPEEDQKLMNYIQKHGHGSWRALPKLAGLNRCGKSCRLRWTNYLRPDIKRGKFSQEEEQTILNLHSILGNKWSAIASHLPGRTDNEIKNFWNTHLKKKLIQMGFDPMTHRPRTDIFSSLPHLLALVNLKDLIDQGSGQTSWDEQALRLQAEAAQMAKIQYLQYLLQPQASTSNNLSDFTDMETIGLLNSLCSSIKDVNPVFGSSQLETSAQYLGSSSVQDSIPFSPLPDLQMVPSSAYQKDMITNQAPDQFTVLSQLDNSPNNNSWNIPSSSNTSTPSPPSVVVPPVTETSTSNNNMGDACSTTTSSYGGVATISAWSDLLLEDYPFFNEIS
20		Rmu_ssc0000092.1_g000001.1 /fd	ATGGAGATTAACAAGCTAAGAGAAAACCTGGCCTCCCAAATCCCATTACTAGTGCCAGAGAACAACAGCTACATGATGAAACCCCACAACATGAAAGATGAGTTCATCCCATTTGAAGCTTCTTCTTCCTCAAAGGGTTACCTTCAAGATTTTCACCATCTTGATAATCAGTTTCATCAATATGCTAATGGGTCCTCATCAAATCCCATGTTTGGGGTCCAAAATCCATGTTTTGAACCTTATTACAATGACAACAATGCCTACACTTGTGACCAAGGCTCACCCACAGATGTAAATTTCTATGAGTGCAAGCCTCTAAACATTGCAGACAATTTGGGACATGGTCAAGTCTTGGACAACTTCCAAAGCTTGAATTTCCCACATCCCAGATCAAATTCC…	MEINKLRENLASQIPLLVPENNSYMMKPHNMKDEFIPFEASSSSKGYLQDFHHLDNQFHQYANGSSSNPMFGVQNPCFEPYYNDNNAYTCDQGSPTDVNFYECKPLNIADNLGHGQVLDNFQSLNFPHPRSNSIGHMMGISHRSGTNFLPLTNSQDIKPMSFVAPDEVSCINSENGYYKRAGINHKGTSRLSTIARAGSTFKGRKKNNVVKGQWTIDEDRVLIQLVAQYGVRKWSHIAQMLPGRIGKQCRERWHNHLRPDIKKDTWSEEEDKILIQAHAEIGNKWAEIAKRLPGRTENSIKNHWNATKRRQYSKRKCRSKYPRGSLLQDYIKSLNLDASPNTGRQRKNNNNSSNSSPADHNNASTASTKVQSQINVGFNSESDSRLVPNYEFSEEDPDF…
21		Rmu_sc0000903.1_g000030.1 /fd	ATGGATAGCGAATCGGTTCAGCGGCAACAGAGGGAGTTGGATCGGGTTAAGGGGCCGTGGAGCCCCGAAGAGGACGACTTGCTGAGGAAGCTGGTGCAGCGGCACGGCGCTCGGAACTGGACGCTGATAAGCAAGTCGATTCCCGGCCGGTCCGGCAAGTCGTGCCGGCTTCGGTGGTGCAATCAGCTCTCGCCGGAGGTGGAGCACCGGGCGTTCACGGCGGAGGAGGACAATATTATCGCGGCGGCGCATTCCAAGTTCGGCAACAAGTGGGCCACCATAGCCAGGCTCCTCAACGGCCGTACGGACAATGCGATCAAGAACCACTGGAACTCCACTCTGAAGCGGAAGTACTCGTCCATGGCGGAAGACGGCGTCTTCGGCGGAGGCGGTTCGATC…	MDSESVQRQQRELDRVKGPWSPEEDDLLRKLVQRHGARNWTLISKSIPGRSGKSCRLRWCNQLSPEVEHRAFTAEEDNIIAAAHSKFGNKWATIARLLNGRTDNAIKNHWNSTLKRKYSSMAEDGVFGGGGSIEEHHHHHHLRPEKKSATVSVSGRGYSPTSPSGSDVSDSGVVPAVSSAQVFRPVARAVLRTESPSSQNEMIHNEPEPSTLLTLSLPGGYSTELATRREERTTSLQQQQKEAENENRTMSFGPEFMSFMQEMIRREVRNYMDDMNGQHFGIPKLS
22		Rmu_sc0011027.1_g000001.1 /fd	ATGGATAGCGAATCGGTTCAGCGGCAACAGAGGGAGTTGGATCGGGTTAAGGGGCCGTGGAGTCCTGAAGAGGACGACTTGCTGAGGAAGCTGGTGCAGCGGCACGGCGCTCGGAACTGGACGCTGATAAGCAAGTCGATTCCCGGCCGGTCCGGCAAGTCGTGCCGGCTTCGGTGGTGCAATCAGCTCTCGCCGGAGGTGGAGCACCGGGCGTTCACGGCGGAGGAGGACAATATTATCGCGGCGGCGCATTCCAAGTTCGGCAACAAGTGGGCCACCATAGCCAGGCTCCTCAACGGCCGTACGGACAATGCGATCAAGAACCACTGGAACTCCACTCTGAAGCGGAAGTACTCGTCCATGGCGGAAGACGGCGTCTTCGGCGGAGGCGGTTCGATC…	MDSESVQRQQRELDRVKGPWSPEEDDLLRKLVQRHGARNWTLISKSIPGRSGKSCRLRWCNQLSPEVEHRAFTAEEDNIIAAAHSKFGNKWATIARLLNGRTDNAIKNHWNSTLKRKYSSMAEDGVFGGGGSIEEHHHHHHLRPEKKSATVSVSGRGYSPTSPSGSDVSDSGVVPAVSSAQVFRPVARAVLRTESPSSQNEMIHNEPEPSTLLTLSLPGGYSTELATRREERTTSLQQQQKEAENENRTMSFGPEFMSFMQEMIRREVRNYMDDMNGQHFGIPKLS
23		Rmu_sc0033719.1_g000001.1 /partial/fd	ATGAGCGGCGGTGGTGATAATAGAGTGAAGGGGTCGTGGAGTCCTCAGGAGGACTCAACGCTGATCAAGCTGGTGGCGGAGCACGGCCCGCGCAACTGGTCCTTGATCAGCTCCAGCATCCCCGGCCGGTCCGGAAAGTCGTGTAGGCTGAGGTGGTGCAACCAGCTCAGCCCCGACGTGCAGCACAAGCCGTTCTCCCCGGCCGAAGACGCCGCGATCGTCAGGGCCCACGCGCTGCACGGCAACAAGTGGGCCACCATCGCCCGGCTCCTCCCCGGCCGCACCGACAATGCCATCAAGAACCACTGGAACTCC	MSGGGDNRVKGSWSPQEDSTLIKLVAEHGPRNWSLISSSIPGRSGKSCRLRWCNQLSPDVQHKPFSPAEDAAIVRAHALHGNKWATIARLLPGRTDNAIKNHWNS
24		Rmu_sc0004000.1_g000004.1 /fd	ATGGCTGTGAATCGCAAGGAAATGGATCGGATGGATCGGATCAAGGGTCCGTGGAGCCCCGAGGAGGACGACGCTCTGCAGAGCCTAGTCCAGAAGCACGGGCCGCGGAACTGGTCTTTGATAAGCAAGGCCATTCCGGGGCGGTCCGGCAAGTCGTGCCGTCTCAGATGGTGTAACCAGCTCTCGCCGCAGGTGGAGCACCGCGCCTTCACTCCCGAAGAGGACGACACCATCATCCGAGCCCACGCGCGGTTCGGCAACAAGTGGGCCACAATCGCCAGGCTCCTCAACGGCCGCACCGACAACGCGATCAAAAACCACTGGAACTCCACCCTCAAGCGCAAGTGCTCTTCCATGAGCGACGACGGCGACGGTAACGGAAACGTGTTCGGTGGAGGG…	MAVNRKEMDRMDRIKGPWSPEEDDALQSLVQKHGPRNWSLISKAIPGRSGKSCRLRWCNQLSPQVEHRAFTPEEDDTIIRAHARFGNKWATIARLLNGRTDNAIKNHWNSTLKRKCSSMSDDGDGNGNVFGGGYDGNFHVQPPLKRSVSAGSGVPVSTELFMNPGSPSGSDVSDSSVQVMSPSHVYRPVARAGGVLPPVETTSSSNNNNNSHINLNSDPPTSLSLSLPGVDSCEVSNRVAATESTIQNQAHPAPAPGHINLNSDPPTSLSLSLPGVDSCEVSNRVAATESTIQNQAHPAPAPVSDPMRSFPAELLELMQGMIKKEVRSYMEGLEQSGFGMMKQQNDGFRNVAVKRIGISRIE
25		Rmu_sc0000871.1_g000019.1 /fd	ATGGCTTCTTCTTCTTCGACCAAGAAAGCCGCGGCGGATCGGATAAAAGGTCCGTGGAGCCCAGAGGAAGACGAAGCGTTACAGAGGCTGGTCCAGAGCTACGGCCCGAGGAACTGGTCTCTGATCAGCAAATCGATCCCTGGTCGATCCGGTAAGTCGTGCCGGCTACGGTGGTGCAACCAGCTCTCGCCGGAGGTGGAGCACCGGCCGTTTACTCCTGAAGAGGACGACACCATAATTCGAGCCCATGCCCGGTTCGGAAACAAGTGGGCCACCATCTCTCGCTTGCTCAATGGCCGCACCGATAACGCCATTAAGAACCACTGGAACTCCACGCTCAAGCGCAAATTCTCGTCCTTCTCCGACGACATGTCGCCCGAGCAGCCACTCAAAAGATCG…	MASSSSTKKAAADRIKGPWSPEEDEALQRLVQSYGPRNWSLISKSIPGRSGKSCRLRWCNQLSPEVEHRPFTPEEDDTIIRAHARFGNKWATISRLLNGRTDNAIKNHWNSTLKRKFSSFSDDMSPEQPLKRSASVGAGTAVSGLYMNPGSPSGSDLSDSSLPGVIPPSQAFRPVAPVADPPTSLSLSLPGSNEGPNHQRSASGSGSSWVVSPKPKAQIVQLQPQVIQAQPEDAGGGEAARQGNHNSEAGIDKQFFSAEFLDVMQEMIRKEVRNYMSGVDHNGMFMHTEAAIRNAVVKRIGISKVE
26		Rmu_sc0002021.1_g000013.1 /pd	ATGAGCGGCGGTGGTGATAATAGAGTGAAGGGGTCGTGGAGTCCTCAGGAGGACTCAACGCTGATCAAGCTGGTGGCGGAGCACGGCCCGCGCAACTGGTCCTTGATCAGCTCCGGCATCCCCGGCCGGTCCGGAAAGTCGTGTAGGCTGAGGTGGTGCAACCAGCTCAGCCCCGACGTGCAGCACAAGCCGTTCTCGCCGGCCGAAGACGCCGCGATCGTCAGGGCCCACGCGCTGCACGGCAACAAGTGGGCCACCATCGCCCGGCTCCTCCCCGGCCGCACCGACAATGCCATCAAGAACCACTGGAACTCCACGCTCCGGCGGCGGAGGCTGGCCGAGTCGAGCTCGGCCTCTTCCGAGTTGAAGCGGTTGATTGGCGCCACGTCGGACGACCCG…	MSGGGDNRVKGSWSPQEDSTLIKLVAEHGPRNWSLISSGIPGRSGKSCRLRWCNQLSPDVQHKPFSPAEDAAIVRAHALHGNKWATIARLLPGRTDNAIKNHWNSTLRRRRLAESSSASSELKRLIGATSDDPETKRQCLRGASAEEDSFKAVAAGVEGVLTSLTLSPPGQKVENEVVLKSEEVGEEEEEDNDDHQEEAVDDEEKCTVEMEETCLMTMMQRMIAQEVRNYIESLRAENGLVFGLQSTVQNDRKC
27		Rmu_sc0001735.1_g000008.1 /fd	ATGGGCCATCGGTGCTGTGGTAAACATAAGGTTAAGAGAGGTCTTTGGTCGCCGGAAGAAGACGACAAGCTCATCAAACATGTCACCACCCACGGCCATGGCAGTTGGAGTTCTGTCCCTAAACATGCAGGGTTGGAGAGGTGCGGAAAGAGTTGCAGGTTGAGATGGATAAACTATTTGAGACCAGAACTAAAGAGAGGCTCCTTTACTTCTGAAGAAGAACAGATTATTATTGATGTCCACAGAATTTTAGGCAACAGATGGGCTCAGATAGCGAAGCATCTACCTGGAAGGACAGACAATGAAGTGAAGAATTTCTGGAATTCTTGCATTAAGAAGAAGCTCATGTCACAAGGTTTGGACCCGCAGACCCATAACTTGATCTCTTCTCATAAAAGG…	MGHRCCGKHKVKRGLWSPEEDDKLIKHVTTHGHGSWSSVPKHAGLERCGKSCRLRWINYLRPELKRGSFTSEEEQIIIDVHRILGNRWAQIAKHLPGRTDNEVKNFWNSCIKKKLMSQGLDPQTHNLISSHKRSLASNKIAGSNAKLQSHINQKRPVFTVNNMSQIIDSSTEINYSISPPIVPLSNAQPPTVQPIMATPTDNQYLVHNPNSRWTSVTDIPTFPDSTQSITSASSSSAFGHLDGSNCIWAAGADPFEAAPGAMELQGEQSNGQVVQVEQEKEKLLEMEMKAMQDMDIAASFDQNSSFDFSLVEYCSTLMSGVVPHDHVNYSAADFTWNF
28		Rmu_sc0001298.1_g000013.1 /fd	ATGGCTCCAAAGAAAGAAGAGTCCGCTAAACGAGAAGTGATGAAGATGAAGTCGTTGGAAGCTGTTATGAAAAACACGAAAAGGGAGGTCAACAAGGGAGCTTGGACAGCTGAGGAAGATCAGAAGCTAGCTGAGGTTACTGCAATTCATGGTGCTAAAAAGTGGAAGTCAATTGCAGCCAAAGCAGGGCTGAATCGGTGTGGTAAGAGTTGCAGGCTAAGATGGCTGAACTATCTAAGACCAAACATCAAGAGAGGCAACATATCTGACCAAGAAGAGGACTTGATTCTCAGGCTGCACAAACTCCTTGGAAATAGGTGGTCTTTGATTGCCGGAAGATTGCCGGGTCGAACAGACAATGAGATAAAGAACTACTGGAACTCTCATTTGAGCAAGAGA…	MAPKKEESAKREVMKMKSLEAVMKNTKREVNKGAWTAEEDQKLAEVTAIHGAKKWKSIAAKAGLNRCGKSCRLRWLNYLRPNIKRGNISDQEEDLILRLHKLLGNRWSLIAGRLPGRTDNEIKNYWNSHLSKRINQKEKQRNTGGDDDSTRQISTVDQKPGTHLGEQNKIHGEMKQDSSSEEGTTTTTTTSASNKGGDDHENYSNLDIDIDDFFDFSNEGPFNLEWVNKFLY
29		Rmu_co8449019.1_g000001.1 /fd	ATGGGGAGGTCTCCATGTTGCGAGAAGGTGGGTTTGAAAAAAGGACCATGGACACCTGAGGAAGACCAAAAGCTACTGTCTTACATCCAGGAACATGGCCATGGAAGCTGGCGTGCTTTGCCCGCTAAAGCAGGGCTTCAAAGATGTGGGAAGAGCTGTCGACTGAGGTGGACTAATTACCTGAGGCCTGATATCAAAAGAGGAAAGTTTAGTTTGCAGGAAGAGCAGACCATCATTCAACTCCATGCTCTTCTCGGAAACAGGTGGTCAGCTATAGCAAATCACTTGCCCAAAAGAACAGATAACGAGATCAAGAACTACTGGAACACACACCTCAAGAAAAGACTGACCAAGATGGGCATCGACCCCGCGACCCACAAGCCCAAGCACCACGAAGCC…	MGRSPCCEKVGLKKGPWTPEEDQKLLSYIQEHGHGSWRALPAKAGLQRCGKSCRLRWTNYLRPDIKRGKFSLQEEQTIIQLHALLGNRWSAIANHLPKRTDNEIKNYWNTHLKKRLTKMGIDPATHKPKHHEAYGSGSGHAKDAANLSHMAQWESARLEAEARLVRESKQLIMTNHPLQFQHHQLVNISPSTQTHGLLMSKASAATSALPCLDVLKAWQGAWSSKPIIRDNNSSNNTIVSGMNLMMAMDDLESPTSTLNFPAAYNNTAYPMQSLNANKQLPQFKQEVTNTMVLQDIHAYNGCTDASTTTTNAWFNEDVMIRTSGGNDDVNNVMLPAAAAALSNIMEGFCGGTTADMLVYNSDEQNMAAGEISDTGGDESCGRSDNNVEENRSYWDSILN…
30		Rmu_sc0005291.1_g000001.1 /fd	ATGGGGAGGTCTCCATGTTGCGAGAAGGTGGGTTTGAAAAAAGGACCATGGACACCTGAGGAAGACCAAAAGCTACTGTCTTACATCCAGGAACATGGCCATGGAAGCTGGCGTGCTTTGCCCGCTAAAGCAGGGCTTCAAAGATGTGGGAAGAGCTGTCGACTGAGGTGGACTAATTACCTGAGGCCTGATATCAAAAGAGGAAAGTTTAGTTTGCAGGAAGAGCAGACCATCATTCAACTCCATGCTCTTCTCGGAAACAGGTGGTCAGCTATAGCAAATCACTTGCCCAAAAGAACAGATAACGAGATCAAGAACTACTGGAACACACACCTCAAGAAAAGACTGACCAAGATGGGCATCGACCCCGCGACCCACAAGCCCAAGCACCACGAAGCC…	MGRSPCCEKVGLKKGPWTPEEDQKLLSYIQEHGHGSWRALPAKAGLQRCGKSCRLRWTNYLRPDIKRGKFSLQEEQTIIQLHALLGNRWSAIANHLPKRTDNEIKNYWNTHLKKRLTKMGIDPATHKPKHHEAYGSGSGHAKDAANLSHMAQWESARLEAEARLVRESKQLIMTNHPLQFQHHQLVNISPSTQTHGLLMSKASAATSALPCLDVLKAWQGAWSSKPIIRDNNSSNNTIVSGMNLMMAMDDLESPTSTLNFPAAYNNTAYPMQSLNANKQLPQFKQEVTNTMVLQDIHAYNGCTDASTTTTNAWFNEDVMIRTSGGNDDVNNVMLPAAAAALSNIMEGFCGGTTADMLVYNSDEQNMAAGEISDTGGDESCGRSDNNVEENRSYWDSILN…
31		Rmu_sc0007300.1_g000006.1 /fd	ATGGGCCATCGGTGCTGTGGTAAACATAAGGTTAAGAGAGGTCTTTGGTCGCCGGAAGAAGACGACAAGCTCATCAAACATGTCACCACCCACGGCCATGGCAGTTGGAGTTCTGTCCCTAAACATGCAGGGTTGGAGAGGTGCGGAAAGAGTTGCAGGTTGAGATGGATAAACTATTTGAGACCAGAACTAAAGAGAGGCTCCTTTACTTCTGAAGAAGAACAGATTATTATTGATGTCCACAGAATTTTAGGCAACAGATGGGCTCAGATAGCGAAGCATCTACCTGGAAGGACAGACAATGAAGTGAAGAATTTCTGGAACTCTTGCATTAAGAAGAAGCTCATGTCACAAGGTTTGGACCCGCAGACCCATAACTTGATCTCTTCTCATAAAAGG…	MGHRCCGKHKVKRGLWSPEEDDKLIKHVTTHGHGSWSSVPKHAGLERCGKSCRLRWINYLRPELKRGSFTSEEEQIIIDVHRILGNRWAQIAKHLPGRTDNEVKNFWNSCIKKKLMSQGLDPQTHNLISSHKRSVASNKIAGSNAKLQSHINQKRPVFTVNNMSQIIDSSTEINYSISPPIVPLSNAQPPTVQPIMATPTDNQYPVHNPNSGWTSVTDIPTFPDSTQSITSASSSSAFGHLDGSNCIWAAGADPFEAAPGAMELQGEQSKGQVVQVEQEKEQLLEMEMKAMQDMDIAASFDQNSSFDFSLVEYCSTLMSGVVPHDHVNYSAADFTWNF
32		Rmu_sc0010190.1_g000009.1 /pd	ATGTCTTCTAATACCAAAAGCTTCAGCAGCAGTTCCAGTGAAGATGACAATGAACTTAGGAGAGGGCCATGGACTCTTGAAGAAGACACTCTTCTGATTCAATACATAGCTCGTCACGGTGAAGGCCGATGGAATCTGCTAGCAAATCGGGCAGGATTACGGAGAACTGGGAAGAGTTGCAGATTGAGATGGTTGAACTATCTGAAACCAGATGTTAAGCGCGGAAATCTTACTCCGGAAGAACAGCTGTTGATTCTTGACCTCCACTCCAAGTGGGGAAATAGGTGGTCGAAAATTGCGCAATACTTACCCGGAAGAACAGACAATGAAATCAAGAACTACTGGAGAACTAGAGTGCAGAAACAAGCAAAGCATCTTAAGATTGATACCGACAGCACA…	MSSNTKSFSSSSSEDDNELRRGPWTLEEDTLLIQYIARHGEGRWNLLANRAGLRRTGKSCRLRWLNYLKPDVKRGNLTPEEQLLILDLHSKWGNRWSKIAQYLPGRTDNEIKNYWRTRVQKQAKHLKIDTDSTEFQNIIRCFWMPRLLQKIGDQNQLAASHQHSITAPPSQPQFTEQGAVDMSGFVYDLDIKKQNTECILPSELPMESSNTSQFSDYYPSSSFGGAIVRNDHFVNNNSHDMEVFNLGNSAAADTCYVPESESNWLEIDFSCSMWNMDELLQRVFFNLSRPVRDLRSDCGVGKLNNGVLRSDCGVGAGAALRVEVGWNRSCFRIAATTIEFDGSRRSDWQGRGSSSFCSRRRPTGSWPEVGRSWPEVGRNLSERLDSPPFRFVNMFTSRK…
33		Rmu_sc0002260.1_g000004.1 /fd	ATGGGAAGAGCGCCGTGCTGTGAAAAAGTTGGGCTAAAAAGAGGAAGGTGGACAGCCGAAGAAGACGAGATCTTGACAAACTACATTCAACTCCATGGAGAAGGCTCTTGGAGATCTTTGCCCAAGAATGCAGGTTTGCTAAGGTGCGGGAAGAGTTGCAGACTGAGGTGGATAAATTATCTGAGGACTGACTTGAGGAGAGGGAACATCACACAAGAGGAGGAAGAAACCATTGTTAAGTTGCACACTGCTTTGGGTAATAGGTATGTAATAATGCATGCTCCTCACCATCTCCTATATATTTTGAGGACTGACTTGAGGAGAGGGAACATCACACAAGAGGAGGAAGAAACCATTGTTAAGTTGCACACTGCTTTGGGTAATAGGTGGTCATTGATT…	MGRAPCCEKVGLKRGRWTAEEDEILTNYIQLHGEGSWRSLPKNAGLLRCGKSCRLRWINYLRTDLRRGNITQEEEETIVKLHTALGNRYVIMHAPHHLLYILRTDLRRGNITQEEEETIVKLHTALGNRWSLIAAHLPGRTDNEIKNYWNSHLSRKIYTFTKLMKNECLIPTMINNVSKLAAAKSKRRVRTSRSAMKSKNKLNKNGTVLAPFPQVPNPAYKSDVFESLTRENPNQVQTSHSMGLECWAPKERDEKEEEEKTIRTLGGMQGSCLDITAGMISSTTPVIYAANNGEKEALDPYECVDSDVIVDHNPSGSTNVVRENGVMGFTDDHEVTIKSHQGIWSSNIEGSCGEMYAFSSPLNAAFDDHEWLDCDWFGGGGGGLQCHNDELELWGEREV…
34		Rmu_sc0002888.1_g000040.1 /fd	ATGGTGCCATTAAGCACTAGAAGTTACAAGAACAAGGAAATAAACAGAGGGTCTTGGACAGCAGAAGAAGATCAGAGACTGGCTCAAGTAATTGAAGTCCATGGCCCAAGAAAGTGGAAGTCTGTTGCAACCAAAGCAGGTCTAAGCCGATGTGGGAAGAGTTGCAGACTGAGATGGATGAACTATCTTAGACCAAATATTAAGAGAGGCAATATATCAGACCAAGAAGAGGACTTGATACTCAGGCTTCATAAACTCCTTGGAAACAGGTGGTCATTGATTGCCGGAAGACTGCCTGGTCGAACAGACAACGAGATTAAGAATTACTGGAACTCTCATTTGAGCAAGAAGATCAAGCATAACGAGAGATCACAAAAACAAAACAGACTACTTTGTGCA…	MVPLSTRSYKNKEINRGSWTAEEDQRLAQVIEVHGPRKWKSVATKAGLSRCGKSCRLRWMNYLRPNIKRGNISDQEEDLILRLHKLLGNRWSLIAGRLPGRTDNEIKNYWNSHLSKKIKHNERSQKQNRLLCASSNPAAQELSSSSEPQNVELMENNAVPIGMEDDSSKREENYFFKSMSFNGSSGDELLFDGSTADEGPLNLEWMNRFLEMDESWFTLHDI
35		Rmu_ssc0000073.1_g000001.1 /partial/fd	GCTTAATGGGGAGATCTCCTTGCTGTGAAAAGGCTCACACGAACAAAGGAGCTTGGACCAAAGAAGAAGATGATCGCCTCATTGCTTATATCCGAGCTCACGGCGAAGGCTGCTGGCGCTCTCTGCCTAAAGCAGCCGGCCTTCTTCGCTGCGGCAAGAGCTGTAGGCTGCGGTGGATCAACTACCTCAGACCGGACCTCAAGCGCGGAAATTTCACTGAAGAAGAAGATGAGCTCATCATCAAGCTCCATAGCCTCCTCGGGAACAAATGGTCTTTGATTGCTGGGAGACTACCGGGAAGAACAGACAATGAGATAAAGAACTACTGGAATACTCATATAAGAAGGAAGCTTTTGACAAGAGGTATTGACCCTGCAACTCACAGACCACTCAATGAAA…	LMGRSPCCEKAHTNKGAWTKEEDDRLIAYIRAHGEGCWRSLPKAAGLLRCGKSCRLRWINYLRPDLKRGNFTEEEDELIIKLHSLLGNKWSLIAGRLPGRTDNEIKNYWNTHIRRKLLTRGIDPATHRPLNETPQDSATTTTISFAASSAIIKEEDQKISTTESLKSGGRGVCFSCSLGLKDSKSCSSCGIDNIGATSAGTSNIAYDFLGLKNGVLDYRSLEMK
36		Rmu_ssc0000330.1_g000016.1 /fd	ATGTGCAGCAGTACAAGAGGGCACTGGAGGCCAGCTGAAGACGAGAAGCTTAGGGAGTTGGTGGAACGATATGGACCTCATAACTGGAACGCAATTGCAGAAAAGCTCCAAGGAAGATCAGGAAAGAGCTGTAGGTTAAGATGGTTCAATCAGTTGGACCCGAGAATCAACAGAAACCCTTTTAGTGAAGAGGAAGAAGAGCGTCTTCTAGCTTCTCATCGCATCCATGGAAATAGATGGGCTGTTATTGCAAGGCTTTTTCCCGGACGCACCGACAATGCAGTCAAGAACCATTGGCATGTCATTATGGCTCGCAGATGCAGAGAGAGGTCTAGGCTTCACCATCAACTTCACGCAAAAGGGATGACTAGGACTTCTACTAACAATAGTACTCCTCAC…	MCSSTRGHWRPAEDEKLRELVERYGPHNWNAIAEKLQGRSGKSCRLRWFNQLDPRINRNPFSEEEEERLLASHRIHGNRWAVIARLFPGRTDNAVKNHWHVIMARRCRERSRLHHQLHAKGMTRTSTNNSTPHHQVLMSSINHDELSKSSSNYKQDLQMILNCRQETMNDNSYIGNYCSATERNFHYYPAAFTHNTTLAPLIPNKDQFYPNTMHQDKNREPIEFYDFLQVNTESNRSEVIDINSRKDEEEVDQLEAIRHEQTKAAGAPFIDFFSGGSVTS
37		Rmu_sc0001846.1_g000012.1 /fd	ATGGATGATTATGGAGCTTCTCCTGCGGGCTCTGCAGATGAGTCAAAGTCGACGTCTTGCCCAAGAGGACACTGGCGGCCCGCAGAAGATGAAAGACTCCGGCAACTTGTCGAACAGTACGGTGCCCAGAACTGGAACTCCATAGCAGAGAAGCTTCAAGGAAGATCAGGGAAAAGTTGTAGGTTGAGGTGGTTTAATCAACTAGACCCAAGAATCAACAGAAGGCCGTTTAGTGAAGAAGAAGAAGAGAGGCTTCTAGCGGCTCATCGGATTCACGGAAACAAGTGGGCAATGATAGCAAGACTGTTTCCAGGTCGGACTGATAATGCCGTGAAGAATCACTGGCATGTTATCATGGCCAGACGGCAAAGAGAGCAATCTAAGCTAATTTGTGGTGGA…	MDDYGASPAGSADESKSTSCPRGHWRPAEDERLRQLVEQYGAQNWNSIAEKLQGRSGKSCRLRWFNQLDPRINRRPFSEEEEERLLAAHRIHGNKWAMIARLFPGRTDNAVKNHWHVIMARRQREQSKLICGGNKRSYQDFLISSDSISNTSSSISNTFDSRKLKSSTGFDHNQNSTTTSTVFEFRNPGKGRAMSFMESSRPKSSSSHNWNFASMTSSLSIPNSTSSAGFLRGSEISNYKVSECLKGNSDHLFVHRINGQYSSPAFVYGRYRGSGSSSTFGLPNPRRVNVPINPFGYLSSGTSPLGDIHEQHGSRMILKKEYLRAASSTTFEDHPHPHHDSSIEHNKEVPFIDFLGVGISS
38		Rmu_sc0002328.1_g000003.1 /fd	ATGGCTGGTGTTGCAAACAGTGTGTACACAAGTCCTAATGAAGAAGAGAATGAGATGAGAAAGGGGCCATGGACGCTTGACGAAGACACCCTGCTCATACATTACATTGCCAACCACGGCGAAGGACATTGGAATGCCTTAGCAAAATGTGCAGGATTGAAGAGGACAGGAAAAAGCTGCAGATTAAGATGGTTGAATTATTTGAAACCTGACATCAAGCGTGGGAACCTTACTCCACAAGAACAACTCTTGATCCTTGAACTCCATGCCAAGTGGGGTAACAGGTGGTCGAAAATAGCACAACATTTGCCAGGAAGAACAGACAATGAGATTAAGAACTATTGGAGAACAAGGGTGCAAAAACAAGCGCGCCAACTTAATATTGAGTCTGATAGCAAG…	MAGVANSVYTSPNEEENEMRKGPWTLDEDTLLIHYIANHGEGHWNALAKCAGLKRTGKSCRLRWLNYLKPDIKRGNLTPQEQLLILELHAKWGNRWSKIAQHLPGRTDNEIKNYWRTRVQKQARQLNIESDSKRFLDAVRCFWMPTLRQKMEQTSSLSLDPPSSSSSHSNYLTSQISIAPSLSTSPQTCSVPSSPPSKVVSHVSDYSPIGTSSPSHNSLSSDSLISQLPQITEQPASSSYAFEALNDNYYMDYDMEGFSLDPVSEMASFDTSQFDCQMAESDWIPSNYMTDTLWNMQGM
39		Rmu_sc0005014.1_g000023.1 /fd	ATGGGTCCTCAACAGCATCACCAGATGAGGAGTGACTCTAGTTATCGTCAAGATTTGAACTTTTTCCCATCACAACTGTGTCTCTCAAAAACCACCTTTGGAGTCGTGGCTAATTCGGAAATGGGTTATGGTGTTCATGACAGAAAGAGCACCATGTATCTGAATCTTGTTGGAGATGAATCTGATCATGATGACGTTATACAGACCACTGCTGCTGGCAAAACTAAGCTTTGTGTTAGAGGCCACTGGAGGCCAGCCGAAGACTCCAAACTCATAGAACTTGTGGCCCAGTTTGGTCCTCAAAACTGGAACTTGATTGCTGAGCATCTTGATGGCAGATCAGGGAAAAGTTGCAGACTGAGGTGGTTCAACCAGCTAGATCCAAGGATCAACAGAAGG…	MGPQQHHQMRSDSSYRQDLNFFPSQLCLSKTTFGVVANSEMGYGVHDRKSTMYLNLVGDESDHDDVIQTTAAGKTKLCVRGHWRPAEDSKLIELVAQFGPQNWNLIAEHLDGRSGKSCRLRWFNQLDPRINRRAFSEEEEERLLSAHRLYGNKWAMIARLFPGRTDNAVKNHWHVIMARKHREQSNVYKRRKPSSSSQPIIIPPHDHDEEDGTKNNAFSDRSTISINTSNDESGSAASASTCTNLSLTPSNRPLVPSFFKNINPFQQHKIFGSQMIAESCRIKGNENGQSTVSNSETSGDESVLTTYRTNNNNVSSMSGEDQNEKTSVMPFIDFLGVGST
40		Rmu_sc0015961.1_g000001.1 /partial/fd	ATGGCTCCAAAGAACGACGGATCCACAAAAAAGGTTATGAACAAAGGAGCCTGGACTGCAGAAGAAGATAGAAAACTTGCAGAGTACATTGAAATCCATGGTGCCAAGAGGTGGAAGACTGTGGCTTCCATAGCAGGTTTGAATCGATGTGGAAAGAGTTGCAGACTGAGATGGTTGAACTACCTGAGACCGAATATCAAGAGAGGAAACATATCTGGTGATGAAGAGGACTTGATACTTCGTCTTCATAAGCTACTTGGAAACAGGTGGTCGTTGATTGCGGGGAGACTCCCAGGCCGAACAGACAATGAAATAAAGAACTACTGGAATTCACATTTGAGCAAGAAAATAAAGCAGAAGAATGAGAAAGCTACATTGGCTTCGGCAGCGCAAGAGATT…	MAPKNDGSTKKVMNKGAWTAEEDRKLAEYIEIHGAKRWKTVASIAGLNRCGKSCRLRWLNYLRPNIKRGNISGDEEDLILRLHKLLGNRWSLIAGRLPGRTDNEIKNYWNSHLSKKIKQKNEKATLASAAQEISTTSTTTTTPPQKALNETSSVPADKDEEEQVKLGTSSDGIFDVNEFFDFSTEGSYGLEWVNKFLELDEDPMAAAYRENNK
41		Rmu_sc0014006.1_g000003.1 /fd	ATGGCTCCAAAGAACGACGGATCCACAAAAAAGGTTATGAACAAAGGAGCCTGGACTGCAGAAGAAGATAGAAAACTTGCAGAGTACATTGAAATCCATGGTGCCAAGAGGTGGAAGACTGTGGCTTCCATAGCAGGTTTGAATCGATGTGGAAAGAGTTGCAGACTGAGATGGTTGAACTACCTGAGACCGAATATCAAGAGAGGAAACATATCTGGTGATGAAGAGGACTTGATACTTCGTCTTCATAAGCTACTTGGAAACAGGTGGTCGTTGATTGCGGGGAGACTCCCAGGCCGAACAGACAATGAAATAAAGAACTACTGGAATTCACATTTGAGCAAGAAAATAAAGCAGAAGAATGAGAAAGCTACATTGGCTTCGGCAGCGCAAGAGATT…	MAPKNDGSTKKVMNKGAWTAEEDRKLAEYIEIHGAKRWKTVASIAGLNRCGKSCRLRWLNYLRPNIKRGNISGDEEDLILRLHKLLGNRWSLIAGRLPGRTDNEIKNYWNSHLSKKIKQKNEKATLASAAQEISTTSTTTTTPPQKALNETSSVPADKDEEEQVKLGTSSDGIFDVNEFFDFSTEGSYGLEWVNKFLELDEDPMAAAYRENNKALPKESQSQHKSKCP
42		Rmu_sc0004898.1_g000006.1 /fd	ATGGGGAAGTCCCGAACGTTAACTAACAGCACTGCTACGACTTCGGAGATAAAAAGAGGGCCATGGACTCCTCAAGAGGACAAGAAGCTCTTTGCTTTCATTCAACAACATGGCCATGGAAGCTGGCGGTCCTTGCCCGAGAAAGCTGGTTTACAAAGATGTGGGAAGAGCTGCAGGCTAAGATGGAGAAACTACCTAAACCCTGCTATTAAGAGAGGAAATTTCAGTTTGCAGGAAGACCAGACCATCATTCAGCTTCATGCACTTCTCGGCAACAGGTGGTCAGCCATAGCTGCGAACTTACCAAGGAGAACAGACAATGAGATAAAGAACTACTGGAACACACATCTAAAGAAGAGGTTAGCCAAGACAGGGTTTGATCCTGTAACCCACAAACCC…	MGKSRTLTNSTATTSEIKRGPWTPQEDKKLFAFIQQHGHGSWRSLPEKAGLQRCGKSCRLRWRNYLNPAIKRGNFSLQEDQTIIQLHALLGNRWSAIAANLPRRTDNEIKNYWNTHLKKRLAKTGFDPVTHKPKTAILASANGDPKNLSNLSHIAQWESARLQAEARFNMGTLMMSKSLAAGGGGGDEAGGDGRATNVVQEVGSFCNFDGVLGNNGRQFEAPKLTKSAAPDFNGVSEESGTDEYGDLFEALLLQQSYTNTGFDVVDAWTLEQCNDISADYQNVIMSGGLKNPFMFQ
43		Rmu_sc0007811.1_g000007.1 /fd	ATGGAACCGGAACTGGCCGAGGACTCCGTCGCCGTCATCGAAGTCGACGCCTCCGAAGACGACGCCGGAAGCGGCAAAGATGAGGCGGCCAAAGGCGGAAAGGGTAAGAAGGGAAAGAGCAAAGTGAGGGGGCCTTGGTCTCCGGAAGAAGACAAGGTGCTGAGTCGGCTGGTGAGTAAGTTCGGGGCCAGGAATTGGAGCTTGATCGCCCGCGGAATTTCCGGACGGTCCGGCAAGTCTTGCCGGCTCCGGTGGTGTAACCAGCTCGACCCCATCCTTAAGCGCAAGCCCTTTTCTGAGGAGGAAGATCAGATGATAATTGCAGCCCACACAATCCATGGAAACAAATGGGCTGCAATCGCAAGGCTTTTACCAGGAAGAACAGATAATGCCATAAAA…	MEPELAEDSVAVIEVDASEDDAGSGKDEAAKGGKGKKGKSKVRGPWSPEEDKVLSRLVSKFGARNWSLIARGISGRSGKSCRLRWCNQLDPILKRKPFSEEEDQMIIAAHTIHGNKWAAIARLLPGRTDNAIKNHWNSTLRRRDPDRMKSESGNMVEDISLDKTIASSEETLSNGDVNSSKSMEGKEVSSLEYTDDQHEDKVSTDGLYSNEAREPCTLFRPVARVSAFSVYNHLGGQDPSSSLQRPIPVQGPLVQAAKLDVGICKLVEGIYGEWSVPDQCGHGCCCTQNGRNTENSLLGPDFVEFSEPPCFPSFELAAIATDISNLAWLKSGLENSSARVTGDAAGSIPSHASQGQLGHFEESRMNHLFHHEERKDRLMSMKTNVLST
44		Rmu_sc0001120.1_g000006.1 /fd	ATGGGGAAGTCCAGAACGTTAACTAACAGCACTGCTACGACTTCAGAGATAAAAAGAGGGCCATGGACTCCTCAAGAGGACAAGAAGCTCTTTGCTTTCATTCAACAACATGGCCATGGAAGCTGGCGGTCCTTGCCCAAGAAAGCTGGTTTACAAAGATGTGGGAAGAGCTGCAGGCTAAGATGGAGAAACTACCTAAACCCTGCTATTAAGAGAGGAAATTTCAGTTTGCAGGAAGACCAGACCATCATTCAGCTTCATGCACTTCTCGGCAACAGGTGGTCAGCCATAGCTGCGAACTTACCAAGGAGAACAGACAATGAGATAAAGAACTACTGGAACACACATCTAAAGAAGAGGTTAGCCAAGACAGGGTTTGATCCTGTAACCCACAAACCC…	MGKSRTLTNSTATTSEIKRGPWTPQEDKKLFAFIQQHGHGSWRSLPKKAGLQRCGKSCRLRWRNYLNPAIKRGNFSLQEDQTIIQLHALLGNRWSAIAANLPRRTDNEIKNYWNTHLKKRLAKTGFDPVTHKPKTAILASANGDPKNLSNLSHIAQWESARLQAEARFVRQSKLIKPAPPAPQYLDFNLRTWETLMMSKSLAAGGGGGDEAGGDGRATNVVQEVGSFCNFDGVLGNNGRQFEVPKLTIPAAPDFNEVSEESGTDEYGDLFEALLLQQSYTNTGFDVVDAWTLEQCNDISADYQNVI
45		Rmu_sc0008339.1_g000020.1 /fd	ATGGTGAGAGCTCCTTGCTGCGAGAAAATGGGGTTGAAGAAGGGGCCATGGACTACTGAAGAAGACCAGATTCTCATCTCCTACATCCAAAATTACGGTCATGGAAATTGGCGAGCTCTGCCCAAGCATGCTGGCTTGTTGAGATGTGGGAAAAGCTGCAGACTCCGGTGGATAAACTATCTGCGGCCGGATATCAAGAGAGGAAACTTCACTAGAGAAGAAGAAGATGCCATCATCAATCTGCATGAAATGCTTGGTAACAGATGGTCAGCAATCGCAGCAAGATTACCAGGAAGAACTGATAATGAAATAAAAAATGTATGGCATACCCACTTGAAGAAGAGACTACTCAAACATAATAACACCACATCACCAACATGTAGCACTTCGAATCTCACA…	MVRAPCCEKMGLKKGPWTTEEDQILISYIQNYGHGNWRALPKHAGLLRCGKSCRLRWINYLRPDIKRGNFTREEEDAIINLHEMLGNRWSAIAARLPGRTDNEIKNVWHTHLKKRLLKHNNTTSPTCSTSNLTSRYAEPEGVNFESPTSHASMSPQPSSSDDFSSVTEASAATGQNMIKDEKIELDASFLEIDDSFWSEALSADNSGDNQLEFLEGTNDQAELQLLLPSNIDDGMDFWYDLFIKAGYGDTPELPEF
46		Rmu_sc0003147.1_g000018.1 /fd	ATGGAGGGTTTCGGCGTGAGAAAAGGTGCATGGACTAAAGAGGAAGATGAACTTCTGAGACAGGTCATCGAAAAGCATGGAGAAGGAAAATGGCATCAGGTTCCTTTCAAAGCAGGCTTAAACAGATGCAGGAAGAGCTGTAGGCTGAGGTGGCTAAATTATTTGAAGCCAAATATCAAGAGAGGAGAGTTTACAGTTGATGAAGTTGATATGATCATCAGACTTCATAAGCTTCTAGGAAACAGGTGGTCCTTAATTGCTGGAAGACTACCGGGAAGAACAGCCAACGATGTAAAGAACTATTGGAATACTTATCAACGGAAAAAGAATCAAAAGATGACTTCAGGCGCAAAAAAAATGAAAGATAAATCCCAAAAAAACACAATCGCCCCTTTGGTT…	MEGFGVRKGAWTKEEDELLRQVIEKHGEGKWHQVPFKAGLNRCRKSCRLRWLNYLKPNIKRGEFTVDEVDMIIRLHKLLGNRWSLIAGRLPGRTANDVKNYWNTYQRKKNQKMTSGAKKMKDKSQKNTIAPLVVRPRPRTFIKRLNFLERDANLEHIHSEENSSTSLPTAPPQTLELENVIDWWKVVSEDSTGSIDRTTCSSLGLEDDFFTNFWVEDMVQLSTIDGHDLVNNFYA
47		Rmu_sc0001206.1_g000043.1 /fd	ATGGGTCGGTCACCGTGCTGTGACAAAGTCGGGTTAAAGAAAGGTCCGTGGACTCCAGAAGAAGACCAGAAGCTCTTGGCTTATATCGAAGAACATGGCCATGGAAGTTGGAGAGCCCTCCCAATCAAAGCTGGGCTTCAGAGATGTGGAAAGAGCTGTAGACTGAGATGGACTAATTATCTGAGACCAGACATCAAGAGGGGAAAATTTAGTTTGCAAGAAGAGCAGACCATTATTCAACTCCATGCCCTCTTAGGCAACAGGTGGTCGGCGATAGCAACTCACTTGCCGAAGAGAACAGACAATGAGATAAAGAACTACTGGAACACACATCTCAAGAAGCGCTTAGCCAAAATGGGAATCGATCCGGTTACCCACAAGCCGAAAAACGACGCCCTG…	MGRSPCCDKVGLKKGPWTPEEDQKLLAYIEEHGHGSWRALPIKAGLQRCGKSCRLRWTNYLRPDIKRGKFSLQEEQTIIQLHALLGNRWSAIATHLPKRTDNEIKNYWNTHLKKRLAKMGIDPVTHKPKNDALLSTHDGQSKNAANLSHMAQWESARLEAEARLVRESKLRSHNSLINQLTSAAAAAAAAAASTSSSSAHQLLFMKGQSLESPTSTLTTYNSENVVPGIMPSSMIEFVGCSGASSGDHQDQTAAINAKEEGDVQVQDWKLGFGNVPSSSTHFGLHDNVTWTSNNEQVHHDRGIGSVDEVADQEGFTNLLLNNSVDRDQSMSDGGGGDSENGGSAGSDYYEDNKNYWNSILNLVNSSPSHDDSPIF
48		Rmu_sc0013612.1_g000010.1 /fd	ATGGAGGGTTTCGGCGTGAGAAAAGGTGCATGGACTAAAGAGGAAGATGAACTTCTGAGACAGGTCATCGAAAAGCATGGAGAAGGAAAATGGCATCAGGTTCCTTTCAAAGCAGGCTTAAACAGATGCAGGAAGAGCTGTAGGCTGAGGTGGCTAAATTATTTGAAGCCAAATATCAAGAGAGGAGAGTTTACAGTTGATGAAGTTGATATGATCATCAGACTTCATAAGCTTCTAGGAAACAGGTGGTCCTTAATTGCTGGAAGACTACCGGGAAGAACAGCCAACGATGTAAAGAACTATTGGAATACTTATCAACGGAAAAAGAATCAAAAGATGACTTCAGGCGCAAAAAAAATGAAAGATAAATCCCAAAAAAACACAATCGCCCCTTTGGTT…	MEGFGVRKGAWTKEEDELLRQVIEKHGEGKWHQVPFKAGLNRCRKSCRLRWLNYLKPNIKRGEFTVDEVDMIIRLHKLLGNRWSLIAGRLPGRTANDVKNYWNTYQRKKNQKMTSGAKKMKDKSQKNTIAPLVVRPRPRTFIKRLNFLERDANLEHIPSEENSSTSLPTAPPQTLELENVIDWWKVVSEDSTGSIDRTTCSSLGLEDDFFTNFWVEDMVQLSTIDGHDLFNNFYA
49		Rmu_sc0004331.1_g000015.1 /fd	ATGGGAAGAGCACCGTGTTGTGACAAAAACGGCCTGAAAAAAGGTCCATGGACGCCGGAGGAAGATCAGAAGCTCGTTGATTATATCCAGAAACACGGTTATGGCAACTGGAGGACGCTTCCAAAGAATGCAGAACTGCAAAGATGTGGAAAGAGCTGCCGTCTCAGGTGGACCAACTATCTGCGGCCTGATATCAAACGAGGAAGATTTTCTTTTGAAGAGGAGGAGACAATTGTTCAACTGCATAGCATTTTGGGCAACAAGTGGTCTGCTATTGCTGCTCGTTTGCCTGGAAGAACCGACAATGAAATCAAGAACTACTGGAACACCCACATTAGGAAGAGGCTTCTCCGAATGGGAATCGATCCGGTTACTCACAGTCCTCGGCTCGATCTGCTT…	MGRAPCCDKNGLKKGPWTPEEDQKLVDYIQKHGYGNWRTLPKNAELQRCGKSCRLRWTNYLRPDIKRGRFSFEEEETIVQLHSILGNKWSAIAARLPGRTDNEIKNYWNTHIRKRLLRMGIDPVTHSPRLDLLDFSSILYNSSHHHPQVNFSRLLGMQQMGLNPELLRLATILSSHRERNSNFFIQNDQQQHLCSPQNDQIPVQLVQSSQLQEPFQENVPVCATLNTGDIPFPHEVQPPTITDFSSQNCQISEWQSNGEAPSNFTENQYVQLPSLTYYDGSSDHQIVSDVSPETSNLYSYNSNNHNFNFTSVFSTPCSSPTPLNSNSTTYFNSGTEDERESYCSNILKFDIPNILDDFIHV
50		Rmu_sc0018739.1_g000001.1 /fd	ATGGGTCACCATTCTTGCTGCAACCAACAGAAGGTGAAGAGAGGGCTTTGGTCTCCTGAGGAAGATGAGAAGCTCATCAGATACATCACCACCCATGGCTATGGTTGTTGGAGCGAAGTCCCTGAGAAAGCTGGGCTTCAAAGGTGTGGTAAGAGCTGCAGGTTGAGGTGGATTAATTATTTGAGGCCTGATATTAGAAGAGGGAGATTTACTCCAGAAGAAGAGAAATTGATTATTAGCCTTCATGGGGTTGTAGGCAACAGATGGGCTCATATAGCAAGTCACCTGCCTGGAAGAACAGACAACGAGATCAAGAACTACTGGAATTCATGGATCAAAAAGAAGATTCGAAAACCTTCCCCACCATCATCGACTTCGACAACAACCAGCACCACTGCA…	MGHHSCCNQQKVKRGLWSPEEDEKLIRYITTHGYGCWSEVPEKAGLQRCGKSCRLRWINYLRPDIRRGRFTPEEEKLIISLHGVVGNRWAHIASHLPGRTDNEIKNYWNSWIKKKIRKPSPPSSTSTTTSTTAPIAQMGYNDSTQQLDFVSQDYIASKPHAQDQTIFSSTYPMFMFDTTAIDQLAAENYNARVELFQDMVSVGFSNPDVPWNLNQHQVQALPPPPPPPAMDINYLPPLIENMDSMLPIIDDHHHQVLQPNNCSNMDMEEGDHHHHQDQMAELNEWVVSQQQYSSSCPNFLFWDEMNGVVDDHQEPGSINIVGEDHHNIIVPATSSTTGANAVLLSSFPSSL
51		Rmu_sc0009959.1_g000001.1 /partial/pd	ATGCAGACGCCTCAGCTGGTGCAACTGCTTTGCTATTGGATCTGCTTGTTTCTCATGCCTCAGGGCCATAGCATAGGCCTTGTTCACTGTGGGAAGCGAATCCAGACCAATTATGTTGCTGTGGACTGTAGCGTAGCTTTCGTTAAGACCCATAAGGAATTTCATTGTTTTCTATGTCTCCATGTAACACTTCACTTCGGTGGCAATATTGCAAGTGCAGGCAGGAAAGCCACAAAGCGAATCCGCAGTAGTGGTCTAAAGCCCTCGATATATCCAGACTTCCAGTTCCAGAGAAAGATGGTGAGAAAACCATGCTGTAACAAAGACAGTGTGAACAAGGGAGCGTGGTCTGCTGAGGAAGATGAACTCCTAATTCGCTACATGAGAACACATGGAATG…	MQTPQLVQLLCYWICLFLMPQGHSIGLVHCGKRIQTNYVAVDCSVAFVKTHKEFHCFLCLHVTLHFGGNIASAGRKATKRIRSSGLKPSIYPDFQFQRKMVRKPCCNKDSVNKGAWSAEEDELLIRYMRTHGMCKWRDIPQGAGLNRCEKSCRLRWRNYLRPDIVRGNISDDEEDLIIRLHKLLGNRWSLIAGRLPGRTDNEIKNHWNSNLRKRLLKKAPRNQSKAHHPRGEP
52		Rmu_sc0011050.1_g000002.1 /fd	ATGGGTCCTCACCAACATCACCAGATGAGGAGTGACTCTAGTTATCGTCCAGATTTGAATTTTTTTCCATCACAACTGTGTCTCTCAAAAACTACCTTTGGAGTCGTGGCTAATTCGGAAATGGGTTATGGTGTTCATGACAGAAAGAACACCATGTATCTGAATCTTGTTGGAGATGAATCTGATCATGATGACGTTATACAGACCACCGCTGCTGGCGAAACTAAGCTTTGTGTTAGAGGCCATTGGAGGCCAGCTGAAGACTCTAAACTCAAAGAACTTGTGGCCCAGTTTGGTCCTCAAAACTGGAACTTGATTGCTGAGCATCTTGATGGCAGATCAGGGAAAAGTTGCAGACTGAGGTGGTTTAACCAGCTAGATCCAAGGATCAACAGAAGG…	MGPHQHHQMRSDSSYRPDLNFFPSQLCLSKTTFGVVANSEMGYGVHDRKNTMYLNLVGDESDHDDVIQTTAAGETKLCVRGHWRPAEDSKLKELVAQFGPQNWNLIAEHLDGRSGKSCRLRWFNQLDPRINRRAFSEDEEERLLSAHRLYGNKWAMIARLFPGRTDNAVKNHWHVIMARMHREQSNVYKRRKPSSNSQAVIIPQHDHDHGQEDGAKNNASSDRSTISINTSNDESGSAASASTCTNLSLTPSNSPLLPSFFKNINPFQQHKIFGSQMGAGRIKGNENGQLSDSNSETSGDESVLTTYRTNSNNVSSMSREAQSDKISVMPFIDFLGVGST
53		Rmu_sc0002888.1_g000020.1 /fd	ATGGGGAGAAGACCTTGCTGTACTAAGGAGGGAGTGAACAAGGGACCTTGGACAGCTGAAGAAGACAAGATGCTTGCGGATCATATCAAAGCTCATGGCGAACAAAAATGGAGCAGCATTCCTAAACAAACAGGGCTCAAGAGATGTGGGAAGAGTTGCAGGCTTCGGTGGTTGAATTATCTAAGACCGAATATAAAACGAGGCAACATTACGCAAGAGGAAGAGGACCTCATCATTAGGCTCCATAAACTCTTAGGAAACAGATGGTCTCTAATAGCAGGAAGAATTCCGGGGCGAACAGACAATGAAATCAAGAACTACTGGAACGGCCACTTGTGCAAGAAATCACAGCTGGAAAAGTCTAAGGTTGCAGCAAAGAATATGAGACCCTCCGACGAG…	MGRRPCCTKEGVNKGPWTAEEDKMLADHIKAHGEQKWSSIPKQTGLKRCGKSCRLRWLNYLRPNIKRGNITQEEEDLIIRLHKLLGNRWSLIAGRIPGRTDNEIKNYWNGHLCKKSQLEKSKVAAKNMRPSDEVKVEEDHRHDSKVESESSEGSLFSHSSTTATTTEEDSSDILMGFYTREITLSEFLDTDFTKFSSMISTDKVLMVQGEGEVQIQKQPQVSSSQAEAEANDEAPMNVIISPEMMDNLIVWEDQTDSDFGFQLSAAFTDSVADEERILDFMN
54		Rmu_sc0004219.1_g000005.1 /fd	ATGAGTCGAACAACAACTGACAGTGAAGATGGACTGCTGTCTAAGGATCAAATTGAGTCACCATTAATGGATGAGAGTAATGGAGGAATTGGAAATGGCGGAATTGTTCTAAAGAAAGGGCCATGGACATCGGCTGAAGATGCAATTTTGGTGGAGTATGTTAAGAAGCATGGGGAAGGAAACTGGAATGCTGTTCAGAAGCACTCAGGACTGTTCCGCTGTGGCAAAAGCTGCCGTCTGCGATGGGCAAATCACCTAAGGCCGAATCTGAAGAAAGGGGCATTCACACCAGAAGAAGAACGTTTGATTGTTGAACTCCATGCAAAGATGGGAAACAAATGGGCGCGAATGGCGGCACATTTACCTGGCCGTACGGATAATGAGATAAAGAATTACTGG…	MSRTTTDSEDGLLSKDQIESPLMDESNGGIGNGGIVLKKGPWTSAEDAILVEYVKKHGEGNWNAVQKHSGLFRCGKSCRLRWANHLRPNLKKGAFTPEEERLIVELHAKMGNKWARMAAHLPGRTDNEIKNYWNTRIKRRQRAGLPLYPPEVCLQALQESQQGQSSGALNGTDTAHHDSLQTNSYEIPDVVFDSLKGNSCVLPYVPELPDISASGMLMKGLGSSPYCGFMPPTMHRQKRPRESTALFPTSGGSYKDGFPQFDQFENDACDKVARSYGLSFPHDPDPTTKSPLSFGVIQGSHSLSNGNSSASKPTCGAVKLELPSLQYPETDLGSWSTSPPPPLLESIDNFIQSPPPVGAFESDCASPRNSGLLDALLYEAKTLSSTKNHSTDKSSNSSS…
55		Rmu_sc0002549.1_g000025.1 /fd	ATGATGGCCAATCACAATGCTAGTGCTATAAATGCAACAGAAAATCCAAATGCCTTGAGTTGTTTCCCATCCTCATCTTCCTGTTCTTCTTCTTCTTCACCTGGTTTTTCAATGGGGATGGTTTATGCAGATATGGGCTCCCTTTCCCTCAGTGTCTCCAACTATGATCTAGTTTCTTCTCACGAGAGCAGTTATTACAATACCTCAAACTCAAACCTCTCTCATAATCATGAAGTGGAAAATGGTAATACACCATATTTCTGGGGGTTTCCGCCGTCTTTGGGAACCAGAAGCGCCGAGGAACACCACGGCCACCACAACAACAGTGACTTTCGCGGAGGCGGTAAGGCCTGTTCAGATAGCATGAGTGATGATGGGACTGAGGAACATAATGAGTCT…	MMANHNASAINATENPNALSCFPSSSSCSSSSSPGFSMGMVYADMGSLSLSVSNYDLVSSHESSYYNTSNSNLSHNHEVENGNTPYFWGFPPSLGTRSAEEHHGHHNNSDFRGGGKACSDSMSDDGTEEHNESMNHKNGQSKLCARGHWRPAEDSKLKELVALYGPQNWNLIAEKLEGRSGKSCRLRWFNQLDPRINRRAFSEEEEERLMQAHRIYGNKWAMIARLFPGRTDNAVKNHWHVIMARKYREQSSAYRRRKLSQSVCRASSMEENMNSAPPAVPYSYLNNYGSSGNSHNMASWEEAAIITNEKVPPPFQFLPGTNDEAGQISSGNFYDHPPYMMNVMAMRQSNYYHTLQSFSDSTSASPSLVSAGGKLSSTTSAGDQERRDIAPSFIDFLGV…
56		Rmu_sc0003639.1_g000007.1 /fd	ATGGGTAGATCTCCTTGTTGTGATGATCAGAGTGGTTTGAAGAAAGGTCCATGGACAACCGAAGAAGATCAGAAGTTGGTTGATTACATTAACACAAATGGCCATGGAAGCTGGAGAGCTCTCCCCAAGCTTGCAGGCCTCAACAGGTGTGGCAAGAGTTGCAGGTTAAGGTGGACTAATTACCTGAGGCCTGATATCAAGAGAGGTAAATTCTCCGAAGAAGAGGAAAGAGTTATCATCAACCTTCATGCAGTTGTTGGGAACAAGTGGTCTAAGATTGCTACTCATCTTCCGGGGCGAACTGATAATGAAATCAAGAACTTTTGGAACACTCATCTGAGAAAGAAGCTGCTACAAATGGGACTTGATCCAAACACCCACAAGCCAAGGACAGACCTC…	MGRSPCCDDQSGLKKGPWTTEEDQKLVDYINTNGHGSWRALPKLAGLNRCGKSCRLRWTNYLRPDIKRGKFSEEEERVIINLHAVVGNKWSKIATHLPGRTDNEIKNFWNTHLRKKLLQMGLDPNTHKPRTDLNHLLNLSQLLSTANIGNMMTSTPWDNALRLQASAAQLAKMQLLQNLYMQVINSSVAPDIDNKTSTGLFGSQNINLFGGNFSGASTMVGGQEWNPDSIPGAPNELNTISNSLEGFEGLNSNINTNLMSSCYDIQSFKSQFAELVSASSPGSSTNNNQIESTSTGDIPAAGQSSPTSIFEAWEKLMDDDTSESYWKDILQ
57		Rmu_sc0006317.1_g000008.1 /fd	ATGAGGAAACCCTGCTGCGACAAGCAAGACACGAACAAAGGAGCTTGGTCGAAACAAGAAGACCAGAAGCTCATCGATTACATTCGCAAACATGGTGAGGGTTGTTGGCGTACCCTCCCTCAAGCTGCAGGCCTTCTTCGATGCGGTAAAAGTTGCAGACTTCGGTGGATAAACTATCTACGGCCAGACCTTAAAAGAGGCAAGTTTGCTGAAGATGAAGAAGACCTCATCATTAAACTTCATGCACTCCTAGGCAATCGGTGGTCGCTTATTGCTGGAAGATTGCCGGGACGTACAGACAATGAAGTGAAGAACTATTGGAACTCGCATTTGAGAAGAAAGCTTATGAACATGGGTATAGATCCAAACAACCATCGACCAACCAACACTCTCCTCCCT…	MRKPCCDKQDTNKGAWSKQEDQKLIDYIRKHGEGCWRTLPQAAGLLRCGKSCRLRWINYLRPDLKRGKFAEDEEDLIIKLHALLGNRWSLIAGRLPGRTDNEVKNYWNSHLRRKLMNMGIDPNNHRPTNTLLPRPHNHHQSPPQTLKSPAGSGINNFNHEPVVIESKSSRGDDQNCEQVSDGRSCLEDDSSCGGHHLPDLNLDLTVHLSAPNFSSPNDDHQCLIKELNEPIHRPHLNISDPPEMLIGTKSAIFASSTTLPLFR
58		Rmu_sc0010880.1_g000002.1 /fd	ATGGGTCACCACTACTGCTGCAAAGAACGGAAGGTTAAGAGGGGCCTTTGGTCCCCTGAGGAAGATGAAAAGCTGTTGAGATACATCACTACCTATGGCCATGGATGTTGGAGAAAAGTCCCTGAGCAAGCTGGGCTACAAAGGTGTGGTAAGAGCTGTAGACTGAGATGGCTCAATTACTTGAGACCTGATATCAAAAGAGGAGTGTTTACACCAGATGAGGAGAAATTGATTATTAGACTGCATGGGGTTGTAGGGAACAGATGGGCGCATATCGCAAAGTGTCTTCCAGGAAGAACTGACAATGAAATAAAGAACTACTGGAACTCATGGATAAAGAAGAAGCTAGAGAAGCCTTCTTCACCAATGACCACATCTGCTGATCATCATCATCAATAT…	MGHHYCCKERKVKRGLWSPEEDEKLLRYITTYGHGCWRKVPEQAGLQRCGKSCRLRWLNYLRPDIKRGVFTPDEEKLIIRLHGVVGNRWAHIAKCLPGRTDNEIKNYWNSWIKKKLEKPSSPMTTSADHHHQYSQMACLNPNNQDHIVNQTFIARPSAYPLYMFEAASLDHDGTTRANNININVHVDQHFPLNVNSNNLGACILDRHNVQPLPSTAPFTNMDANLLMPSLIGSTTTVNANMVEVESCSNIDEEGDISMECLQSHQDLIAVVHSRQQQPCSNFHFCWDTVEEQHGGDEIAGPLHRNTGANMMSSSLPSYL
59		Rmu_sc0007200.1_g000002.1 /fd	ATGGGGGGGAAGGGAAGAACACCATGTTGTGATAAGAGCCAAGTGAAGAGAGGTCCCTGGAGTCCTTCTGAGGACTTGAGGCTTATCAGCTTCATTCAGAAACACGGCCATGGTAACTGGAGGGCTCTCCCTAAACAAGCAGGTCTACTGCGATGTGGGAAAAGTTGTCGTTTGAGATGGATTAACTACCTTCGGCCTGATCTGAAGCGAGGTAACTTCACAAAAGAGGAAGAGGAGTCCATAATTAAGCTACATGAAACTTGGGGAAACAAGTGGTCCAAAATTGCATCCCATTTTCCTGGAAGAACAGACAACGAAATCAAGAATGTGTGGAACACTCATCTGCGGAAGAGATTGGCTTTGAAGAAATCTTGTGGAGATGATCAATCAAAGGATTTA…	MGGKGRTPCCDKSQVKRGPWSPSEDLRLISFIQKHGHGNWRALPKQAGLLRCGKSCRLRWINYLRPDLKRGNFTKEEEESIIKLHETWGNKWSKIASHFPGRTDNEIKNVWNTHLRKRLALKKSCGDDQSKDLSSITSSSSSSSSASFQLSRGKPSVGSTAEFEHQSNHECNMSKNRNDCELPNSTTIQEKLDQNILMEVTNQVRVDDAKGVKTLTISSSFSSHDSSNGSSSSQGGGISRPDDLVFDFEGAYEPQIADKEVFEIPFESDHDFWNMLDEFVPFQSNPEPLLPQADQTYQSSNLELVESGKWLSYLESELGLEDSTKTEINNQDFVMKDATEQLVPEKYCDKLPKPAEIDQDMDDYFGMWPSWPDNSGN
60		Rmu_sc0012989.1_g000008.1 /fd	ATGGCAGCTCATATGGGTTGGGGAATAATAGAAGAAGAGGGTTGGAGAAAGGGTCCTTGGACTTCTGAGGAAGATAGATTGCTTATTGAGTATGTAAGGCTTCATGGTGAAGGAAGATGGAACTCTGTGGCTAGGCTTGCAGGACTGAAAAGAAATGGAAAGAGCTGCAGACTGAGGTGGGTGAATTATCTGAGGCCAGACCTTAAGAGGGGGCAGATAACTCCTCATGAAGAGAGCATAATTCTAGAGCTACATGCTAGGTGGGGGAACAGGTGGTCAACGATTGCAAGAAGCTTGCCTGGGAGGACTGATAATGAGATCAAGAACTACTGGAGGACCCATTTCAAGAAAAAGGCCAAAGTACCTTCTGATGCCTCTGAGAAGGCCAAAACTCGCCTC…	MAAHMGWGIIEEEGWRKGPWTSEEDRLLIEYVRLHGEGRWNSVARLAGLKRNGKSCRLRWVNYLRPDLKRGQITPHEESIILELHARWGNRWSTIARSLPGRTDNEIKNYWRTHFKKKAKVPSDASEKAKTRLLRRQQFHHQQQQQQQLQLINQADMKRIMALLDENDTKISSWPPQAAQGKQDVDTSTIAYPNHTITEEQGFFYSMLNGNVPQQVAEASSSEDSFLWDGLWNLDDVHVNFTTSSCATGKASTFHNFVVPFC
61		Rmu_sc0007188.1_g000001.1 /fd	ATGGGTAGATCTCCTTGTTGTGATGATCAGAGTGGTTTGAAGAAAGGTCCATGGACAACCGAAGAAGATCAGAAGTTGGTTGATTACATTAACACAAATGGCCATGGAAGCTGGAGAGCTCTCCCCAAGCTTGCAGGCCTCAACAGGTGTGGCAAGAGTTGCAGGTTAAGGTGGACTAATTACCTGAGGCCTGATATCAAGAGAGGTAAATTCTCCGAAGAAGAGGAAAGAGTTATCATCAACCTTCATGCAGTTGTTGGGAACAAGTGGTCTAAGATTGCTACTCATCTTCCGGGGCGAACTGATAATGAAATCAAGAACTTTTGGAACACTCACCTGAGAAAGAAGCTGCTACAAATGGGACTTGATCCAAACACCCACAAGCCAAGGACAGACCTC…	MGRSPCCDDQSGLKKGPWTTEEDQKLVDYINTNGHGSWRALPKLAGLNRCGKSCRLRWTNYLRPDIKRGKFSEEEERVIINLHAVVGNKWSKIATHLPGRTDNEIKNFWNTHLRKKLLQMGLDPNTHKPRTDLNHLLNLSQLLSTANIGNMMTSTPWDNALRLQASAAQLAKMQLLQNLYMQVINSSVAPDIDNKTSTGLFGSQNINLFGGYFSGASTMVGGQEWNPDSIPGAPNELNTISNSLEGFEGLNSNINTNLMSSCYDIQSFKNQFAELVSASSPGSSTTNNQIESTSTGDIPAAGQSSPTSIFEAWEKLMDDDTSESYWKDILQSMS
62		Rmu_sc0003043.1_g000017.1 /fd	ATGGCCTCAGAGAAACAAGAGCCCACCGCAAGAGAATTCGTCAAGGGAAAGTGGACACCGCAAGAAGACGAGAAACTAACCGAGGCTATTGCAGTTCATGGTGCAAAGAAGTGGAACTCATTAGCGTCTAAAGCAGGGCTGAATCGGAATGGCAAGAGTTGCAGGCTGAGATGGGTGAACTATCTGAGACCCAACCTCAAGAGAGGCGACATGTCTGACCAGGAAGAGGACATGATTATTAGGCTGCACAAGCTTCTTGGAAATAGGTGGTCTTTGATTGCGGGAAGATTACCGGGTCGAACAGACAATGAGATAAAGAACTACTGGAATACCCATTTGAGCAAGAAAATTAACCAGAAAGAGAAGCAAAGTAGCAATGGATCTAATTCGACAATACAG…	MASEKQEPTAREFVKGKWTPQEDEKLTEAIAVHGAKKWNSLASKAGLNRNGKSCRLRWVNYLRPNLKRGDMSDQEEDMIIRLHKLLGNRWSLIAGRLPGRTDNEIKNYWNTHLSKKINQKEKQSSNGSNSTIQIPTVDEKPSVADDDRKVHVEMKQECLSSGVGTSAALIKKEVMIDPEDYSNTNINNIDVDDFFNLLHKEPLSWEVPQIP
63		Rmu_sc0008155.1_g000001.1 /fd	ATGACAGTCCCAAACGACGCCGCTTCCAAACTCGACAGCCACCGCGCCGAGCCGGACGCGTCATCTTCACTCGCCGATGACGGCGGTGAGGTCGCCGCTGGGAAAGTGAGGGGATCGTGGTCGCCCAAAGAGGATGAGATGCTGACTCGGCTGGTCACCCAGTTTGGCGCCAGAAACTGGAGCGTCATCGCCAGAGGAATTCCCGGCCGGTCCGGCAAGTCTTGCCGGCTCCGGTGGTGCAATCAGCTTAACCCTGGTGTAAAGCGCAAACCTTTCTCCGATGAAGAAGATCGTATTATAGTTGCAGCTCATGCCACTCATGGGAACAGATGGGCGATAATTGCAAAGCTCCTTCCAGGTAGAACAGATAATGCAATAAAGAATCACTGGAATTCTACT…	MTVPNDAASKLDSHRAEPDASSSLADDGGEVAAGKVRGSWSPKEDEMLTRLVTQFGARNWSVIARGIPGRSGKSCRLRWCNQLNPGVKRKPFSDEEDRIIVAAHATHGNRWAIIAKLLPGRTDNAIKNHWNSTLKRGRKYIPRTRNMKEDSSLERSKASSEETVSAGNLSSVRTPEGREVLIIDNSFNQLDGRCQTEDGVAVTELKDNSTLVSELKEESTLCRPVARVSAFSAYNPSNGPSNGSIVPRPVPIHGPLVQTSNLDFDFCNSLEGDCNEPMVPLRCGHGCCDRSGGHFQSSLLGPEFIDYEEPPSFSSPEFISCATDVNNIAWIKSGLENRETMRVAENVASQRFSQGAAATPQMGYYEMNMMNGHMRFVEGQNRLMGMMTEMLSTPMPRQT…
64		Rmu_sc0002320.1_g000018.1 /fd	ATGACTAAAGGAGCGTGGTCGATACAAGAAGACCAGAAACTCATTGACTACATCCAAAAACATGGCGAAGGTTGCTGGAATTCTCTTCCTAAGGCTGCAGGGTTGCGTCGTTGCGGTAAGAGTTGTCGACTGAGATGGATAAACTATCTACGACCAGATCTTAAACGAGGAAGCTTTGGAGAAGATGAAGAGGATCTCATCATCAGGCTTCATACACTCCTTGGGAATAGGTGGTCGCTAATAGCTGGAAGACTGCCTGGAAGGACAGATAACGAGGTGAAGAATTACTGGAACTCTCATTTAAAGAAAAAGCTACTGAACATAGGCACCACTACTCTTCGTCCAAATAAGCCCCGCGAGATTAACCATGCACCTTATAATAAGCTTGTCAAGTACTTC…	MTKGAWSIQEDQKLIDYIQKHGEGCWNSLPKAAGLRRCGKSCRLRWINYLRPDLKRGSFGEDEEDLIIRLHTLLGNRWSLIAGRLPGRTDNEVKNYWNSHLKKKLLNIGTTTLRPNKPREINHAPYNKLVKYFNDMDDEVVDEVSADSGSTGISSCLVPKLNLDLSLSLALE
65		Rmu_sc0002207.1_g000004.1 /fd	ATGGTGAGAGCTCCGTGCTGCGAGAAGATGGGGTTGAAGAAAGGGCCGTGGACGCCGGAGGAGGATCACGTACTCGTCTCTTACATTCAGCAGTACGGCCATGGAAACTGGAGGGCGCTTCCCAAACTGGCAGGGTTGTTGAGGTGTGGGAAGAGTTGCAGGCTGCGGTGGACGAACTACCTGAGGCCGGATATCAAGAGAGGGAATTTTAGCAGGGAGGAAGAGGAGGCCATCATCAACTTGCATCAAATGTTGGGGAATAGATGGTCAGCAATTGCAGCAAGATTGCCTGGTCGCACAGACAATGAAATAAAAAACGTTTGGCACACCCACTTGAAAAAGAAGCTCAGCATCAAGCAGAATTCTACCACACCAGAAGCACAAGGTCAGGAATCCGAA…	MVRAPCCEKMGLKKGPWTPEEDHVLVSYIQQYGHGNWRALPKLAGLLRCGKSCRLRWTNYLRPDIKRGNFSREEEEAIINLHQMLGNRWSAIAARLPGRTDNEIKNVWHTHLKKKLSIKQNSTTPEAQGQESEPEPKPENTSCYAKSESFEYGPVSPPQCTTSSADDTSSFTTSENNTCSANMGMKVDYEMNLPQADESFWSEVLSADQNCSNETVSCDFDQAIGAAADPQVNATVEVPVDFGFSGSNMYDNCMDFWYNVFTTAGEISELLEI
66		Rmu_sc0027086.1_g000003.1 /fd	ATGGGTGGTATTCCCTGGACTAAGGAAGAGGATCAGTTGCTGAGGAAATGCATAGAGAAGTATGGAGAAGGCAAATGGCATCGAATTCCTCACTTAGCCGGTCTAAACAGGTGCCGTAAGAGCTGCAGGCTTCGGTGGCTAAACTACCTTCGGCCGAACATCAAGAGAGGGAGCTTTGAACAAGAGGAAGTTGAGCTCATCATCCAGCTCCAAAGGCTCTTGGGAAACAGGTGGTCATTAGTTGCAGCTAGGCTTCCGGGGAGGACTGGTAATGATGTGAAGAACTATTGGAATTGTCACTTGAGCAAAAAGCTAAATGCTCAAGAAACTCATGGTGATCATCAGAAGATTAATCATGCAGGGAATAATAATTTACAAGTCATAAGACCCCAAGCTTCA…	MGGIPWTKEEDQLLRKCIEKYGEGKWHRIPHLAGLNRCRKSCRLRWLNYLRPNIKRGSFEQEEVELIIQLQRLLGNRWSLVAARLPGRTGNDVKNYWNCHLSKKLNAQETHGDHQKINHAGNNNLQVIRPQASKYASSNSKRSMISSTLEDQTCQALEECSNASVAMLCNIDKDQGQISQIVEREDSNNPICSVFVLVSV
67		Rmu_ssc0000155.1_g000011.1 /fd	ATGGGATGTAAGTCATCAGATAGTCCTAAGCCAAAGCCAAAGCACAGAAAGGGATTATGGTCACCTGAAGAAGACCAAAGGCTGAGAAACTACATTCTCAAACATGGCCATGGCTGCTGGAGTTCTGTCCCCATAAACGCTGGTTTGCAAAGGAATGGAAAGAGCTGCAGATTAAGGTGGATAAATTACTTAAGGCCAGGGTTAAAGAGAGGGACATTTACTAAACAAGAGGAGGAGACAATCCTAACCCTTCATCACATGTTAGGCAACAAGTGGTCTCAGATTGCACAACATTTGCCTGGAAGGACAGACAATGAGATAAAAAACTTCTGGCATTCTTATTTGAAGAAGAAAGTGGCCAAAGATAATGAAGATCAAGATCAAATGGAACTAGCTCAA…	MGCKSSDSPKPKPKHRKGLWSPEEDQRLRNYILKHGHGCWSSVPINAGLQRNGKSCRLRWINYLRPGLKRGTFTKQEEETILTLHHMLGNKWSQIAQHLPGRTDNEIKNFWHSYLKKKVAKDNEDQDQMELAQSKSQYTSTSSSDHNLDQPSPCSEKLTSTQIPSYNESPILVPQIDHQSQRPSPLPKILFAEWLSLDHVQGGSIGNNTGIDQHDYNPRADHGLGHSYSFNNEATFGSSGFHHGPATHEIMNSQFRYDPQDQIPGTGFADFISGGDLCSDFTLHDDVMYI
68		Rmu_sc0000730.1_g000023.1 /fd	ATGGATGTCAAACCAGGAAGGGTTTCGGACATCATTAGAAACAGTTCTGAAGAAGACGAAGATGCTATGATGATGGACCTGAGAAGAGGGCCATGGACGGTTGAGGAAGACGTTGCTCTCATGAATTACATTGCTAACCACGGCGAAGGTCGCTGGAACTCCCTTGCTCGCTGTGCAGGTTTGAAAAGAACTGGAAAGAGCTGCAGATTAAGGTGGCTCAACTATCTCCGACCCGACGTTCGACGTGGCAACATCACTCTCGAAGAACAGCTTCTCATTCTTGAGCTTCATTCTCGCTGGGGCAACCGATGGTCCAAAATTGCACAGCACTTGCCCGGAAGGACTGACAATGAAATCAAAAACTACTGGAGGACTCGCGTGCAAAAACACGCAAAGCAG…	MDVKPGRVSDIIRNSSEEDEDAMMMDLRRGPWTVEEDVALMNYIANHGEGRWNSLARCAGLKRTGKSCRLRWLNYLRPDVRRGNITLEEQLLILELHSRWGNRWSKIAQHLPGRTDNEIKNYWRTRVQKHAKQLKCDVNSKQFKDTMRYLWMPRLVERIQAAASAATAPTGASSSITAAAVNTYHFNNNNNSFQAPAGAGHVALQQATLIGNNNDLAGSYTTPENSSTAASSDSFGTQVSPVSELTDYYSNMSVNNNKPSSQALDYFQATNPHHQVGYHDSMTSPSGYSFNQGGLNSHSFQAASAPEQNNNGQWSMDGGDFSDNLWNVEESDMWFLQQQLGNI
69		Rmu_sc0002320.1_g000016.1 /fd	ATGAGGAAACCTTGCTGTGAGAAGAAGACGACCAACAAAGGAGCATGGTCGAAGCAAGAAGATGAGAAGCTCACTAAATACATTCAAAAACATGGCGAAGGAAGCTGGCGCTCTCTTCCGGTCGCTGCAGGGTTGCTTCGTTGTGGAAAGAGTTGCAGACTGAGGTGGGTAAATTATCTAAGGCCAGACCTGAAACGTGGCAACTTTGGTGAAGATGAAGAGGACCTCATCATCAAGCTCCATGCACTTCTTGGGAACAGGTGGTCACTAATTGCTGGAAGATTGCCCGGCCGGACCGACAATGAAGTGAAGAATTACTGGAATACTCATCTGAGGAGAAAGCTTATGCATTTGGGAATTGACCCCAACAACCATCGCATAGGACACAATATTTGCCTC…	MRKPCCEKKTTNKGAWSKQEDEKLTKYIQKHGEGSWRSLPVAAGLLRCGKSCRLRWVNYLRPDLKRGNFGEDEEDLIIKLHALLGNRWSLIAGRLPGRTDNEVKNYWNTHLRRKLMHLGIDPNNHRIGHNICLDKVNYPCKSANSQANNDDEDDSQDPLLDSTSSGPESNTSCTLPDLNLDLTIGLPWSL
70		Rmu_sc0004132.1_g000011.1 /fd	ATGGGAAAATCTCTTTGTTGTGATGAACCTGGACTCAAGAAAGGACCCTGGACTCCCGAAGAGGATCAAAAGCTTGTGCAGTACATCCAACAACACGGTCATGGAAGCTGGCGAGCTCTTCCCAAGCTTGCAGGTCTCAACAGATGTGGCAAGAGCTGTAGGTTGAGATGGACAAATTACTTAAGACCTGATATAAAAAGAGGCAATTTTTCTCAAGAGGAGGAGCAGACCATTCTACATCTCCATTCTATCCTCGGAAACAAGTACACACTTCTTCAACCAATTTCCTCGATCCGATCAGGTTCATTTCTGTCTCTATGCTTGGAATATCACAAACTGACTCGTCTTATTTTAACTACAAGATGGTCAGCAATTGCAACACATCTAGACGGACGAACT…	MGKSLCCDEPGLKKGPWTPEEDQKLVQYIQQHGHGSWRALPKLAGLNRCGKSCRLRWTNYLRPDIKRGNFSQEEEQTILHLHSILGNKYTLLQPISSIRSGSFLSLCLEYHKLTRLILTTRWSAIATHLDGRTDNEIKNFWNTHLKKKLIQMGIDPMTHQPRTDLFSNLQDLLQPQYQLLDQHAATTLHGAAEAVAQLVKLQYLQQQYVLQSHLLNPSVGSYAPPPIKENLPVLNSSHVVLENPSSFSQPLHYGTLEPHQDDPQVRFSTFAVPEIDEMGQGSKFTPMVSSLCQAEKNPPEIDEYCPWLLQYSSNIPTPLGSTLINNPGDASCSTSSNGGIRSSTSSSYWPELFLEETKTNYD
71		Rmu_sc0002888.1_g000030.1 /fd	ATGGGAAGAAGCTCTCGCTCCGAAAAGGAGGGAATGAAGAAAGGAGCGTGGACCGCCCGAGAAGACCAGATTCTGATAGACTACGTCAAAAAGCACGGTGAAGGCAAATGGGGAAAAATTTCAAAAGAAACAGGCCTGAAAAGATGTGGGAAGAGTGTGAGACTTAGGTGGTTGAATTATTTGAGGCCTGATATTAAGAGAGGCAACATTGCAGATGATGAAGAGGAGCTCATCATCAGGCTCCACAGACTTTTGGGCAACAGATGGTCATTGATAGCCGGAAGAATACCTGGTCGAACTGACAATGAGATTAAAAACTACTGGAATTCCACTCTAAGGAGGAAGCTACAGCAAGAAAATCACTTAAATGAGATCAAGGAGAACTCCTCATCCCCCAGC…	MGRSSRSEKEGMKKGAWTAREDQILIDYVKKHGEGKWGKISKETGLKRCGKSVRLRWLNYLRPDIKRGNIADDEEELIIRLHRLLGNRWSLIAGRIPGRTDNEIKNYWNSTLRRKLQQENHLNEIKENSSSPSGSGASEDDPHSTKNNGELGGGMVEPTSSYCFTNHNEKKEDHERCHLESTTTTTTNKTTFFSSATVEAEANKNDIELAGDDLSNDVTWNDFIMDLNEGQLDISEFLQTDFSKLCELESPMKVEVGGCSTNHELPNNWAGGRS
72		Rmu_sc0004621.1_g000001.1 /fd	ATGGGAAGACCACCTTGCTGTGACAAAGTTGGAGTGAAAAAAGGGCCATGGACGCCGGAGGAAGACATCATCTTGGTGTCGTACATTCAAGAACACGGCCCTGGGAATTGGAGATCAGTTCCTACCAACACAGGTTTGATGAGATGCAGTAAGAGCTGCCGGCTTAGATGGACTAATTATCTCCGGCCGGGCATCAAACGCGGTAACTTCACCGACCATGAGGAGAAGATGATCATCCACCTCCAAGCTCTTCTAGGCAATAGATGGGCTGCCATCGCTTCCTACCTTCCTCAGAGAACAGACAATGATATAAAGAATTACTGGAACACCCACCTGAAGAAGAAACTCAGAAAGCTCCAGACAGGTACTGCTGAAGACGGTATTTCAGGTAATTCACAG…	MGRPPCCDKVGVKKGPWTPEEDIILVSYIQEHGPGNWRSVPTNTGLMRCSKSCRLRWTNYLRPGIKRGNFTDHEEKMIIHLQALLGNRWAAIASYLPQRTDNDIKNYWNTHLKKKLRKLQTGTAEDGISGNSQQPISKGQWERRLQTDIHMAKQALCEALSLDKPSHDHHHVPDLKPSLSNINGTTSTTTRPHQASTYASNTENIARLLENWMKSSPKVRTNSSDDHQTQIHHQNMLNNGSSSSTTDGAHSGTTTTPDHHEHHGFDSLFSSFNSSTLSDNASTHLSAENNHRQTSTTTNNNNTGLMMFQDESKPDLEAAAGAAAAVDQVPLTLLEKWLFDDATAHQAHDQDMLF
73		Rmu_sc0007958.1_g000006.1 /fd	ATGGGAAGACCACCTTGCTGTGACAAAGTTGGAGTGAAAAAAGGGCCATGGACGCCGGAGGAAGACATCATCTTGGTGTCGTACATTCAAGAACACGGCCCTGGGAATTGGAGATCAGTTCCTACCAACACAGGTTTGATGAGATGCAGTAAGAGCTGCCGGCTTAGATGGACTAATTATCTCCGGCCGGGCATCAAACGCGGTAACTTCACCGACCATGAGGAGAAGATGATCATCCACCTCCAAGCTCTTCTAGGCAATAGATGGGCTGCCATCGCTTCCTACCTTCCTCAGAGAACAGACAATGATATCAAGAATTACTGGAACACCCACCTGAAGAAGAAACTCAGAAAGCTCCAGACAGGTACTGCTGAAGACGGTATTTCAGGTAATTCACAG…	MGRPPCCDKVGVKKGPWTPEEDIILVSYIQEHGPGNWRSVPTNTGLMRCSKSCRLRWTNYLRPGIKRGNFTDHEEKMIIHLQALLGNRWAAIASYLPQRTDNDIKNYWNTHLKKKLRKLQTGTAEDGISGNSQQPISKGQWERRLQTDIHMAKQALCEALSLDKPSHDHHHVPDLKPSLSNINGTTSTTTRPHQASTYASNTENIARLLENWMKSSPKVRTNSSDDHQTQIHHQNMLNNGSSSSTTDGAHSGTTTTPDHHEHHGFDSLFSSFNSSTLSDNASTHLSAENNHRQTSTTTNNNNTGLMMFQDESKPDLEAAAGAAAAVDQVPLTLLEKWLFDDATAHQAHDQDMLF
74		Rmu_sc0002416.1_g000020.1 /fd	ATGGGCAGACCTCCTTGCTGTGACAAAGAAGGTGTCAAGAAAGGACCTTGGACTCCTGAAGAGGACATCATTTTAGTCTCTTACATTCAAGAACATGGTCCTGGAAATTGGAGGGCTGTTCCTACCAATACTGGTTTGCTTAGATGTAGCAAGAGTTGCAGGCTTAGATGGACTAACTACCTTAGGCCTGGGATCAAACGTGGGAACTTCACTGACCATGAGGAGAAGATGATCATCCATCTTCAAGCTCTTTTGGGCAATAGATGGGCTGCAATAGCCTCATACCTCCCTCAGAGAACTGACAATGATATTAAGAATTACTGGAACACCCACTTGAAGAAGAAGCTGAACAAGCTCACCCAAATTGGTGGTCACTCAAAAGATGAGGGATTCACTAGT…	MGRPPCCDKEGVKKGPWTPEEDIILVSYIQEHGPGNWRAVPTNTGLLRCSKSCRLRWTNYLRPGIKRGNFTDHEEKMIIHLQALLGNRWAAIASYLPQRTDNDIKNYWNTHLKKKLNKLTQIGGHSKDEGFTSSCSQQATIARGQWERRLQTDIHTARQALREALSPAENYKPDGFASSVSLSSTSTTTSTDLKPSMDIVPAGQSDQSPSTTLSTTYASSTENISRLLKGWMKNPPKSAKTGTTAAAGVIDSTSSNEEATLSAANTTTTTSTTGHGSIQLSNAFESLFGFECSLEASNSDLSPTMSPDQGSLFQAESKPDVDQDQMPLSLLEKWLFDEAAVIHGKEVHFSDFIALDGENANFF
75		Rmu_ssc0000368.1_g000058.1 /fd	ATGGGAAGGGCTCCTTGTTGTTCAAAGGTTGGTTTGCACAGAGGTCCATGGACTCCCAGAGAGGACACATTACTCACCAAATATATTGAAGCTCATGGTGAAGGCCATTGGAGATCCTTGCCCAAAAAAGCCGGCCTCCTTAGGTGTGGGAAGAGTTGCAGGCTAAGATGGATGAACTACCTAAGGCCAGATATCAAGAGAGGAAACATTACTCCAGACGAAGATGACCTAATTATCCGACTGCATTCACTTCTCGGAAACCGCTGGTCTCTCATCGCCGGTAGACTTCCGGGTCGAACCGATAACGAGATCAAGAACTATTGGAACACCCATCTCAGCAAAAGGCTCATGAGCGAAGGAACTGACCCTAACACGCACCAAAAACTATCCCAGCCTCCT…	MGRAPCCSKVGLHRGPWTPREDTLLTKYIEAHGEGHWRSLPKKAGLLRCGKSCRLRWMNYLRPDIKRGNITPDEDDLIIRLHSLLGNRWSLIAGRLPGRTDNEIKNYWNTHLSKRLMSEGTDPNTHQKLSQPPAPKENKRKKKQNHKAKNKNNTEDRIVPQKPKVHLPKPTRVTSFVNLPRNDSFTTASTTVSSSQDQVLDHVNNIIPWSDFKEGGVVFSVIDGSSSDFECDQSRIILNVVAGDDEGHNLENIYEEYLQALLKTTDQDQNCQVELDSFAESLLI
76		Rmu_sc0009869.1_g000002.1 /fd	ATGGTGAGAACTCCTTGCTGTGATGAAAGGGGAGTGAAGAAAGGTACATGGACTCCGGAGGAAGATAGGAAGCTCATAGCTTATGTTACTAGGTATGGCTGCTGGAATTGGCGCCAACTCTCCAAGTTTGCTGGGCTTTCAAGGTGTGGGAAGAGTTGCAGGCTGAGGTGGCTGAATTACTTGAGGCCGAACATCAAGAGAGGAAACTACACCAATGAAGAAGAGGAAATAATAATCAGGCTTCACGAAAAGCTGGGGAACAAATGGTCTGCGATTGCGGCACAGCTTCAGGGAAGAACTGACAATGAGGTTAAGAATCACTGGCACACAAACCTCAAGAAACGTTTAATGATGAACAAGCACAAGGCGTCCTCAGTTTCAATAACACATGATGATCAT…	MVRTPCCDERGVKKGTWTPEEDRKLIAYVTRYGCWNWRQLSKFAGLSRCGKSCRLRWLNYLRPNIKRGNYTNEEEEIIIRLHEKLGNKWSAIAAQLQGRTDNEVKNHWHTNLKKRLMMNKHKASSVSITHDDHHEEVVPKSSDQPKTTATADFANAETTVDQIPQIDCFDYPELWSPQPSSSVVSSMTTDTAVAITAADGLVVVDNATSAAMETIYGDNFWTEPFLADNSYNPTGFYTPLMEPEFLYPSFDGAI
77		Rmu_sc0004030.1_g000007.1 /fd	ATGGGAAGAGCTCCTTGCTGTGACAAGAATGGACTCAAGAAAGGTCCATGGACTTCTGAAGAAGATGTTGTTCTCGTCAACTATATTCAGGAACATGGTCCAGGCAATTGGCGTAACCTCCCAAAGAACGCAGGACTCCAAAGATGTGGCAAGAGTTGCCGGCTTAGATGGACTAACTACCTGAGGCCTGATATAAAGAGAGGAAGATTTTCCTTCGAAGAAGAAGAGACTATAATCCAACTGCACAGCATCCTCGGCAACAAGTGGTCAGCTATTGCAGCTCGCCTGCCAGGAAGAACTGACAACGAAATCAAGAACTACTGGAACACACACATCCGAAAAAGGCTTCTCCGAATGGGAATCGATCCAGTCACTCACGCTCCACGCATCGATCTTCTT…	MGRAPCCDKNGLKKGPWTSEEDVVLVNYIQEHGPGNWRNLPKNAGLQRCGKSCRLRWTNYLRPDIKRGRFSFEEEETIIQLHSILGNKWSAIAARLPGRTDNEIKNYWNTHIRKRLLRMGIDPVTHAPRIDLLDLSSILGSYVSNINPAAALLNLSNLLGTQQALNVNPELLRLVTTLSSLKQGNQQMFSQNQNQVCNISQDLQNQLVPSLQSNPQFQNLFQDDFSPDMANLKQLMQMINTEGNLPNMSNFSSPASYSQENIVPNSNFGPETVVSNLPSYVPSSTSNSTVPELAGNSFFQLPLNNSNVNHDFGFDSVLSTPHSSPTTLNSSGTYNNINSSSTEDERDLESYCSNLLKFEIPDSTLDINDYM
78		Rmu_sc0010382.1_g000002.1 /fd	ATGGGAAGAGCTCCTTGCTGTGACAAGAATGGACTCAAGAAAGGTCCATGGACTTCTGAAGAAGATGTTGTTCTCGTCAACTATATTCAGGAACATGGTCCAGGCAATTGGCGTAACCTCCCAAAGAACGCAGGACTCCAAAGATGTGGCAAGAGTTGCCGGCTTAGATGGACTAACTACCTGAGGCCTGATATAAAGAGAGGAAGATTTTCCTTCGAAGAAGAAGAGACTATAATCCAACTGCACAGCATCCTCGGCAACAAGTGGTCAGCTATTGCAGCTCGCCTGCCAGGAAGAACTGACAACGAAATCAAGAACTACTGGAACACACACATCCGAAAAAGGCTTCTCCGAATGGGAATCGATCCAGTCACTCACGCTCCACGCATCGATCTTCTT…	MGRAPCCDKNGLKKGPWTSEEDVVLVNYIQEHGPGNWRNLPKNAGLQRCGKSCRLRWTNYLRPDIKRGRFSFEEEETIIQLHSILGNKWSAIAARLPGRTDNEIKNYWNTHIRKRLLRMGIDPVTHAPRIDLLDLSSILGSYVSNINPAAALLNLSNLLGTQQALNVNPELLRLVTTLSSLKQGNQQMFSQNQNQVCNISQDLQNQLVPSLQSNPQFQNLFQDDFSPDMANLKQLMQMINTEGNLPNMSNFSSPASYSQENIVPNSNFGPETVVSNLPSYVPSSTSNSTVPELAGNSFFQLPLNNSNVNHDFGFDSVLSTPHSSPTTLNSSGTYNNINSSSTEDERDLESYCSNLLKFEIPDSTLDINDYM
79		Rmu_sc0003120.1_g000001.1 /fd	ATGGGTAGAGGTCCTCGGTGTTCTAAGGATGGACTCAACAAAGGGGCTTGGATGGCAGCCGAAGACAAATTGCTCTTGGATTACATCAAGAACCACGGTGAAGGCAAATGGAGCAATGTTGCCAAAGAAACAGGTCTTAAGAGATGCGGGAAGAGCTGCCGGCTTCGGTGGATGAACTATCTGAGACCAGATATTAAGAGAGGCAGCATTTCAGATGATGAAGAAGAGCTAATCATCAGACTCCATAAGCTCCTGGGCAACAGATGGTCTCTGATAGCAGGAAGACTTCCCGGGCGAACAGACAATGAAATCAAGAATTACTGGAACTCCAACTTAGCCAAGAAAATGGCACAAGCTCAAAGTTCACCTCAGTCCAAATGCAATAATGTCATTGTCCAG…	MGRGPRCSKDGLNKGAWMAAEDKLLLDYIKNHGEGKWSNVAKETGLKRCGKSCRLRWMNYLRPDIKRGSISDDEEELIIRLHKLLGNRWSLIAGRLPGRTDNEIKNYWNSNLAKKMAQAQSSPQSKCNNVIVQQTPDQVQPQPQQQCSRVSTVVPPRPPTSTTAAASPLHHRTLDDFCNNVAINNTNNLIKAVNSVDSRISSEDVSLSTTTTTNTTSDGDDQLGSSPTNFMMDFNTDDHEDFCKILDCDFANLNNAIDGDDEHQGSPVLVLPKQMMDKNIQAADFGSLASFLESDEDWLGNDLNVMLS
80		Rmu_sc0001634.1_g000020.1 /fd	ATGGGGAGGCATTCTTGTTGCTACAAGCAGAAGCTTAGGAAAGGCCTCTGGTCTCCTGAAGAAGATGAGAAGCTTCTCAATTACATCACTAAGCATGGCCATGGCTGTTGGAGCTCAGTCCCCAAGCTTGCAGGCCTACAAAGATGTGGGAAGAGCTGCAGGTTGAGGTGGATAAACTACCTGAGGCCTGATTTGAAGAGAGGTCCATTCTCACAGCAAGAAGAGAATTTGATAATTGAGCTTCACGCAGTTCTGGGCAACAGGTGGTCTCAGATTGCGGCTCAATTACCCGGAAGGACCGACAATGAGATCAAGAATCTATGGAATTCCTGCATTAAGAAGAAGCTGCGGCAAAGAGGCATTGACCCCAACACTCACAAACCAATCTCAGCAGAAACT…	MGRHSCCYKQKLRKGLWSPEEDEKLLNYITKHGHGCWSSVPKLAGLQRCGKSCRLRWINYLRPDLKRGPFSQQEENLIIELHAVLGNRWSQIAAQLPGRTDNEIKNLWNSCIKKKLRQRGIDPNTHKPISAETEQNDHSKEISQLSPTNYKSNEQQKASVGSNELNLVEAVANSKQPENHRYPVEVSSSSQVISNRNSTQEFFIDRAACSSHEGSTTTNCRPSDFVGYFSFQHHHQSNFGSSSDTMGLNAVNPNPTFSFLNQNSRSNSDPQMVSEFSTSMSTPPTLLPSMSSGSLFGTRVKPSISLPSDNSSTVSWDQSSAGYSNNGGFDSTAAAFSWGLMPEVPVKSDDVEEINKWSEYLHSPFLMGANTMQNINQSSPYNSTEIKPETQYFMTNNGS…
81		Rmu_sc0017810.1_g000002.1 /fd	ATGGGTGGTATTCCCTGGACTAAGGAAGAGGATCAGTTGCTGAGGAAATGCATAGAGAAGTATGGAGAAGGCAAGTGGCATCGAATTCCTCACTTAGCCGGTCTAAACAGGTGCCGTAAGAGCTGCAGGCTTCGGTGGCTAAACTACCTTCGGCCGAACATCAAGAGAGGGAGCTTTGAACAAGAGGAAGTTGAGCTCATCATCCAGCTCCAAAGGCTCTTGGGAAACAGGTGGTCATTAGTTGCAGCTAGGCTTCCGGGGAGGACTGGTAATGATGTGAAGAACTATTGGAATTGTCACTTGAGCAAAAAGCTAAATGCTCAAGAAACTCATGGTGATCATCAGAAGATTAATCATGCAGGGAATAATAATTTACAAGTCATAAGACCCCAAGCTTCA…	MGGIPWTKEEDQLLRKCIEKYGEGKWHRIPHLAGLNRCRKSCRLRWLNYLRPNIKRGSFEQEEVELIIQLQRLLGNRWSLVAARLPGRTGNDVKNYWNCHLSKKLNAQETHGDHQKINHAGNNNLQVIRPQASKYASSNSKRSMISSTLEDQTCQALEECSNASVAMLCNIDKDQGQISQIVEREDSNNLCVEEEHEGNNEFMGDLGMVDLDQFEQVIEQYDQEFNNKNKKWEWDDSILDMDLWVTDSS
82		Rmu_co8442277.1_g000001.1 /partial/fd	AGCTGCACCCAAAACAGCAGCAGTATCGTCTTCCTCGAGCAAGACGCCGTGCTGCGTCAAGGTGGGTCTGAAGAGAGGTCCCTGGACTCCCGAGGAAGATGAGCTCTTAGCTAATTACATCAAGAAAGAAGGCGAGGGCCGGTGGAGAACCCTCCCGAAGCGCGCCGGCCTCCTCCGCTGCGGCAAGAGCTGCCGTCTCCGCTGGATGAACTACCTCCGACCTTCCGTCAAGCGGGGCCAGATCGCCGCAGATGAAGAAGATCTCATCCTCCGCCTCCACCGCCTCCTCGGCAATAGATGGTCTCTGATAGCTGGGAGGATTCCGGGGCGTACAGACAATGAGATAAAGAACTACTGGAACACTCACCTGAGCAAAAAGCTGATCAGTCAGGGCATAGA…	AAPKTAAVSSSSSKTPCCVKVGLKRGPWTPEEDELLANYIKKEGEGRWRTLPKRAGLLRCGKSCRLRWMNYLRPSVKRGQIAADEEDLILRLHRLLGNRWSLIAGRIPGRTDNEIKNYWNTHLSKKLISQGIDPRTHKPLNPDTSSADHAAVNNNGAAASSSKTNQHRGGTSSNPSPKSPITSSSPEEAAPSARENGYHVTNDDDLGAIVHGANGYGNVMTSNDSNGSAAGMGGLRSNLLIGNEEDEDMNCCTDDVFSSFLNSLINEDPFAAAAAGQHHSQPLQGMQHPNGIAPPADSSAQAFGGWESAVLMSSSFIQNDSHRVNVDQTQ
83		Rmu_co8499051.1_g000001.1 /fd	ATGGAAAACAAAAGACTGAAAGCTTTGCAGCCAGAGCAACCAAATAGTTGGAACAAGAAGAACTTGTGGAGGCCAGAGGAGGACTTGATTTTGAAGAAGTACGTGGAGACTCATGGTGAAGGAAACTGGGCAACTGTTTCCAAGCGATCAGGTTTGAATCGGAATGGAAAGAGCTGTAGGCTAAGATGGAAGAACTACTTGAGACCCAACATCAAACGTGGAGACATGTCCCAGGAGGAGGAAGACCTCATTATCCGAATGCATAAGCTTCTTGGCAACCGTTGGTCACTGATTGCTGGTCGGCTTCCTGGTCGAACGGATAATGAAGTGAAGAACTACTGGAATACCCATTTGAACAAGAACAACACCCCCTGCTACTGCCCCGCACCGGCACCTGGA…	MENKRLKALQPEQPNSWNKKNLWRPEEDLILKKYVETHGEGNWATVSKRSGLNRNGKSCRLRWKNYLRPNIKRGDMSQEEEDLIIRMHKLLGNRWSLIAGRLPGRTDNEVKNYWNTHLNKNNTPCYCPAPAPGGRRGRKRKTNDHDHYSDDTHHHQDNCQCSNKRSKIISSTETTKTESITREEEPKYGISSKEDDQSSSSIMSTMTATSYPYWMVDYSSNTDQSLNFDYADIDHQYSPSSSWVQYYLPTTTNNNATSSSTFVFDDEPFIAYMDSFLLLEAAFGCTSAATATSEGMQSSVMMPLSSANDPHSPHF
84		Rmu_sc0021871.1_g000004.1 /fd	ATGGAAAACAAAAGACTGAAAGCTCTGCAGCCAGAGCAACCAAATAGTTGGAACAAGAAGAACTTGTGGAGGCCAGAGGAGGACTTGATTTTGAAGAAGTACGTGGAGACTCATGGTGAAGGAAACTGGGCAACTGTTTCCAAGCGATCAGGTTTGAATCGGAATGGAAAGAGCTGTAGGCTAAGATGGAAGAACTACTTGAGACCCAACATCAAACGTGGAGACATGTCCCAGGAGGAGGAAGACCTCATTATCCGAATGCATAAGCTTCTTGGCAACCGTTGGTCACTGATTGCTGGTCGGCTTCCTGGTCGAACGGATAATGAAGTGAAGAACTACTGGAATACCCATTTGAACAAGAACAACACCCCCTGCTACTGCCCCGCACCGGCACCTGGA…	MENKRLKALQPEQPNSWNKKNLWRPEEDLILKKYVETHGEGNWATVSKRSGLNRNGKSCRLRWKNYLRPNIKRGDMSQEEEDLIIRMHKLLGNRWSLIAGRLPGRTDNEVKNYWNTHLNKNNTPCYCPAPAPGGRRGRKRKTNDHDHYSDDTHHHQDNCQCSNKRSKIISSTETTKTESITREEEPKYGISSKEDDQSSSSIMSTMTATSYPYWMVDYSSNTDQSLNFDYADIDHQYSPSSSWVQYYLPTTTNNNATSSSTFVFDDEPFIAYMDSFLLLEAAFGCTSAATATSEGMQSSVMMPLSSANDPHSPHF
85		Rmu_co8261837.1_g000001.1 /partial/fd	GAAGAGGACGACTTGCTGAGGAAGCTGGTGCAGCGGCACGGCGCTCGGAACTGGACGCTGATAAGCAAGTCGATTCCCGGCCGGTCCGGCAAGTCGTGCCGGCTTCGGTGGTGCAATCAGCTCTCGCCGGAGGTGGAGCACCGGGCGTTCACGGCGGAGGAGGACAATATTATCGCGGCGGCGCATTCCAAGTTCGGCAACAAGTGGGCCACCATAGCCAGGCTCCTCAACGGCCGTACGGACAATGCGATCAAGAACCACTGGAACTCCACTCTGAAGCGGAAGTACTCGTCCATGGCGGAAGACGGCGTCTTCGGCGGAGGCGGTTCGATCGAGGAGCATCATCACCACCACCACCTCAGGCCGGAGAAGAAATCTGCGACGGTTTCGGTGTCTGGC…	EEDDLLRKLVQRHGARNWTLISKSIPGRSGKSCRLRWCNQLSPEVEHRAFTAEEDNIIAAAHSKFGNKWATIARLLNGRTDNAIKNHWNSTLKRKYSSMAEDGVFGGGGSIEEHHHHHHLRPEKKSATVSVSGRGYSPTSPSGSDVSDSGVVPAVSSAQVFRPVARAVLRTESPSSQNEMIHNEPEPSTLLTLSLPGGYSTELATRREERTTSLQQQQKEAENENRTMSFGPEFMSFMQEMIRREVRNYMDDMNGQHFGIPKLS
86		Rmu_ssc0000196.1_g000010.1 /fd	ATGGTGAGAACTCCTTGCTGTGATGAAAGGGGAATGAAGAAAGGTACATGGACTCCGGAGGAAGATAGGAAGCTCATAGCTTATGTTACTAGGTATGGCTGCTGGAATTGGCGCCAACTTCCCAAGTTTGCTGGGCTTTCAAGGTGTGGGAAGAGTTGCAGGCTGAGGTGGCTGAATTACTTGAGGCCGAACATCAAGAGAGGAAACTACACCAGTGAAGAAGAGGAAATAATAATCAGACTTCACGAAAAGCTGGGGAACAAATGGTCTGCGATTGCGGCACAGCTTCAGGGAAGAACTGACAATGAGGTTAAGAATCACTGGCACACAAACCTCAAGAAACGCTTAATGATGAACAAGCACAGGGCCTCCTCAGTTTCAATCACACACGATGATCAT…	MVRTPCCDERGMKKGTWTPEEDRKLIAYVTRYGCWNWRQLPKFAGLSRCGKSCRLRWLNYLRPNIKRGNYTSEEEEIIIRLHEKLGNKWSAIAAQLQGRTDNEVKNHWHTNLKKRLMMNKHRASSVSITHDDHHEEVVPKSSDQPKTTAPADFANAETTVDQIPQIDYLDYPELWSPQPSSSEVSSMTSDTAVAITAADGLVVEDNATSAAMGTIYGDFGDNFWTEPFLADNSYNTSGFYTPLMEPEFLYPPFDGDFLYGAT
87		Rmu_sc0011792.1_g000005.1 /fd	ATGAGGAACCCATCTTCGACCTCATCTTCCTCCAAAGGAAAATCATCATCATCAGCAGCAGCAGCAGCTGCACCCAAAACAGCAGCAGTATCGTCTTCCTCGAGCAAGACGCCGTGCTGCGTCAAGGTGGGTCTGAAGAGAGGTCCCTGGACTCCCGAGGAAGATGAGCTCTTAGCTAATTACATCAAGAAAGAAGGCGAGGGCCGGTGGAGAACCCTCCCGAAGCGCGCCGGCCTCCTCCGCTGCGGCAAGAGCTGCCGTCTCCGCTGGATGAACTACCTCCGACCTTCCGTCAAGCGGGGCCAGATCGCCGCAGATGAAGAAGATCTCATCCTCCGCCTCCACCGCCTCCTCGGCAATAGATGGTCTCTGATAGCTGGGAGGATTCCGGGGCGTACA…	MRNPSSTSSSSKGKSSSSAAAAAAPKTAAVSSSSSKTPCCVKVGLKRGPWTPEEDELLANYIKKEGEGRWRTLPKRAGLLRCGKSCRLRWMNYLRPSVKRGQIAADEEDLILRLHRLLGNRWSLIAGRIPGRTDNEIKNYWNTHLSKKLISQGIDPRTHKPLNPDTSSADHAAVNNNGAAASSSKTNQHRGGTSSNPSPKSPITSSSPEEAAPSARENGYHVTNDDDLGAIVHGANGYGNVMTSNDSNGSAAGMGGLRSNLLIGNEEDEDMNCCTDDVFSSFLNSLINEDPFAAAAAGQHHSQPLQGMQHPNGIAPPADSSAQAFGGWESAVLMSSSFIQNDSHRVNVDQTQ
88		Rmu_sc0005750.1_g000003.1 /fd	ATGGGAAGGCCTCCTTGCTGTGAGAAGGTTGGCATCAAGAAAGGTCCATGGACACCTGAAGAGGATATCATTCTTGTTTCTTACATCCAAGAACATGGTCCAGGCAATTGGAGAGCAGTGCCAGCCAACACTGGGTTGTTGAGGTGCAGCAAGAGTTGCAGGCTTAGATGGACTAACTATCTCAGACCTGGAATCAAGAGAGGGAACTTCACACCTCATGAAGAAGGGATGATAATTCATTTGCAAGCTTTATTGGGTAACAAATGGGCAGCTATAGCTTCTTACCTCCCACAAAGAACAGACAATGATATAAAGAATTACTGGAACACCCACTTGAAGAAGAAGCTCAAGAAGATTCAGTCAGCTGTTGATCATCATCATCAGCAGCAACCTCAGGCT…	MGRPPCCEKVGIKKGPWTPEEDIILVSYIQEHGPGNWRAVPANTGLLRCSKSCRLRWTNYLRPGIKRGNFTPHEEGMIIHLQALLGNKWAAIASYLPQRTDNDIKNYWNTHLKKKLKKIQSAVDHHHQQQPQAQNNILGSSISDSTTSNSTHHQYPHRNNVNDITSHASTTTLSLRSINQSSSSGGIYASSTENISRLLEGWMRTSPKSTNANLVTKPSHDREENPKGGQDQDEGCDHDLLSHEAFESILSFDNLNNVNAASWDRSSTTNCDSSSIKQVSQTQCSTAAAIANEKDKHIIRACESTNTPPLSFLEKWLLDESAAGQVLEDRMMELSPISLV
89		Rmu_sc0038059.1_g000001.1 /fd	ATGGGAAGGCCTCCTTGCTGTGAGAAGGTTGGCATCAAGAAAGGTCCATGGACACCTGAAGAGGATATCATTCTTGTTTCTTACATCCAAGAACATGGTCCAGGCAATTGGAGAGCAGTGCCAGCCAACACTGGGTTGTTGAGGTGCAGCAAGAGTTGCAGGCTTAGATGGACTAACTATCTCAGACCTGGAATCAAGAGAGGGAACTTCACACCTCATGAAGAAGGGATGATAATTCATTTGCAAGCTTTATTGGGTAACAAATGGGCAGCTATAGCTTCTTACCTCCCACAAAGAACAGACAATGATATAAAGAATTACTGGAACACCCACTTGAAGAAGAAGCTCAAGAAGATTCAGTCAGCTGTTGATCATCATCATCAGCAGCAACCTCAGGCT…	MGRPPCCEKVGIKKGPWTPEEDIILVSYIQEHGPGNWRAVPANTGLLRCSKSCRLRWTNYLRPGIKRGNFTPHEEGMIIHLQALLGNKWAAIASYLPQRTDNDIKNYWNTHLKKKLKKIQSAVDHHHQQQPQAQNNILGSSISDSTTSNSTHHQYPHRNNVNDITSHASTTTLSLRSINQSSSSGGIYASSTENISRLLEGWMRTSPKSTNANLVTKPSHDREENPKGGQDQDEGCDHDLLSHEAFESILSFDNLNNVNAASWDRSSTTNCDSSSIKQVSQTQCSTAAAIANEKDKHIIRACESTNTPPLSFLEKWLLDESAAGQVLEDRMMELSPISLV
90		Rmu_sc0003470.1_g000020.1 /pd	ATGGATGTTGATCAGTACTTACTGAGAGGTTATACTTCATCTGTAACTCATGAGTTACCAAGCTGTGATCCAGAAGATGATCTGCGAAAAGGGCCATGGACAGTTGAGGAAGACTCCATTCTCATGGAGTATATCAACACTCACGGCGAGGGCCGGTGGAATTCACTGGCCGGAAACTCGGGCCTGAAACGAAGTGGCAAAAGCTGCAGACTGAGATGGTTGAACTACTTGCGCCCAAATGTTCGACGTGGAAATATCACCCTCCAAGAACAGCTTCTGATTCTTCAACTTCATTCTCGCTGGGGCAACAGGTGGTCGAAGATAGCGGAATACTTGCCGGGAAGAACAGACAATGAGATAAAAAACTACTGGAGAACAAGAGTCCAAAAGCAAGCAAAG…	MDVDQYLLRGYTSSVTHELPSCDPEDDLRKGPWTVEEDSILMEYINTHGEGRWNSLAGNSGLKRSGKSCRLRWLNYLRPNVRRGNITLQEQLLILQLHSRWGNRWSKIAEYLPGRTDNEIKNYWRTRVQKQAKQLNCDVNSKQFQDAMHDYCLTDHSNTAAAGSSHYWIDPNYLPEASATSSGSTELQDCLNIPEPTSTEFSELNCYPMNGQYYSSTNWSAQHPASPPHCPAPVRTPTACSHTHSVLAPSAHPPPSIAAATAHSARLPTTVAQPLERRWPDHS
91		Rmu_co8433021.1_g000001.1 /partial/fd	ATGGTGAGGAGTAGTACTCAGCAGTGTGAAGAGAAGAGACCTTTGAAGAAAGGGCCATGGAGTCCTGATGAGGATCATAAGTTGATAGCTTACATTCAAAGATATGGTATTTGGAATTGGAGTCAGATGCCTAAACCTGCCGGTCTGGCAAGGTCTGGGAAAAGTTGTAGACTTCGTTGGATGAATTACTTGAGGCCGGATATTAAGCGCGGAAACTTCAGCAAGGAAGAAGAGGAGACCATAATCAAGTTGCAACAGAATATGGGAAACAGATGGTCTGTAATTGCAGCAAAACTTCCTGGAAGAACTGACAATGAAATCAAGAATTACTGGCACACCCACTTGAAAAGGCACCTCAACAATGACAAAGCCAAAAGCGGCGAGAATACTTCATCTGAA…	MVRSSTQQCEEKRPLKKGPWSPDEDHKLIAYIQRYGIWNWSQMPKPAGLARSGKSCRLRWMNYLRPDIKRGNFSKEEEETIIKLQQNMGNRWSVIAAKLPGRTDNEIKNYWHTHLKRHLNNDKAKSGENTSSETETFLLDKEAPKASETSRENFSSSSSGIADEVYHKPQIPEQQSICETF
92		Rmu_sc0000501.1_g000017.1 /pd	ATGGATGTTGATCAGTACTTACTGAGAGGTTATACTTCATCTGTAACTCATGAGTTACCAAGCTGTGATCCAGAAGATGATCTGCGAAAAGGGCCATGGACAGTTGAGGAAGACTCCATTCTCATGGAGTATATCAACACTCACGGCGAGGGCCGGTGGAATTCACTGGCCGGAAACTCGGGCCTGAAACGAAGCGGCAAAAGCTGCAGACTGAGATGGTTGAACTACTTGCGCCCAAATGTTCGACGTGGAAATATCACCCTCCAAGAACAGCTTCTGATTCTTCAACTTCATTCTCGCTGGGGCAACAGGTGGTCGAAGATAGCGGAATACTTGCCGGGAAGAACAGACAATGAGATAAAAAACTACTGGAGAACAAGAGTCCAAAAGCAAGCAAAG…	MDVDQYLLRGYTSSVTHELPSCDPEDDLRKGPWTVEEDSILMEYINTHGEGRWNSLAGNSGLKRSGKSCRLRWLNYLRPNVRRGNITLQEQLLILQLHSRWGNRWSKIAEYLPGRTDNEIKNYWRTRVQKQAKQLNCDVNSKQFQDAMRYVWIPRLMERIRASSDSTVLSGQPTETTTSPAFTPPDDYCLTNHSNTAAAGSSHYWIDPNYLPEASATSSGSTELQDCLNIPEPTSTEFSELNCYPMNGQYYSSTNWSGCYQDGSEIQGSEQIESSNSWSTPGGDLVENLWNEENIWFLQQQLNSD
93		Rmu_sc0016972.1_g000001.1 /fd	ATGTCGATAAATACGGGCCATAACTGTTGCAGCAAACAGAAAGTGAAAAGAGGACTATGGTCTCCTGAAGAAGATGAGAAGCTAATGAATCACATACACAACTCTGGCCATGGTTCCTGGAGCTCTATACCAAAAATAGCTGGTTTGGAGAGGTGTGGGAAGAGTTGCAGGTTGAGGTGGATAAACTACTTGAGGCCAGATCTGAAGAGGGGTTCATTTTCTGAGCAAGAAGAGAGAATCATCATAGATGTTCATAGGGTTGTAGGCAACAGGTGGGCTCAGATAGCCAAGCAAATGCCAGGAAGAACAGACAACGAGGTCAAGAATTTCTGGAACTCATGCATCAAGAAGAAACTCATCTCTCAAGGTCTGGATCCCAACACTCACAATCTTATCATC…	MSINTGHNCCSKQKVKRGLWSPEEDEKLMNHIHNSGHGSWSSIPKIAGLERCGKSCRLRWINYLRPDLKRGSFSEQEERIIIDVHRVVGNRWAQIAKQMPGRTDNEVKNFWNSCIKKKLISQGLDPNTHNLIIPAASDSKSSHDSSSLHGSSSSTIPTYLYQSPNMVWTDHFQEQYPRGSQPSMEKSKVQTISSFSHHSYPSELDIIIENCKTWGTGSSIESTTAEPAEMEYMSMKAEQKEESCEVQTENGSCSVLNYNGRQTSMDASSFGSCNLSNFDFVESTLVPCEMDYHLRPIMDQLGCYRN
94		Rmu_sc0001865.1_g000006.1 /fd	ATGGGGAGGGCTCCGTGCTGCGAGAAAGTTGGGCTGAAGAAGGGGAGATGGACGGCAGAGGAGGATCAAACCTTAATCAACTACATCCATGCTAATGGGGAAGGCTCCTGGAGATCATTGCCCAAGAATGCAGGGTTACTGCGGTGTGGGAAGAGTTGCAGACTGAGATGGATAAACTATCTGAGAACTGACTTAAAGAGGGGAAATATTACTCCTCAAGAGGAAGATATCATCATCAAATTGCATGCTTCTCTGGGAAATAGGTGGTCTTTGATAGCTAGTCAATTACCAGGAAGAACAGACAATGAGATAAAGAACTACTGGAACTCGCACTTGAGTCGAAAAATCGACACTTTCAGGAGACCTCTTAATATGATGCATATGGCTACAGCAGCGGCA…	MGRAPCCEKVGLKKGRWTAEEDQTLINYIHANGEGSWRSLPKNAGLLRCGKSCRLRWINYLRTDLKRGNITPQEEDIIIKLHASLGNRWSLIASQLPGRTDNEIKNYWNSHLSRKIDTFRRPLNMMHMATAAAASSSSGSSTAAAGVQMNMAMKLGPPTSKRRGRGGRTSRWAMKKNKISYASTGINHHLDCTHKDDGSATVTSSSSINMCPPPPPSAAAVAAGIGQKETQNLGGGGPSDCSEGKIDGGGEVAFNDLMMDAVNETILDPAGALTLSGERQSDDGDIMGVIRDEDTGKLLCGPNKVMTTCTAAASHEEEHQLDQISATNLSSSSHSNSKSSYYGEAEAAAFDGEDWYNSCSNYSAGSAAATCNFDQQKQQYDGMNGTLDDEMRWNWESDI…
95		Rmu_sc0016737.1_g000015.1 /fd	ATGGGAAGATCAGCATGTTGTGATGAAAATGGATTAAAGAAAGGGCCGTGGACAGCAGAAGAAGATGAAAAGCTGGTGGAGTACATGGAGAGGTGCGGTGGCGATGGGAATCATCATCGCGGTGGAATTAGTTGGAGACAAGTGCCAAAGCTTGCAGGTTTGAAGAGGTGTGGAAAGAGCTGCAGGCTACGATGGACCAACTATCTGAGGTCTGATATCAAGAGGGGAAACTTCTCCCACCAAGAAGAGCAAACCATCATCAATCTCCACAAACTGCTAGGAAACAAATGGTCAGAGATAGCAAGCAACCTTCCGGGAAGGACTGATAACGAAATCAAGAACTTCTGGAACACCCATTTAAAGAAGAAACTGCTCCAAATGGGAATCGACCCCGTCACC…	MGRSACCDENGLKKGPWTAEEDEKLVEYMERCGGDGNHHRGGISWRQVPKLAGLKRCGKSCRLRWTNYLRSDIKRGNFSHQEEQTIINLHKLLGNKWSEIASNLPGRTDNEIKNFWNTHLKKKLLQMGIDPVTHTPISATHDHLSAIAASTSFSTCDWALLQYLNSKIQVLQNNILQGQGLLISNNAGPNAYDQYRSCVLGMDMEAAAVNYYNNYVLGSSPSRSCSVPDQQLLYHHGHGLGYDYDDLTSATMMNRHSSCLQGTSFGTSEYDHHDSKFAIPNMKVPFSTDDHHHKLQYGEGGHHDHQLPVLVSAATSAYVTITHDTTAANDQFATPYIPHQFSNSTHSSTTTTTTITTSSTATFEIDHEVACAGRDLIVMDDYHQEATNNDQSYWKHIME
96		Rmu_sc0013987.1_g000006.1 /fd	ATGGGAAGATCAGCATGTTGTGATGAAAATGGATTAAAGAAAGGGCCGTGGACAGCAGAAGAAGATGAAAAGCTGGTGGAGTACATGGAGAGGTGCGGTGGCGATGGGAATCATCATCGCGGCGGAATTAGTTGGAGACAAGTGCCAAAGCTTGCAGGTTTGAAGAGGTGTGGAAAGAGCTGCAGGCTACGATGGACCAACTATCTGAGGCCTGATATCAAGAGGGGAAACTTCTCCCACCAAGAAGAGCAAACCATCATCAATCTCCATAAACTGCTCGGAAACAAATGGTCCGAGATAGCAAGCAACCTTCCGGGAAGGACTGATAACGAAATCAAGAACTTCTGGAACACCCATTTAAAGAAGAAACTGCTCCAAATGGGAATCGACCCCGTCACC…	MGRSACCDENGLKKGPWTAEEDEKLVEYMERCGGDGNHHRGGISWRQVPKLAGLKRCGKSCRLRWTNYLRPDIKRGNFSHQEEQTIINLHKLLGNKWSEIASNLPGRTDNEIKNFWNTHLKKKLLQMGIDPVTHTPISATHDHVSAIAASTSFSPCDWALLQYLNSKIQVLQNNILQGQGLLISNNAGPNAYDQYRSCVLGMDMEAAAVNYYNNYVLGSSPSRSCSVPDQQLLYHHGHGLGYDYDDLTSATMMNRHSSCLQGTSFGTSEYDHHDSKFAIPNMKVPFSTDDHHHKLQYGEAGHHDHQLPVLVSAATSAYVTITHDTTAANDQFATPYIPHQFSNSTHSSTTTTTTSTTSSTATFEIDHEVACAGRDLIVMDDYHQEATNNDQSYWKHIME
97		Rmu_sc0006984.1_g000003.1 /fd	ATGGGTCGGATTCCATGCTGTGAGAAGGACAATGTGAAAAGGGGACAGTGGACTCCTGAAGAAGATAACAAGCTCTCTTCCTACATTGGCCAGCACGGTACTCGCAATTGGCGTCTCATCCCAAAGAATGCCGGTTTACAAAGATGTGGGAAGAGTTGTCGGCTACGTTGGACCAACTACCTTCGACCTGACCTCAAGCACGGGCAGTTCTCAGAGGCGGAAGAGCAAACCATTGTCAAGCTCCACTCTGTTGTTGGCAACCGATGGTCCTTAATTGCTGCACAACTTCCTGGTCGCACTGACAATGATGTGAAAAACCACTGGAATACAAAGCTCAAGAAGAAGCTGTCGGGTATGGGGATAGATCCAGTCACCCACAAACCCTTTTCCCACCTCATG…	MGRIPCCEKDNVKRGQWTPEEDNKLSSYIGQHGTRNWRLIPKNAGLQRCGKSCRLRWTNYLRPDLKHGQFSEAEEQTIVKLHSVVGNRWSLIAAQLPGRTDNDVKNHWNTKLKKKLSGMGIDPVTHKPFSHLMAEIATTLAPPNVANLAEAALGCFKDEMLHLLTKKPIDFQFQHSNTTPGNRTATYINNKEEEDDTIEKIKIGLSRAMQEPDMLHSQKSWDPTGATSANLTGNCSAFPLHSISGFQYGLSTFGNEGGGSPWSQSMCTGSTCTGADQQGHLHDKLDEEIGEESEGGKELRNGSNIFNSDSILWDLPSDDLMNPIV
98		Rmu_sc0006592.1_g000003.1 /fd	ATGGGAAGGCAGCCTTGCTGTGACAAACTTGGGGTTAAGAAAGGGCCATGGACAGCCGAGGAGGATAAGAAGCTCATCAACTTCATTCTCACAAATGGCCAGTGTTGCTGGAGAGCCGTCCCCAAGCTCGCTGGGCTTCGCCGCTGTGGCAAGAGTTGCAGACTCCGTTGGACCAACTATCTCCGTCCCGACTTGAAGAGAGGCCTCCTTACAGAATCTGAAGAACAGTTGGTCATTGATCTCCATGCTCGTCTCGGAAATAGGTGGTCCAAGATTGCAGCCAGATTGCCAGGGAGGACTGATAATGAAATCAAGAATCACTGGAACACCCACATCAAGAAAAAGCTGCTTAGAATGGGAATTGATCCCGTCACGCATGAACCCCTCCACAAAGATCAA…	MGRQPCCDKLGVKKGPWTAEEDKKLINFILTNGQCCWRAVPKLAGLRRCGKSCRLRWTNYLRPDLKRGLLTESEEQLVIDLHARLGNRWSKIAARLPGRTDNEIKNHWNTHIKKKLLRMGIDPVTHEPLHKDQDDLINKETIISSHTNQANNILPQSTTENSSSNSSPAENSSSSSSPNENSSGDDQSTLIDSICNVDESLMNSLWVDETPLIDALWNSDQVPDGGNYIENGMGVQSNWEENCSWLLDCQDFGVHDFGVDCFIETELNALDTLGMEKI
99		Rmu_sc0000467.1_g000012.1 /fd	ATGGAAGAAGATTTGATTCTGATAAACTATATTGCAAACCATGGTGAAGGTGTATGGAACTCCCTTGCCAAATCTGCCGGTTTGAAACGTACTGGGAAGAGTTGCAGACTCCGATGGCTAAACTATCTCCGACCGGACGTTAGGAGAGGCAATATCACACCAGAGGAACAGCTCTTGATCATGGAACTGCATGCCAAGTGGGGAAACAGGTGGTCGAAAATCGCAAAGCATCTGCCAGGACGGACCGACAATGAAATCAAGAACTACTGGAGAACCCGAATCCAAAAGCACATCAAGCAAGGTGATCAGAGCAATTCACAGGGACAAAGCTCAGAAGGGACTGCAGATCAGGCAAGCACGAGCCAAATGGGATCGAGCAGCACTACTGGTCTCGACCCA…	MEEDLILINYIANHGEGVWNSLAKSAGLKRTGKSCRLRWLNYLRPDVRRGNITPEEQLLIMELHAKWGNRWSKIAKHLPGRTDNEIKNYWRTRIQKHIKQGDQSNSQGQSSEGTADQASTSQMGSSSTTGLDPMETTYPLCPTTASYPVTLVQPPDHPNVVPPPDSNQESYWSMEDLWSMQLLNE
100		Rmu_sc0004947.1_g000027.1 /fd	ATGGGCAGGCAACCTTGTTGTGACAAGCTTGGCGTCAAGAAAGGTCCATGGACAGCCGAGGAAGACAAGAAACTAGTGAACTTCATCCTCACTCATGGCCAATGCTGCTGGCGCGCCGTCCCCAAGCTCGCGGGTCTGCGCCGCTGCGGCAAGAGCTGCCGCCTCCGCTGGACTAACTATCTCCGGCCGGACTTGAAGCGAGGGCTACTCAATGAAGCTGAGGAGCAGCTTGTTATTGACCTCCATGCTAGTCTTGGCAATAGGTGGTCTAAAATTGCAGCAAGACTGCCTGGAAGAACAGACAATGAGATCAAGAATCACTGGAATACACACATTAAGAAAAAACTTATCAAGATGGGGATTGATCCAATTACTCATGCGCCTCTCCAAAAACAAGTC…	MGRQPCCDKLGVKKGPWTAEEDKKLVNFILTHGQCCWRAVPKLAGLRRCGKSCRLRWTNYLRPDLKRGLLNEAEEQLVIDLHASLGNRWSKIAARLPGRTDNEIKNHWNTHIKKKLIKMGIDPITHAPLQKQVTTTPQETPCEANIQQSVNIPEHGVSSNENGSSATENSSSNEAQSLIEVNANGDDDPLVNYILSDTFLQDWSWNFPAVEDNYSDLGLSSTSSEDSSAWFMDCKDFGVEDFELGNCIN
101		Rmu_sc0002040.1_g000020.1 /fd	ATGGGACGCCATTCGTGTTGTTTGAAGCAAAAGTTAAGGAAAGGTCTCTGGTCACCGGAAGAAGACGAGAAGCTCTTCAATTACATCACTAGATTTGGCGTCGGTTGCTGGAGCTCTGTCCCCAAGCTTGCAGGGTTGCAAAGATGTGGTAAGAGTTGCAGGTTGAGATGGATAAACTACTTGAGGCCTGATTTAAAGAGAGGAATGTTCTCTCAGCAAGAAGAGGACCTCATTATTAGTCTCCATGAAGTTCTTGGGAACAGGTGGGCTCAAATTGCAGCACAATTGCCAGGAAGAACAGATAATGAGATAAAGAACTTCTGGAATTCGTGTTTGAAGAAGAAGCTAATGAAGCAAGGGATTGACCCGACCACTCACAAGCCACTAACAGATGAAGAA…	MGRHSCCLKQKLRKGLWSPEEDEKLFNYITRFGVGCWSSVPKLAGLQRCGKSCRLRWINYLRPDLKRGMFSQQEEDLIISLHEVLGNRWAQIAAQLPGRTDNEIKNFWNSCLKKKLMKQGIDPTTHKPLTDEELLKDDKTNIVKCSELNNESSSLPLVPAHEHHHELPMANSSQGPTFLVNDSSYFDGTSTGISTTQTSRAAAAFDSLSYFEFQTSIDPSGYNSDLVTSTQYHPPTTNSIRPSFNYEAIIGYNSMPSLANSDHGSMSGTDFSFSSSNSSTAGFHMNHNNNVVENNAGTFSWDINTENKLESLFHQFDGPKSEELVMMKPNSSSWEEGQLHHQHQNSVDFSSYPLTSLSEDLTGANFDVFQHI
102		Rmu_sc0002888.1_g000037.1 /fd	ATGGGAAGAAGCAGCTCTCGTTGTGATAAGGAGGGAGCGAACAAAGGAGCCTGGACTGCTCATGAAGATCAGGTTCTGAGAGATTATGTCAAAGAGTACGGTGAAGGGAAATGGGGGAAAATGTCGAGGGAAACAGGTCTGAAGAGATGTGGAAAGAGTTGCAGGCTTAGGTGGTTGAATTATCTGAGGCCTGATATCAAGAGAGGGAACATTACAGGAGATGAAGAAGAGCTCATCATCAGGCTTCACAAACTCTTAGGCAACAGATGGTCATTGATAGCTGGAAGGCTTCCAGGGCGAACAGACAATGAGATAAAGAACTATTGGAATTCTACCATAAGGAAGAAGCAGGAAAACAGCTCAAGACGGTCTAGAAACGAGAGGAAAACCATCAAGGAC…	MGRSSSRCDKEGANKGAWTAHEDQVLRDYVKEYGEGKWGKMSRETGLKRCGKSCRLRWLNYLRPDIKRGNITGDEEELIIRLHKLLGNRWSLIAGRLPGRTDNEIKNYWNSTIRKKQENSSRRSRNERKTIKDPYLTNNEIRPTSSTRNELAEQPFLSGVERNIKAEPDSGDGFLQTTGESGMAWNFIMDLNAGQLSISEFLHTDFSKLCELNTMVADGTNGADIGHLEL
103		Rmu_sc0004359.1_g000049.1 /pd	ATGCACACTTGTGTCAGTCAATACGGGAAGGCTGATCTAAGTTGTTCATTGATTTCCCTCAAGATCTCAGATATTTTGAAGATGGGGAGAAAACCATGCTGTGAAAAGGAAGGGGTCATCAGAGGAGCATGGTCTACAATGGAAGATCAAATCCTCACTGACTACGTTCTAACATATGGAGAAGGGAGATGGAGAGACCTTCCTCAAAAAGCTGGGTTGAACCGGTGCGGGAAGAGTTGCAGACTAAGATGGATAAATTATCTTAGGCCTGATATCAAGAGAGGCAACATTTCTGCTGAAGAAGAAGACCTAATTATGAGACTGCATAAGCTTCTGGGAAACCGGTGGTCTCTCATTGCCGGGAGACTGCCAGGGCGGACAGACAACGAGATCAAGAAC…	MHTCVSQYGKADLSCSLISLKISDILKMGRKPCCEKEGVIRGAWSTMEDQILTDYVLTYGEGRWRDLPQKAGLNRCGKSCRLRWINYLRPDIKRGNISAEEEDLIMRLHKLLGNRWSLIAGRLPGRTDNEIKNYWNTTLCKRSPSMEQNDEEEASKLKKCTARSKQRVSAETQKKQVEVIRTKAVKCTKVFIPSHLHSYTNAVTNSASSEYSTEVPGSSAAQEQNFCGLVMDFDINDLLISDMLESSKDFLQHQVNECHEDQMGDDGAKLEDLLMAEARSENWMASTHYYPFQPNIDDEHVDLNALSSFLNAADDDDQEWMIG
104		Rmu_sc0012378.1_g000001.1 /fd	ATGGGAAGGCAGCCTTGTTGTGACAAAGTTGGGTTGAAAAGAGGTCCATGGACAATTGAGGAGGATCACAAGCTCATGAATTTTATCCTCAACAATGGGATCCATTGCTGGAGAGTGGTTCCGAAGCTTGCAGGATTGCTTAGATGTGGGAAAAGCTGCAGACTCAGATGGATCAATTATCTAAGGCCAGACCTCAAGAGAGGTGCTTTTACAGAAACGGAAGAGGATCAGATCATTCAACTCCATTCATGTCTTGGTAACAGGTGGTCTAAGATTGCTTCACATTTTCCGGGTAGGACGGATAATGAAATCAAGAACCACTGGAATACAAGGATCAAGAAGAGGTTAAAGCTCCTCGGAGTAGACTCTGTGAGCAACAAAGCCATTGATCCAAAAGAA…	MGRQPCCDKVGLKRGPWTIEEDHKLMNFILNNGIHCWRVVPKLAGLLRCGKSCRLRWINYLRPDLKRGAFTETEEDQIIQLHSCLGNRWSKIASHFPGRTDNEIKNHWNTRIKKRLKLLGVDSVSNKAIDPKESMEDNKEIVTDISTELGQDNGLEPKLLQDDDNGNKGFEELSNEVELSAFDETADVLENYEMFCGSLDLGTFMLNQGVSNSSTISSNNTSATTTTTNSSISVEESNYNPSISIGDRSLLQQNCLQQWVESVDSMLSWDGFNNLEQDLFFF
105		Rmu_sc0004657.1_g000064.1 /pd	ATGGAGGACCAGTCGGGTTTGAGAAGAGGTGCGTGGACCATAGAAGAAGATAATCTTCTGAGGCAGTGTATTGCAAAGCATGGAGAAGGAAGATGGCGCCTGATTCCTCCAGCTGCAGGCTTAAACAGATGCGGGAAGAGCTGTAGGCTAAGATGGGTCAATTATCTGAAACCGGATATAAAGAGAGGAGATTTCGAGGACGATGAAGTAGATCTCCTCCATAGGCTTCACAACCTTTTAGGCAACAGGTGGTCATTGATTGCTGGAAGACTTCCGGGAAGAACAGCAAATGATGTGAAAAACTTTTGGAACACCAAGCGGCGTCGGGACAAACCACAAAGATTGGTGAAGCCCATCATACTAAGACCTAAACCACGAAGGTTAATCTCGACCAGTTCA…	MEDQSGLRRGAWTIEEDNLLRQCIAKHGEGRWRLIPPAAGLNRCGKSCRLRWVNYLKPDIKRGDFEDDEVDLLHRLHNLLGNRWSLIAGRLPGRTANDVKNFWNTKRRRDKPQRLVKPIILRPKPRRLISTSSLCLTGQGLIGDQSQLKKNISMALPTSSASPTSPIQQEIDRLRAFLEEEESIRTTTCFSLTPEGLFIEDHIQSENSISCRALPTSTALEDQLDWWMTFLDR
106		Rmu_sc0005990.1_g000003.1 /fd	ATGAGGAAGCCGGAACCCTCTGTTGTAAGTAGTACCGGGAAGAATAACAAGAACAACAGCATGAGTAACAAGCTGAGGAAGGGTTTGTGGTCGCCGGAAGAAGACGAGAAGCTGATGAGGTACATGCTCAACAATGGCCAAGGCTGCTGGAGCGACGTGGCAAGAAATGCTGGCCTCGAGAGGTGCGGCAAGAGTTGCAGGCTTCGTTGGATCAATTACTTGAGACCTGACCTTAAGAGAGGTGCCTTTTCTCCCCAAGAAGAAGACCTCATCATCCACTTCCATTCCCTTCTTGGTAACAGGTGGTCTCAAATCGCAGCACGCTTGCCAGGACGAACTGACAATGAAATCAAGAACTTCTGGAATTCGACCATAAAGAAACGTCTGAAGGTTCTGTCC…	MRKPEPSVVSSTGKNNKNNSMSNKLRKGLWSPEEDEKLMRYMLNNGQGCWSDVARNAGLERCGKSCRLRWINYLRPDLKRGAFSPQEEDLIIHFHSLLGNRWSQIAARLPGRTDNEIKNFWNSTIKKRLKVLSSSSSSTASPNASDSSSDQPNNKDFFTTAGGGGGFMNIIPQSMMPIYGDSSMQSTSLINHMFDPFPMVEHGGYYNNGNPCTAQIGSSVGSGADDCGFEENIEAFGNVNIGVEEDIFVPPLESVSTTDQDQNLKTETIFYDNNNYYSNSNNIIKGENMIGVGNYFEDDQDQGLTMGEWDLEDLMKDVSSFPFLDYQS
107		Rmu_sc0004359.1_g000048.1 /fd	ATGGGGAGAAGCCCTTGTTGTGCTAAGGAGGGCTTGAATAGAGGTGCATGGACTGCTCTCGAAGATAGAGATCTGACTGAATACATCAAAGTTCATGGCGAAGGAAGATGGAGAAACCTCCCCAAAAAAGCAGGACTGAAAAGGTGTGGGAAGAGCTGCAGGCTTAGGTGGTTGAACTATTTGAGACCAGACATTAAGAGAGGCAACATATCACCTGATGAAGAAGAGCTCATCGTCAAGCTTCACAAGCTCTTGGGCAACAGATGGTCTCTAATAGCGGGTAGGCTACCAGGGCGAACAGACAATGAAATAAAAAACTACTGGAACACCAATCTGAGCAAAAGAATTCAAGACCAAGAAGCTCGCTCATCGCCCTCATCAGCTGGTGGTGAAGAACCA…	MGRSPCCAKEGLNRGAWTALEDRDLTEYIKVHGEGRWRNLPKKAGLKRCGKSCRLRWLNYLRPDIKRGNISPDEEELIVKLHKLLGNRWSLIAGRLPGRTDNEIKNYWNTNLSKRIQDQEARSSPSSAGGEEPKSKKAKNVMASPFSHNVIRTKAAKCNKVFINPQLPHKGLFQMDDHRPMDHHQHVDHRPDENGLSLSPSLLETSSSSEFLVDFGMNSDLCLASLLSSKFSSGDYLFSEEMQLQEQYWSGNVGSGEDCVVDDQLQPNTVLNFQSLNYFLDADANQGDWLELAESS
108		Rmu_sc0013510.1_g000001.1 /fd	ATGATCATGAGCAACAGCAGAGATGGATCAATGGACTTGAACGAGATGGTTACGGCCGCCCAGTTAGGAGGTGGGGCCCACCAGCTTCATCAGCCCCTGCGGGGGCTGAAGAAGGGGCCGTGGACAGCGGCCGAGGATTCAATTCTGATGGAGTACGTGAAGAAACACGGCGAGGGGAACTGGAACGCCGTGCAGAAGAACTCGGGGCTGGCCAGGTGCGGCAAGAGCTGCAGGCTCCGGTGGGCTAACCATTTGAGGCCTAATCTCAAGAAAGGCTCTCTCACTGCAGAGGAGGAGCGAATGATCATCGAACTTCATGCCAAGTACGGCAACAAATGGGCTCGCATGGCTTCTCAGTTACCCGGTAGGACTGACAACGAGATAAAGAACTACTGGAAC…	MIMSNSRDGSMDLNEMVTAAQLGGGAHQLHQPLRGLKKGPWTAAEDSILMEYVKKHGEGNWNAVQKNSGLARCGKSCRLRWANHLRPNLKKGSLTAEEERMIIELHAKYGNKWARMASQLPGRTDNEIKNYWNTRMKRRHRAGLPIYPHELQHEAAASFHHQQAHHQQQRHNSNSSSSSFSSLLSSSHPRKANYSSTPSLSLYDHISFDASLQNHHNSPSLNYSNSAMTTQFNGNGGFAIPLSPVSPVSPFGSSSSALFNQTILPTPSQYYNSGHGGFGNYSTLSLSSMIMGTPTYEPMNSELPSNQTPPYSPYTPTKPASSANFNGGEGLMEASGNTNGYEIETVTSQGKRGSGLLDDVLVQADVICGNKRSRSGDSSSAESGKDKYIVEEEDESAGQ…
109		Rmu_sc0005038.1_g000005.1 /fd	ATGGGGAGGCAACCATGTTGTGATAAGGTTGGGTTGAAGAAGGGACCTTGGACAGCCGAAGAGGACAAGAAGCTCATTAACTTCATCCTCACCAATGGCCAATGCTGTTGGAGAGCTGTACCTAAGCTTGCAGGATTGTTAAGGTGTGGAAAAAGCTGCAGGCTGAGATGGACCAACTATCTCCGGCCAGACTTGAAGAGAGGTCTGTTATCTGAACATGAAGAGAAGATGGTCATTGATCTTCATGCCCAACTTGGAAACAGATGGTCTAAGATTGCTTCTCATCTCCCTGGAAGAACTGATAATGAGATCAAAAATCACTGGAATACCCACATCAAGAAGAAGCTGAAAAAAATGGGGATTGATCCTCTCACTCACAAACCACTTCCCAATGGCAAT…	MGRQPCCDKVGLKKGPWTAEEDKKLINFILTNGQCCWRAVPKLAGLLRCGKSCRLRWTNYLRPDLKRGLLSEHEEKMVIDLHAQLGNRWSKIASHLPGRTDNEIKNHWNTHIKKKLKKMGIDPLTHKPLPNGNEIENQSQQKQHIQNDQEQQQQEEEQSCTATDDTFEIDQINEGGKVEDKVEFVTMDHDDHELLNGFCIDEVPLIEPHEIHLVPNCAPSSSTSSSSSCSNSSSNFLEDLQYLPDFGWPNCDYSSSSNNNNDIIINNDTMGLWDDDFSSWGQESWAFGVL
110		Rmu_ssc0000386.1_g000051.1 /fd	ATGGGGAGGCAACCATGTTGTGATAAGGTTGGGTTGAAGAAGGGACCTTGGACAGCCGAAGAGGACAAGAAGCTCATTAACTTCATCCTCACCAATGGCCAATGCTGTTGGAGAGCTGTACCTAAGCTTGCAGGATTGTTAAGGTGTGGAAAAAGCTGCAGGCTGAGATGGACCAACTATCTCCGGCCAGACTTGAAGAGAGGTCTGTTATCTGAACATGAAGAGAAGATGGTCATTGATCTTCATGCCCAACTTGGAAACAGATGGTCTAAGATTGCTTCTCATCTCCCTGGAAGAACTGATAATGAGATCAAAAATCACTGGAATACCCACATCAAGAAGAAGCTGAAAAAAATGGGGATTGATCCTCTCACTCACAAACCACTTCCCAATGGCAAT…	MGRQPCCDKVGLKKGPWTAEEDKKLINFILTNGQCCWRAVPKLAGLLRCGKSCRLRWTNYLRPDLKRGLLSEHEEKMVIDLHAQLGNRWSKIASHLPGRTDNEIKNHWNTHIKKKLKKMGIDPLTHKPLPNGNEIENQSQQKQHIQNDQEQQQQEEEQSCTATDDTFEIDQINEGGKVEDKVEFVTMDHDDHELLNGFCIDEVPLIEPHEIHLVPNCAPSSSTSSSSSCSNSSSNFLEDLQYLPDFGWPNCDYSSSSNNNNDIIINNDTMGLWDDDFSSWGQESWAFGVL
111		Rmu_sc0002383.1_g000019.1 /fd	ATGGGGAGAGCTCCTTGCTGTGACAAGGATAATGTGAAGAAAGGACCATGGTCACCTGAAGAAGATGCAAAGCTTAAAGAGTATATAGAAAAATATGGGACCGGAGGGAATTGGATTGCTCTTCCACAGAAAGCTGGTCTAAGGAGATGTGGAAAAAGTTGCAGATTAAGATGGCTTAACTATCTCAGGCCCAACATTAAACATGGAGAATTTTCTGATGAAGAAGATAAGATCATCTGCAACCTCTTTGCTAGCATTGGAAGCAGGTGGTCAATTATAGCAGCTCAATTGCCAGGAAGGACCGACAATGATATCAAGAACTACTGGAACACAAAGCTCAAGAAGAAACTCAACCAATATTCCATGATGGGCATAATTCCTCACCACTCCGCCACCTTC…	MGRAPCCDKDNVKKGPWSPEEDAKLKEYIEKYGTGGNWIALPQKAGLRRCGKSCRLRWLNYLRPNIKHGEFSDEEDKIICNLFASIGSRWSIIAAQLPGRTDNDIKNYWNTKLKKKLNQYSMMGIIPHHSATFSSLLHHQTSTSSSSPPSYRSSNNTSAPTYYTHQPRSFTSTANLESHIPFSPSLLSSTNTTTNAALQVGQESYVSQPLTQHYQAKDNILMFGGTTTEASCSSSDGSYGTGYGEVQLGLQNYFYNNGAEANNQKIMVSDNGLGLDHDQAPLDYGLEEIKQLISSSTTTSGGCNNFLFDENKTEEKVMMYY
112		Rmu_sc0003147.1_g000008.1 /fd	ATGGAGGTGAGAAAAGGTTCATGGACCAAAGAGGAAGATCATCTTCTCAGGAACTACATTGAGAAACATGGACAAGGAAGATGGCACAAGGTTCCTCTCCAAGCAGGCTTAAACCGATGCAGAAAGAGCTGTAGAATGAGGTGGTTGAATTATTTGAAGCCAAACATTAAGAAAGGAGACTTTGCAGAGGATGAAGTCGATCTAATGATTAGGCTTCGGAAGCTATTGGGAAACAGGTGGTCTTTGATTGCTGGACGACTTCCTGGAAGAACATCAAACGATGTGAAAAACTATTGGAGTGCTCGAGGAAGAAGAAACATAAATTTTAGCTTCACAAAAAATTATAAGCATCCAGAAATAACAAAGACCACAATAATAAGACCTCGACCACGAACCTTC…	MEVRKGSWTKEEDHLLRNYIEKHGQGRWHKVPLQAGLNRCRKSCRMRWLNYLKPNIKKGDFAEDEVDLMIRLRKLLGNRWSLIAGRLPGRTSNDVKNYWSARGRRNINFSFTKNYKHPEITKTTIIRPRPRTFTKSLHYLSAKATTSKPINLENSSLSTSPPMQNGNEEWKTLLEEDVLTNFWNEDTVSMSSMGVNSTQQGFEMDLWHFLQEEARQ
113		Rmu_sc0003147.1_g000006.1 /fd	ATGGAGGTGAGAAAGGGTTCATGGACCAAAGAGGAAGATCAACTTCTCAGGAACTACATTGATAAACATGGAGAAGGAAGATGGCACAAGGTTCCTTTCCAAGCAGGCTTAAACCGATGCAGAAAGAGTTGTAGAATGAGGTGGTTGAATTATTTGAAGCCAAACATCAAGAGAGGAGACTTTGCAGAGGATGAAGTGGATTTAATGATTAGGCTTCGGAAGCTTTTGGGAAACAGGTGGTCTTTGATTGCTAGACGACTTCCTGGAAGAACATCAAATGATGTGAAAAACTATTGGAGTGCTCGGCGAAGGAGAGACATAGATTTTGGCATCATGAAAAATAAAAAGCCTCCAAAAATAACAAAGAATACAGTAATAAGACCTCGACCACGAATCTTC…	MEVRKGSWTKEEDQLLRNYIDKHGEGRWHKVPFQAGLNRCRKSCRMRWLNYLKPNIKRGDFAEDEVDLMIRLRKLLGNRWSLIARRLPGRTSNDVKNYWSARRRRDIDFGIMKNKKPPKITKNTVIRPRPRIFTKSLHYLSARPATSKPIELAGNSSSSISPPIQNEVDEWKTLLEGDVLTNFWVEDLASISSIGVNSTEQGFEMDLWQFLQEEARQ
114		Rmu_sc0002888.1_g000015.1 /fd	ATGGGGAGGAGTCCATGCTGCTCCAAGGAAGGACTTAACAGAGGAGCTTGGACTGCCTTGGAAGATAAAGTACTAACGTCTTACATCAAAGCCCATGGAGAAGGCAAATGGAGAAACCTCCCAAAGAGAGCTGGTTTGAAGAGATGTGGTAAGAGCTGTAGACTGAGATGGTTAAACTATCTGAGGCCAGACATAAAGAGAGGTAATATATCCGGGGATGAAGAAGAACTCATTATCAGACTCCATAATCTTCTTGGCAACAGATGGTCTCTAATAGCTGGAAGGCTACCGGGGCGAACAGACAATGAAATCAAAAATTACTGGAACACCACTCTGGTGAAGAAAGCTAAACCCGAATCGCATTCGGGATCATCCAAGGAAACATCTCCCGCTCCGACC…	MGRSPCCSKEGLNRGAWTALEDKVLTSYIKAHGEGKWRNLPKRAGLKRCGKSCRLRWLNYLRPDIKRGNISGDEEELIIRLHNLLGNRWSLIAGRLPGRTDNEIKNYWNTTLVKKAKPESHSGSSKETSPAPTKFRPRTPSATATQPQVIRTKATRLTRMLVPSLPLLIDDYSTTTSPLDLRVPQTQSVSSLPEDAANTEVHIQGTDAMNFGCNGFQATAGEEEDAMGSYDIPLDDGMLNDWTGNDNCDLEKYGASLDLDSLAFLLDSDDWLGQENGI
115		Rmu_ssc0000154.1_g000025.1 /fd	ATGAGAAAGCCAGAGTTGTCCGTGGGAAAAGACGTAAAAGCGAACAGTAACAGCAAGAATAAGATGATGAATAATAAGCTCAGGAAGGGATTGTGGTCGCCGGAGGAAGACGAGAAGTTGATGAGGTACATGTTGAGCAATGGACAAGGGTGTTGGAGTGACATTGCTAGAAACTCTGGTCTCCAAAGGTGTGGAAAGAGTTGTCGTCTTCGTTGGATTAACTACTTGAGACCTGATCTCAAGCGTGGTGCATTTTCGCTTCAGGAAGAACACCTTATCATCCATTTTCATTCCATTCTTGGCAACAAGTGGTCACAGATTGCTGCACGTCTTCCAGGACGAACAGACAATGAAATCAAGAATTTTTGGAACTCTGCATTGAAAAAAAGGTTGAAAAAT…	MRKPELSVGKDVKANSNSKNKMMNNKLRKGLWSPEEDEKLMRYMLSNGQGCWSDIARNSGLQRCGKSCRLRWINYLRPDLKRGAFSLQEEHLIIHFHSILGNKWSQIAARLPGRTDNEIKNFWNSALKKRLKNNNISTSTSSPNESDHSSEPNVNIGGATPFIPMHNEHDMLMSMMYMDSSSSSSSASMQVINNSTFAPNFSVLDSSSLLNYVNHTGLTQLPEAQYGDYGNYLEAGHKMGIEGDLCLPHLETSRRSLIENNNGQVVDNISNNNINHFHNDNNNNCFTNTANNMSFKVDDGDIFGQAEAGGSLRVGEEWDFEGFMQDISCFLS
116		Rmu_ssc0000196.1_g000009.1 /fd	ATGGTGAGAGCTCCGTTCTATGACAAAAGTGGAGTAAAGAAAGGGGCATGGAGTGCTGAAGAAGACGATAAGTTGAGAACTTATATCCAAAGCTATGGCCATTGGAACTGGCGTCAACTACCGAAATTTGCTGGTATACAAAGGTGCGGGAAAAGTTGCAGACTAAGATGGAAGAACTACCTTCAACCAGGTGTAAAACATGGAGATTACACTGAAGAAGAAGAGGCTTTAATCATCAAACTACATGAACAACTTGGGAATAAATGGTCGATGATTGCTGCAAAATTACCAGGAAGAACTGACAATGAAATAAAAAACCATTGGCACACCCACATGAAGAAGAAGAAGAAGCGCACAAAAGAACAGCAAAATCAAACATCATCTGGTCAAGTGGTACTT…	MVRAPFYDKSGVKKGAWSAEEDDKLRTYIQSYGHWNWRQLPKFAGIQRCGKSCRLRWKNYLQPGVKHGDYTEEEEALIIKLHEQLGNKWSMIAAKLPGRTDNEIKNHWHTHMKKKKKRTKEQQNQTSSGQVVLLKDHQQSSDDHEYSSSNSDNQLGAHESATHNCNHANSLQLLHYPQILESSPVVSRESTFSSSTSSAKYFSSSSSSSSSSSPNNHEARGSTVIMNYLGDQDIVMVSSSETMILDQEYSAGDFWTKPFLQDNTCIESDTISSSSSYLLSYDEGMDLFYQVMPTPQEGS
117		Rmu_sc0006777.1_g000005.1 /fd	ATGGGAAGAACTCCGTGTTGTGACAAGAAGGGGCTGAAGAGAGGTCCATGGACACCTGATGAGGATGAGATTCTTGTCAATTACATCAACAAGAATAAGGGACATGGCAGCTGGAGAACTCTCCCACATCATGCAGGTTTAAATTTCTTTGTGTGTACTGCTACTCGTTCTATCTGGGTGTTGGTCAATGTTTGCCCTTTTCATGGTCTTCTTCGTTGTGGAAAGAGTTGCCGGCTCAGGTGGACAAATTATCTGAGACCGGACATTAAGCGCGGCCCTTTCACTGACGAAGAAGAGAAGCTTATCATTCAGCTCCATGGCATGCTTGGAAACAGGTGGGCTGCTATAGCTTCTCAGTTACCTGGACGAACTGACAATGAGATCAAGAACTTATGGAAC…	MGRTPCCDKKGLKRGPWTPDEDEILVNYINKNKGHGSWRTLPHHAGLNFFVCTATRSIWVLVNVCPFHGLLRCGKSCRLRWTNYLRPDIKRGPFTDEEEKLIIQLHGMLGNRWAAIASQLPGRTDNEIKNLWNTHLRKRLIRMGVNPQNHEPFTSDGSTSKASASIATRHMAQWESARLEAEARLSRESSNFSTPLLDKSDSDYFLRLWYSEVGQSFRKFPTAGKTPSDSPISEASSSGKCGSISAVTTEIGHCLMGSSTIAGNQDEDIEYKVFKSITGEDMVYRIYKSNTENVTRGSDSSSSNKLDDSSESAMDLLLDYPINNDMSFLEDDMNDYATSTSAKLENAFICPL
118		Rmu_sc0003383.1_g000026.1 /fd	ATGGCTGGTGTTGCAAACATTGTGTGCACAAGTCCTAATGAAGAAGAGAATGAGCTGAGAAAAGGGCCATGGACACTTGCCGAAGACACCCTGCTCACAAATTACATTGCCAACCACGGCGAAGGCCATTGGAATGCCTTAGCGAAATGTGCAGGATTGAAGAGGAAAGGAAAAAGCTGCAGATTGAGGTGGCTTAATTATCTGAAACCCGACACCAAGCGTGGGAACCTTACTTCACAAGAACAACTCTTGATCCTTGAACTCCATTCCAAGTGGGGTAACAGGTGGACAAAAATAGCGCAACATTTGCCAGGAAGAACAGACGATGAGATTAAGACCCACTGGAGAACAAGGGTGCACAAACAGGTGCGCCAACTTAATATTGAGTCTAATAGCGAG…	MAGVANIVCTSPNEEENELRKGPWTLAEDTLLTNYIANHGEGHWNALAKCAGLKRKGKSCRLRWLNYLKPDTKRGNLTSQEQLLILELHSKWGNRWTKIAQHLPGRTDDEIKTHWRTRVHKQVRQLNIESNSERLLDAVRCFWMPTLHQKMEQPSSLSLDPSSSLSNSQIAVAPSLSPQTYSVSSSPPSKVVSHVSDYSPIGNSSPSHSSLSSDSLISQLPQIQEQPASSSHAFEALNDNYYVDYDMEGFRFDPVSEMASFDTSQFDCQTAESNWIEDNYMTDTLWSMQGM
119		Rmu_sc0003317.1_g000023.1 /pd	ATGGGAAGCAGGAGTCATTGTCCACGTGATAAGCATGGAAGGAAGAAGGTTGCCTGGACTGCTTTTGAAGACCAGATTGTGAAAGACTACGTCAAAAACCACGGTGCAGGCAAATGGGACAAGCTATCTAAGGAAACTGGCAAGTGTCTGAAGAGATCCGGAAACAGTGTTAGACTTAGATGGTTGAATTATCTGAGGCCTGATATCAACACAAGTAGTATTACAGAATACGAAGAAGATCTTCTCATCAGGCTCCATAAACTCTTGGGCAACAGATGGTCATTGATAGCCAGAAGGATACCAGGCAGAACTGAAAATCAAGTTAAAAACTACTGGAATTCTACCTTGAAGAAGAAGCTGTCACAAAAAAATTTATGCGAAGAGCTTTGTAATTGGACT…	MGSRSHCPRDKHGRKKVAWTAFEDQIVKDYVKNHGAGKWDKLSKETGKCLKRSGNSVRLRWLNYLRPDINTSSITEYEEDLLIRLHKLLGNRWSLIARRIPGRTENQVKNYWNSTLKKKLSQKNLCEELCNWTLEDSSSPVPTTDQDDPHWTKKNVYEEGQACQG
120		Rmu_sc0002348.1_g000005.1 /fd	ATGGGAAGAGCTCCATGTTGTGACAAAGCTAGTGTCAAAAGAGGGCAATGGTCTCCTGAGGAAGATGAAGCTCTCAAGACTTACCTTGAGACTCATGGAACTGGTGGCAATTGGATTCATCTGCCTCAAAAAGCTGGGCTTAGGAGATGTGGGAAGAGCTGCCGTCTGCGGTGGTTGAACTATCTGAGGCCAGACATCAAACATGGAGGCTTCACTGAAGAGGAGGACAACATTATCTGTAACCTCTACACTCAAATGGGAAGCCGATGGTCATACATAGCTGCTCAAATGCCTGGAAGAACAGACAATGATGTGAAGAACTATTGGAACACCAAATTGAAGAAGAGGTTGTTTAGCAAAAACCCAAATGCCTCCTCACTCACACTGCCTTGTGTTCCA…	MGRAPCCDKASVKRGQWSPEEDEALKTYLETHGTGGNWIHLPQKAGLRRCGKSCRLRWLNYLRPDIKHGGFTEEEDNIICNLYTQMGSRWSYIAAQMPGRTDNDVKNYWNTKLKKRLFSKNPNASSLTLPCVPKLETNDEFQTQIPPTLMLSDYNSGLNAYDQSLSLKPNPLHNSKLTGLSQFGASSVSMSQDGSSVSDSSSIAAVDHGLLHGNSFINEDAAGIPMDFGFGGLSCDVVNQMWFGEKANEVVHPTCSTGLDGDFFFC
121		Rmu_sc0004637.1_g000011.1 /pd	ATGGAGGACCCGTCGGGTTTGAGAAGAGGTGCATGGACCATAGAAGAAGATAATCTTCTGAGGCAGTGTATTGCAAAGCATGGAGAAGGAAGATGGCGCCTGATTCCTCCAGCTGCAGATCGATGCGGGAAGAGCTGTAGGCTAAGATGGGTCAATTATCTGAAACCGGATATAAAGAGAGGAAATTTCGAGGACGATGAAGTAGATCTCCTCCATAGGCTTCACAACCTTTTAGGCAACAGGTGGTCATTGATTGCTGGAAGACTTCCGGGAAGAACAGCAAATGATGTGAAAAACTTTTGGAACACCAAGCGGCGTCGGGACAAACCACAAAGATTGGTGAAGCCCATCATACTAAGACCTAAACCACGAAGGTTAATCTCGACCAGTTCACTCTGT…	MEDPSGLRRGAWTIEEDNLLRQCIAKHGEGRWRLIPPAADRCGKSCRLRWVNYLKPDIKRGNFEDDEVDLLHRLHNLLGNRWSLIAGRLPGRTANDVKNFWNTKRRRDKPQRLVKPIILRPKPRRLISTSSLCLTGQGLIGDQSQLKKNISMALPTSSASPTSPIQQEIDRLRAFLEEEESIRTTTCFSLTPEGLFIEDHIQSENSISCRALPTSTALEDQLDWWMTFLDR
122		Rmu_sc0000186.1_g000014.1 /fd	ATGGGGAGAGCTCCTTGCTGTGACAAAACCAAGGTCAAGAAAGGCCCATGGTCACCTGAAGAAGATGCCAAACTCAAGTCTTACATTGACAAGCATGGCACCGGTGGCAACTGGATTGCCTTGCCGCAGAAGATAGGTCTTAAAAGATGTGGGAAGAGCTGTCGGCTGAGATGGTTGAATTATCTCCGGCCCAATATCAAACACGGTGGGTTCTCTGAGGAAGAAGATAACATCATCTGCAGCCTCTATATCAATATTGGAAGCAGGTGGTCTATCATTGCAGCCCAATTACCCGGGCGAACTGATAATGATATTAAGAATTACTGGAACACAAGACTGAAGAAGAAGCTTTTGGGCAAGCAGCGGAAAGAACAACAGGCACAGAATCGTAAAGCCGCC…	MGRAPCCDKTKVKKGPWSPEEDAKLKSYIDKHGTGGNWIALPQKIGLKRCGKSCRLRWLNYLRPNIKHGGFSEEEDNIICSLYINIGSRWSIIAAQLPGRTDNDIKNYWNTRLKKKLLGKQRKEQQAQNRKAAASLKQEIKRSSTTTNFHLPPDDFVNQVNPYWAPELPVVLPVMSYQTHDAQVLDDHQASIKNMLIKLGGRFSDTTNSMYSPIDHISSTSSHQFYQNSGIDHMLACSPAANSNYAQLGPSPSPTMFHGVDHQSDLEAELSELIFGNSQPHQQYDGLGGFYQMDTMNNGSTGGTTSTSAESEISWGDISSLVYSTTTPMVSEYENSCQQGVRPSDSAFAESTYFGMK
123		Rmu_sc0002115.1_g000020.1 /fd	ATGGCTTATGAAGCAGCAGCTGTGGAAGGTGAAAAACTGCGCAAAGGTCCATGGCTAGAAGAGGAAGATGAACGACTCACCATGTGTGTAAGACTTAAGGGGGATCGGAGGTGGGATGCATTAGCCAAGGAATCAGGTCTAAGGAGAAGTGGTAGGAGTTGCAGGTTGCGGTGGTTAAACTATCTCCGCCCCAATCTTAAGCATGGTCACATATCTGTCGAAGAAGAGAAAATTATCCTTCATCTTCATGAACTTTGGGGTAACAAGTGGTCAAAGATTGCAAGAGTGTTGCCAGGAAGAACTGATAATGAGATCAAGAACTACTGGAGGACACATTTAGTGAAGAAAGCACAAATTCAAGATGGAGATGCTGCATCTGCTGGAAACTTGCAATGTACA…	MAYEAAAVEGEKLRKGPWLEEEDERLTMCVRLKGDRRWDALAKESGLRRSGRSCRLRWLNYLRPNLKHGHISVEEEKIILHLHELWGNKWSKIARVLPGRTDNEIKNYWRTHLVKKAQIQDGDAASAGNLQCTSKRAQQGLFFQDGDDMSAEKKYNFDQDQDSVEKLWGAKETYSDDLCLSDFALPSSPYETWLSDWISELSSEQSGITWIPHHDSDAWDCSSSLWDMN
124		Rmu_sc0002348.1_g000027.1 /fd	ATGGGGAGAGCTCCTTGTTGTGACAAAGCGAACGTGAAGAGAGGGCCGTGGTCACCTGAAGAAGATTCCAAGCTCAAGTCGTATATTGAACTACACGGCACTGGTGGTAACTGGATTGCTTTGCCTCAAAAGATAGGGCTTAAGAGATGTGGGAAGAGCTGCCGGCTGAGATGGTTAAACTATCTGCGCCCGAACATCAAGCATGGAGGGTTTTCTGAAGAAGAGGACAACTTAATTTGCAGCCTCTATATAAGTATTGGAAGCAGGTGGTCTATAATTGCAGCACAACTGCCTGGAAGAACTGATAATGATATAAAGAACTACTGGAACACAAGGCTGAAGAAAAAGCTTCTGGGAAAGCACCGCAAGGAACACCAGGCTGCTGCGCGTAGATCCGCT…	MGRAPCCDKANVKRGPWSPEEDSKLKSYIELHGTGGNWIALPQKIGLKRCGKSCRLRWLNYLRPNIKHGGFSEEEDNLICSLYISIGSRWSIIAAQLPGRTDNDIKNYWNTRLKKKLLGKHRKEHQAAARRSAAGLKQQEIIKRGLIISSSSGNNNSMVNPVAAASQNPYWPELPVLQVPSIPNYSSPNQEVVVPSFNDHASIRKLLIKLGGRFHSDHHDNVAQPNIQDVYSSNGDIQLPVDQFPSSTQQIYHEESAANMHSSASLIAALASNNISNPGQFAQMNHYNNPADNAGYGGAVNMFQGGQSSNYFLSNELKDMVCNIDPEKLDGLEFLYSEDVMIMMNDRPISSTTNTSTSYGDQSTIGWSGDQMQLVYPPPLAASGLDYHEAMQRMIMPQD…
125		Rmu_sc0000508.1_g000008.1 /fd	ATGGGAAGGGCTCCTTGTTGTGACAAGGCAAATGTTAAGAAGGGACCATGGTCACCAGAAGAAGACTCAAAGCTCAAAGAATACATTGACAAATATGGTACTGGGGGAAATTGGATCGCTCTCCCTCAGAAAGCTGGTTTGAAGAGATGTGGAAAAAGCTGCAGATTGAGATGGCTTAACTATCTGAGGCCAAACATCAAACATGGAGAATTTTCTGAGGAGGAAGACAGAATAATTTGCACCCTCTTTACTAGCATTGGAAGCAGGTGGTCGATTATAGCAGCTCAGCTGCCAGGAAGGACCGACAATGATATCAAGAACTACTGGAACACCAAGCTGAAGAAGAAACTCAGGGATATGCAGACTCATATGGCTCCTCCTTCATTAACAACTTCTCAG…	MGRAPCCDKANVKKGPWSPEEDSKLKEYIDKYGTGGNWIALPQKAGLKRCGKSCRLRWLNYLRPNIKHGEFSEEEDRIICTLFTSIGSRWSIIAAQLPGRTDNDIKNYWNTKLKKKLRDMQTHMAPPSLTTSQSHRSNPPPFPVSSSLHQFQNQPFHHQPLSLMHKDLNMMTYSTYTPTLTSPATPGSFSSGFEIMPNISTPLTNYSSLFQTQECLVGSMHYNHPAVKKNINLIMFGSEGSCSTSSDGSCNNNQISYESRRSGNIKQEEMGMGFQLEDQNQKFMMLNYGNSSSAAISDDHHNYINNNNQWGERPNGYNGNNTRFGDYDLEDVKQLISSSSTDINININNDNGSISNSLFSVDENKTDHKEKVMYFY
126		Rmu_sc0002702.1_g000022.1 /pd	ATGGGAAGAAACTCAGGTTTCGAAAAGGAGGGATTGAAGAAAGGTATGTGGTCTGCTCGCGAAGACCAGGTTCTCAAGAACTATGTGAAAAAGCACGGTCCAGGCAAATGGGGAAAAACAGCAAGGGAGACTGGTCTGAAGAGATGTGGGAAGAGTGTGAGACTGAGATGGTTGAATTATCTGAGGCCCGGTATCAAGAAAGGCAACATTACAGAAGATGAAGAAGACCTTATTATCAGGATGCACAAACTCGTAGGCAACAGGTGGTCATTGATAGCAGGAAGGATTCCTGGCCGAACAGACAATGAAATAAAAAACTACTGGAACTCCACTCTAAGGAAGAAGCTCGCAGAACAGAAAGAAAAGGAATCAGAAGTGTCGAGAAACGAGATGATCAAG…	MGRNSGFEKEGLKKGMWSAREDQVLKNYVKKHGPGKWGKTARETGLKRCGKSVRLRWLNYLRPGIKKGNITEDEEDLIIRMHKLVGNRWSLIAGRIPGRTDNEIKNYWNSTLRKKLAEQKEKESEVSRNEMIKENLPCPVEDDGNQHLTKCDVVVGGGGGLMCIACNVNEEEDHQRRCLGCTSTDTTILSPRVGDGTGGGANNNIEPAGDDLNYNAMTWNDSIMDLNGGQLYMSEFLQTEFSKFWEETDRFMNFEVGGCSTINHELPNNWDG
127		Rmu_sc0000381.1_g000013.1 /fd	ATGGGTCGAGCTCCCTGCTGCGATAAGGCGAACGTGAAGAAGGGACCATGGTCACCTGAAGAGGATGCTACACTGAAGGCCTATATTGAAGAGCATGGAACTGGAGGCAACTGGATTGCCCTTCCTCAGAAAATTGGGCTCAAAAGATGTGGAAAAAGCTGCAGACTGAGATGGCTAAACTACCTGAGGCCCAACATCAAGCATGGTGGATTCTCAGAAGAAGAAGACAACATCATCTGCAACCTCTATATAAGTATTGGCAGCAGGTGGTCTATAATTGCAGCCCAATTGCCCGGAAGAACTGATAATGATATCAAGAACTACTGGAACACCCGGCTGAAGAAGAAGTTGCTTGGAAGGCGCAAGCAGTCTGGGGCTAATCGGGGAAGTCAGGACCTC…	MGRAPCCDKANVKKGPWSPEEDATLKAYIEEHGTGGNWIALPQKIGLKRCGKSCRLRWLNYLRPNIKHGGFSEEEDNIICNLYISIGSRWSIIAAQLPGRTDNDIKNYWNTRLKKKLLGRRKQSGANRGSQDLKDASDDAHQALSSSALERLQLHMQLQNLQNPFSFYNNPALWPKLHPFQEKMIQTVQSMNDQNSVNPLMMQQFSVPSHDQTVQGHKVNDHFYEQTTGALAIQEQYAKLCINPKMDELENALNGMSSSFISTSNPVDSTIVVAKADMIEQQVNSSFQAQLDGINNSVGFTSQQQDDQMVEFDCFKEMNVSKDSLMWWANDFDNKSASSNSWDSTSVLQSQGMFQDYELGYNL
128		Rmu_sc0007525.1_g000001.1 /fd	ATGGGGAAAAGCAGTACGTGCTATGATAAGAACGAGGGACCGAAGAAAGGAGGAGCCTGGGCTGCAAGTGAAGACCAGATTGTCAAAGACTACGTCAAAAAACATGGTGTGGGAAAATGGGGCAAATTATCTAGGGAAACAGGTCTGAAGAGATGTGGGAAGAGTGTGAGGCTTAGGTTGCTGAATTATCTGAGGCCTGGTATCGTTAGAGGCAACATTACAGAAGATGAAGAAGAGCTCATCATCAGACTCCACAAACTCTTGGGCAACAGATGGTCCCTGGTAGCCGGCAGGATACCAGGGCGAACTGATAATGAAATAAAGAACTACTGGAATTCCTGCTTAAAGAGGAAGCTACAACAACAAAACCACTTGGAAGTGCCTAGAAATGAGGAGATC…	MGKSSTCYDKNEGPKKGGAWAASEDQIVKDYVKKHGVGKWGKLSRETGLKRCGKSVRLRLLNYLRPGIVRGNITEDEEELIIRLHKLLGNRWSLVAGRIPGRTDNEIKNYWNSCLKRKLQQQNHLEVPRNEEIREDLSSSAAVAAAAEKNPHLTGNNVNEDEDYHQHHDVDFAVGIEFEAIDNNNGTGDDEHLRDDLWWNNFIMDLNDIQLDASEFQPDFPEIRLGNLW
129		Rmu_sc0030932.1_g000007.1 /pd	ATGGGAAGAAACTCAGGTTTCGAAAAGGAGGGATTGAAGAAAGGTATGTGGTCTGCTCGCGAAGACCAGGTTCTCAAGAACTATGTGAAAAAGCACGGTCCAGGCAACTGGGGAAAAACAGCAAGGGAGACTGGTCTGAAGAGATGTGGGAAGAGTGTGAGACTGAGATGGTTAAATTATCTGAGGCCCGGTATCAAGAAAGGCAACATTACAGAAGATGAAGAAGACCTTATTATCAGGATGCACAAACTCGTAGGCAACAGGTGGTCATTGATAGCAGGAAGGATTCCGGACCGAACAGACAACGAAATAAAAAACTACTGGAACTCCACTCTAAGGAAGAAGCTGGCAGAGGAAAAAGAAACGGAATCAGAAGTGTCGAGAAACGAGATGATCAAG…	MGRNSGFEKEGLKKGMWSAREDQVLKNYVKKHGPGNWGKTARETGLKRCGKSVRLRWLNYLRPGIKKGNITEDEEDLIIRMHKLVGNRWSLIAGRIPDRTDNEIKNYWNSTLRKKLAEEKETESEVSRNEMIKENLPSPVEDYGHQHLTKCDVVLGGGGGLMCFASNVNAEEDHQRRCLGGTSTDTTILSPRVGVGVGTGGGANNNIEPTGDDLNYNAMTWNDSIMDVNGGQLYMSEFLQTDFSKFWEETDRFMNFEVGGCSTFNHELPNNWDG
130		Rmu_sc0016065.1_g000002.1 /pd	ATGGGACATCACTCATGCTGCAACAAACAGAAAGTGAAGAGAGGGCTATGGTCCCCAGAAGAAGATGAAAAGCTCATAAACTACATTACGAATTACGGCCATGGCTGCTGGAGCTCAGTTCCTAAACTTGCAGGTCTCCAAAGATGTGGAAAGAGCTGCAGACTGAGATGGATAAATTATCTGAGACCAGACTTGAAACGTGGGAGCTTCTCTTCCCAGGAAGCTGCACTCATCATTCAACTCCATAGCATTTTAGGCAACAGTGGGGACATCGATGTTTCTGTAGCGTTCTGGCGGCGACGGCGGCGCTGGTCTTGCCAGACTGGGCCACGGGCATCCCAAACCGCTTCACCATGGAGATCGAGGTCGAAGGTTCTGGGCAGCGACCTCACCCAAACT…	MGHHSCCNKQKVKRGLWSPEEDEKLINYITNYGHGCWSSVPKLAGLQRCGKSCRLRWINYLRPDLKRGSFSSQEAALIIQLHSILGNSGDIDVSVAFWRRRRRWSCQTGPRASQTASPWRSRSKVLGSDLTQTSSQRVHKQEEGQASMSGKPSAPERCRSIDVRTFGAVWAQIAKHLPGRTDNEVKNFWNSSIKKKLIPHDVIPALASFSHFLNPSNAGSDQESFFTTLIANPNFGLQQEQPYLPFPTPLPPSSFYHGDHSILKLDYTNYSSNRLHFPTPIQLPSNYSSLYDSSWSLGYQPHLFDSNHQQDQILNNIEVAPHFNIGNELMVPSVASLPGYDHENLSVVPTMPQSCEINIDGSACRAMPFDPPDNHLPQELDSLAKVSSCFGPFGDHGSY…
131		Rmu_sc0000103.1_g000015.1 /fd	ATGAGGAGAAGCAGCACTTACTATGATAAGAATGATGGACTGAAGAAAGGAGCCTGGGCTGCAAGTGAAGACCAGATTGTCAAAGACTACGTCAAAAAACACGGCATCGGAAAATGGGGCAAACTAACTAGGGAAACAGGTCTGAAGAGATGTGGGAAGAGTGTGAGACTTAGGTGGATGAACTATCTGAGGCCTGATATCATCAGAGGCTACATTAAAGAAGATGAAGAAGAGCTCATCATCAGGCTCCACAAACTCCTGGGAAACAGATGGTCATTGATAGCTGGAAGGATACCAGGGCGAACTGACAATGAAATCAAAAACTACTGGAATTCCACCTTAAAGAGGAAGCTGGAACAAGAAAATCACTTAGAAGTGTTTAAAGATGAGGAGATCAAG…	MRRSSTYYDKNDGLKKGAWAASEDQIVKDYVKKHGIGKWGKLTRETGLKRCGKSVRLRWMNYLRPDIIRGYIKEDEEELIIRLHKLLGNRWSLIAGRIPGRTDNEIKNYWNSTLKRKLEQENHLEVFKDEEIKEDLPSSVAAADEENPRLTKNNVVEDEDHHRQHYDVDVGVGVGVEATNNNGIGDDEYLRDDLWWNNFIVDFNDTQLDVSDFQTDFP
132		Rmu_sc0002506.1_g000040.1 /fd	ATGGAGGACAGAATTCTTAGAGAGTATATAACAACTCATGGTGAAGGCAAATGGAGAAACCTTCCCAAAAGAGCAGGGCTTAAGAGATGTGGAAAGAGTTGCAGATTACGATGGTTGAACTATCTAAGACCTGATATCAAGAGAGGAAACATCACTCGGGATGAAGAAGAGCTCATTATCCGGCTTCATAAGCTCTTGGGAAACAGATGGTCTTTGATAGCGGGAAGGCTTCCTGGCCGAACAGACAATGAAATCAAGAATTACTGGAACACAAATATTGGGAAGAAAGTTCAAGATCACTCATCCACTAATTCTGAAGCCAATATTACTCACCGCAAACCACCAAATCATCAAACCCAGCAAAAGAACACAAACGTCGTCCGTACCAAGGCATCAAGG…	MEDRILREYITTHGEGKWRNLPKRAGLKRCGKSCRLRWLNYLRPDIKRGNITRDEEELIIRLHKLLGNRWSLIAGRLPGRTDNEIKNYWNTNIGKKVQDHSSTNSEANITHRKPPNHQTQQKNTNVVRTKASRCTKVFIPHLSQMDEENNPTVQQVAAPFLNHDYYDQVNNNDDPPLGMMGTGTDHQPADDLPPFLNLEIDDENSNSCGFMVDFKMDESFLSEFLNVDFSQLYSSTSTANGGDGVKAAISTSCGDDNHHKLHGPDFQSSMAPILDSELDWLS
133		Rmu_co8482105.1_g000001.1 /fd	ATGGGAAGAGCTCCATGCTGTGACAAATCTAAAGTGAAAAGAGGACCATGGTCTCCCGAAGAAGACGCCACCCTCAAGAACTACCTCCACGAACATGGCACCACTGGCAATTGGATTACTCTACCAACCAAAGCAGGCCTGAATCGTTGCGGTAAGAGTTGTCGTTTGAGATGGCTGAACTATCTTAGGCCAGACATCAAGCGTGGTACTTTCACGGAGATAGAAGACAATGTTATCTGCACTCTCTTTAGAAGCATTGGAAGCAGGCAAGTGAATGACTATGGCACTCATATATGGTGGTCTGTCATAGCTTCTCAACTGCCAGGACGAACAGATAATGATGTGAAAAACTATTGGAACACAAAGTTGAAGAAAAAGCTGCTGGCGGTTGCTGCAAGA…	MGRAPCCDKSKVKRGPWSPEEDATLKNYLHEHGTTGNWITLPTKAGLNRCGKSCRLRWLNYLRPDIKRGTFTEIEDNVICTLFRSIGSRQVNDYGTHIWWSVIASQLPGRTDNDVKNYWNTKLKKKLLAVAARNNIVAARRTCDHNIADQFSAPVPPKIETPHGPKTSSCLGGTLPYAANISLVHSFDQPKQTFEPWCNHSDSKPMEVSDFGSTSESNSFSIPLSHQEVSRLPSSSSLAQLDQYHCSLWSGHEGINYVNSEFLMDFGFETPSADQFLLGGFGH
134		Rmu_sc0006463.1_g000019.1 /fd	ATGGAAGGCAAAAGGGAAGAAGGTATAAGAAAAGGACCATGGAAAGCAGAGGAGGATGAAGTGCTTCTCAACCATGTGAAGAAATGTGGCCCTAGAGACTGGAGCTCCATTCGATCCAAAGGCCTCTTGCAGCGTACTGGAAAGTCCTGCCGTCTCCGTTGGGTTAATAAGCTTCGACCCAACTTGAAGAATGGGTGCAAATTTTCACTAGAGGAGGAGAGGGTGGTAATAGAGTTGCAAGCGCAATTTGGGAACAAATGGGCAAAAATAGCAACACATTTGCCTGGAAGAACTGACAATGATGTCAAGAACTTTTGGAGTAGCAGGCAGAAGAGACTGGCTAGGATTCTGCAGACATCTACAGCAGCAATCACACCCTCCAAATCACACAAAAACAGA…	MEGKREEGIRKGPWKAEEDEVLLNHVKKCGPRDWSSIRSKGLLQRTGKSCRLRWVNKLRPNLKNGCKFSLEEERVVIELQAQFGNKWAKIATHLPGRTDNDVKNFWSSRQKRLARILQTSTAAITPSKSHKNRREISVYHDEVPTLEESEYRDNAKHFFFKEIPKFSCSSEGESSSQAASCSSPCIGNSDAIQMVPLPDLLDSKLLGFEANPVQQELALPEKNLWIESQPLIPFLENPQPQTDLEFSSDTQELLKLDFDMFTSLDAELSKQLDVEPPFLEPVGSCGNVEGEKIDNPITPDCVFDDFPADMFDQIEPLPNGSNPSDD
135		Rmu_sc0002640.1_g000007.1 /pd	ATGGAAGGCAAAAGGGAAGAAGGTATAAGAAAAGGACCATGGAAAGCAGAGGAGGATGAAGTGCTTCTCAACCATGTGAAGAAATGTGGCCCTAGAGACTGGAGCTCCATTCGATCCAAAGGCCTCTTGCAGCGTACTGGAAAGTCCTGCCGTCTCCGTTGGGTTAATAAGCTTCGACCCAACTTGAAGAATGGGTGCAAATTTTCACTAGAGGAGGAGAGGGTGGTAATAGAGTTGCAAGCGCAATTTGGGAACAAATGGGCAAAAATAGCAACACATTTGCCTGGAAGAACTGACAATGATGTCAAGAACTTTTGGAGTAGCAGGCAGAAGAGACTGGCTAGGATTCTGCAGACATCTACAGCAGCAATCACACCCTCCAAATCACACAAAAACAGA…	MEGKREEGIRKGPWKAEEDEVLLNHVKKCGPRDWSSIRSKGLLQRTGKSCRLRWVNKLRPNLKNGCKFSLEEERVVIELQAQFGNKWAKIATHLPGRTDNDVKNFWSSRQKRLARILQTSTAAITPSKSHKNRREISVYHDEVPTLEIPKFSCSSEGKSSSQAASCSSPCIGNSDAIQMVPLPDLLDSKLLGFEANPVQQELALPEKNLWIESQLHSPNYFQKVYNASQSPFELHTCTLAAPSDLHGHALSTTFEIYAQASAASPSVNGHTSATPGDKIMNPTNYKTMISLIPPRVRRQSNETLDATTDRVFSPFHSQQDPTRITCLRDLGDWELGGRSHARRALSDHFAVHSRCLPKKIKSPPKRTIDWGLGRLVDVT
136		Rmu_co8432707.1_g000001.1 /fd	ATGAAGGAGAGGCAGCGTTGGAGACCTGAAGAGGATGCATTGTTGCGTGCATATGTGAAACAATATGGACCAAGGGAGTGGAACCTTGTATCACAGCGCATGAACACACCCCTAAACAGGGACGCCAAATCTTGCTTAGAAAGGTGGAAGAATTATCTAAAACCAGGCATCAAGAAAGGATCTCTTACTGAAGAGGAACAGCGTCTTGTCATTTGCCTTCAAGAGAAACACGGTAATAAATGGAAGAAAATCGCTGCTGAGGTCCCTGGTCGTACTGCTAAAAGATTAGGCAAGTGGTGGGAAGTGTTCAAAGAGAAGCAGCAGAGAGAACAGAAGAACAACAAGACAGTTGTTCAGCCTATTGAGGAGGGCAAGTACGATAGGATTCTTGAAACTTTT…	MKERQRWRPEEDALLRAYVKQYGPREWNLVSQRMNTPLNRDAKSCLERWKNYLKPGIKKGSLTEEEQRLVICLQEKHGNKWKKIAAEVPGRTAKRLGKWWEVFKEKQQREQKNNKTVVQPIEEGKYDRILETFAEKLVKERPAPAYLMATSKGAFLHNEVSPAPSMLPPWLSNSNVTSHVRPPSPSVTLSLSPTVAPSRASPPIPWLQPDRGPENSSFVLSNLPPPGSVPCGENFVISELVECSRELEEVHHAWAAHKKEASWRLRRVELQLESEKACRKREKMDEIEAKVKALREEQKAALDRIEAEYREQIAGLRRDAELKEQKLADQWSAKHMRLTKFLEQMGGRPRLAEPNGR
137		Rmu_sc0003332.1_g000018.1 /fd	ATGAAGGAGAGGCAGCGTTGGAGACCTGAAGAGGATGCATTGTTGCGTGCATATGTGAAACAATATGGACCAAGGGAGTGGAACCTTGTATCACAGCGCATGAACACACCCCTAAACAGGGACGCCAAATCTTGCTTAGAAAGGTGGAAGAATTATCTAAAACCAGGCATCAAGAAAGGATCTCTTACTGAAGAGGAACAGCGTCTTGTCATTTGCCTTCAAGAGAAACACGGTAATAAATGGAAGAAAATCGCTGCTGAGGTCCCTGGTCGTACTGCTAAAAGATTAGGCAAGTGGTGGGAAGTGTTCAAAGAGAAGCAGCAGAGAGAACAGAAGAACAACAAGACAGTTGTTCAGCCTATTGAGGAGGGCAAGTACGATAGGATTCTTGAAACTTTT…	MKERQRWRPEEDALLRAYVKQYGPREWNLVSQRMNTPLNRDAKSCLERWKNYLKPGIKKGSLTEEEQRLVICLQEKHGNKWKKIAAEVPGRTAKRLGKWWEVFKEKQQREQKNNKTVVQPIEEGKYDRILETFAEKLVKERPAPAYLMATSKGAFLHNEVSPAPSMLPPWLSNSNVTSHVRPPSPSVTLSLSPTVAPSRASPPIPWLQPDRGPENSSFVLSNLPPPGSVPCGENFVISELVECSRELEEVHHAWAAHKKEASWRLRRVELQLESEKACRKREKMDEIEAKVKALREEQKAALDRIEAEYREQIAGLRRDAELKEQKLADQWSAKHMRLTKFLEQMGGRPRLAEPNGRFLITSTFCVLPGLMNIR
138		Rmu_co8296705.1_g000001.1 /partial/fd	ATGGCACATAATGGTATCAATGACATCAATGGCACTGCCATGTACGGCGAGGGAAACCCCTCGGAATTGAGCTGCGTATTTATGGGGGGCAATAATATGGGCCTGAGGAAAGGTCCATGGACGGCGGTGGAGGATCGAATTCTGATGGAGTACGTGAGCAAACAGGGCGAAGGGAACTGGAATTCGGTGCAATGGAATTCCGGACTCAAGCGTTGCGGCAAGAGTTGCAGGCTCCGGTGGGCTAATCATCTCCGCCCTAATTTGAAGAAAGGTGCATTCACACCCGAGGAAGAGAGACTCATTCTTGAACTCCACGCCAAATACGGCAACAAATGGGCACGCATGGCCTCTCAG	MAHNGINDINGTAMYGEGNPSELSCVFMGGNNMGLRKGPWTAVEDRILMEYVSKQGEGNWNSVQWNSGLKRCGKSCRLRWANHLRPNLKKGAFTPEEERLILELHAKYGNKWARMASQ
139		Rmu_sc0022726.1_g000008.1 /fd	ATGAAGGAGAGGCAGCGTTGGAGACCTGAAGAGGATGCATTGTTGCGTGCATATGTGAAACAATATGGACCAAGGGAGTGGAACCTTGTATCACAGCGCATGAACACACCCCTAAACAGGGACGCCAAATCTTGCTTAGAAAGGTGGAAGAATTATCTAAAACCAGGCATCAAGAAAGGATCTCTTACTGAAGAGGAACAGCGTCTTGTCATTTGCCTTCAAGAGAAACACGGTAATAAATGGAAGAAAATCGCTGCTGAGGTCCCTGGTCGTACTGCTAAAAGATTAGGCAAGTGGTGGGAAGTGTTCAAAGAGAAGCAGCAGAGAGAACAGAAGAACAACAAGACAGTTGTTCAGCCTATTGAGGAGGGCAAGTACGATAGGATTCTTGAAACTTTT…	MKERQRWRPEEDALLRAYVKQYGPREWNLVSQRMNTPLNRDAKSCLERWKNYLKPGIKKGSLTEEEQRLVICLQEKHGNKWKKIAAEVPGRTAKRLGKWWEVFKEKQQREQKNNKTVVQPIEEGKYDRILETFAEKLVKERPAPAYLMATSKGAFLHNEVSPAPSMLPPWLSNSNVTSHVRPPSPSVTLSLSPTVAPSRASPPIPWLQPDRGPENSSFVLSNLPPPGSVPCGENFVISELVECSRELEEVHHAWAAHKKEASWRLRRVELQLESEKACRKREKMDEIEAKVKALREEQKAALDRIEAEYREQIAGLRRDAELKEQKLADQWSAKHMRLTKFLEQMGGRPRLAEPNGRGQGSTKPVCSWVESPASGLQRCPEPAVAGVVAAHKPATPTSF…
140		Rmu_sc0008246.1_g000001.1 /partial/pd	ACACGAATATATTCCATCAAGCCGTAATTGAGGTTAATGAAGATGGCACAACTGCGGCAGCTGCTACTGTTGCCATATGGGTTGGGGCTTCTGCTCCGCCGCCTCAAGAGATACAAGACTTTGTGGCCGATCACCCATTCATGCTATTCTCATCAGAGAAGGTGGTGGAACGCTCTCTGTGTTTCTGTCTCGCGGGGTCGTCGTCGTCGTCCTCTCGTCCCACGCCCACCAAGTATGGTGCCGAAATGAAGGAGCGGCAGCGCTGGCAACCCGAAGAAGACGCCCTCCTCCGCGCCTACGTGAAGCAGTATGGCCCCAAAGAATGGGCCCTCGTCTCCCAGCGCATGGCCCAGCCCATCAACCGCGACCCGAAGTCCTGCCTCGAGCGCTGGAAGAATT…	TNIFHQAVIEVNEDGTTAAAATVAIWVGASAPPPQEIQDFVADHPFMLFSSEKVVERSLCFCLAGSSSSSSRPTPTKYGAEMKERQRWQPEEDALLRAYVKQYGPKEWALVSQRMAQPINRDPKSCLERWKNYLRPGLKKGSLSPEEQSLVIQLQAKYGNKWKKIAAELPGRTPKRLGKWWEVFREKQLKHKPGSSSAAAAAGASQASTAASSSSTQPPEGSIPVAAGISSPEKAAQGPYDHILETFAEKYVQPKLYGMMSEPDPLLSLGSAAATPSVLPPWMNPPSATSSTSSTTPSPSVSLSLSPSDPGYDPDPTRVQMGTLVQWCKEVEEGRQSWVQHKKEATWRLSRLEQQLESEKARKRREAMEEIEAKIRALREEEMAFMGRIESDYREQMSV…
141		Rmu_sc0002045.1_g000038.1 /pd	ATGTTTCTCTATGCACTTGCTTCTTCCGGATGCAAGAAATGGGCTGCCGGCTCTGGTCGAGAGGCATCCTGTGTTTTGGAGAAACTAGGGCTGGGGGGTGTTGGTGCCAACACGAATATATTCCATCAAGCCGTAATTGAGGTTAATGAAGATGGCACAACTGCGGCAGCTGCTACTGTTGCCATATGGGTTGGGGCTTCTGCTCCGCCGCCTCAAGAGATACAAGACTTTGTGGCCGATCACCCATTCATGCTATTCTCATCAGAGAAGGTGGTGGAACGCTCTCTGTGTTTCTGTCTCGCGGGGTCGTCGTCGTCGTCCTCTCGTCCCACGCCCACCAAGTATGGTGCCGAAATGAAGGAGCGGCAGCGCTGGCAACCCGAAGAAGACGCCCTCCTC…	MFLYALASSGCKKWAAGSGREASCVLEKLGLGGVGANTNIFHQAVIEVNEDGTTAAAATVAIWVGASAPPPQEIQDFVADHPFMLFSSEKVVERSLCFCLAGSSSSSSRPTPTKYGAEMKERQRWQPEEDALLRAYVKQYGPKEWALVSQRMAQPINRDPKSCLERWKNYLRPGLKKGSLSPEEQSLVIQLQAKYGNKWKKIAAELPGRTPKRLGKWWEVFREKQLKHKPGSSSAAGASQASTAASSSSTQPPEGSIPVAAGISSPEKAAQGPYDHILETFAEKYVQPKLYGMMSEPDPLLSLGSAAATPSVLPPWMNPPSATSSTSSTTPSPSVSLSLSPSDPGYDPDPTRVQMGTLVQWCKEAEEGRQSWVQHKKEATWRLSRLEQQLESEKARKRR…
142		Rmu_sc0000610.1_g000011.1 /fd	ATGAGGATCATGATAAAGGGCGGCGTGTGGAAGAACACGGAGGATGAGATCCTCAAGGCCGCCGTTATGAAGTACGGCAAGAACCAGTGGGCTCGAATCTCCTCCCTCCTCGTTCGCAAATCCGCCAAGCAGTGCAAGGCTCGCTGGTACGAGTGGCTCGATCCCTCCATCAAAAAGACCGAGTGGACTCGAGAAGAGGATGAGAAACTTCTTCATCTTGCTAAGCTTATGCCTACGCAGTGGAGAACAATTGCCCCAATCGTTGGTCGTACTCCATCTCAATGCCTTGAAAGGTACGAGAAGCTCCTTGATGCAGCCTGTGTCAAGGATGAGAACTATGAACCAGGTGATGATCCCCGAAAATTGCGGCCTGGAGAGATTGACCCCAATCCTGAGTCT…	MRIMIKGGVWKNTEDEILKAAVMKYGKNQWARISSLLVRKSAKQCKARWYEWLDPSIKKTEWTREEDEKLLHLAKLMPTQWRTIAPIVGRTPSQCLERYEKLLDAACVKDENYEPGDDPRKLRPGEIDPNPESKPARPDPVDMDEDEKEMLSEARARLANTRGKKAKRKAREKQLEEARRLASLQKRRELKAAGIDNRQRKRKRKGIDYNAEIPFEKKPPPGFYDVADEDRPVDQPQFPTTIEELEGKRRVDVEAQLRKQDIAKNKIAQRQDAPSAILQANKLNDPETVRKRSKLMLPAPQISDHELEEIAKMGYANDLAGSELTEGSGATRALLANYAQTPRLGMTPSRTPQRTPAGKGDAIMMEASNLAMLRESQTPLLGGENPQLHPSDFSGVTPR…
143		Rmu_sc0013983.1_g000008.1 /fd	ATGAGGATCATGATAAAGGGCGGCGTGTGGAAGAACACGGAGGATGAGATCCTCAAGGCCGCCGTTATGAAGTACGGCAAGAACCAGTGGGCTCGAATCTCCTCCCTCCTCGTTCGCAAATCCGCCAAGCAGTGCAAGGCTCGCTGGTACGAGTGGCTCGATCCCTCCATCAAAAAGACCGAGTGGACTAGAGAAGAGGATGAGAAACTTCTTCATCTTGCTAAGCTCATGCCTACGCAGTGGAGAACAATTGCCCCAATCGTTGGTCGTACTCCATCTCAATGCCTTGAAAGGTACGAGAAGCTCCTTGATGCAGCCTGTGTCAAGGATGAGAACTATGAACCAGGTGATGATCCCCGAAAATTGCGGCCTGGAGAGATTGACCCCAATCCTGAGTCT…	MRIMIKGGVWKNTEDEILKAAVMKYGKNQWARISSLLVRKSAKQCKARWYEWLDPSIKKTEWTREEDEKLLHLAKLMPTQWRTIAPIVGRTPSQCLERYEKLLDAACVKDENYEPGDDPRKLRPGEIDPNPESKPARPDPVDMDEDEKEMLSEARARLANTRGKKAKRKAREKQLEEARRLASLQKRRELKAAGIDNRQRKRKRKGIDYNAEIPFEKKPPPGFYDVADEDRPVDQPQFPTTIEELEGKRRVDVEAQLRKQDIAKNKIAQRQDAPSAILQANKLNDPETVRKRSKLMLPAPQISDHELEEIAKMGYANDLAGSELTEGSGATRALLANYAQTPRLGMTPSRTPQRTPAGKGDAIMMEASNLAMLRESQTPLLGGENPQLHPSDFSGVTPR…
144		Rmu_sc0002888.1_g000048.1 /fd	ATGGGGAGAAGCAGTACTTACTATGATAAGAATGATGGACTGAAGAAAGGAGCCTGGGCTGCAAGTGAAGACCAGATTGTCAAAGCCTACGTCAAAAAACACGGTCTGAAGAGATGTGGGAAGAGTGTGAGACTCAGGTGGTTGAACTATCTGAGGCCTGATATCATCAAAGGCAACATTACAGAAGATGAAGAAGAGCTCATCATCAGGCTCCACAAACTCCTGGGAAACAGATGGTCATTGATAGCCGGAAGGTTACCAGGGCGAACTGACAACGAAATAAAAAACTACTGGAATTCCACCTTAAAGAGGAAGCTACAAGAAGAAAATCAGTTAGAAGTGTCTAAAGATGAGGAGATCAAGGAGGGCTTGTCATCCTCTGCCGCTGATGAGGACGAC…	MGRSSTYYDKNDGLKKGAWAASEDQIVKAYVKKHGLKRCGKSVRLRWLNYLRPDIIKGNITEDEEELIIRLHKLLGNRWSLIAGRLPGRTDNEIKNYWNSTLKRKLQEENQLEVSKDEEIKEGLSSSAADEDDPHLTKDNVIEDEDHRRQHHDVDVGVGVGVGVEATNNNGTGDDEYLRDDLWWNNFIMDFNATQLDVSEFQTDFPEI
145		Rmu_sc0004721.1_g000002.1 /fd	ATGAAGCTGGAAATGGAAATTCTATCCCCTTCATCCTATTTCTCAGCCTCGAATTGGCTCCTTGAGGAGACCAAGAGCTCGAAATGGACTCCAGCGGAGAACAAGATGTTCGAAAACGCCTTGGCCTTGCACGACAAGGATACGCCGGACCGGTGGCACAAGGTGGCGGCGATGATACCTGGGAAGACGGTAGGGGATGTGGTGAAGCAGTACAAGGAGTTGGAAGCTGATGTGGGAAAAATCGAGGCGGGGCTAGTCCCTATTCCGGGATATGGTACCTCCCCATTCACATTGGAATGGGTGAATAGGCATGGCTACGATGGATTCAAACAAACTTATGGGATTGGTGGCAAGAGATCTTCATCAACTAGACCTGCTGATCATGAAAGAAAGAAAGGA…	MKLEMEILSPSSYFSASNWLLEETKSSKWTPAENKMFENALALHDKDTPDRWHKVAAMIPGKTVGDVVKQYKELEADVGKIEAGLVPIPGYGTSPFTLEWVNRHGYDGFKQTYGIGGKRSSSTRPADHERKKGVPWTEDEHKLFLMGLKKYGKGDWRNISRNFVVTRTPTQVASHAQKYFIRQHSGGKDKRRASIHDITTVNLSETRTPSPDNKPPSPPDHHHSAAFPQQPNSARIPPFQWHQGGNGANMAFGQAHGNMFMSSTYGVGSYGLNKSAVHESYYAPQNMVFQMQSAQHYPHG
146		Rmu_sc0014485.1_g000006.1 /pd	ATGTACAGCTTAAAGAAATTGAGATTGCTTTGGCTTGTGGTTTTTTATATTGACTTGGCGGTCATCATCATCATCATCATGGCACATAATGGTATCAATGACATCAATGGCACTGCCATGTACGGCGAGGGAAACCCCTCGGAATTGAGCTGCGTATTTATGGGGGGCAATAATATGGGCCTGAGGAAAGGTCCATGGACGGCGGTGGAGGATCGAATTCTGATGGAGTACGTGAGCAAACAGGGCGAAGGGAACTGGAATTCGGTGCAATGGAATTCCGGGCTCAAGCGTTGCGGCAAGAGTTGCAGGCTCCGGTGGGCTAATCATCTCCGCCCTAATTTGAAGAAAGGTGCATTCACACCCGAGGAAGAGAGACTCATTCTTGAACTCCACGCCAAA…	MYSLKKLRLLWLVVFYIDLAVIIIIIMAHNGINDINGTAMYGEGNPSELSCVFMGGNNMGLRKGPWTAVEDRILMEYVSKQGEGNWNSVQWNSGLKRCGKSCRLRWANHLRPNLKKGAFTPEEERLILELHAKYGNKWARMASQNLHLIQCSKLKKARLWLLELIKRDISIKKLKMPIKFTAKALGLQDVPGGGGGFLVSKQTPLQVMACSSKKKRGRPLGARNKNPSKSSKVSAEDVLSVLYSGNPPSRNPKGKEKV
147		Rmu_sc0001211.1_g000005.1 /fd	ATGGGGGAAAGCAGTACGTGCTATGATAAGAACGAGGGACCGAAGAAAGGAGCCTGGGCTGCAAGTGAAGACCAGATTGTCATAGACTACGTCAAAAAACATGGTGTAGGAAAATGGGGCAAATTATCTAGGGAAACAGGTCTGAAGAGATGTGGGAAGAGTGTGAGGCTTAGGTGGCTGAATTATCTGAGGCCTGGTATCGTTAGAGGCAACATTACAGAAGATGAAGAAGAGCTCATCATCAGACTCCACAAACTCTTGGGCAACAGGATACCAGGGCGAACTGATAATGAAATAAAAAACTACTGGAATTCCTGCTTAAAGAGGAAGCTACAACAACAAAACCACTTGGCAGTGCCTAGAAATGAGGAGATCAGGGAGGACTTGTCATCCTCTGCT…	MGESSTCYDKNEGPKKGAWAASEDQIVIDYVKKHGVGKWGKLSRETGLKRCGKSVRLRWLNYLRPGIVRGNITEDEEELIIRLHKLLGNRIPGRTDNEIKNYWNSCLKRKLQQQNHLAVPRNEEIREDLSSSAAVAAAAEKNPHLTGNNVNEDEDYHQHHDVDFGVGIEFEATDNNNGTGDDEHLRDDLWWNNFIMDLNDIQLDASEFQPDFPEIRLGNLW
148		Rmu_sc0003404.1_g000004.1 /fd	ATGTTCCAGGAGGCGGCGCCGCCGTGTTGGCCGGCGGGGGTGAGTCATTCGACGTCGTCGTCGGCGCGGTGGACTCGACCGGAGGACAAGCTGTTCGAGCAGGCGCTGGTGAGGTTCTCTGAGGACTTGCCGGATCGGTGGGAGCGGATCGCCGAGATGGTGCCGGGGAAGAGCGCCGAGGAGGTTCTGGAGCACTATGAGACTCTGGTGCATGATGTTGTGGAGATTGACTCCGGCCGGGTCGAGTTGCCGAGTTACGCTGATGACTCGGTGGTCGGGTGGGACACGTCGAGTCAGATCTCTTTTGATGGTTGCAAGAATAGCAATAATAACGGCGGCGGCGGTGAGGCGGCCGAGAGGAAGAAGGGAAAGCCGTGGACTGAAATTGAACACAAATTG…	MFQEAAPPCWPAGVSHSTSSSARWTRPEDKLFEQALVRFSEDLPDRWERIAEMVPGKSAEEVLEHYETLVHDVVEIDSGRVELPSYADDSVVGWDTSSQISFDGCKNSNNNGGGGEAAERKKGKPWTEIEHKLFLVGLKQFGKGDWRSISRNVVVTRTPTQVASHAQKYFLRQSSGKKERKRSSIHDITSVETNSVPAPAERKWIPPPPPPPGDQGGSFAFPDFGFPK
149		Rmu_sc0002888.1_g000051.1 /fd	ATGGTGATGAGAAGCAGTACTTACTATGATAAGAATGATGGACTGAAGAAAGGAGCCTGGGCTGCAAGTGAAGACCAGATTGTCAAAGCCTACGTCAAAAAACACGGTCTGAAGAGATGTGGGAAGGGTGTGAGACTCAGGTGGTTGAACTATCTGAGGCCTGATATTATCAAAGGCAACATTACAGAAGATGAAGAAGAGCTCATCATCAGGCTCCACAAACTCCTGGGAAACAGATGGTCATTGATAGCCGGAAGGATACCAGGGAGAACTGACAATGAAATCAAAAACTACTGGAATTCCACCTTAAAGAGGAAGCTACAACAAGAAAATCACTTAGAAGTGTCCAAAGATGAGGAGATCAAGGAGGACTTGTCATCCTCTGTCGTTGTTGCCGCT…	MVMRSSTYYDKNDGLKKGAWAASEDQIVKAYVKKHGLKRCGKGVRLRWLNYLRPDIIKGNITEDEEELIIRLHKLLGNRWSLIAGRIPGRTDNEIKNYWNSTLKRKLQQENHLEVSKDEEIKEDLSSSVVVAAATDEDAPRLTKNNVIEDEDHHRQHHDADVGGGVAAEATNNKGTGDDEYLRDDLWWNNFIMDFNDSQFDVSEFQNDIPEI
150		Rmu_sc0000142.1_g000001.1 /partial/fd	TCAAATTGGTTGTTTCAAGAAAGCAAAGGTGCCGAGTGGACCGCAGAAGAGAACAAGCGATTCGAAAATGCTCTTGCTCTGTATGATAAGGACACCCCCGATCGATGGCACAAGGTGGCTTCTTGGATCCCTGGAAAGACCGTAGGCGATGTGATCAAGCAGTACAAGGAGTTGGAAGAAGATGTCAGTGATATTGAGGCTGGTCTTATCCCAATTCCTGGGTATTCTAGTAATAATTCTTTCACATTGGAGTGGGCTGACGATCAAGGCTTCGATGGATTGAAGCAATATTATAGTACTGTTGGTGGCAAGAGAGGCTCGTCGACTCGGCCGTCTGAGCAAGAAAGAAAGAAAGGTGTACCATGGACTGAAGAAGAGCACAGGCAATTTCTGATGGGA…	SNWLFQESKGAEWTAEENKRFENALALYDKDTPDRWHKVASWIPGKTVGDVIKQYKELEEDVSDIEAGLIPIPGYSSNNSFTLEWADDQGFDGLKQYYSTVGGKRGSSTRPSEQERKKGVPWTEEEHRQFLMGLKKYGKGDWRNISRNFVTSRTPTQVASHAQKYYIRQLTGGKDKRRSSIHDITTVNLSDTKSGSQESNQSNTKSPPSQDHDSAVAVQSQQHAKVSNKQQFDWKVSKEGPQMVFNSMNGNAIIGPFFGISSHVPKIEEQDFFIGNTFHGSQFDHHNVRFEMQYQ
151		Rmu_sc0003267.1_g000043.1 /fd	ATGTATAGGGGAATTGAAGTTCTATCTCCAGCCTCCTATCTCCAAACTTCAAATTGGTTGTTTCAAGAAAGCAAAGGTGCCGAGTGGACCGCAGAAGAGAACAAGCGATTCGAAAATGCTCTTGCTCTGTATGATAAGGACACCCCCGATCGATGGCACAAGGTGGCTTCTTGGATCCCTGGAAAGACCGTAGGCGATGTGATCAAGCAGTACAAGGAGTTGGAAGAAGATGTCAGTGATATTGAGGCTGGTCTTATCCCAATTCCTGGGTATTCTAGTAATAATTCTTTCACATTGGAGTGGGCTGACGATCAAGGCTTCGATGGATTGAAGCAATATTATAGTACTGTTGGTGGCAAGAGAGGCTCGTCGACTCGGCCGTCTGAGCAAGAAAGAAAG…	MYRGIEVLSPASYLQTSNWLFQESKGAEWTAEENKRFENALALYDKDTPDRWHKVASWIPGKTVGDVIKQYKELEEDVSDIEAGLIPIPGYSSNNSFTLEWADDQGFDGLKQYYSTVGGKRGSSTRPSEQERKKGVPWTEEEHRQFLMGLKKYGKGDWRNISRNFVTSRTPTQVASHAQKYYIRQLTGGKDKRRSSIHDITTVNLSDTKSGSQESNQSNTKSPPSQDHDSAVAVQSQQHAKVSNKQQFDWKVSKEGPQMVFNSMNGNAIIGPFFGISSHVPKIEEQDFFIGNTFHGSQFDHHNVRFEMQYQ
152		Rmu_sc0007525.1_g000007.1 /fd	ATGGGGGAAAGCAGTACGTGCTATGATAAGAACGAGGGACCGAAGAAAGGAGTCTGGGCTGCAAGTGAAGACCAGATTGTCAAAGACTACGTCAAAAAACATGGTGTGGGAAAATGGGGCAAATTATCTAGGGAAACAGGTCTGAAGAGATGTGGGAAGAGTGTGAGGCTTAGGTGGCTGAATTATCTGAGGCCTGGTATCGTTAGAGGCAACATTACAGAAGATGAAGAAGAGCTCATCATCAGACTGCACAAACTCTTGGGCAACAGGATACCAGGGCGAACTGATAATGAAATAAAAAACTACTGGAATTCCCGCTTAAAGAGGAAGCTACAACAACAAAACCACTTGGAAGTGCCGGAAGTGCCTAGAAATAAGGAGATCAGGGAGGACTTGTCA…	MGESSTCYDKNEGPKKGVWAASEDQIVKDYVKKHGVGKWGKLSRETGLKRCGKSVRLRWLNYLRPGIVRGNITEDEEELIIRLHKLLGNRIPGRTDNEIKNYWNSRLKRKLQQQNHLEVPEVPRNKEIREDLSSSAAVAAAAEKNPHLTGNNVNEDEDYHQHHDVDFGVGIEFEATDNNNGTGDDEHLRDDLWWNNFIMDLNDIQLDASEFQPDFPEIRLGNLR
153		Rmu_sc0001753.1_g000003.1 /pd	ATGACTGTGGACGAAGCGGTTGCTAGCGCCTTGTGGACTTGGGAGCAGGATAAGGCATTTGAGAATGCCCTGGCAACTTATCCTGAGGATGCTCCAGATCGTTGGGACAAAATTGCAGCTGATGTAGAAGGGAAAAACCTAGAGGAGATAAAGCATCATTATGAACTCTTACTTGATGATATAAGCCAGATCGAAGCTGGTTGTATTCCACTGCCTTGCTACAATTCTTCTTCCGAGGGTTCAACAAGTCATGCCAGTGATGAAGGAACCAGTAAGAAGGGACACTACAGCAGCGAATCTAATCATGGAAGTAAGGCTTCAAGGGCAGATCAGGAACGCCGTAAGGGGATTGCTTGGACAGAGGATGAACACAGGCAATTTCTTCTAGGATTGGAAAAA…	MTVDEAVASALWTWEQDKAFENALATYPEDAPDRWDKIAADVEGKNLEEIKHHYELLLDDISQIEAGCIPLPCYNSSSEGSTSHASDEGTSKKGHYSSESNHGSKASRADQERRKGIAWTEDEHRQFLLGLEKYGKGDWRSISRNFVVTRTPTQVASHAQKYFIRLNSMNKDRRRSSIHDITSVNNGEIAAIQGPITGQGNGSAVGPSGSAKSTKQSAAGPPGVGMYGAPSIGQPIGGPLVSAVGTPVNLAGHSPHMAYGVRAPMPPGALVPGAPMNMPPMTYPMPHTAHSSSVWSVSEIVEAVNGRILKWGPVLLEPFLQTPEPSNPNQCFFAISGQNLDAHDCNYPEIKAARTGTLKPRLILWSDSLAVWERPYMIALVYESHGIGMTELGSLIGIP…
154		Rmu_sc0001482.1_g000009.1 /fd	ATGCAAACTCTGTACCCACCTTCATATATGGCCGATACTAATTGGTTTGTCCAAGGGAGCCAGAGCTCAGATTGGACTAGAGAAGAGAACAAGCAATTTGAGAGAGCTCTGGCTATCTACGATGAGAAAACGCCGGACCGGTGGGGAATGATTGCGTTGATGATTCCGGGGAAGACGGCTGTCGATGTGTTCAAGCAGTACAAGGAGCTGGAAGATGATGTTAGTGACATAGAAGCAGGGCTGGTCGAGATTCCAGGGTACCAACAGCCGTCTTCTTTCACATTGGAGTTGGTGGATGACCGAAATTTCGATGCTAACCGAAAGAGGTCTGCAGCAACTAGAGGTTCTGATCAGGAGAGGAAGAAGGGGATTCCTTGGACAGAAGATGAGCATCTGCGG…	MQTLYPPSYMADTNWFVQGSQSSDWTREENKQFERALAIYDEKTPDRWGMIALMIPGKTAVDVFKQYKELEDDVSDIEAGLVEIPGYQQPSSFTLELVDDRNFDANRKRSAATRGSDQERKKGIPWTEDEHLRFLKGLLKYGKGDWRNISRNFVFSKTPTQVASHAQKYFMRQHSGGKDKRRPSIHDITTVNLTSTTTTSPSQNNNRPPLDQSPPPEHNNKSTESPRVVPDWNMPNDGLAGAMIFGATHGDLFESSSPFDVGSPDDLKLHWQKLYASATHYAAHARSPSSMYLMQTSRHQIHG
155		Rmu_ssc0000013.1_g000001.1 /pd	ACAAAATTAACAAGCCATCTAAATACTGAAGATTTGACTCGAATAGTTCGGTTTCTTGATCACTGGGGAATTATCAATTACTCTGCTGCCGCACCAAGTCCTGAGCCTTGGAATGGTAATTCCTACTTAAGGGAGGAGCAAAATGGTGAGATTCATGTTCCATCAGCTGCGTTGAAGTCGATTGATAGTCTGATCAAATTTGACAAGCCCAGATGTAGGCTTAAAGCAGCTGATGTTTATAAGTCATTGTCCTGTCATGACGACGATGATGACACCTCTGATTTGGACAACAGAATTCGAAAACGTCTCTGTGAAAATCATTGCAATTATTGTTCGTGTTCTCTTCCCAGTGTATGCTATCAGTCACAGAAGGAGGTTGATGTACTGCTGTGCTCTGAC…	MKYGINEWDRISTLLNRKSAKQCNARWFQWLEPSIKKVEWTREEDEKLLHLAKLMSSQWRTIAKNVNGRTASQCIERYEKLLDAACNDNYEDPRRLRAGEIDPNPETRPARPDPVDMDEDEKEMLSEARARLANTKGKKAKRKAREAQLEEARRIASLQKRRELKAAGIDDKSTWNQQKRKRNGIDYSAEIPFEKNPPLGFYNVGDEDREVVLEQHDQFPLTIEELEGKRRVDVEAELRKQDIAKNKISNKLNIDDFSNVEDVGDEDRKVVLEQHDQFPLTIEELEGKRRVDVEAELRKQDIAKNKISNKLNVDDFSNVETVRKRSKLMLPAPQISDIELEEIAKMSNAGDLVGSENGFTDATYFGVTHATRRLGLTPSKGTVIRDELHINEGIDKDDG…
156		Rmu_ssc0000215.1_g000024.1 /fd	ATGGAACCGTTTTCATTCTTCCCTACTGCTCCTTCTCCACCTTTCCCTTCTTCTTCTTCCTCAGCTTTATTGGAATCTACAGCCCAGCTTGCAGAAGACGGTGATCAGTGGACTTTCGAAGAGAACAAGAGGTTTGAGACTGCACTCGCGGAGTTTGATCTTGGTGCCCCGGACCTGTTTGATAACATACAGACTAGGGTTCCTGGGAAAACTCTATGGGAAATCAAGAAACACCTTGATGATTTGTTTGAAGACATTGAGAAGATTGAGACGGGTATTATACCGATACCCGACTACAAGACTACTCCAACTCAGGTGAAATCAAATCCTAGGTCTCAGCCTAGAAAGAAAGGTGTTATATGGACTGAGGAAGAACATAAGTTGTTCCTTCAGGGCTTG…	MEPFSFFPTAPSPPFPSSSSSALLESTAQLAEDGDQWTFEENKRFETALAEFDLGAPDLFDNIQTRVPGKTLWEIKKHLDDLFEDIEKIETGIIPIPDYKTTPTQVKSNPRSQPRKKGVIWTEEEHKLFLQGLKIYGKGDWKSISRHCVMSRNPTQVASHAQKYFLRLQNSAESEQNANGECSTSNNKL
157		Rmu_sc0002483.1_g000001.1 /fd	ATGGGAAACAAGGGTTCAGGTTCTATAGCAGAAGATATGAGAAAGGACTTGACGTTGGTTTGGAGATATTACAAGAAGCTAGGGAAGGTTCGAAATTGCCTTGTTATTCCTGGAGGTTTTGATAAGTTATCCCTTGCTTGCTTCATTGCCTTCCTGGTGTTAGGGGAGGGTGTGGCTGCCCATGCAATTGGGTTGGTTTTGATGCCGCCAGAACCATTGTCGTGGGATCGGAAGGAGTTCTTGAAGGAGAGGAAGCACGAGAGGTCGGAGTCGCTGGGGCCGGTGGCGCGATGGAGGGACTCGCCTCATCACGCGCCGAGGGAGTTCAACAACCGCTGGCAGTCCGCCGAGTTTCGCAGACCGCCAGGTCATGGTAAACAGGGTGGTTGGCACATGTTT…	MGNKGSGSIAEDMRKDLTLVWRYYKKLGKVRNCLVIPGGFDKLSLACFIAFLVLGEGVAAHAIGLVLMPPEPLSWDRKEFLKERKHERSESLGPVARWRDSPHHAPREFNNRWQSAEFRRPPGHGKQGGWHMFSDDSGHGYASSRSSEKMLEDESFRPSFSRGEGRYGRNGRDSRGSYNQRDCKGHSWETSSLSPNTPGRPNDMNNEQRPQDDNMTYSSNPHSDFGSTWDQIQLKDHLDRTGGSNGVAAGQKCDRENSLGSMDWRHLKWSRSGSMSSRGSGFSHSSSSKSIGAIDSSEAKTESQPKNATPVQSPSGDATACVTSAAPSEETNSRKKPRLGWGEGLAKYEKKKVDPADVIMNKDGAVCPVGNMEFSSHLADKSPRVTMLSDCASPATPSS…
158		Rmu_sc0004404.1_g000011.1 /pd	ATGGCCTTGATTAGCAATTGCATCGGCAACAAAGTTGGCATATCGAAGAATGTGGCTGAATCAGATGTTGTCAAAATTGGCCGCAAGATTGTTGATATCTCTTACCAAGGGCGTTACTGGACAACTGAAGACGATAAGAAACTGAAATATGCAGTGAAGAAAGTTGCTGCTCGTAAGGGAGGACACATCAAAGATTGGGAGAAAGTGGGTTTCATAGTCGGAAAAAGGGGAGAAAGGCGTTACTGGACAACTGAAGACGATAAGAAACTGAAATATGCAGTGAAGAAAGTTGCTGCTCGTAAGGGAGGACACATCAAAGATTGGAAGAAAGTGGCTTTCATAGTCGGAAAAAGGGGAGACCTCTGCAAAGACAGATGGCAGAATGTGGTTTCTCCAGAT…	MALISNCIGNKVGISKNVAESDVVKIGRKIVDISYQGRYWTTEDDKKLKYAVKKVAARKGGHIKDWEKVGFIVGKRGERRYWTTEDDKKLKYAVKKVAARKGGHIKDWKKVAFIVGKRGDLCKDRWQNVVSPDIKKGAWSKEEDQRLLNASASCGSNMLNTMLDVFNSSSVDGKIRTLHQCQARLQQLLNGNHSRKLEEKSVEQGNIAGLYQQKAEGVGDEGVADEGVVDEGVAYAQVADALTLLQNNYNGEEELEIGDGLTNLFKTYAEADAASGIAVHNECKLKFLELKTKRTYRSIVFKIEEKQKQVIVEATGDPTETYEAFTDSLPTDECCYAVFDFDLPIPEGVPKRQILFIAWLPDTSREENKKIYASALDSFKRELDGIQIELEATGPSEIG…
159		Rmu_co8520481.1_g000001.1 /fd	ATGGGGAGACCTCCTGCTTCTTGTGACAAACTGATCAATGTGAAGAAGGGCACTTGGACTGAAGAGGAAGATGCAAATATACTCGCTCATCATGTATCCAAGAATGGGATCGGACTTAATAGATGTGGGAAGAGTTGCAAGCCTAGGTGGAGTAACTACTTGAGGGCTAATCTGAAGCATGAAACCTTCACACCCCAAGAGGAAGAATTGATTGTTAGGCTTCATGCAACCATTGGTAGCAGGTGGCCTATAATAGCTCAACAACTTCCTGGGAGGACAGACAATGATGTGAAGACCTACTGGAACACTAAGCTGAAAAAGAAGCTCTCAGATATGGGAATTGATCCCGTTACTCACAAGCCCTTCTCTCAAATTTTAGCCGACTATGGAAACATTGGT…	MGRPPASCDKLINVKKGTWTEEEDANILAHHVSKNGIGLNRCGKSCKPRWSNYLRANLKHETFTPQEEELIVRLHATIGSRWPIIAQQLPGRTDNDVKTYWNTKLKKKLSDMGIDPVTHKPFSQILADYGNIGGLPKSGMRIGIGASLNKDLKNAMLMKSSEPYTSALSNFNNSHLVPTTKIEPMQATSSTKFDNYQPYDLLTQLQAMKYVTEVSNSTTNTNPAPSPVNFYSEGSLSSSSSSTSSSAAVQEKSPLAFGWSDFLLEDAFVPTEDARGAMPHGEIWDQATMQDNMAESSSKDMFHQAQTENVGMSYGMSSNQVEATADPCDSSFVEAMVAKENDLFLEFPELLLEEPFYY
160		Rmu_ssc0000119.1_g000038.1 /fd	ATGGGGAGACCTCCTGCTTCTTGTGACAAACTGATCAATGTGAAGAAGGGCACTTGGACTGAAGAGGAAGATGCAAATATACTCGCTCATCATGTATCCAAGAATGGGATCGGACTTAATAGATGTGGGAAGAGTTGCAAGCCTAGGTGGAGTAACTACTTGAGGGCTAATCTGAAGCATGAAACCTTCACACCCCAAGAGGAAGAATTGATTGTTAGGCTTCATGCAACCATTGGTAGCAGGTGGCCTATAATAGCTCAACAACTTCCTGGGAGGACAGACAATGATGTGAAGACCTACTGGAACACTAAGCTGAAAAAGAAGCTCTCAGATATGGGAATTGATCCCGTTACTCACAAGCCCTTCTCTCAAATTTTAGCCGACTATGGAAACATTGGT…	MGRPPASCDKLINVKKGTWTEEEDANILAHHVSKNGIGLNRCGKSCKPRWSNYLRANLKHETFTPQEEELIVRLHATIGSRWPIIAQQLPGRTDNDVKTYWNTKLKKKLSDMGIDPVTHKPFSQILADYGNIGGLPKSGMRIGIGASLNKDLKNAMLMKSSEPYTSALSNFNNSHLVPTTKIEPMQATSSTKFDNYQPYDLLTQLQAMKYVTEVSNSTTNTNPAPSPVNFYSEGSLSSSSSSTSSSAAVQEKSPLAFGWSDFLLEDAFVPTEDARGAMPHGEIWDQATMQDNMAESSSKDMFHQAQTENVGMSYGMSSNQVEATADPCDSSFVEAMVAKENDLFLEFPELLLEEPFYY
161		Rmu_sc0007406.1_g000007.1 /d	ATGAGGGAGTTGATTCGAAAGCAATACAAGAGCTGGACATCGAAGGAGGAAGAAGCCCTAGCAGCCGGGGTGCATAAGTACGGGAGCGGCAACTGGAAAACCATCCTCAAATATTCCAAATTTGCTCGTTACCTCGCTCGGAAGTCATGCGGTGACCTGTGGAAGAAATGGAGGACAATGGCATTTAGGGTTTCCAATGAGAAACTGAAGACCATGTCTCCCAAGGTAAAGAAGGTTGTGGCTGCCCGCCTGGAGGCCATTAATGATGGGAAAAACTCTGCTTTTGCTGAAAGAAAAGAGAGGGGTATAACGGGAAGCGGTTGGACGGTGGAGGAGGAAGAAGCCCTAGCCGCCGGGGTGGAAAAGTATGGGACGAACAAGTGGAAGCACATTCTCGAA…	MRELIRKQYKSWTSKEEEALAAGVHKYGSGNWKTILKYSKFARYLARKSCGDLWKKWRTMAFRVSNEKLKTMSPKVKKVVAARLEAINDGKNSAFAERKERGITGSGWTVEEEEALAAGVEKYGTNKWKHILEDPEFSPVLAIHPCTSLANKWRNLTDSVSEEKLRRMSCKVRKVMDASLRQKINDDQGEETERVSKMEEDTEESTMSTKVRKVVDDEVQNSANPNEAVKETERVPDHEMVEEDETLMMDVESSADRAEAVKENERILKMKEDAKSMLLLAKEIWGHCSTEDTNRVSAPACPQAVKESKRISEIAELDIDRFSAAPPPQAEKKTKIFSEMEEDTDRGPAPAPPKAVEETKRISDTAEDTKSMLLFMNQIYERFTQ
162		Rmu_sc0013358.1_g000003.1 /d	ATGAGGGAGTTGATTCGAAAGCAATACAAGAGCTGGACATCGAAGGAGGAAGAAGCCCTAGCAGCCGGGGTGCATAAGTACGGGAGCGGCAACTGGAAAACCATCCTCAAATATTCCAAATTTGCTCGTTACCTCGCTCGGAAGTCATGCGGTGACCTGTGGAAGAAATGGAGGACAATGGCATTTAGGGTTTCCAATGAGAAACTGAAGACCATGTCTCCCAAGGTAAAGAAGGTTGTGGCTGCCCGCCTGGAGGCCATTAATGATGGGAAAAACTCTGCTTTTGCTGAAAGAAAAGAGAGGGGTATAACGGGAAGCGGTTGGACGGTGGAGGAGGAAGAAGCCCTAGCCGCCGGGGTGGAAAAGTATGGGACGAACAAGTGGAAGCACATTCTCGAA…	MRELIRKQYKSWTSKEEEALAAGVHKYGSGNWKTILKYSKFARYLARKSCGDLWKKWRTMAFRVSNEKLKTMSPKVKKVVAARLEAINDGKNSAFAERKERGITGSGWTVEEEEALAAGVEKYGTNKWKHILEDPEFSPVLAIHPCTSLANKWRNLTDSVSEEKLRRMSCKVRKVMDASLRQKINDDQGEETERVSKMEEDTEESTMSTKVRKVVDDEVQNSANPNEAVKETERVPDHEMVEEDETLMMDVESSADRAEAVKENERILKMKEDAKSMLLLAKEIWGHCSTEDTNRVSAPACPQAVKESKRISEIAELDIDRFSAAPPPQAEKKTKIFSEMEVDTDRGPAPAPPKAVEETKRISDTAEDTKSMLLFMNQIYERFTQ
163		Rmu_sc0004404.1_g000004.1 /pd	ATGTCATATGCAAAGAAGTTGATCGAAATGGGGGCAGGGCGTTACTGGACAACTGAAGACGATAAGAAACTGAAATATGCAGTGAAGAAAGTTGCTGCTCGTAAGGGAGGACACATCAAAGATTGGAAGAAAGTGGCTTTCATAGTCGGAAAAAGGGGAGACCTCTGCAAAGACAGATGGCAGAATGTGGTTTCTCCAGATATAAAGAAAGGAGCTTGGAGCAAGGAGGAGGATCAAAGGCTCCTCAATGCCTCTGCTTCTTGTGATTCAAACATGTTGAATACTGTGCTTGATGTCTTCAATTCTTCTTCTGTGGATGGAAAGATCAGAACACTCCATCAATGCCAGGCTCGACTACAACAACTTTTGAATGGAAACCATTCCCGGAAGCTTGAAGAA…	MSYAKKLIEMGAGRYWTTEDDKKLKYAVKKVAARKGGHIKDWKKVAFIVGKRGDLCKDRWQNVVSPDIKKGAWSKEEDQRLLNASASCDSNMLNTVLDVFNSSSVDGKIRTLHQCQARLQQLLNGNHSRKLEEKSVEQGNIAGLYQQKAEGVGDEGVADEGVVDEGVAYAQVADALTLLQNNYNGEEELEIGDGLTNLFKTYAEADAASGIAVHNECKLKFLELKTKRTYRSIVFKIEEKQKQVIVEATGDPTETYEAFTDSLPTDECCYAVFDFDLPIPEGVPKRQILFIAWLPDTSREENKKIYASALDSFKRELDGIQIELEATGPSEIGLDVIRNRAAKHEP
164	3R	Rmu_sc0002881.1_g000007.1 /fd	ATGGCCTCAACATGGTTCTGCGGTGTAAATGAAGGCAGCTTAATAGCCCCAAAAAGCATTGGAGCTCCTGACAATTCTGAAAAATCGACCCCTAAAAAAGCATCAAAAAGAGTAAGTTTTGCTGATGATGTGGAGGTCTTCTCACCGTCTGATGGCCCAAACGATGAGCATGAAGACCTTGTAAGAGGTAAACGGTTTTCAGAAGAAGAAGACAAGATTGTGAAAGAGGCTGTTTTAAGATACATAGAGGAACATGCTTTAGGAGATGATGGCCTCAACATGGTTCTGCGGTGTAAATCCCACCCTGAAGTCAAAAACCACCCAGAATTGAAAAATTGTTGGAAGGATATTGGGGCAGCCTTACCATGGAGGCCCTTTAAGAGTGTATATTATAGAGCC…	MASTWFCGVNEGSLIAPKSIGAPDNSEKSTPKKASKRVSFADDVEVFSPSDGPNDEHEDLVRGKRFSEEEDKIVKEAVLRYIEEHALGDDGLNMVLRCKSHPEVKNHPELKNCWKDIGAALPWRPFKSVYYRAHILFERAEKRIWTPEEYEEVKKFHKDWGADWRTLGDKLGKHRIHVKDAWRRIKLPNQKKGRWSQEEYETLFDLVNMDLRMKVFEEKKTKHGILRDNICWEAISETLGTRTNAVCSMKWYNQLTSPLVSQKLWADIDDYRLLDALNSLDACCIEDVDWDDLLEHRPGDVCQKRWHQMVKHIGHHGLKSFPEQVEVLSKHYLADLIEAREIYASKPAVD
165		Rmu_sc0016065.1_g000002.1 /pd	ATGGGACATCACTCATGCTGCAACAAACAGAAAGTGAAGAGAGGGCTATGGTCCCCAGAAGAAGATGAAAAGCTCATAAACTACATTACGAATTACGGCCATGGCTGCTGGAGCTCAGTTCCTAAACTTGCAGGTCTCCAAAGATGTGGAAAGAGCTGCAGACTGAGATGGATAAATTATCTGAGACCAGACTTGAAACGTGGGAGCTTCTCTTCCCAGGAAGCTGCACTCATCATTCAACTCCATAGCATTTTAGGCAACAGTGGGGACATCGATGTTTCTGTAGCGTTCTGGCGGCGACGGCGGCGCTGGTCTTGCCAGACTGGGCCACGGGCATCCCAAACCGCTTCACCATGGAGATCGAGGTCGAAGGTTCTGGGCAGCGACCTCACCCAAACT…	MGHHSCCNKQKVKRGLWSPEEDEKLINYITNYGHGCWSSVPKLAGLQRCGKSCRLRWINYLRPDLKRGSFSSQEAALIIQLHSILGNSGDIDVSVAFWRRRRRWSCQTGPRASQTASPWRSRSKVLGSDLTQTSSQRVHKQEEGQASMSGKPSAPERCRSIDVRTFGAVWAQIAKHLPGRTDNEVKNFWNSSIKKKLIPHDVIPALASFSHFLNPSNAGSDQESFFTTLIANPNFGLQQEQPYLPFPTPLPPSSFYHGDHSILKLDYTNYSSNRLHFPTPIQLPSNYSSLYDSSWSLGYQPHLFDSNHQQDQILNNIEVAPHFNIGNELMVPSVASLPGYDHENLSVVPTMPQSCEINIDGSACRAMPFDPPDNHLPQELDSLAKVSSCFGPFGDHGSY…
166		Rmu_co8516861.1_g000001.1 /partial/fd	ATGTATCAGGATGAAATCTTGCGTAGGGCAGTTCAGAGTTTTAAAGGAAAGAATTGGAAGAAAATAGCGGAGTGTTTCAAGGATCGGACTGATGTGCAATGCCTGCATAGGTGGCAGAAAGTTTTGAATCCTGAATTGGTCAAGGGTCCATGGTCTAAAGAGGAGGACGAAATTATTGTTGAATTGGTCAAAAAGTATGGCCCAAAAAAGTGGTCCACTATTGCACAGCATTTACCTGGACGTATTGGTAAGCAATGCAGGGAAAGGTGGCATAATCATCTTAATCCTGGAATAAACAAAGAAGCATGGACGCAGGATGAGGAGTTGGCTCTGATTCGTGCTCATCAAATTTATGGGAACAAATGGGCAGAGCTAACAAAATTCTTGCCTGGAAGGACA…	MYQDEILRRAVQSFKGKNWKKIAECFKDRTDVQCLHRWQKVLNPELVKGPWSKEEDEIIVELVKKYGPKKWSTIAQHLPGRIGKQCRERWHNHLNPGINKEAWTQDEELALIRAHQIYGNKWAELTKFLPGRTDNAIKNHWNSSVKKKLDSYLKSGLLPDLEGTPHVGHQNQPIISSCSRVQNSGDDSAPRGAEGEEISECSQDSNVAGCFQSRTEMVNVVLHTRDRSHIREVSRLGNDPSSSPASCSEPYYPSMGDATFSIPEIPPEIVSSSKFIEQSFSHDAGESMSGDFQFNMQELTNISSLESEQGASGMHTHCMSSNEIHDVVNFPFQTAGAFPASTSMGNMADGSVKSERMLISDDECCRALFSEAINQGYFSRDFTNGLNMVDLIACTDSLL…
167		Rmu_sc0016854.1_g000006.1 /fd	ATGGTGAAAGTCAAAAGGGAACTAATAGAGGAGGCGGTTGTGCATTCAGACAGGAAATTTGGGGGAGTGTCGTGGCCATTATCTGAAGGCAATTGTGACTCGCCTGTTTCGGAGCCAAGCCCTCTTACTTGGAGAACCAGTGGTCCAACCAGGCGATCATCAAGATGCTGGACTGAGAAAGAGGATAAACTTCTGGTAGAGCTGGTCAGAAAGTTTAATGGGAGTAATTGGAAGCAAATAGCTGCAGGTATCCCTGGCCGTTCAGATGTTCAGTGCCTGCATCGCTGGCAAAAAGTTTTGAATCCTGAAATCATCAAGGGATACTGGACAAAGGAGGAAGATGATTGTATAATCAAACTGGTTGAAAAGTATGGTGCTAGAAGATGGTCTGTCATTGCA…	MVKVKRELIEEAVVHSDRKFGGVSWPLSEGNCDSPVSEPSPLTWRTSGPTRRSSRCWTEKEDKLLVELVRKFNGSNWKQIAAGIPGRSDVQCLHRWQKVLNPEIIKGYWTKEEDDCIIKLVEKYGARRWSVIAKFLPGRIGKQCRERWYNHLSPAINKDAWTEEEERILAFYHQQYGNKWAEIASFLPGRTDNAIKNYWNGAFKRKEDSYSPNSNEWDMHPDICIDELGSDLVGVKTVRQKFDNACSTEWTLGRSYGSEGKSVKSQKCMSSKTGPSGLINLHTTAESDYSIVATPLGVKSGSCKQIADHTGEYRPFPNSPLVFMDSSPSTNSNCTPPKIPLCYSTPTNSVQNVYASSTSPKSRLKSLARTFKNTPSIIRKRASRTADHANFSGASCSTA…
168		Rmu_sc0001809.1_g000041.1 /fd	ATGGACGGTGACAGAACAAATTCTACTGCAGAAGGGTCGGGTGGTGACAGTATTCAGAGAGCTCGAGCTCTCCATGGGAGGTCTAGTGGGCCTACAAGGCGTTCTACAAAAGGACAATGGACGCCTGAAGAGGATGAAATCTTGCGTAGGGCAGTTCAGAGTTTTAAAGGAAAGAATTGGAAGAAAATAGCGGAGTGTTTCAAGGATCGGACTGATGTGCAATGCCTGCATAGGTGGCAGAAAGTTTTGAATCCTGAATTGGTCAAGGGTCCATGGTCTAAAGAGGAGGACGAAATTATTGTTGAATTGGTCAAAAAGTATGGCCCAAAAAAGTGGTCCACTATTGCACAGCATTTACCTGGACGTATTGGTAAGCAATGCAGGGAAAGGTGGCATAAT…	MDGDRTNSTAEGSGGDSIQRARALHGRSSGPTRRSTKGQWTPEEDEILRRAVQSFKGKNWKKIAECFKDRTDVQCLHRWQKVLNPELVKGPWSKEEDEIIVELVKKYGPKKWSTIAQHLPGRIGKQCRERWHNHLNPGINKEAWTQDEELALIRAHQIYGNKWAELTKFLPGRTDNAIKNHWNSSVKKKLDSYLKSGLLPDLEGTPHVGHQNQPIISSCSRVQNSGDDSAPRGAEGEEISECSQDSNVAGCFQSRTEMVNVVLHTRDRSHIREVSRLGNDPSSSPASCSEPYYPSMGDATFSIPEIPPEIVSSSKFIEHSFSHDAGESMSGDFQFNMQELTNISSLESEQGASGMHTHCMSSNEIHDVVNFPFQTAGAFPASTSMGNMADGSVKSERML…
169		Rmu_ssc0000289.1_g000025.1 /pd	ATGTCGAGCTGGACCCGAGAAGAAGACAAGGCCTTCGAGAACGCAATCGCTTTGCATTGGATCGAGGACGATGAGGAATCATCGTGGGACAAGATAGCGTCTTTGGTTCCGAGCAAGAGCATGGAGGAGTTGAAACGACACTACCAAATGCTAGTGGAAGATGTGAGTGCAATTGTGTCAGGGAACATTCCGGTTCCTAATTATGGAGGGGAAGAAGCTACCACATCGGTGAGCAAGGAGAGCAGTAGTGCTCGGGCTTCTTCTTCTGGGGTTTCAGATAAGAGATTGAGTAGTGGCCATGGAAATGGAGGTGGGTTTTCGCCTTTGGGTCATGACTCGTCTGGTCATGGAAGTAAAGGAGGGTCCAGGTCAGACCAAGAAAGAAAGAAAGGGATTCCA…	MSSWTREEDKAFENAIALHWIEDDEESSWDKIASLVPSKSMEELKRHYQMLVEDVSAIVSGNIPVPNYGGEEATTSVSKESSSARASSSGVSDKRLSSGHGNGGGFSPLGHDSSGHGSKGGSRSDQERKKGIPWTEEEHSWTREEDKAFENAIALHWIEDDEESSWDKIASLVPSKSMEELKRHYQMLVEDVSAIVSGNIPVPNYGGEEATTSVSKESSSARASSSGVSDKRLSSGHGNGGGFSPLGHDSSGHGSKGGSRSDQERKKGIPWTEEEHRLFLLGLDKFGKGDWRSISRNFVISRTPTQVASHAQKYFIRLNSMNRDRRRSSIHDITSVNNGGDVPSHQAPITGQQSNAYAPSAAAIGPPSVKHRPHQPHMAGLGMYGAPMGHPVSAPPGHM…
170		Rmu_sc0000367.1_g000018.1 /fd	ATGGGAAGGAAGGAGAGGACACCGTTGGAGTTTGAATCAGGAAAAGAGAAGAAAAAGCACAAGGAGAAAAGGAAGGAGAAAGCGAAGAAGGATGAACTTGAAAGAAATTCTTTCGTGCTTGAAGTCTGTGGGGACAAAATGGGCAAGGAAGTTGAGGGGCTGAAATATGACAAGACTGGTGGAAATCATATGAATAGTGGAGAAGAAGCCAATAAGAAAAAGAAAAGGAGGAGGGAAAAGGAGGGGGATGATATGGTAATAGATATGATTAATAAAAAGGAGCTCATAAATGATGGGGAGAAATCCGTTGGGAAAACTGTGGAGAAAGTTGACTCTACAGGTAGTGTAAAGAAGACACAAAAAATTCTTGAGGATGGAAAAGTAGGTGTGGCAACTGAG…	MGRKERTPLEFESGKEKKKHKEKRKEKAKKDELERNSFVLEVCGDKMGKEVEGLKYDKTGGNHMNSGEEANKKKKRRREKEGDDMVIDMINKKELINDGEKSVGKTVEKVDSTGSVKKTQKILEDGKVGVATEYGDVAQINNKGGNKKKKEKKRKREKAGGELVQNITSDGMEAGVASKHLDGHIVSENRTGSSETCIRNVKAVDVDGEKTRKKKAKAKAETLVNGEVSSRNVEVVNVEDGKKRKKAKSEKHVVEDCNRKSEAVNVGNSKKRKKSKSEKRGIAEVCNEDKKKASSSEGSLIAPKSIGAPDNSEKSTPKKASKRVSFADDVEVFSPSDGPNDEHEDLVRGKRFSEEEDKIVKEAVLRYIEEHALGDDGLNMVLRCKSHPEVKNHPELKNC…
171		Rmu_sc0004507.1_g000034.1 /pd	ATGAAGACGGGGGCGGAGAGGAGGGGGACGCGGCGGGCCTTGACGGATCTGACCATGGCGGCCTGGTCGGAGGAGGCGGCGTTGGAGTGGAGGATGACGATGCCGCCGAGGGCGGCCATGGAGACTGCCATGTGGGACTCGAACTGGAGCCAAGGGGAAGAGAAGCATTTGGGTCTCGGTTTTGATAGGTGCAACGATATTGATCCAATTAGATTGAACAAAACTAATATGGGAAGGAAGGAGAGGACACCTTTGGAGTTTGAATCAGGAAAAGAGAAGAAAAAGCACAAGGAGAAAAGGAAGGAGAAAGCAAAGAAGGATGAACTTGAAAGAAATTCTTCTGTGCTTGAAGTCTGTGGGGACAAAATGGGCAAGGAAGTTGAAGGGCTGAAATATGAC…	MKTGAERRGTRRALTDLTMAAWSEEAALEWRMTMPPRAAMETAMWDSNWSQGEEKHLGLGFDRCNDIDPIRLNKTNMGRKERTPLEFESGKEKKKHKEKRKEKAKKDELERNSSVLEVCGDKMGKEVEGLKYDKTGGNHMNSGEEANKKKKRRREKEGNDMVIDMINKKELINDGEKSVGKTVEKVDSTGSVKKTQKILEDGKVGVATEYGDVAQINNKGGNKKKKEKKGKREKAGGELVPDVTSDGMEAGVASNCLDGHIVAENMGTGSSETCIRNMEAVDVDGGKTRKKKAKANTLVNGEDSSRNVEVVNVEDCKKRKKAKSEKHVVEDCNRKSEAVNVGNSKKRKKSKSEKRGIAEICNEDKKKARSSKGRLIAQKSIGAPDNSEKSTPKKASKRV…
172		Rmu_sc0005122.1_g000012.1 /pd	ATGGTGCAAGTCAAAGAATGTGATCCTAACATGGAAAAGGGGGTTTTGCTTTCTTTGAGTCCTCCGGTATCGGATAGCAGTGGAGATAACACAGCTCTCAAGCCAGCCTCTGCTCAACTGTTCGAGAATGACAGGCCCTACGAGACGATCAACAAAGGGAGGCTGGACAGAGGAAGAGGTAAGTTCAGGATGTTGTGGCACAACCATTTAAATCCAGATATAAAAAGAACTGCATGGACAAATGAAGAAGAAAAGATTCTCATTGAGTCGCATAAAGCCTATGGGAACAAATGGGCTGAAATAGCAAAGCTTCTGCCTGGAAGGACAGAAAATTCAATAAAGAACCACTGGAACTGCTCAGTTAAGAAAAAATTAGAGCTACGCTCATTCCATATATCT…	MVQVKECDPNMEKGVLLSLSPPVSDSSGDNTALKPASAQLFENDRPYETINKGRLDRGRGKFRMLWHNHLNPDIKRTAWTNEEEKILIESHKAYGNKWAEIAKLLPGRTENSIKNHWNCSVKKKLELRSFHISNMESHKIKAGVRKTEAVKQSLDRIANFDKNVETCSINLDLVLGTPKGREIQIKSLDKGNRSWLTKGAGADNMIKSPPSNLYYDRAAAAYGLNVEQRKEIYHNYGRLRDSHYLSAKQSIKACTTPSCDLWGFPYFHGKNHKPNHPMSLLNNCSDSFDYNRGAGNFLKKPDRPITVERLHESCKVSQAYEETKDAGGATEHSEASNPGCLCYRPLQQEDLDYFLKNGEFPSTDSYIQTAFSSVSLCTPPSQDRGISVDCNDPDSTLRS…
173		Rmu_sc0005122.1_g000007.1 /pd	ATGGTGCAAGTCAAAGAATGTGATCCTAACATGGAAAAGGGGGTTTTGCTTTCTTTGAGTCCTCCGGTATCGGATAGCAGTGGAGATAACACAGCTCTCAAGCCAGCCTCTGCTCAACTGTTCGAGAATGACAGGCCCTACGAGATGATCAGCAAAGGGAGGCTGGACAGAGGAAGAGCTGAATGTGTTCGTGGCAGAACAGATGTTCAGTGCCTTCATCGCTGGCAGAAAGTCCTCTCACCTGATCTTGAAGATGATCTAATAATTGAGTTGGTCGCAAAGCAGGGGAATAAGAAATGGTCTGAAATAGCAAAGTCCTTGCCAGGCCGTATAGGCAAGCAATGTCGAGAGAGGTGGCACAACCATTTAAATCCAGATATAAAAAGAACTGCATGGACG…	MVQVKECDPNMEKGVLLSLSPPVSDSSGDNTALKPASAQLFENDRPYEMISKGRLDRGRAECVRGRTDVQCLHRWQKVLSPDLEDDLIIELVAKQGNKKWSEIAKSLPGRIGKQCRERWHNHLNPDIKRTAWTNEEEKILIESHKAYGNKWAEIAKLLPGREIQIKSLDKGNRGWLTKGVGADNMIKSPPSNLYYDRAAAACGLNIEQREEIYHNYGRLRDSHYLSAKQSIKACSTPSCDLWGFPFFHGKNHKPNHPMSLLNNGSDSFDYNRGAGNFLKKPDRPITVERLHESCTVSQDLGHLTSRSGPAHHLHHQGVLHSRFHAQIWELETRVWRRRRPLGLEESLRLWRFPTSQIIVTYSLDQDGILNVNVTAEGTSEHSDIKHMLLVKSSKRGLDS…
174	4R	Rmu_sc0004110.1_g000008.1 /pd	ATGGAGCAAGGAAGAGGATGCGAAACTCAGTGTTTGGTGAGGGTGATTGGCAGTCCGTGGCTTCTGCTTTGGGAGGAAGAACTGGTACGCAATGCTCTAATAGATGGAAAAAAGCAATTCATCCAACCAGGACAAGAAAAGGTACGTAAGTGGACTTTAGAGGAAGACACATGCCTGACCGTGGCTCATATTCTTTTCGGGGGGACTAAAAATTGGAATAAAATAGCTCAGTTGGTGTGGAGGCGAACTCAGGTACAATGTCGAGATAGGTTTGTCAACTCTTTAGAACCTTCTTTGAAGTTTGGTGAATGGACTGAAGAAGAAGACTCGATCCTGAGAGCAGCAATTGGAGAGCATGGACATTGCTGGTCAAAAGTTTCTGCCTGTGTACCTCAGCGG…	MEQGRGCETQCLVRVIGSPWLLLWEEELVRNALIDGKKQFIQPGQEKVRKWTLEEDTCLTVAHILFGGTKNWNKIAQLVWRRTQVQCRDRFVNSLEPSLKFGEWTEEEDSILRAAIGEHGHCWSKVSACVPQRTDNMCWRRWKVLFPEEVLVLREERRIRKAALICNFVDCEKERPALGPNDFLVPEDNSTKTLTFPRKTGNIKRGSQSGKTNNISSNCQVMKKIRSKRRKNYDKICSNEADICNGDDASDWDDTIA
175		Rmu_sc0015029.1_g000002.1 /pd	ATGTCTCCTCTCGCCGAGAACGACGAGCTTTCTTACTACGACGACGACGACGACGACGATGACGACGGCTTCAACGCCGACATCGAGGCCCTCCGCCGCGCCTGTATGCTCACCGGCAAAGGCCCCGACGACATCACCACCAAAAATGACGACGAAAACCCTAGCAGCAACCAAAACGACGACGTAGACCTCTCCTCGGCTCCCAATTCCGACTCCGATTTCGACGAGGACCTCGAGCTGCTCCGCAAAATCAAGAGCCAATTCTCCAACACTTCTCTCAAGCCTCTTTCGCTGAAGCCCCTCTGTACTTTGCTTCCGCCTTCTGCCTCCGACGAGGAGGAGGATGACTACCAGACGCTGCTCGCCGTTCGGAAACGTTTCGCCGCCTACGAGAACGAT…	MSPLAENDELSYYDDDDDDDDDGFNADIEALRRACMLTGKGPDDITTKNDDENPSSNQNDDVDLSSAPNSDSDFDEDLELLRKIKSQFSNTSLKPLSLKPLCTLLPPSASDEEEDDYQTLLAVRKRFAAYENDTHEKSAEQIDPSCKSVEETCNEVSGTDAHERFLTLVTDNEVGQPSTSIEWVQSDSCEPTLLPTKSSAFPKSALAFLDAINKNRSCQKFLRSKLIQIQAKIEENNKLKQRVKILRDFQAHCKRRTGEALSQKKDPRVQLILTKKPRADSKAHDRAISAMSYGPEENSHVANYRKASTKFPLSLDRKNWSEVEKKDLQNGIRQQFQEMVLQSSVDDSSYSETPDGDSNDIDKILASIKDLEITPYSIREFLPKVNWEQLASMYVPGRS…
176		Rmu_sc0025325.1_g000009.1 /pd	ATGCTTATCGTGTATGATCCTGATACTCATGAAAAAAGTGCAGAGCAGATTGATCCTTCCTGCAAATCAGTTGAGGAAACTTGCAATGAAGTATCTGGAACTGATGCTCATGAAAGGTTTCTTACTCTGGTCACCGATAATGAAGAGGGACAGCCTTCCACTTCCGTTGAGTGGGTTCAGTCAGATTCTTGTGAGCCAACTCTGTTGCCAACCAAAAGTTCAGCGTTCCCAAAGTCTGCACTGGCTTTTCTGGATGCTATTAATAAGAATAGGTCCTGTCAGAAGTTTCTTCGAAGTAAGCTAATACAAATCCAAGCGAAAATTGAGGAGAACAACAAACTGAAGCAGCGTGTCAAAATCCTTAGAGACTTTCAAGCTCATTGCAAAAGACGAACAGGA…	MLIVYDPDTHEKSAEQIDPSCKSVEETCNEVSGTDAHERFLTLVTDNEEGQPSTSVEWVQSDSCEPTLLPTKSSAFPKSALAFLDAINKNRSCQKFLRSKLIQIQAKIEENNKLKQRVKILRDFQAHCKRRTGEALSQKKDPRVQLILTKKPRADSKAHDRAISAMSYGPEENSHVANYRKASTKFPLSLDRKNWSEVEKKDLQNGIRQQFQEMVLQSSVDDSSYSETPDGDSNDIDKILASIKDLEITPYSIREFLPKVNWEQLASMYVPGRSGGECEARWLNWEDPLISHGPWTTDEDKTILYLVQKKNGVNDWNNIAEAVGTNRTPFQCLARYQRSLNASILKREWTKDEDAKLASAVEAFGEGNWQSVASALNGRTGTQCSNRWKKSLHPTRTRA…
177		Rmu_sc0001901.1_g000001.1 /partial/pd	TTGAGTGGGTTCAGTCAGATTCTTGTGAGCCAACTCTGTTGCCAACCAAAAGTTCAGCGTTCCCAAAGTCTGCACTGGCTTTTCTGGATGCTATTAATAAGAATAGGTCCTGTCAGAAGTTTCTTCGAAGTAAGCTAATACAAATCCAAGCGAAAATTGAGGAGAACAACAAACTGAAGCAGCGTGTCAAAATCCTTAGAGACTTTCAAGCTCATTGCAAAAGACGAACAGGAGAGGCGCTGTCCCAAAAGAAGGATCCTCGTGTCCAGTTAATTTTAACGAAAAAGCCAAGGGCTGATTCAAAGGCTCATGACAGAGCTATCTCAGCTATGTCTTATGGCCCAGAAGAAAATTCACATGTTGCCAACTACAGAAAGGCATCAACAAAATTTCCACTTT…	EWVQSDSCEPTLLPTKSSAFPKSALAFLDAINKNRSCQKFLRSKLIQIQAKIEENNKLKQRVKILRDFQAHCKRRTGEALSQKKDPRVQLILTKKPRADSKAHDRAISAMSYGPEENSHVANYRKASTKFPLSLDRKNWSEVEKKDLQNGIRQQFQEMVLQSSVDDSSYSETPDGDSNDIDKILASIKDLEITPYSIREFLPKVNWEQLASMYVPGRSGGECEARWLNWEDPLISHGPWTTDEDKTILYLVQKKNGVNDWNNIAEAVGTNRTPFQCLARYQRSLNASILKREWTKDEDAKLASAVEAFGEGNWQSVASALNGRTGTQCSNRWKKSLHPTRTRAGKWTPEEDKRLIVAQMLFGSKSWNKTAQFVPGRTQAQCRDRYVNSLEPSLRCGEWT…
178		Rmu_sc0003332.1_g000004.1 /pd	ATGAGCTTCAATTTGATTCCCTCTACTTCTTCGCAACCAGAGAGGAGAAGTGAAGTTCCGATAGAGGAGTGCTGCCTTGTGAATAAGCAATCCACGGCTGCGTCAAGCTCGGATTCCGAAGGAAGTGAGAGTCCTGTTCTTAAGTCACCCGGGATTGGCAGCAGCCCGGCAGAGGCTTCTCCAGTTAACAAGAGGATTACTGGTCCTATTAGGCGAGCAAAGGGTGGTTGGACTCCACAGGAGGATGAGACATTGAGGAATGCAGTTGCAAAGTTTAAGGGGAAGAACTGGAAGAAAATAGCTCAATATTTTCCTGATAGATCAGAAGTGCAATGTCTGCATCGGTGGCAGAAGGTACTAAATCCAGAACTTGTTAAAGGACCATGGACTCAAGAGGAG…	MSFNLIPSTSSQPERRSEVPIEECCLVNKQSTAASSSDSEGSESPVLKSPGIGSSPAEASPVNKRITGPIRRAKGGWTPQEDETLRNAVAKFKGKNWKKIAQYFPDRSEVQCLHRWQKVLNPELVKGPWTQEEDDKIVELQRRSEVPIEECCLVNKQSTAASSSDSEGSESPVLKSPGIGSSPAEASPVNKRITGPIRRAKGGWTPQEDETLRNAVAKFKGKNWKKIAQYFPDRSEVQCLHRWQKVLNPELVKGPWTQEEDDKIVELVAKYGPTKWSLISKSLPGRIGKQCRERWHNHLNPDIKREAWTLVEELALMHAHRMHGNKWAEIAKALPGRTDNAIKNHWNSSLKKKLDFYLATGQLPPPPKNSYPNVPKETNRSIATRRLLVGSDKGSDSTA…
179	uncertain sequences	Rmu_co8054398.1_g000001.1 /partial/fd	ATGGGAAGAGCTCCTTGCTGTGACAAGAATGGACTCAAGAAAGGTCCATGGACTTCTGAAGAAGATGTTGTTCTCGTCAACTATGTTCAGGAACATGGTCCAGGCAATTGGCGTAACCTCCCAAAGAACGCAGGACTCCAAAGATGTGGCAAGAGTTGCCGGCTTAGATGGACTAACTACCTGAGGCCTGATATAAAGAGAGGAAGATTTT	MGRAPCCDKNGLKKGPWTSEEDVVLVNYVQEHGPGNWRNLPKNAGLQRCGKSCRLRWTNYLRPDIKRGRF
180		Rmu_co8234847.1_g000001.1 /fd	ATGACAGTCCCAAACGACGCCGCTTCCAAACTCGACAGCCACCGCGCCGAGCCGGACGCGTCATCGTCACTCGCCGATGACGGCGGTGAGGTCGCCGCTGGGAAAGTGAGGGGATCGTGGTCGCCCAAAGAGGATGAGATGCTGACTCGGCTGGTCACCCAGTTTGGCGCCAGAAACTGGAGCGTCATCGCCAGAGGAATTCCCGGCCGGTCCGGCAAGTCTTGCCGGCTCCGGTGGTGCAATCAGCTTAACCCTGGTGTAAAGCGCAAACCTTTCTCCGGTAAACCGCCATTTGCTGTTGAATTTTCTGTGGATTTCGGGTTTTTTAAATGA	MTVPNDAASKLDSHRAEPDASSSLADDGGEVAAGKVRGSWSPKEDEMLTRLVTQFGARNWSVIARGIPGRSGKSCRLRWCNQLNPGVKRKPFSGKPPFAVEFSVDFGFFK
181		Rmu_sc0004237.1_g000002.1 /fd	ATGGGAAGGTCACCTTGCTGTGAGAAAGCTCACACCAACAAAGGGGCTTGGACCAAAGAAGAAGACCAACGCCTCATCGACTACATCCGCATCCATGGCGAAGGTTGCTGGCGCTCCCTCCCTAAACAAGCTGGGTTGCTTAGATGCGGCAAGAGCTGCAGGCTCAGGTGGATAAACTACCTCCGACCTGATCTCAAGCGTGGGAATTTCACCGAAGAAGAAGACGAGCTCATTATCAAGCTCCATAGCTTACTCGGAAACAAGTAA	MGRSPCCEKAHTNKGAWTKEEDQRLIDYIRIHGEGCWRSLPKQAGLLRCGKSCRLRWINYLRPDLKRGNFTEEEDELIIKLHSLLGNK
182		Rmu_sc0010132.1_g000031.1 /fd	ATGGAAAAGCAATCTCATACTGTTGCATTTCCTGGAATAAGGAGAGGTGCATGGACTCCTGAGGAGGACAAGAAGCTCCTTGCTTTCGTTCAACAACATGGCCATGGAAGCTGGCGTTCCTTCCCCCAGAAAGCTGGTCTCCAAAGATGTGGAAAGAGCTGCAGGCTAAGATGGAGAAACTATCTAAACCCTGATATTAAGAGAGGAAATTTCAGTTTGCAGGAAGACCAGACCATCATTCTACTTCATGCACTTTTGGGCAACAGGCAATTAATTGCTAAATTGAATCTTAATTAA	MEKQSHTVAFPGIRRGAWTPEEDKKLLAFVQQHGHGSWRSFPQKAGLQRCGKSCRLRWRNYLNPDIKRGNFSLQEDQTIILLHALLGNRQLIAKLNLN
183		Rmu_sc0000168.1_g000003.1 /fd	ATGGGAAGGCAATCTAATAGTACTGTTGCATCTCCTGGAATAAGGAGAGGTCCATGGACTCCTCAGGAGGACAAGAAGCTCTTTGCTTTCGTTCAACAACATGGCCATGGAAGCTGGCGTTCCTTACCCCAGAAAGCTGGTCTCCAAAGATGTGGAAAGAGCTGCAGGCTAAGATGGAGAAACTATCTAAACCCTGATATTAAGAGAGGAAATTTCAGTTTGCAGGAAGACCAGACCATCATTCTACTTCATGCACTTTTGGGCAACAGGCAATTAATTGCTAAATTGAATCTTAATTAA	MGRQSNSTVASPGIRRGPWTPQEDKKLFAFVQQHGHGSWRSLPQKAGLQRCGKSCRLRWRNYLNPDIKRGNFSLQEDQTIILLHALLGNRQLIAKLNLN
184		Rmu_sc0003819.1_g000002.1 /pd	ATGGTGAGAAAACCATGCTGTAACAAAGACAGTGTGAACAAGGGAGCGTGGTCTGCTGAGGAAGATGAACTCCTAATTCGCTACATGAGAACACATGGAATATGCAAATGGAGAGACATTCCTCAAGGAGCTGGGTTAAATCGGTGTGAGAAGAGCTGCAGACTGCGATGGCGGAATTATCTGAGGCCTGATATCGTAAGAGGAAACATTTCTGATGATGAAGAAGACCTCATTATCAGATTACACAAGCTTCTTGGAAACAGGACTATCATCCTCACCATCATGACGACTGAATGA	MVRKPCCNKDSVNKGAWSAEEDELLIRYMRTHGICKWRDIPQGAGLNRCEKSCRLRWRNYLRPDIVRGNISDDEEDLIIRLHKLLGNRTIILTIMTTE
185		Rmu_co8051018.1_g000001.1 /partial/fd	CTGCTTGTTCTTTGTCTGAGATTGGTTTTCTCACATGGGTTTGGTGACTTGCAGGAGGATGATACACTGCGAGAACAAATTAGCATTCATGGAACGGAGAACTGGGCTATTATTGCGTCTAAATTCAAGGACAAAACGACTAGACAGTGCAGGAGAAGATGGTACACATATTTGAACTCGGACTTCAAGAAGGGAGGATGGTCACCAGAGGAAGACCTGCTTTTATGTGAG	LLVLCLRLVFSHGFGDLQEDDTLREQISIHGTENWAIIASKFKDKTTRQCRRRWYTYLNSDFKKGGWSPEEDLLLCE
