# Supplementary material for: An R2R3-MYB Transcription Factor RmMYB108 Responds to Chilling Stress of Rosa multiflora and Conferred Cold Tolerance of Arabidopsis
Source: Front Plant Sci. 2021 Jul 27;12:696919. doi: 10.3389/fpls.2021.696919 (PMC8353178; doi:10.3389/fpls.2021.696919)
Supplement: Supplementary Table 4 — The names, nucleotide sequences, and encoded amino acid sequences of 119 R2R3-MYBs in Rosa multiflora. [file Table_4.XLSX]

## Sheet: Sheet1
R.multiflora_ID	Gene_name	Nucleotide sequence	Amino acid sequence
Rmu_sc0004359.1_g000048.1 /fd	RmARC1	ATGGGGAGAAGCCCTTGTTGTGCTAAGGAGGGCTTGAATAGAGGTGCATGGACTGCTCTCGAAGATAGAGATCTGACTGAATACATCAAAGTTCATGGCGAAGGAAGATGGAGAAACCTCCCCAAAAAAGCAGGACTGAAAAGGTGTGGGAAGAGCTGCAGGCTTAGGTGGTTGAACTATTTGAGACCAGACATTAAGAGAGGCAACATATCACCTGATGAAGAAGAGCTCATCGTCAAGCTTCACAAGCTCTTGGGCAACAGATGGTCTCTAATAGCGGGTAGGCTACCAGGGCGAACAGACAATGAAATAAAAAACTACTGGAACACCAATCTGAGCAAAAGAATTCAAGACCAAGAAGCTCGCTCATCGCCCTCATCAGCTGGTGGTGAAGAACCA…	MGRSPCCAKEGLNRGAWTALEDRDLTEYIKVHGEGRWRNLPKKAGLKRCGKSCRLRWLNYLRPDIKRGNISPDEEELIVKLHKLLGNRWSLIAGRLPGRTDNEIKNYWNTNLSKRIQDQEARSSPSSAGGEEPKSKKAKNVMASPFSHNVIRTKAAKCNKVFINPQLPHKGLFQMDDHRPMDHHQHVDHRPDENGLSLSPSLLETSSSSEFLVDFGMNSDLCLASLLSSKFSSGDYLFSEEMQLQEQYWSGNVGSGEDCVVDDQLQPNTVLNFQSLNYFLDADANQGDWLELAESS
Rmu_co8432707.1_g000001.1 /fd	RmAS1a	ATGAAGGAGAGGCAGCGTTGGAGACCTGAAGAGGATGCATTGTTGCGTGCATATGTGAAACAATATGGACCAAGGGAGTGGAACCTTGTATCACAGCGCATGAACACACCCCTAAACAGGGACGCCAAATCTTGCTTAGAAAGGTGGAAGAATTATCTAAAACCAGGCATCAAGAAAGGATCTCTTACTGAAGAGGAACAGCGTCTTGTCATTTGCCTTCAAGAGAAACACGGTAATAAATGGAAGAAAATCGCTGCTGAGGTCCCTGGTCGTACTGCTAAAAGATTAGGCAAGTGGTGGGAAGTGTTCAAAGAGAAGCAGCAGAGAGAACAGAAGAACAACAAGACAGTTGTTCAGCCTATTGAGGAGGGCAAGTACGATAGGATTCTTGAAACTTTT…	MKERQRWRPEEDALLRAYVKQYGPREWNLVSQRMNTPLNRDAKSCLERWKNYLKPGIKKGSLTEEEQRLVICLQEKHGNKWKKIAAEVPGRTAKRLGKWWEVFKEKQQREQKNNKTVVQPIEEGKYDRILETFAEKLVKERPAPAYLMATSKGAFLHNEVSPAPSMLPPWLSNSNVTSHVRPPSPSVTLSLSPTVAPSRASPPIPWLQPDRGPENSSFVLSNLPPPGSVPCGENFVISELVECSRELEEVHHAWAAHKKEASWRLRRVELQLESEKACRKREKMDEIEAKVKALREEQKAALDRIEAEYREQIAGLRRDAELKEQKLADQWSAKHMRLTKFLEQMGGRPRLAEPNGR
Rmu_sc0022726.1_g000008.1 /fd	RmAS1b	ATGAAGGAGAGGCAGCGTTGGAGACCTGAAGAGGATGCATTGTTGCGTGCATATGTGAAACAATATGGACCAAGGGAGTGGAACCTTGTATCACAGCGCATGAACACACCCCTAAACAGGGACGCCAAATCTTGCTTAGAAAGGTGGAAGAATTATCTAAAACCAGGCATCAAGAAAGGATCTCTTACTGAAGAGGAACAGCGTCTTGTCATTTGCCTTCAAGAGAAACACGGTAATAAATGGAAGAAAATCGCTGCTGAGGTCCCTGGTCGTACTGCTAAAAGATTAGGCAAGTGGTGGGAAGTGTTCAAAGAGAAGCAGCAGAGAGAACAGAAGAACAACAAGACAGTTGTTCAGCCTATTGAGGAGGGCAAGTACGATAGGATTCTTGAAACTTTT…	MKERQRWRPEEDALLRAYVKQYGPREWNLVSQRMNTPLNRDAKSCLERWKNYLKPGIKKGSLTEEEQRLVICLQEKHGNKWKKIAAEVPGRTAKRLGKWWEVFKEKQQREQKNNKTVVQPIEEGKYDRILETFAEKLVKERPAPAYLMATSKGAFLHNEVSPAPSMLPPWLSNSNVTSHVRPPSPSVTLSLSPTVAPSRASPPIPWLQPDRGPENSSFVLSNLPPPGSVPCGENFVISELVECSRELEEVHHAWAAHKKEASWRLRRVELQLESEKACRKREKMDEIEAKVKALREEQKAALDRIEAEYREQIAGLRRDAELKEQKLADQWSAKHMRLTKFLEQMGGRPRLAEPNGRGQGSTKPVCSWVESPASGLQRCPEPAVAGVVAAHKPATPTSF…
Rmu_ssc0000013.1_g000001.1 /pd	RmCDC5	ACAAAATTAACAAGCCATCTAAATACTGAAGATTTGACTCGAATAGTTCGGTTTCTTGATCACTGGGGAATTATCAATTACTCTGCTGCCGCACCAAGTCCTGAGCCTTGGAATGGTAATTCCTACTTAAGGGAGGAGCAAAATGGTGAGATTCATGTTCCATCAGCTGCGTTGAAGTCGATTGATAGTCTGATCAAATTTGACAAGCCCAGATGTAGGCTTAAAGCAGCTGATGTTTATAAGTCATTGTCCTGTCATGACGACGATGATGACACCTCTGATTTGGACAACAGAATTCGAAAACGTCTCTGTGAAAATCATTGCAATTATTGTTCGTGTTCTCTTCCCAGTGTATGCTATCAGTCACAGAAGGAGGTTGATGTACTGCTGTGCTCTGAC…	MKYGINEWDRISTLLNRKSAKQCNARWFQWLEPSIKKVEWTREEDEKLLHLAKLMSSQWRTIAKNVNGRTASQCIERYEKLLDAACNDNYEDPRRLRAGEIDPNPETRPARPDPVDMDEDEKEMLSEARARLANTKGKKAKRKAREAQLEEARRIASLQKRRELKAAGIDDKSTWNQQKRKRNGIDYSAEIPFEKNPPLGFYNVGDEDREVVLEQHDQFPLTIEELEGKRRVDVEAELRKQDIAKNKISNKLNIDDFSNVEDVGDEDRKVVLEQHDQFPLTIEELEGKRRVDVEAELRKQDIAKNKISNKLNVDDFSNVETVRKRSKLMLPAPQISDIELEEIAKMSNAGDLVGSENGFTDATYFGVTHATRRLGLTPSKGTVIRDELHINEGIDKDDG…
Rmu_sc0005014.1_g000023.1 /fd	RmCSA	ATGGGTCCTCAACAGCATCACCAGATGAGGAGTGACTCTAGTTATCGTCAAGATTTGAACTTTTTCCCATCACAACTGTGTCTCTCAAAAACCACCTTTGGAGTCGTGGCTAATTCGGAAATGGGTTATGGTGTTCATGACAGAAAGAGCACCATGTATCTGAATCTTGTTGGAGATGAATCTGATCATGATGACGTTATACAGACCACTGCTGCTGGCAAAACTAAGCTTTGTGTTAGAGGCCACTGGAGGCCAGCCGAAGACTCCAAACTCATAGAACTTGTGGCCCAGTTTGGTCCTCAAAACTGGAACTTGATTGCTGAGCATCTTGATGGCAGATCAGGGAAAAGTTGCAGACTGAGGTGGTTCAACCAGCTAGATCCAAGGATCAACAGAAGG…	MGPQQHHQMRSDSSYRQDLNFFPSQLCLSKTTFGVVANSEMGYGVHDRKSTMYLNLVGDESDHDDVIQTTAAGKTKLCVRGHWRPAEDSKLIELVAQFGPQNWNLIAEHLDGRSGKSCRLRWFNQLDPRINRRAFSEEEEERLLSAHRLYGNKWAMIARLFPGRTDNAVKNHWHVIMARKHREQSNVYKRRKPSSSSQPIIIPPHDHDEEDGTKNNAFSDRSTISINTSNDESGSAASASTCTNLSLTPSNRPLVPSFFKNINPFQQHKIFGSQMIAESCRIKGNENGQSTVSNSETSGDESVLTTYRTNNNNVSSMSGEDQNEKTSVMPFIDFLGVGST
Rmu_sc0003404.1_g000004.1 /fd	RmDIVa	ATGTTCCAGGAGGCGGCGCCGCCGTGTTGGCCGGCGGGGGTGAGTCATTCGACGTCGTCGTCGGCGCGGTGGACTCGACCGGAGGACAAGCTGTTCGAGCAGGCGCTGGTGAGGTTCTCTGAGGACTTGCCGGATCGGTGGGAGCGGATCGCCGAGATGGTGCCGGGGAAGAGCGCCGAGGAGGTTCTGGAGCACTATGAGACTCTGGTGCATGATGTTGTGGAGATTGACTCCGGCCGGGTCGAGTTGCCGAGTTACGCTGATGACTCGGTGGTCGGGTGGGACACGTCGAGTCAGATCTCTTTTGATGGTTGCAAGAATAGCAATAATAACGGCGGCGGCGGTGAGGCGGCCGAGAGGAAGAAGGGAAAGCCGTGGACTGAAATTGAACACAAATTG…	MFQEAAPPCWPAGVSHSTSSSARWTRPEDKLFEQALVRFSEDLPDRWERIAEMVPGKSAEEVLEHYETLVHDVVEIDSGRVELPSYADDSVVGWDTSSQISFDGCKNSNNNGGGGEAAERKKGKPWTEIEHKLFLVGLKQFGKGDWRSISRNVVVTRTPTQVASHAQKYFLRQSSGKKERKRSSIHDITSVETNSVPAPAERKWIPPPPPPPGDQGGSFAFPDFGFPK
Rmu_ssc0000215.1_g000024.1 /fd	RmDIVb	ATGGAACCGTTTTCATTCTTCCCTACTGCTCCTTCTCCACCTTTCCCTTCTTCTTCTTCCTCAGCTTTATTGGAATCTACAGCCCAGCTTGCAGAAGACGGTGATCAGTGGACTTTCGAAGAGAACAAGAGGTTTGAGACTGCACTCGCGGAGTTTGATCTTGGTGCCCCGGACCTGTTTGATAACATACAGACTAGGGTTCCTGGGAAAACTCTATGGGAAATCAAGAAACACCTTGATGATTTGTTTGAAGACATTGAGAAGATTGAGACGGGTATTATACCGATACCCGACTACAAGACTACTCCAACTCAGGTGAAATCAAATCCTAGGTCTCAGCCTAGAAAGAAAGGTGTTATATGGACTGAGGAAGAACATAAGTTGTTCCTTCAGGGCTTG…	MEPFSFFPTAPSPPFPSSSSSALLESTAQLAEDGDQWTFEENKRFETALAEFDLGAPDLFDNIQTRVPGKTLWEIKKHLDDLFEDIEKIETGIIPIPDYKTTPTQVKSNPRSQPRKKGVIWTEEEHKLFLQGLKIYGKGDWKSISRHCVMSRNPTQVASHAQKYFLRLQNSAESEQNANGECSTSNNKL
Rmu_sc0001482.1_g000009.1 /fd	RmDIVc	ATGCAAACTCTGTACCCACCTTCATATATGGCCGATACTAATTGGTTTGTCCAAGGGAGCCAGAGCTCAGATTGGACTAGAGAAGAGAACAAGCAATTTGAGAGAGCTCTGGCTATCTACGATGAGAAAACGCCGGACCGGTGGGGAATGATTGCGTTGATGATTCCGGGGAAGACGGCTGTCGATGTGTTCAAGCAGTACAAGGAGCTGGAAGATGATGTTAGTGACATAGAAGCAGGGCTGGTCGAGATTCCAGGGTACCAACAGCCGTCTTCTTTCACATTGGAGTTGGTGGATGACCGAAATTTCGATGCTAACCGAAAGAGGTCTGCAGCAACTAGAGGTTCTGATCAGGAGAGGAAGAAGGGGATTCCTTGGACAGAAGATGAGCATCTGCGG…	MQTLYPPSYMADTNWFVQGSQSSDWTREENKQFERALAIYDEKTPDRWGMIALMIPGKTAVDVFKQYKELEDDVSDIEAGLVEIPGYQQPSSFTLELVDDRNFDANRKRSAATRGSDQERKKGIPWTEDEHLRFLKGLLKYGKGDWRNISRNFVFSKTPTQVASHAQKYFMRQHSGGKDKRRPSIHDITTVNLTSTTTTSPSQNNNRPPLDQSPPPEHNNKSTESPRVVPDWNMPNDGLAGAMIFGATHGDLFESSSPFDVGSPDDLKLHWQKLYASATHYAAHARSPSSMYLMQTSRHQIHG
Rmu_sc0004721.1_g000002.1 /fd	RmDIVd	ATGAAGCTGGAAATGGAAATTCTATCCCCTTCATCCTATTTCTCAGCCTCGAATTGGCTCCTTGAGGAGACCAAGAGCTCGAAATGGACTCCAGCGGAGAACAAGATGTTCGAAAACGCCTTGGCCTTGCACGACAAGGATACGCCGGACCGGTGGCACAAGGTGGCGGCGATGATACCTGGGAAGACGGTAGGGGATGTGGTGAAGCAGTACAAGGAGTTGGAAGCTGATGTGGGAAAAATCGAGGCGGGGCTAGTCCCTATTCCGGGATATGGTACCTCCCCATTCACATTGGAATGGGTGAATAGGCATGGCTACGATGGATTCAAACAAACTTATGGGATTGGTGGCAAGAGATCTTCATCAACTAGACCTGCTGATCATGAAAGAAAGAAAGGA…	MKLEMEILSPSSYFSASNWLLEETKSSKWTPAENKMFENALALHDKDTPDRWHKVAAMIPGKTVGDVVKQYKELEADVGKIEAGLVPIPGYGTSPFTLEWVNRHGYDGFKQTYGIGGKRSSSTRPADHERKKGVPWTEDEHKLFLMGLKKYGKGDWRNISRNFVVTRTPTQVASHAQKYFIRQHSGGKDKRRASIHDITTVNLSETRTPSPDNKPPSPPDHHHSAAFPQQPNSARIPPFQWHQGGNGANMAFGQAHGNMFMSSTYGVGSYGLNKSAVHESYYAPQNMVFQMQSAQHYPHG
Rmu_sc0003267.1_g000043.1 /fd	RmDIVe	ATGTATAGGGGAATTGAAGTTCTATCTCCAGCCTCCTATCTCCAAACTTCAAATTGGTTGTTTCAAGAAAGCAAAGGTGCCGAGTGGACCGCAGAAGAGAACAAGCGATTCGAAAATGCTCTTGCTCTGTATGATAAGGACACCCCCGATCGATGGCACAAGGTGGCTTCTTGGATCCCTGGAAAGACCGTAGGCGATGTGATCAAGCAGTACAAGGAGTTGGAAGAAGATGTCAGTGATATTGAGGCTGGTCTTATCCCAATTCCTGGGTATTCTAGTAATAATTCTTTCACATTGGAGTGGGCTGACGATCAAGGCTTCGATGGATTGAAGCAATATTATAGTACTGTTGGTGGCAAGAGAGGCTCGTCGACTCGGCCGTCTGAGCAAGAAAGAAAG…	MYRGIEVLSPASYLQTSNWLFQESKGAEWTAEENKRFENALALYDKDTPDRWHKVASWIPGKTVGDVIKQYKELEEDVSDIEAGLIPIPGYSSNNSFTLEWADDQGFDGLKQYYSTVGGKRGSSTRPSEQERKKGVPWTEEEHRQFLMGLKKYGKGDWRNISRNFVTSRTPTQVASHAQKYYIRQLTGGKDKRRSSIHDITTVNLSDTKSGSQESNQSNTKSPPSQDHDSAVAVQSQQHAKVSNKQQFDWKVSKEGPQMVFNSMNGNAIIGPFFGISSHVPKIEEQDFFIGNTFHGSQFDHHNVRFEMQYQ
Rmu_sc0006463.1_g000019.1 /fd	RmDUO1a	ATGGAAGGCAAAAGGGAAGAAGGTATAAGAAAAGGACCATGGAAAGCAGAGGAGGATGAAGTGCTTCTCAACCATGTGAAGAAATGTGGCCCTAGAGACTGGAGCTCCATTCGATCCAAAGGCCTCTTGCAGCGTACTGGAAAGTCCTGCCGTCTCCGTTGGGTTAATAAGCTTCGACCCAACTTGAAGAATGGGTGCAAATTTTCACTAGAGGAGGAGAGGGTGGTAATAGAGTTGCAAGCGCAATTTGGGAACAAATGGGCAAAAATAGCAACACATTTGCCTGGAAGAACTGACAATGATGTCAAGAACTTTTGGAGTAGCAGGCAGAAGAGACTGGCTAGGATTCTGCAGACATCTACAGCAGCAATCACACCCTCCAAATCACACAAAAACAGA…	MEGKREEGIRKGPWKAEEDEVLLNHVKKCGPRDWSSIRSKGLLQRTGKSCRLRWVNKLRPNLKNGCKFSLEEERVVIELQAQFGNKWAKIATHLPGRTDNDVKNFWSSRQKRLARILQTSTAAITPSKSHKNRREISVYHDEVPTLEESEYRDNAKHFFFKEIPKFSCSSEGESSSQAASCSSPCIGNSDAIQMVPLPDLLDSKLLGFEANPVQQELALPEKNLWIESQPLIPFLENPQPQTDLEFSSDTQELLKLDFDMFTSLDAELSKQLDVEPPFLEPVGSCGNVEGEKIDNPITPDCVFDDFPADMFDQIEPLPNGSNPSDD
Rmu_sc0002640.1_g000007.1 /pd	RmDUO1b	ATGGAAGGCAAAAGGGAAGAAGGTATAAGAAAAGGACCATGGAAAGCAGAGGAGGATGAAGTGCTTCTCAACCATGTGAAGAAATGTGGCCCTAGAGACTGGAGCTCCATTCGATCCAAAGGCCTCTTGCAGCGTACTGGAAAGTCCTGCCGTCTCCGTTGGGTTAATAAGCTTCGACCCAACTTGAAGAATGGGTGCAAATTTTCACTAGAGGAGGAGAGGGTGGTAATAGAGTTGCAAGCGCAATTTGGGAACAAATGGGCAAAAATAGCAACACATTTGCCTGGAAGAACTGACAATGATGTCAAGAACTTTTGGAGTAGCAGGCAGAAGAGACTGGCTAGGATTCTGCAGACATCTACAGCAGCAATCACACCCTCCAAATCACACAAAAACAGA…	MEGKREEGIRKGPWKAEEDEVLLNHVKKCGPRDWSSIRSKGLLQRTGKSCRLRWVNKLRPNLKNGCKFSLEEERVVIELQAQFGNKWAKIATHLPGRTDNDVKNFWSSRQKRLARILQTSTAAITPSKSHKNRREISVYHDEVPTLEIPKFSCSSEGKSSSQAASCSSPCIGNSDAIQMVPLPDLLDSKLLGFEANPVQQELALPEKNLWIESQLHSPNYFQKVYNASQSPFELHTCTLAAPSDLHGHALSTTFEIYAQASAASPSVNGHTSATPGDKIMNPTNYKTMISLIPPRVRRQSNETLDATTDRVFSPFHSQQDPTRITCLRDLGDWELGGRSHARRALSDHFAVHSRCLPKKIKSPPKRTIDWGLGRLVDVT
Rmu_co8499051.1_g000001.1 /fd	RmGL1a	ATGGAAAACAAAAGACTGAAAGCTTTGCAGCCAGAGCAACCAAATAGTTGGAACAAGAAGAACTTGTGGAGGCCAGAGGAGGACTTGATTTTGAAGAAGTACGTGGAGACTCATGGTGAAGGAAACTGGGCAACTGTTTCCAAGCGATCAGGTTTGAATCGGAATGGAAAGAGCTGTAGGCTAAGATGGAAGAACTACTTGAGACCCAACATCAAACGTGGAGACATGTCCCAGGAGGAGGAAGACCTCATTATCCGAATGCATAAGCTTCTTGGCAACCGTTGGTCACTGATTGCTGGTCGGCTTCCTGGTCGAACGGATAATGAAGTGAAGAACTACTGGAATACCCATTTGAACAAGAACAACACCCCCTGCTACTGCCCCGCACCGGCACCTGGA…	MGSRSHCPRDKHGRKKVAWTAFEDQIVKDYVKNHGAGKWDKLSKETGKCLKRSGNSVRLRWLNYLRPDINTSSITEYEEDLLIRLHKLLGNRWSLIARRIPGRTENQVKNYWNSTLKKKLSQKNLCEELCNWTLEDSSSPVPTTDQDDPHWTKKNVYEEGQACQG
Rmu_sc0003317.1_g000023.1 /pd	RmGL1b	ATGGGAAGCAGGAGTCATTGTCCACGTGATAAGCATGGAAGGAAGAAGGTTGCCTGGACTGCTTTTGAAGACCAGATTGTGAAAGACTACGTCAAAAACCACGGTGCAGGCAAATGGGACAAGCTATCTAAGGAAACTGGCAAGTGTCTGAAGAGATCCGGAAACAGTGTTAGACTTAGATGGTTGAATTATCTGAGGCCTGATATCAACACAAGTAGTATTACAGAATACGAAGAAGATCTTCTCATCAGGCTCCATAAACTCTTGGGCAACAGATGGTCATTGATAGCCAGAAGGATACCAGGCAGAACTGAAAATCAAGTTAAAAACTACTGGAATTCTACCTTGAAGAAGAAGCTGTCACAAAAAAATTTATGCGAAGAGCTTTGTAATTGGACT…	MENKRLKALQPEQPNSWNKKNLWRPEEDLILKKYVETHGEGNWATVSKRSGLNRNGKSCRLRWKNYLRPNIKRGDMSQEEEDLIIRMHKLLGNRWSLIAGRLPGRTDNEVKNYWNTHLNKNNTPCYCPAPAPGGRRGRKRKTNDHDHYSDDTHHHQDNCQCSNKRSKIISSTETTKTESITREEEPKYGISSKEDDQSSSSIMSTMTATSYPYWMVDYSSNTDQSLNFDYADIDHQYSPSSSWVQYYLPTTTNNNATSSSTFVFDDEPFIAYMDSFLLLEAAFGCTSAATATSEGMQSSVMMPLSSANDPHSPHF
Rmu_ssc0000155.1_g000011.1 /fd	RmLAF1	ATGGGATGTAAGTCATCAGATAGTCCTAAGCCAAAGCCAAAGCACAGAAAGGGATTATGGTCACCTGAAGAAGACCAAAGGCTGAGAAACTACATTCTCAAACATGGCCATGGCTGCTGGAGTTCTGTCCCCATAAACGCTGGTTTGCAAAGGAATGGAAAGAGCTGCAGATTAAGGTGGATAAATTACTTAAGGCCAGGGTTAAAGAGAGGGACATTTACTAAACAAGAGGAGGAGACAATCCTAACCCTTCATCACATGTTAGGCAACAAGTGGTCTCAGATTGCACAACATTTGCCTGGAAGGACAGACAATGAGATAAAAAACTTCTGGCATTCTTATTTGAAGAAGAAAGTGGCCAAAGATAATGAAGATCAAGATCAAATGGAACTAGCTCAA…	MGCKSSDSPKPKPKHRKGLWSPEEDQRLRNYILKHGHGCWSSVPINAGLQRNGKSCRLRWINYLRPGLKRGTFTKQEEETILTLHHMLGNKWSQIAQHLPGRTDNEIKNFWHSYLKKKVAKDNEDQDQMELAQSKSQYTSTSSSDHNLDQPSPCSEKLTSTQIPSYNESPILVPQIDHQSQRPSPLPKILFAEWLSLDHVQGGSIGNNTGIDQHDYNPRADHGLGHSYSFNNEATFGSSGFHHGPATHEIMNSQFRYDPQDQIPGTGFADFISGGDLCSDFTLHDDVMYI
Rmu_sc0002021.1_g000013.1 /pd	RmMYB1	ATGAGCGGCGGTGGTGATAATAGAGTGAAGGGGTCGTGGAGTCCTCAGGAGGACTCAACGCTGATCAAGCTGGTGGCGGAGCACGGCCCGCGCAACTGGTCCTTGATCAGCTCCGGCATCCCCGGCCGGTCCGGAAAGTCGTGTAGGCTGAGGTGGTGCAACCAGCTCAGCCCCGACGTGCAGCACAAGCCGTTCTCGCCGGCCGAAGACGCCGCGATCGTCAGGGCCCACGCGCTGCACGGCAACAAGTGGGCCACCATCGCCCGGCTCCTCCCCGGCCGCACCGACAATGCCATCAAGAACCACTGGAACTCCACGCTCCGGCGGCGGAGGCTGGCCGAGTCGAGCTCGGCCTCTTCCGAGTTGAAGCGGTTGATTGGCGCCACGTCGGACGACCCG…	MSGGGDNRVKGSWSPQEDSTLIKLVAEHGPRNWSLISSGIPGRSGKSCRLRWCNQLSPDVQHKPFSPAEDAAIVRAHALHGNKWATIARLLPGRTDNAIKNHWNSTLRRRRLAESSSASSELKRLIGATSDDPETKRQCLRGASAEEDSFKAVAAGVEGVLTSLTLSPPGQKVENEVVLKSEEVGEEEEEDNDDHQEEAVDDEEKCTVEMEETCLMTMMQRMIAQEVRNYIESLRAENGLVFGLQSTVQNDRKC
Rmu_sc0013510.1_g000001.1 /fd	RmMYB101	ATGATCATGAGCAACAGCAGAGATGGATCAATGGACTTGAACGAGATGGTTACGGCCGCCCAGTTAGGAGGTGGGGCCCACCAGCTTCATCAGCCCCTGCGGGGGCTGAAGAAGGGGCCGTGGACAGCGGCCGAGGATTCAATTCTGATGGAGTACGTGAAGAAACACGGCGAGGGGAACTGGAACGCCGTGCAGAAGAACTCGGGGCTGGCCAGGTGCGGCAAGAGCTGCAGGCTCCGGTGGGCTAACCATTTGAGGCCTAATCTCAAGAAAGGCTCTCTCACTGCAGAGGAGGAGCGAATGATCATCGAACTTCATGCCAAGTACGGCAACAAATGGGCTCGCATGGCTTCTCAGTTACCCGGTAGGACTGACAACGAGATAAAGAACTACTGGAAC…	MIMSNSRDGSMDLNEMVTAAQLGGGAHQLHQPLRGLKKGPWTAAEDSILMEYVKKHGEGNWNAVQKNSGLARCGKSCRLRWANHLRPNLKKGSLTAEEERMIIELHAKYGNKWARMASQLPGRTDNEIKNYWNTRMKRRHRAGLPIYPHELQHEAAASFHHQQAHHQQQRHNSNSSSSSFSSLLSSSHPRKANYSSTPSLSLYDHISFDASLQNHHNSPSLNYSNSAMTTQFNGNGGFAIPLSPVSPVSPFGSSSSALFNQTILPTPSQYYNSGHGGFGNYSTLSLSSMIMGTPTYEPMNSELPSNQTPPYSPYTPTKPASSANFNGGEGLMEASGNTNGYEIETVTSQGKRGSGLLDDVLVQADVICGNKRSRSGDSSSAESGKDKYIVEEEDESAGQ…
Rmu_sc0014485.1_g000006.1 /pd	RmMYB101La	ATGTACAGCTTAAAGAAATTGAGATTGCTTTGGCTTGTGGTTTTTTATATTGACTTGGCGGTCATCATCATCATCATCATGGCACATAATGGTATCAATGACATCAATGGCACTGCCATGTACGGCGAGGGAAACCCCTCGGAATTGAGCTGCGTATTTATGGGGGGCAATAATATGGGCCTGAGGAAAGGTCCATGGACGGCGGTGGAGGATCGAATTCTGATGGAGTACGTGAGCAAACAGGGCGAAGGGAACTGGAATTCGGTGCAATGGAATTCCGGGCTCAAGCGTTGCGGCAAGAGTTGCAGGCTCCGGTGGGCTAATCATCTCCGCCCTAATTTGAAGAAAGGTGCATTCACACCCGAGGAAGAGAGACTCATTCTTGAACTCCACGCCAAA…	MYSLKKLRLLWLVVFYIDLAVIIIIIMAHNGINDINGTAMYGEGNPSELSCVFMGGNNMGLRKGPWTAVEDRILMEYVSKQGEGNWNSVQWNSGLKRCGKSCRLRWANHLRPNLKKGAFTPEEERLILELHAKYGNKWARMASQNLHLIQCSKLKKARLWLLELIKRDISIKKLKMPIKFTAKALGLQDVPGGGGGFLVSKQTPLQVMACSSKKKRGRPLGARNKNPSKSSKVSAEDVLSVLYSGNPPSRNPKGKEKV
Rmu_co8296705.1_g000001.1 /partial/fd	RmMYB101Lb	ATGGCACATAATGGTATCAATGACATCAATGGCACTGCCATGTACGGCGAGGGAAACCCCTCGGAATTGAGCTGCGTATTTATGGGGGGCAATAATATGGGCCTGAGGAAAGGTCCATGGACGGCGGTGGAGGATCGAATTCTGATGGAGTACGTGAGCAAACAGGGCGAAGGGAACTGGAATTCGGTGCAATGGAATTCCGGACTCAAGCGTTGCGGCAAGAGTTGCAGGCTCCGGTGGGCTAATCATCTCCGCCCTAATTTGAAGAAAGGTGCATTCACACCCGAGGAAGAGAGACTCATTCTTGAACTCCACGCCAAATACGGCAACAAATGGGCACGCATGGCCTCTCAG	MAHNGINDINGTAMYGEGNPSELSCVFMGGNNMGLRKGPWTAVEDRILMEYVSKQGEGNWNSVQWNSGLKRCGKSCRLRWANHLRPNLKKGAFTPEEERLILELHAKYGNKWARMASQ
Rmu_sc0013983.1_g000008.1 /fd	RmMYB102	ATGAGGATCATGATAAAGGGCGGCGTGTGGAAGAACACGGAGGATGAGATCCTCAAGGCCGCCGTTATGAAGTACGGCAAGAACCAGTGGGCTCGAATCTCCTCCCTCCTCGTTCGCAAATCCGCCAAGCAGTGCAAGGCTCGCTGGTACGAGTGGCTCGATCCCTCCATCAAAAAGACCGAGTGGACTAGAGAAGAGGATGAGAAACTTCTTCATCTTGCTAAGCTCATGCCTACGCAGTGGAGAACAATTGCCCCAATCGTTGGTCGTACTCCATCTCAATGCCTTGAAAGGTACGAGAAGCTCCTTGATGCAGCCTGTGTCAAGGATGAGAACTATGAACCAGGTGATGATCCCCGAAAATTGCGGCCTGGAGAGATTGACCCCAATCCTGAGTCT…	MRIMIKGGVWKNTEDEILKAAVMKYGKNQWARISSLLVRKSAKQCKARWYEWLDPSIKKTEWTREEDEKLLHLAKLMPTQWRTIAPIVGRTPSQCLERYEKLLDAACVKDENYEPGDDPRKLRPGEIDPNPESKPARPDPVDMDEDEKEMLSEARARLANTRGKKAKRKAREKQLEEARRLASLQKRRELKAAGIDNRQRKRKRKGIDYNAEIPFEKKPPPGFYDVADEDRPVDQPQFPTTIEELEGKRRVDVEAQLRKQDIAKNKIAQRQDAPSAILQANKLNDPETVRKRSKLMLPAPQISDHELEEIAKMGYANDLAGSELTEGSGATRALLANYAQTPRLGMTPSRTPQRTPAGKGDAIMMEASNLAMLRESQTPLLGGENPQLHPSDFSGVTPR…
Rmu_sc0005750.1_g000003.1 /fd	RmMYB106	ATGGGAAGGCCTCCTTGCTGTGAGAAGGTTGGCATCAAGAAAGGTCCATGGACACCTGAAGAGGATATCATTCTTGTTTCTTACATCCAAGAACATGGTCCAGGCAATTGGAGAGCAGTGCCAGCCAACACTGGGTTGTTGAGGTGCAGCAAGAGTTGCAGGCTTAGATGGACTAACTATCTCAGACCTGGAATCAAGAGAGGGAACTTCACACCTCATGAAGAAGGGATGATAATTCATTTGCAAGCTTTATTGGGTAACAAATGGGCAGCTATAGCTTCTTACCTCCCACAAAGAACAGACAATGATATAAAGAATTACTGGAACACCCACTTGAAGAAGAAGCTCAAGAAGATTCAGTCAGCTGTTGATCATCATCATCAGCAGCAACCTCAGGCT…	MGRPPCCEKVGIKKGPWTPEEDIILVSYIQEHGPGNWRAVPANTGLLRCSKSCRLRWTNYLRPGIKRGNFTPHEEGMIIHLQALLGNKWAAIASYLPQRTDNDIKNYWNTHLKKKLKKIQSAVDHHHQQQPQAQNNILGSSISDSTTSNSTHHQYPHRNNVNDITSHASTTTLSLRSINQSSSSGGIYASSTENISRLLEGWMRTSPKSTNANLVTKPSHDREENPKGGQDQDEGCDHDLLSHEAFESILSFDNLNNVNAASWDRSSTTNCDSSSIKQVSQTQCSTAAAIANEKDKHIIRACESTNTPPLSFLEKWLLDESAAGQVLEDRMMELSPISLV
Rmu_sc0000730.1_g000023.1 /fd	RmMYB108	ATGGATGTCAAACCAGGAAGGGTTTCGGACATCATTAGAAACAGTTCTGAAGAAGACGAAGATGCTATGATGATGGACCTGAGAAGAGGGCCATGGACGGTTGAGGAAGACGTTGCTCTCATGAATTACATTGCTAACCACGGCGAAGGTCGCTGGAACTCCCTTGCTCGCTGTGCAGGTTTGAAAAGAACTGGAAAGAGCTGCAGATTAAGGTGGCTCAACTATCTCCGACCCGACGTTCGACGTGGCAACATCACTCTCGAAGAACAGCTTCTCATTCTTGAGCTTCATTCTCGCTGGGGCAACCGATGGTCCAAAATTGCACAGCACTTGCCCGGAAGGACTGACAATGAAATCAAAAACTACTGGAGGACTCGCGTGCAAAAACACGCAAAGCAG…	MDVKPGRVSDIIRNSSEEDEDAMMMDLRRGPWTVEEDVALMNYIANHGEGRWNSLARCAGLKRTGKSCRLRWLNYLRPDVRRGNITLEEQLLILELHSRWGNRWSKIAQHLPGRTDNEIKNYWRTRVQKHAKQLKCDVNSKQFKDTMRYLWMPRLVERIQAAASAATAPTGASSSITAAAVNTYHFNNNNNSFQAPAGAGHVALQQATLIGNNNDLAGSYTTPENSSTAASSDSFGTQVSPVSELTDYYSNMSVNNNKPSSQALDYFQATNPHHQVGYHDSMTSPSGYSFNQGGLNSHSFQAASAPEQNNNGQWSMDGGDFSDNLWNVEESDMWFLQQQLGNI
Rmu_sc0002260.1_g000004.1 /fd	RmMYB111	ATGGGAAGAGCGCCGTGCTGTGAAAAAGTTGGGCTAAAAAGAGGAAGGTGGACAGCCGAAGAAGACGAGATCTTGACAAACTACATTCAACTCCATGGAGAAGGCTCTTGGAGATCTTTGCCCAAGAATGCAGGTTTGCTAAGGTGCGGGAAGAGTTGCAGACTGAGGTGGATAAATTATCTGAGGACTGACTTGAGGAGAGGGAACATCACACAAGAGGAGGAAGAAACCATTGTTAAGTTGCACACTGCTTTGGGTAATAGGTATGTAATAATGCATGCTCCTCACCATCTCCTATATATTTTGAGGACTGACTTGAGGAGAGGGAACATCACACAAGAGGAGGAAGAAACCATTGTTAAGTTGCACACTGCTTTGGGTAATAGGTGGTCATTGATT…	MGRAPCCEKVGLKRGRWTAEEDEILTNYIQLHGEGSWRSLPKNAGLLRCGKSCRLRWINYLRTDLRRGNITQEEEETIVKLHTALGNRYVIMHAPHHLLYILRTDLRRGNITQEEEETIVKLHTALGNRWSLIAAHLPGRTDNEIKNYWNSHLSRKIYTFTKLMKNECLIPTMINNVSKLAAAKSKRRVRTSRSAMKSKNKLNKNGTVLAPFPQVPNPAYKSDVFESLTRENPNQVQTSHSMGLECWAPKERDEKEEEEKTIRTLGGMQGSCLDITAGMISSTTPVIYAANNGEKEALDPYECVDSDVIVDHNPSGSTNVVRENGVMGFTDDHEVTIKSHQGIWSSNIEGSCGEMYAFSSPLNAAFDDHEWLDCDWFGGGGGGLQCHNDELELWGEREV…
Rmu_sc0027086.1_g000003.1 /fd	RmMYB113a	ATGGGTGGTATTCCCTGGACTAAGGAAGAGGATCAGTTGCTGAGGAAATGCATAGAGAAGTATGGAGAAGGCAAATGGCATCGAATTCCTCACTTAGCCGGTCTAAACAGGTGCCGTAAGAGCTGCAGGCTTCGGTGGCTAAACTACCTTCGGCCGAACATCAAGAGAGGGAGCTTTGAACAAGAGGAAGTTGAGCTCATCATCCAGCTCCAAAGGCTCTTGGGAAACAGGTGGTCATTAGTTGCAGCTAGGCTTCCGGGGAGGACTGGTAATGATGTGAAGAACTATTGGAATTGTCACTTGAGCAAAAAGCTAAATGCTCAAGAAACTCATGGTGATCATCAGAAGATTAATCATGCAGGGAATAATAATTTACAAGTCATAAGACCCCAAGCTTCA…	MGGIPWTKEEDQLLRKCIEKYGEGKWHRIPHLAGLNRCRKSCRLRWLNYLRPNIKRGSFEQEEVELIIQLQRLLGNRWSLVAARLPGRTGNDVKNYWNCHLSKKLNAQETHGDHQKINHAGNNNLQVIRPQASKYASSNSKRSMISSTLEDQTCQALEECSNASVAMLCNIDKDQGQISQIVEREDSNNPICSVFVLVSV
Rmu_sc0017810.1_g000002.1 /fd	RmMYB113b	ATGGGTGGTATTCCCTGGACTAAGGAAGAGGATCAGTTGCTGAGGAAATGCATAGAGAAGTATGGAGAAGGCAAGTGGCATCGAATTCCTCACTTAGCCGGTCTAAACAGGTGCCGTAAGAGCTGCAGGCTTCGGTGGCTAAACTACCTTCGGCCGAACATCAAGAGAGGGAGCTTTGAACAAGAGGAAGTTGAGCTCATCATCCAGCTCCAAAGGCTCTTGGGAAACAGGTGGTCATTAGTTGCAGCTAGGCTTCCGGGGAGGACTGGTAATGATGTGAAGAACTATTGGAATTGTCACTTGAGCAAAAAGCTAAATGCTCAAGAAACTCATGGTGATCATCAGAAGATTAATCATGCAGGGAATAATAATTTACAAGTCATAAGACCCCAAGCTTCA…	MGGIPWTKEEDQLLRKCIEKYGEGKWHRIPHLAGLNRCRKSCRLRWLNYLRPNIKRGSFEQEEVELIIQLQRLLGNRWSLVAARLPGRTGNDVKNYWNCHLSKKLNAQETHGDHQKINHAGNNNLQVIRPQASKYASSNSKRSMISSTLEDQTCQALEECSNASVAMLCNIDKDQGQISQIVEREDSNNLCVEEEHEGNNEFMGDLGMVDLDQFEQVIEQYDQEFNNKNKKWEWDDSILDMDLWVTDSS
Rmu_sc0004657.1_g000064.1 /pd	RmMYB113c	ATGGAGGACCAGTCGGGTTTGAGAAGAGGTGCGTGGACCATAGAAGAAGATAATCTTCTGAGGCAGTGTATTGCAAAGCATGGAGAAGGAAGATGGCGCCTGATTCCTCCAGCTGCAGGCTTAAACAGATGCGGGAAGAGCTGTAGGCTAAGATGGGTCAATTATCTGAAACCGGATATAAAGAGAGGAGATTTCGAGGACGATGAAGTAGATCTCCTCCATAGGCTTCACAACCTTTTAGGCAACAGGTGGTCATTGATTGCTGGAAGACTTCCGGGAAGAACAGCAAATGATGTGAAAAACTTTTGGAACACCAAGCGGCGTCGGGACAAACCACAAAGATTGGTGAAGCCCATCATACTAAGACCTAAACCACGAAGGTTAATCTCGACCAGTTCA…	MEDQSGLRRGAWTIEEDNLLRQCIAKHGEGRWRLIPPAAGLNRCGKSCRLRWVNYLKPDIKRGDFEDDEVDLLHRLHNLLGNRWSLIAGRLPGRTANDVKNFWNTKRRRDKPQRLVKPIILRPKPRRLISTSSLCLTGQGLIGDQSQLKKNISMALPTSSASPTSPIQQEIDRLRAFLEEEESIRTTTCFSLTPEGLFIEDHIQSENSISCRALPTSTALEDQLDWWMTFLDR
Rmu_sc0003147.1_g000018.1 /fd	RmMYB114a	ATGGAGGGTTTCGGCGTGAGAAAAGGTGCATGGACTAAAGAGGAAGATGAACTTCTGAGACAGGTCATCGAAAAGCATGGAGAAGGAAAATGGCATCAGGTTCCTTTCAAAGCAGGCTTAAACAGATGCAGGAAGAGCTGTAGGCTGAGGTGGCTAAATTATTTGAAGCCAAATATCAAGAGAGGAGAGTTTACAGTTGATGAAGTTGATATGATCATCAGACTTCATAAGCTTCTAGGAAACAGGTGGTCCTTAATTGCTGGAAGACTACCGGGAAGAACAGCCAACGATGTAAAGAACTATTGGAATACTTATCAACGGAAAAAGAATCAAAAGATGACTTCAGGCGCAAAAAAAATGAAAGATAAATCCCAAAAAAACACAATCGCCCCTTTGGTT…	MEGFGVRKGAWTKEEDELLRQVIEKHGEGKWHQVPFKAGLNRCRKSCRLRWLNYLKPNIKRGEFTVDEVDMIIRLHKLLGNRWSLIAGRLPGRTANDVKNYWNTYQRKKNQKMTSGAKKMKDKSQKNTIAPLVVRPRPRTFIKRLNFLERDANLEHIHSEENSSTSLPTAPPQTLELENVIDWWKVVSEDSTGSIDRTTCSSLGLEDDFFTNFWVEDMVQLSTIDGHDLVNNFYA
Rmu_sc0003147.1_g000008.1 /fd	RmMYB114b	ATGGAGGTGAGAAAAGGTTCATGGACCAAAGAGGAAGATCATCTTCTCAGGAACTACATTGAGAAACATGGACAAGGAAGATGGCACAAGGTTCCTCTCCAAGCAGGCTTAAACCGATGCAGAAAGAGCTGTAGAATGAGGTGGTTGAATTATTTGAAGCCAAACATTAAGAAAGGAGACTTTGCAGAGGATGAAGTCGATCTAATGATTAGGCTTCGGAAGCTATTGGGAAACAGGTGGTCTTTGATTGCTGGACGACTTCCTGGAAGAACATCAAACGATGTGAAAAACTATTGGAGTGCTCGAGGAAGAAGAAACATAAATTTTAGCTTCACAAAAAATTATAAGCATCCAGAAATAACAAAGACCACAATAATAAGACCTCGACCACGAACCTTC…	MEVRKGSWTKEEDHLLRNYIEKHGQGRWHKVPLQAGLNRCRKSCRMRWLNYLKPNIKKGDFAEDEVDLMIRLRKLLGNRWSLIAGRLPGRTSNDVKNYWSARGRRNINFSFTKNYKHPEITKTTIIRPRPRTFTKSLHYLSAKATTSKPINLENSSLSTSPPMQNGNEEWKTLLEEDVLTNFWNEDTVSMSSMGVNSTQQGFEMDLWHFLQEEARQ
Rmu_sc0007525.1_g000001.1 /fd	RmMYB114c	ATGGGGAAAAGCAGTACGTGCTATGATAAGAACGAGGGACCGAAGAAAGGAGGAGCCTGGGCTGCAAGTGAAGACCAGATTGTCAAAGACTACGTCAAAAAACATGGTGTGGGAAAATGGGGCAAATTATCTAGGGAAACAGGTCTGAAGAGATGTGGGAAGAGTGTGAGGCTTAGGTTGCTGAATTATCTGAGGCCTGGTATCGTTAGAGGCAACATTACAGAAGATGAAGAAGAGCTCATCATCAGACTCCACAAACTCTTGGGCAACAGATGGTCCCTGGTAGCCGGCAGGATACCAGGGCGAACTGATAATGAAATAAAGAACTACTGGAATTCCTGCTTAAAGAGGAAGCTACAACAACAAAACCACTTGGAAGTGCCTAGAAATGAGGAGATC…	MGKSSTCYDKNEGPKKGGAWAASEDQIVKDYVKKHGVGKWGKLSRETGLKRCGKSVRLRLLNYLRPGIVRGNITEDEEELIIRLHKLLGNRWSLVAGRIPGRTDNEIKNYWNSCLKRKLQQQNHLEVPRNEEIREDLSSSAAVAAAAEKNPHLTGNNVNEDEDYHQHHDVDFAVGIEFEAIDNNNGTGDDEHLRDDLWWNNFIMDLNDIQLDASEFQPDFPEIRLGNLW
Rmu_sc0003043.1_g000017.1 /fd	RmMYB114d	ATGGCCTCAGAGAAACAAGAGCCCACCGCAAGAGAATTCGTCAAGGGAAAGTGGACACCGCAAGAAGACGAGAAACTAACCGAGGCTATTGCAGTTCATGGTGCAAAGAAGTGGAACTCATTAGCGTCTAAAGCAGGGCTGAATCGGAATGGCAAGAGTTGCAGGCTGAGATGGGTGAACTATCTGAGACCCAACCTCAAGAGAGGCGACATGTCTGACCAGGAAGAGGACATGATTATTAGGCTGCACAAGCTTCTTGGAAATAGGTGGTCTTTGATTGCGGGAAGATTACCGGGTCGAACAGACAATGAGATAAAGAACTACTGGAATACCCATTTGAGCAAGAAAATTAACCAGAAAGAGAAGCAAAGTAGCAATGGATCTAATTCGACAATACAG…	MASEKQEPTAREFVKGKWTPQEDEKLTEAIAVHGAKKWNSLASKAGLNRNGKSCRLRWVNYLRPNLKRGDMSDQEEDMIIRLHKLLGNRWSLIAGRLPGRTDNEIKNYWNTHLSKKINQKEKQSSNGSNSTIQIPTVDEKPSVADDDRKVHVEMKQECLSSGVGTSAALIKKEVMIDPEDYSNTNINNIDVDDFFNLLHKEPLSWEVPQIP
	RmMYB124	ATGCAAGAAATCAAGAAGAAGCTTGGCAATGAATATTCCGACTCCAAGAAGAAGGAGCGCCATATCGTCACATGGACTCAAGAGGAAGATGATACACTGCGAGAACAAATTAGCATTCATGGAACGGAGAACTGGGCTATTATTGCGTCTAAATTCAAGGACAAAACGACTAGACAGTGCAGGAGAAGATGGTACACATATTTGAACTCGGACTTCAAGAAGGGAGGATGGTCACCGGAGGAAGACCTGCTTTTATGTGAGGCTCAGAAGATATTTGGTAACAGATGGACCGAAATAGCGAAGGTGGTTTCAGGAAGAACTGACAATGCTGTGAAAAACCGGTTTTCCACTTTGTGCAAGAAGAGAGCAAAATATGAGGCCTTAGCGAAAGAGAATGCC…	MQEIKKKLGNEYSDSKKKERHIVTWTQEEDDTLREQISIHGTENWAIIASKFKDKTTRQCRRRWYTYLNSDFKKGGWSPEEDLLLCEAQKIFGNRWTEIAKVVSGRTDNAVKNRFSTLCKKRAKYEALAKENATSYMNQNDKRVIIRNGFNTDGTSENTSPLKKMRRSHVPSLSENCNYGDRRHGQCGKTNQQLRAPFTVLIQNIHSVNNFHLSAAQTNKFQGSFLKKDDPKITALMQQAELLSSLAMKVNTDNTDQSLENAWKVLQDFLNQSKESDILSYGMSDFDFQLEDLKYLLEDLRSTSEGGRPSWRQPDLYDESPGSSEYSTGSTLLSQTECYKMEQIEAEIGTITQDIPRELQTIHIGEQNNIGELEKGIVSNGTRKQEILPSCDEATNDDA…
Rmu_co8433021.1_g000001.1 /partial/fd	RmMYB14	ATGGTGAGGAGTAGTACTCAGCAGTGTGAAGAGAAGAGACCTTTGAAGAAAGGGCCATGGAGTCCTGATGAGGATCATAAGTTGATAGCTTACATTCAAAGATATGGTATTTGGAATTGGAGTCAGATGCCTAAACCTGCCGGTCTGGCAAGGTCTGGGAAAAGTTGTAGACTTCGTTGGATGAATTACTTGAGGCCGGATATTAAGCGCGGAAACTTCAGCAAGGAAGAAGAGGAGACCATAATCAAGTTGCAACAGAATATGGGAAACAGATGGTCTGTAATTGCAGCAAAACTTCCTGGAAGAACTGACAATGAAATCAAGAATTACTGGCACACCCACTTGAAAAGGCACCTCAACAATGACAAAGCCAAAAGCGGCGAGAATACTTCATCTGAA…	MVRSSTQQCEEKRPLKKGPWSPDEDHKLIAYIQRYGIWNWSQMPKPAGLARSGKSCRLRWMNYLRPDIKRGNFSKEEEETIIKLQQNMGNRWSVIAAKLPGRTDNEIKNYWHTHLKRHLNNDKAKSGENTSSETETFLLDKEAPKASETSRENFSSSSSGIADEVYHKPQIPEQQSICETF
Rmu_sc0004898.1_g000006.1 /fd	RmMYB16a	ATGGGGAAGTCCCGAACGTTAACTAACAGCACTGCTACGACTTCGGAGATAAAAAGAGGGCCATGGACTCCTCAAGAGGACAAGAAGCTCTTTGCTTTCATTCAACAACATGGCCATGGAAGCTGGCGGTCCTTGCCCGAGAAAGCTGGTTTACAAAGATGTGGGAAGAGCTGCAGGCTAAGATGGAGAAACTACCTAAACCCTGCTATTAAGAGAGGAAATTTCAGTTTGCAGGAAGACCAGACCATCATTCAGCTTCATGCACTTCTCGGCAACAGGTGGTCAGCCATAGCTGCGAACTTACCAAGGAGAACAGACAATGAGATAAAGAACTACTGGAACACACATCTAAAGAAGAGGTTAGCCAAGACAGGGTTTGATCCTGTAACCCACAAACCC…	MGKSRTLTNSTATTSEIKRGPWTPQEDKKLFAFIQQHGHGSWRSLPEKAGLQRCGKSCRLRWRNYLNPAIKRGNFSLQEDQTIIQLHALLGNRWSAIAANLPRRTDNEIKNYWNTHLKKRLAKTGFDPVTHKPKTAILASANGDPKNLSNLSHIAQWESARLQAEARFNMGTLMMSKSLAAGGGGGDEAGGDGRATNVVQEVGSFCNFDGVLGNNGRQFEAPKLTKSAAPDFNGVSEESGTDEYGDLFEALLLQQSYTNTGFDVVDAWTLEQCNDISADYQNVIMSGGLKNPFMFQ
Rmu_sc0001120.1_g000006.1 /fd	RmMYB16b	ATGGGGAAGTCCAGAACGTTAACTAACAGCACTGCTACGACTTCAGAGATAAAAAGAGGGCCATGGACTCCTCAAGAGGACAAGAAGCTCTTTGCTTTCATTCAACAACATGGCCATGGAAGCTGGCGGTCCTTGCCCAAGAAAGCTGGTTTACAAAGATGTGGGAAGAGCTGCAGGCTAAGATGGAGAAACTACCTAAACCCTGCTATTAAGAGAGGAAATTTCAGTTTGCAGGAAGACCAGACCATCATTCAGCTTCATGCACTTCTCGGCAACAGGTGGTCAGCCATAGCTGCGAACTTACCAAGGAGAACAGACAATGAGATAAAGAACTACTGGAACACACATCTAAAGAAGAGGTTAGCCAAGACAGGGTTTGATCCTGTAACCCACAAACCC…	MGKSRTLTNSTATTSEIKRGPWTPQEDKKLFAFIQQHGHGSWRSLPKKAGLQRCGKSCRLRWRNYLNPAIKRGNFSLQEDQTIIQLHALLGNRWSAIAANLPRRTDNEIKNYWNTHLKKRLAKTGFDPVTHKPKTAILASANGDPKNLSNLSHIAQWESARLQAEARFVRQSKLIKPAPPAPQYLDFNLRTWETLMMSKSLAAGGGGGDEAGGDGRATNVVQEVGSFCNFDGVLGNNGRQFEVPKLTIPAAPDFNEVSEESGTDEYGDLFEALLLQQSYTNTGFDVVDAWTLEQCNDISADYQNVI
Rmu_sc0008155.1_g000001.1 /fd	RmMYB1L	ATGACAGTCCCAAACGACGCCGCTTCCAAACTCGACAGCCACCGCGCCGAGCCGGACGCGTCATCTTCACTCGCCGATGACGGCGGTGAGGTCGCCGCTGGGAAAGTGAGGGGATCGTGGTCGCCCAAAGAGGATGAGATGCTGACTCGGCTGGTCACCCAGTTTGGCGCCAGAAACTGGAGCGTCATCGCCAGAGGAATTCCCGGCCGGTCCGGCAAGTCTTGCCGGCTCCGGTGGTGCAATCAGCTTAACCCTGGTGTAAAGCGCAAACCTTTCTCCGATGAAGAAGATCGTATTATAGTTGCAGCTCATGCCACTCATGGGAACAGATGGGCGATAATTGCAAAGCTCCTTCCAGGTAGAACAGATAATGCAATAAAGAATCACTGGAATTCTACT…	MTVPNDAASKLDSHRAEPDASSSLADDGGEVAAGKVRGSWSPKEDEMLTRLVTQFGARNWSVIARGIPGRSGKSCRLRWCNQLNPGVKRKPFSDEEDRIIVAAHATHGNRWAIIAKLLPGRTDNAIKNHWNSTLKRGRKYIPRTRNMKEDSSLERSKASSEETVSAGNLSSVRTPEGREVLIIDNSFNQLDGRCQTEDGVAVTELKDNSTLVSELKEESTLCRPVARVSAFSAYNPSNGPSNGSIVPRPVPIHGPLVQTSNLDFDFCNSLEGDCNEPMVPLRCGHGCCDRSGGHFQSSLLGPEFIDYEEPPSFSSPEFISCATDVNNIAWIKSGLENRETMRVAENVASQRFSQGAAATPQMGYYEMNMMNGHMRFVEGQNRLMGMMTEMLSTPMPRQT…
Rmu_sc0005038.1_g000005.1 /fd	RmMYB20	ATGGGGAGGCAACCATGTTGTGATAAGGTTGGGTTGAAGAAGGGACCTTGGACAGCCGAAGAGGACAAGAAGCTCATTAACTTCATCCTCACCAATGGCCAATGCTGTTGGAGAGCTGTACCTAAGCTTGCAGGATTGTTAAGGTGTGGAAAAAGCTGCAGGCTGAGATGGACCAACTATCTCCGGCCAGACTTGAAGAGAGGTCTGTTATCTGAACATGAAGAGAAGATGGTCATTGATCTTCATGCCCAACTTGGAAACAGATGGTCTAAGATTGCTTCTCATCTCCCTGGAAGAACTGATAATGAGATCAAAAATCACTGGAATACCCACATCAAGAAGAAGCTGAAAAAAATGGGGATTGATCCTCTCACTCACAAACCACTTCCCAATGGCAAT…	MGRQPCCDKVGLKKGPWTAEEDKKLINFILTNGQCCWRAVPKLAGLLRCGKSCRLRWTNYLRPDLKRGLLSEHEEKMVIDLHAQLGNRWSKIASHLPGRTDNEIKNHWNTHIKKKLKKMGIDPLTHKPLPNGNEIENQSQQKQHIQNDQEQQQQEEEQSCTATDDTFEIDQINEGGKVEDKVEFVTMDHDDHELLNGFCIDEVPLIEPHEIHLVPNCAPSSSTSSSSSCSNSSSNFLEDLQYLPDFGWPNCDYSSSSNNNNDIIINNDTMGLWDDDFSSWGQESWAFGVL
Rmu_sc0002045.1_g000038.1 /pd	RmMYB24a	ATGTTTCTCTATGCACTTGCTTCTTCCGGATGCAAGAAATGGGCTGCCGGCTCTGGTCGAGAGGCATCCTGTGTTTTGGAGAAACTAGGGCTGGGGGGTGTTGGTGCCAACACGAATATATTCCATCAAGCCGTAATTGAGGTTAATGAAGATGGCACAACTGCGGCAGCTGCTACTGTTGCCATATGGGTTGGGGCTTCTGCTCCGCCGCCTCAAGAGATACAAGACTTTGTGGCCGATCACCCATTCATGCTATTCTCATCAGAGAAGGTGGTGGAACGCTCTCTGTGTTTCTGTCTCGCGGGGTCGTCGTCGTCGTCCTCTCGTCCCACGCCCACCAAGTATGGTGCCGAAATGAAGGAGCGGCAGCGCTGGCAACCCGAAGAAGACGCCCTCCTC…	MFLYALASSGCKKWAAGSGREASCVLEKLGLGGVGANTNIFHQAVIEVNEDGTTAAAATVAIWVGASAPPPQEIQDFVADHPFMLFSSEKVVERSLCFCLAGSSSSSSRPTPTKYGAEMKERQRWQPEEDALLRAYVKQYGPKEWALVSQRMAQPINRDPKSCLERWKNYLRPGLKKGSLSPEEQSLVIQLQAKYGNKWKKIAAELPGRTPKRLGKWWEVFREKQLKHKPGSSSAAGASQASTAASSSSTQPPEGSIPVAAGISSPEKAAQGPYDHILETFAEKYVQPKLYGMMSEPDPLLSLGSAAATPSVLPPWMNPPSATSSTSSTTPSPSVSLSLSPSDPGYDPDPTRVQMGTLVQWCKEAEEGRQSWVQHKKEATWRLSRLEQQLESEKARKRR…
Rmu_sc0010190.1_g000009.1 /pd	RmMYB24b	ATGTCTTCTAATACCAAAAGCTTCAGCAGCAGTTCCAGTGAAGATGACAATGAACTTAGGAGAGGGCCATGGACTCTTGAAGAAGACACTCTTCTGATTCAATACATAGCTCGTCACGGTGAAGGCCGATGGAATCTGCTAGCAAATCGGGCAGGATTACGGAGAACTGGGAAGAGTTGCAGATTGAGATGGTTGAACTATCTGAAACCAGATGTTAAGCGCGGAAATCTTACTCCGGAAGAACAGCTGTTGATTCTTGACCTCCACTCCAAGTGGGGAAATAGGTGGTCGAAAATTGCGCAATACTTACCCGGAAGAACAGACAATGAAATCAAGAACTACTGGAGAACTAGAGTGCAGAAACAAGCAAAGCATCTTAAGATTGATACCGACAGCACA…	MSSNTKSFSSSSSEDDNELRRGPWTLEEDTLLIQYIARHGEGRWNLLANRAGLRRTGKSCRLRWLNYLKPDVKRGNLTPEEQLLILDLHSKWGNRWSKIAQYLPGRTDNEIKNYWRTRVQKQAKHLKIDTDSTEFQNIIRCFWMPRLLQKIGDQNQLAASHQHSITAPPSQPQFTEQGAVDMSGFVYDLDIKKQNTECILPSELPMESSNTSQFSDYYPSSSFGGAIVRNDHFVNNNSHDMEVFNLGNSAAADTCYVPESESNWLEIDFSCSMWNMDELLQRVFFNLSRPVRDLRSDCGVGKLNNGVLRSDCGVGAGAALRVEVGWNRSCFRIAATTIEFDGSRRSDWQGRGSSSFCSRRRPTGSWPEVGRSWPEVGRNLSERLDSPPFRFVNMFTSRK…
Rmu_sc0002115.1_g000020.1 /fd	RmMYB27	ATGGCTTATGAAGCAGCAGCTGTGGAAGGTGAAAAACTGCGCAAAGGTCCATGGCTAGAAGAGGAAGATGAACGACTCACCATGTGTGTAAGACTTAAGGGGGATCGGAGGTGGGATGCATTAGCCAAGGAATCAGGTCTAAGGAGAAGTGGTAGGAGTTGCAGGTTGCGGTGGTTAAACTATCTCCGCCCCAATCTTAAGCATGGTCACATATCTGTCGAAGAAGAGAAAATTATCCTTCATCTTCATGAACTTTGGGGTAACAAGTGGTCAAAGATTGCAAGAGTGTTGCCAGGAAGAACTGATAATGAGATCAAGAACTACTGGAGGACACATTTAGTGAAGAAAGCACAAATTCAAGATGGAGATGCTGCATCTGCTGGAAACTTGCAATGTACA…	MAYEAAAVEGEKLRKGPWLEEEDERLTMCVRLKGDRRWDALAKESGLRRSGRSCRLRWLNYLRPNLKHGHISVEEEKIILHLHELWGNKWSKIARVLPGRTDNEIKNYWRTHLVKKAQIQDGDAASAGNLQCTSKRAQQGLFFQDGDDMSAEKKYNFDQDQDSVEKLWGAKETYSDDLCLSDFALPSSPYETWLSDWISELSSEQSGITWIPHHDSDAWDCSSSLWDMN
Rmu_sc0018739.1_g000001.1 /fd	RmMYB305	ATGGGTCACCATTCTTGCTGCAACCAACAGAAGGTGAAGAGAGGGCTTTGGTCTCCTGAGGAAGATGAGAAGCTCATCAGATACATCACCACCCATGGCTATGGTTGTTGGAGCGAAGTCCCTGAGAAAGCTGGGCTTCAAAGGTGTGGTAAGAGCTGCAGGTTGAGGTGGATTAATTATTTGAGGCCTGATATTAGAAGAGGGAGATTTACTCCAGAAGAAGAGAAATTGATTATTAGCCTTCATGGGGTTGTAGGCAACAGATGGGCTCATATAGCAAGTCACCTGCCTGGAAGAACAGACAACGAGATCAAGAACTACTGGAATTCATGGATCAAAAAGAAGATTCGAAAACCTTCCCCACCATCATCGACTTCGACAACAACCAGCACCACTGCA…	MGHHSCCNQQKVKRGLWSPEEDEKLIRYITTHGYGCWSEVPEKAGLQRCGKSCRLRWINYLRPDIRRGRFTPEEEKLIISLHGVVGNRWAHIASHLPGRTDNEIKNYWNSWIKKKIRKPSPPSSTSTTTSTTAPIAQMGYNDSTQQLDFVSQDYIASKPHAQDQTIFSSTYPMFMFDTTAIDQLAAENYNARVELFQDMVSVGFSNPDVPWNLNQHQVQALPPPPPPPAMDINYLPPLIENMDSMLPIIDDHHHQVLQPNNCSNMDMEEGDHHHHQDQMAELNEWVVSQQQYSSSCPNFLFWDEMNGVVDDHQEPGSINIVGEDHHNIIVPATSSTTGANAVLLSSFPSSL
Rmu_sc0001206.1_g000043.1 /fd	RmMYB306	ATGGGTCGGTCACCGTGCTGTGACAAAGTCGGGTTAAAGAAAGGTCCGTGGACTCCAGAAGAAGACCAGAAGCTCTTGGCTTATATCGAAGAACATGGCCATGGAAGTTGGAGAGCCCTCCCAATCAAAGCTGGGCTTCAGAGATGTGGAAAGAGCTGTAGACTGAGATGGACTAATTATCTGAGACCAGACATCAAGAGGGGAAAATTTAGTTTGCAAGAAGAGCAGACCATTATTCAACTCCATGCCCTCTTAGGCAACAGGTGGTCGGCGATAGCAACTCACTTGCCGAAGAGAACAGACAATGAGATAAAGAACTACTGGAACACACATCTCAAGAAGCGCTTAGCCAAAATGGGAATCGATCCGGTTACCCACAAGCCGAAAAACGACGCCCTG…	MGRSPCCDKVGLKKGPWTPEEDQKLLAYIEEHGHGSWRALPIKAGLQRCGKSCRLRWTNYLRPDIKRGKFSLQEEQTIIQLHALLGNRWSAIATHLPKRTDNEIKNYWNTHLKKRLAKMGIDPVTHKPKNDALLSTHDGQSKNAANLSHMAQWESARLEAEARLVRESKLRSHNSLINQLTSAAAAAAAAAASTSSSSAHQLLFMKGQSLESPTSTLTTYNSENVVPGIMPSSMIEFVGCSGASSGDHQDQTAAINAKEEGDVQVQDWKLGFGNVPSSSTHFGLHDNVTWTSNNEQVHHDRGIGSVDEVADQEGFTNLLLNNSVDRDQSMSDGGGGDSENGGSAGSDYYEDNKNYWNSILNLVNSSPSHDDSPIF
Rmu_sc0002888.1_g000037.1 /fd	RmMYB308a	ATGGGAAGAAGCAGCTCTCGTTGTGATAAGGAGGGAGCGAACAAAGGAGCCTGGACTGCTCATGAAGATCAGGTTCTGAGAGATTATGTCAAAGAGTACGGTGAAGGGAAATGGGGGAAAATGTCGAGGGAAACAGGTCTGAAGAGATGTGGAAAGAGTTGCAGGCTTAGGTGGTTGAATTATCTGAGGCCTGATATCAAGAGAGGGAACATTACAGGAGATGAAGAAGAGCTCATCATCAGGCTTCACAAACTCTTAGGCAACAGATGGTCATTGATAGCTGGAAGGCTTCCAGGGCGAACAGACAATGAGATAAAGAACTATTGGAATTCTACCATAAGGAAGAAGCAGGAAAACAGCTCAAGACGGTCTAGAAACGAGAGGAAAACCATCAAGGAC…	MGRSSSRCDKEGANKGAWTAHEDQVLRDYVKEYGEGKWGKMSRETGLKRCGKSCRLRWLNYLRPDIKRGNITGDEEELIIRLHKLLGNRWSLIAGRLPGRTDNEIKNYWNSTIRKKQENSSRRSRNERKTIKDPYLTNNEIRPTSSTRNELAEQPFLSGVERNIKAEPDSGDGFLQTTGESGMAWNFIMDLNAGQLSISEFLHTDFSKLCELNTMVADGTNGADIGHLEL
Rmu_ssc0000196.1_g000009.1 /fd	RmMYB308b	ATGGTGAGAGCTCCGTTCTATGACAAAAGTGGAGTAAAGAAAGGGGCATGGAGTGCTGAAGAAGACGATAAGTTGAGAACTTATATCCAAAGCTATGGCCATTGGAACTGGCGTCAACTACCGAAATTTGCTGGTATACAAAGGTGCGGGAAAAGTTGCAGACTAAGATGGAAGAACTACCTTCAACCAGGTGTAAAACATGGAGATTACACTGAAGAAGAAGAGGCTTTAATCATCAAACTACATGAACAACTTGGGAATAAATGGTCGATGATTGCTGCAAAATTACCAGGAAGAACTGACAATGAAATAAAAAACCATTGGCACACCCACATGAAGAAGAAGAAGAAGCGCACAAAAGAACAGCAAAATCAAACATCATCTGGTCAAGTGGTACTT…	MVRAPFYDKSGVKKGAWSAEEDDKLRTYIQSYGHWNWRQLPKFAGIQRCGKSCRLRWKNYLQPGVKHGDYTEEEEALIIKLHEQLGNKWSMIAAKLPGRTDNEIKNHWHTHMKKKKKRTKEQQNQTSSGQVVLLKDHQQSSDDHEYSSSNSDNQLGAHESATHNCNHANSLQLLHYPQILESSPVVSRESTFSSSTSSAKYFSSSSSSSSSSSPNNHEARGSTVIMNYLGDQDIVMVSSSETMILDQEYSAGDFWTKPFLQDNTCIESDTISSSSSYLLSYDEGMDLFYQVMPTPQEGS
Rmu_ssc0000073.1_g000001.1 /partial/fd	RmMYB308c	GCTTAATGGGGAGATCTCCTTGCTGTGAAAAGGCTCACACGAACAAAGGAGCTTGGACCAAAGAAGAAGATGATCGCCTCATTGCTTATATCCGAGCTCACGGCGAAGGCTGCTGGCGCTCTCTGCCTAAAGCAGCCGGCCTTCTTCGCTGCGGCAAGAGCTGTAGGCTGCGGTGGATCAACTACCTCAGACCGGACCTCAAGCGCGGAAATTTCACTGAAGAAGAAGATGAGCTCATCATCAAGCTCCATAGCCTCCTCGGGAACAAATGGTCTTTGATTGCTGGGAGACTACCGGGAAGAACAGACAATGAGATAAAGAACTACTGGAATACTCATATAAGAAGGAAGCTTTTGACAAGAGGTATTGACCCTGCAACTCACAGACCACTCAATGAAA…	LMGRSPCCEKAHTNKGAWTKEEDDRLIAYIRAHGEGCWRSLPKAAGLLRCGKSCRLRWINYLRPDLKRGNFTEEEDELIIKLHSLLGNKWSLIAGRLPGRTDNEIKNYWNTHIRRKLLTRGIDPATHRPLNETPQDSATTTTISFAASSAIIKEEDQKISTTESLKSGGRGVCFSCSLGLKDSKSCSSCGIDNIGATSAGTSNIAYDFLGLKNGVLDYRSLEMK
Rmu_sc0002320.1_g000016.1 /fd	RmMYB308d	ATGAGGAAACCTTGCTGTGAGAAGAAGACGACCAACAAAGGAGCATGGTCGAAGCAAGAAGATGAGAAGCTCACTAAATACATTCAAAAACATGGCGAAGGAAGCTGGCGCTCTCTTCCGGTCGCTGCAGGGTTGCTTCGTTGTGGAAAGAGTTGCAGACTGAGGTGGGTAAATTATCTAAGGCCAGACCTGAAACGTGGCAACTTTGGTGAAGATGAAGAGGACCTCATCATCAAGCTCCATGCACTTCTTGGGAACAGGTGGTCACTAATTGCTGGAAGATTGCCCGGCCGGACCGACAATGAAGTGAAGAATTACTGGAATACTCATCTGAGGAGAAAGCTTATGCATTTGGGAATTGACCCCAACAACCATCGCATAGGACACAATATTTGCCTC…	MRKPCCEKKTTNKGAWSKQEDEKLTKYIQKHGEGSWRSLPVAAGLLRCGKSCRLRWVNYLRPDLKRGNFGEDEEDLIIKLHALLGNRWSLIAGRLPGRTDNEVKNYWNTHLRRKLMHLGIDPNNHRIGHNICLDKVNYPCKSANSQANNDDEDDSQDPLLDSTSSGPESNTSCTLPDLNLDLTIGLPWSL
Rmu_sc0004359.1_g000049.1 /pd	RmMYB308e	ATGCACACTTGTGTCAGTCAATACGGGAAGGCTGATCTAAGTTGTTCATTGATTTCCCTCAAGATCTCAGATATTTTGAAGATGGGGAGAAAACCATGCTGTGAAAAGGAAGGGGTCATCAGAGGAGCATGGTCTACAATGGAAGATCAAATCCTCACTGACTACGTTCTAACATATGGAGAAGGGAGATGGAGAGACCTTCCTCAAAAAGCTGGGTTGAACCGGTGCGGGAAGAGTTGCAGACTAAGATGGATAAATTATCTTAGGCCTGATATCAAGAGAGGCAACATTTCTGCTGAAGAAGAAGACCTAATTATGAGACTGCATAAGCTTCTGGGAAACCGGTGGTCTCTCATTGCCGGGAGACTGCCAGGGCGGACAGACAACGAGATCAAGAAC…	MHTCVSQYGKADLSCSLISLKISDILKMGRKPCCEKEGVIRGAWSTMEDQILTDYVLTYGEGRWRDLPQKAGLNRCGKSCRLRWINYLRPDIKRGNISAEEEDLIMRLHKLLGNRWSLIAGRLPGRTDNEIKNYWNTTLCKRSPSMEQNDEEEASKLKKCTARSKQRVSAETQKKQVEVIRTKAVKCTKVFIPSHLHSYTNAVTNSASSEYSTEVPGSSAAQEQNFCGLVMDFDINDLLISDMLESSKDFLQHQVNECHEDQMGDDGAKLEDLLMAEARSENWMASTHYYPFQPNIDDEHVDLNALSSFLNAADDDDQEWMIG
Rmu_sc0004621.1_g000001.1 /fd	RmMYB30a	ATGGGAAGACCACCTTGCTGTGACAAAGTTGGAGTGAAAAAAGGGCCATGGACGCCGGAGGAAGACATCATCTTGGTGTCGTACATTCAAGAACACGGCCCTGGGAATTGGAGATCAGTTCCTACCAACACAGGTTTGATGAGATGCAGTAAGAGCTGCCGGCTTAGATGGACTAATTATCTCCGGCCGGGCATCAAACGCGGTAACTTCACCGACCATGAGGAGAAGATGATCATCCACCTCCAAGCTCTTCTAGGCAATAGATGGGCTGCCATCGCTTCCTACCTTCCTCAGAGAACAGACAATGATATAAAGAATTACTGGAACACCCACCTGAAGAAGAAACTCAGAAAGCTCCAGACAGGTACTGCTGAAGACGGTATTTCAGGTAATTCACAG…	MGRPPCCDKVGVKKGPWTPEEDIILVSYIQEHGPGNWRSVPTNTGLMRCSKSCRLRWTNYLRPGIKRGNFTDHEEKMIIHLQALLGNRWAAIASYLPQRTDNDIKNYWNTHLKKKLRKLQTGTAEDGISGNSQQPISKGQWERRLQTDIHMAKQALCEALSLDKPSHDHHHVPDLKPSLSNINGTTSTTTRPHQASTYASNTENIARLLENWMKSSPKVRTNSSDDHQTQIHHQNMLNNGSSSSTTDGAHSGTTTTPDHHEHHGFDSLFSSFNSSTLSDNASTHLSAENNHRQTSTTTNNNNTGLMMFQDESKPDLEAAAGAAAAVDQVPLTLLEKWLFDDATAHQAHDQDMLF
Rmu_sc0001865.1_g000006.1 /fd	RmMYB30b	ATGGGGAGGGCTCCGTGCTGCGAGAAAGTTGGGCTGAAGAAGGGGAGATGGACGGCAGAGGAGGATCAAACCTTAATCAACTACATCCATGCTAATGGGGAAGGCTCCTGGAGATCATTGCCCAAGAATGCAGGGTTACTGCGGTGTGGGAAGAGTTGCAGACTGAGATGGATAAACTATCTGAGAACTGACTTAAAGAGGGGAAATATTACTCCTCAAGAGGAAGATATCATCATCAAATTGCATGCTTCTCTGGGAAATAGGTGGTCTTTGATAGCTAGTCAATTACCAGGAAGAACAGACAATGAGATAAAGAACTACTGGAACTCGCACTTGAGTCGAAAAATCGACACTTTCAGGAGACCTCTTAATATGATGCATATGGCTACAGCAGCGGCA…	MGRAPCCEKVGLKKGRWTAEEDQTLINYIHANGEGSWRSLPKNAGLLRCGKSCRLRWINYLRTDLKRGNITPQEEDIIIKLHASLGNRWSLIASQLPGRTDNEIKNYWNSHLSRKIDTFRRPLNMMHMATAAAASSSSGSSTAAAGVQMNMAMKLGPPTSKRRGRGGRTSRWAMKKNKISYASTGINHHLDCTHKDDGSATVTSSSSINMCPPPPPSAAAVAAGIGQKETQNLGGGGPSDCSEGKIDGGGEVAFNDLMMDAVNETILDPAGALTLSGERQSDDGDIMGVIRDEDTGKLLCGPNKVMTTCTAAASHEEEHQLDQISATNLSSSSHSNSKSSYYGEAEAAAFDGEDWYNSCSNYSAGSAAATCNFDQQKQQYDGMNGTLDDEMRWNWESDI…
Rmu_sc0012378.1_g000001.1 /fd	RmMYB315	ATGGGAAGGCAGCCTTGTTGTGACAAAGTTGGGTTGAAAAGAGGTCCATGGACAATTGAGGAGGATCACAAGCTCATGAATTTTATCCTCAACAATGGGATCCATTGCTGGAGAGTGGTTCCGAAGCTTGCAGGATTGCTTAGATGTGGGAAAAGCTGCAGACTCAGATGGATCAATTATCTAAGGCCAGACCTCAAGAGAGGTGCTTTTACAGAAACGGAAGAGGATCAGATCATTCAACTCCATTCATGTCTTGGTAACAGGTGGTCTAAGATTGCTTCACATTTTCCGGGTAGGACGGATAATGAAATCAAGAACCACTGGAATACAAGGATCAAGAAGAGGTTAAAGCTCCTCGGAGTAGACTCTGTGAGCAACAAAGCCATTGATCCAAAAGAA…	MGRQPCCDKVGLKRGPWTIEEDHKLMNFILNNGIHCWRVVPKLAGLLRCGKSCRLRWINYLRPDLKRGAFTETEEDQIIQLHSCLGNRWSKIASHFPGRTDNEIKNHWNTRIKKRLKLLGVDSVSNKAIDPKESMEDNKEIVTDISTELGQDNGLEPKLLQDDDNGNKGFEELSNEVELSAFDETADVLENYEMFCGSLDLGTFMLNQGVSNSSTISSNNTSATTTTTNSSISVEESNYNPSISIGDRSLLQQNCLQQWVESVDSMLSWDGFNNLEQDLFFF
Rmu_sc0004219.1_g000005.1 /fd	RmMYB33	ATGAGTCGAACAACAACTGACAGTGAAGATGGACTGCTGTCTAAGGATCAAATTGAGTCACCATTAATGGATGAGAGTAATGGAGGAATTGGAAATGGCGGAATTGTTCTAAAGAAAGGGCCATGGACATCGGCTGAAGATGCAATTTTGGTGGAGTATGTTAAGAAGCATGGGGAAGGAAACTGGAATGCTGTTCAGAAGCACTCAGGACTGTTCCGCTGTGGCAAAAGCTGCCGTCTGCGATGGGCAAATCACCTAAGGCCGAATCTGAAGAAAGGGGCATTCACACCAGAAGAAGAACGTTTGATTGTTGAACTCCATGCAAAGATGGGAAACAAATGGGCGCGAATGGCGGCACATTTACCTGGCCGTACGGATAATGAGATAAAGAATTACTGG…	MSRTTTDSEDGLLSKDQIESPLMDESNGGIGNGGIVLKKGPWTSAEDAILVEYVKKHGEGNWNAVQKHSGLFRCGKSCRLRWANHLRPNLKKGAFTPEEERLIVELHAKMGNKWARMAAHLPGRTDNEIKNYWNTRIKRRQRAGLPLYPPEVCLQALQESQQGQSSGALNGTDTAHHDSLQTNSYEIPDVVFDSLKGNSCVLPYVPELPDISASGMLMKGLGSSPYCGFMPPTMHRQKRPRESTALFPTSGGSYKDGFPQFDQFENDACDKVARSYGLSFPHDPDPTTKSPLSFGVIQGSHSLSNGNSSASKPTCGAVKLELPSLQYPETDLGSWSTSPPPPLLESIDNFIQSPPPVGAFESDCASPRNSGLLDALLYEAKTLSSTKNHSTDKSSNSSS…
Rmu_sc0012989.1_g000008.1 /fd	RmMYB340	ATGGCAGCTCATATGGGTTGGGGAATAATAGAAGAAGAGGGTTGGAGAAAGGGTCCTTGGACTTCTGAGGAAGATAGATTGCTTATTGAGTATGTAAGGCTTCATGGTGAAGGAAGATGGAACTCTGTGGCTAGGCTTGCAGGACTGAAAAGAAATGGAAAGAGCTGCAGACTGAGGTGGGTGAATTATCTGAGGCCAGACCTTAAGAGGGGGCAGATAACTCCTCATGAAGAGAGCATAATTCTAGAGCTACATGCTAGGTGGGGGAACAGGTGGTCAACGATTGCAAGAAGCTTGCCTGGGAGGACTGATAATGAGATCAAGAACTACTGGAGGACCCATTTCAAGAAAAAGGCCAAAGTACCTTCTGATGCCTCTGAGAAGGCCAAAACTCGCCTC…	MAAHMGWGIIEEEGWRKGPWTSEEDRLLIEYVRLHGEGRWNSVARLAGLKRNGKSCRLRWVNYLRPDLKRGQITPHEESIILELHARWGNRWSTIARSLPGRTDNEIKNYWRTHFKKKAKVPSDASEKAKTRLLRRQQFHHQQQQQQQLQLINQADMKRIMALLDENDTKISSWPPQAAQGKQDVDTSTIAYPNHTITEEQGFFYSMLNGNVPQQVAEASSSEDSFLWDGLWNLDDVHVNFTTSSCATGKASTFHNFVVPFC
Rmu_sc0002416.1_g000020.1 /fd	RmMYB35	ATGGGCAGACCTCCTTGCTGTGACAAAGAAGGTGTCAAGAAAGGACCTTGGACTCCTGAAGAGGACATCATTTTAGTCTCTTACATTCAAGAACATGGTCCTGGAAATTGGAGGGCTGTTCCTACCAATACTGGTTTGCTTAGATGTAGCAAGAGTTGCAGGCTTAGATGGACTAACTACCTTAGGCCTGGGATCAAACGTGGGAACTTCACTGACCATGAGGAGAAGATGATCATCCATCTTCAAGCTCTTTTGGGCAATAGATGGGCTGCAATAGCCTCATACCTCCCTCAGAGAACTGACAATGATATTAAGAATTACTGGAACACCCACTTGAAGAAGAAGCTGAACAAGCTCACCCAAATTGGTGGTCACTCAAAAGATGAGGGATTCACTAGT…	MGRPPCCDKEGVKKGPWTPEEDIILVSYIQEHGPGNWRAVPTNTGLLRCSKSCRLRWTNYLRPGIKRGNFTDHEEKMIIHLQALLGNRWAAIASYLPQRTDNDIKNYWNTHLKKKLNKLTQIGGHSKDEGFTSSCSQQATIARGQWERRLQTDIHTARQALREALSPAENYKPDGFASSVSLSSTSTTTSTDLKPSMDIVPAGQSDQSPSTTLSTTYASSTENISRLLKGWMKNPPKSAKTGTTAAAGVIDSTSSNEEATLSAANTTTTTSTTGHGSIQLSNAFESLFGFECSLEASNSDLSPTMSPDQGSLFQAESKPDVDQDQMPLSLLEKWLFDEAAVIHGKEVHFSDFIALDGENANFF
Rmu_ssc0000119.1_g000038.1 /fd	RmMYB35L	ATGGGGAGACCTCCTGCTTCTTGTGACAAACTGATCAATGTGAAGAAGGGCACTTGGACTGAAGAGGAAGATGCAAATATACTCGCTCATCATGTATCCAAGAATGGGATCGGACTTAATAGATGTGGGAAGAGTTGCAAGCCTAGGTGGAGTAACTACTTGAGGGCTAATCTGAAGCATGAAACCTTCACACCCCAAGAGGAAGAATTGATTGTTAGGCTTCATGCAACCATTGGTAGCAGGTGGCCTATAATAGCTCAACAACTTCCTGGGAGGACAGACAATGATGTGAAGACCTACTGGAACACTAAGCTGAAAAAGAAGCTCTCAGATATGGGAATTGATCCCGTTACTCACAAGCCCTTCTCTCAAATTTTAGCCGACTATGGAAACATTGGT…	MGRPPASCDKLINVKKGTWTEEEDANILAHHVSKNGIGLNRCGKSCKPRWSNYLRANLKHETFTPQEEELIVRLHATIGSRWPIIAQQLPGRTDNDVKTYWNTKLKKKLSDMGIDPVTHKPFSQILADYGNIGGLPKSGMRIGIGASLNKDLKNAMLMKSSEPYTSALSNFNNSHLVPTTKIEPMQATSSTKFDNYQPYDLLTQLQAMKYVTEVSNSTTNTNPAPSPVNFYSEGSLSSSSSSTSSSAAVQEKSPLAFGWSDFLLEDAFVPTEDARGAMPHGEIWDQATMQDNMAESSSKDMFHQAQTENVGMSYGMSSNQVEATADPCDSSFVEAMVAKENDLFLEFPELLLEEPFYY
Rmu_sc0000381.1_g000013.1 /fd	RmMYB36	ATGGGTCGAGCTCCCTGCTGCGATAAGGCGAACGTGAAGAAGGGACCATGGTCACCTGAAGAGGATGCTACACTGAAGGCCTATATTGAAGAGCATGGAACTGGAGGCAACTGGATTGCCCTTCCTCAGAAAATTGGGCTCAAAAGATGTGGAAAAAGCTGCAGACTGAGATGGCTAAACTACCTGAGGCCCAACATCAAGCATGGTGGATTCTCAGAAGAAGAAGACAACATCATCTGCAACCTCTATATAAGTATTGGCAGCAGGTGGTCTATAATTGCAGCCCAATTGCCCGGAAGAACTGATAATGATATCAAGAACTACTGGAACACCCGGCTGAAGAAGAAGTTGCTTGGAAGGCGCAAGCAGTCTGGGGCTAATCGGGGAAGTCAGGACCTC…	MGRAPCCDKANVKKGPWSPEEDATLKAYIEEHGTGGNWIALPQKIGLKRCGKSCRLRWLNYLRPNIKHGGFSEEEDNIICNLYISIGSRWSIIAAQLPGRTDNDIKNYWNTRLKKKLLGRRKQSGANRGSQDLKDASDDAHQALSSSALERLQLHMQLQNLQNPFSFYNNPALWPKLHPFQEKMIQTVQSMNDQNSVNPLMMQQFSVPSHDQTVQGHKVNDHFYEQTTGALAIQEQYAKLCINPKMDELENALNGMSSSFISTSNPVDSTIVVAKADMIEQQVNSSFQAQLDGINNSVGFTSQQQDDQMVEFDCFKEMNVSKDSLMWWANDFDNKSASSNSWDSTSVLQSQGMFQDYELGYNL
Rmu_sc0016737.1_g000015.1 /fd	RmMYB39	ATGGGAAGATCAGCATGTTGTGATGAAAATGGATTAAAGAAAGGGCCGTGGACAGCAGAAGAAGATGAAAAGCTGGTGGAGTACATGGAGAGGTGCGGTGGCGATGGGAATCATCATCGCGGTGGAATTAGTTGGAGACAAGTGCCAAAGCTTGCAGGTTTGAAGAGGTGTGGAAAGAGCTGCAGGCTACGATGGACCAACTATCTGAGGTCTGATATCAAGAGGGGAAACTTCTCCCACCAAGAAGAGCAAACCATCATCAATCTCCACAAACTGCTAGGAAACAAATGGTCAGAGATAGCAAGCAACCTTCCGGGAAGGACTGATAACGAAATCAAGAACTTCTGGAACACCCATTTAAAGAAGAAACTGCTCCAAATGGGAATCGACCCCGTCACC…	MGRSACCDENGLKKGPWTAEEDEKLVEYMERCGGDGNHHRGGISWRQVPKLAGLKRCGKSCRLRWTNYLRSDIKRGNFSHQEEQTIINLHKLLGNKWSEIASNLPGRTDNEIKNFWNTHLKKKLLQMGIDPVTHTPISATHDHLSAIAASTSFSTCDWALLQYLNSKIQVLQNNILQGQGLLISNNAGPNAYDQYRSCVLGMDMEAAAVNYYNNYVLGSSPSRSCSVPDQQLLYHHGHGLGYDYDDLTSATMMNRHSSCLQGTSFGTSEYDHHDSKFAIPNMKVPFSTDDHHHKLQYGEGGHHDHQLPVLVSAATSAYVTITHDTTAANDQFATPYIPHQFSNSTHSSTTTTTTITTSSTATFEIDHEVACAGRDLIVMDDYHQEATNNDQSYWKHIME
Rmu_sc0002888.1_g000048.1 /fd	RmMYB3a	ATGGGGAGAAGCAGTACTTACTATGATAAGAATGATGGACTGAAGAAAGGAGCCTGGGCTGCAAGTGAAGACCAGATTGTCAAAGCCTACGTCAAAAAACACGGTCTGAAGAGATGTGGGAAGAGTGTGAGACTCAGGTGGTTGAACTATCTGAGGCCTGATATCATCAAAGGCAACATTACAGAAGATGAAGAAGAGCTCATCATCAGGCTCCACAAACTCCTGGGAAACAGATGGTCATTGATAGCCGGAAGGTTACCAGGGCGAACTGACAACGAAATAAAAAACTACTGGAATTCCACCTTAAAGAGGAAGCTACAAGAAGAAAATCAGTTAGAAGTGTCTAAAGATGAGGAGATCAAGGAGGGCTTGTCATCCTCTGCCGCTGATGAGGACGAC…	MGRSSTYYDKNDGLKKGAWAASEDQIVKAYVKKHGLKRCGKSVRLRWLNYLRPDIIKGNITEDEEELIIRLHKLLGNRWSLIAGRLPGRTDNEIKNYWNSTLKRKLQEENQLEVSKDEEIKEGLSSSAADEDDPHLTKDNVIEDEDHRRQHHDVDVGVGVGVGVEATNNNGTGDDEYLRDDLWWNNFIMDFNATQLDVSEFQTDFPEI
Rmu_sc0002888.1_g000051.1 /fd	RmMYB3b	ATGGTGATGAGAAGCAGTACTTACTATGATAAGAATGATGGACTGAAGAAAGGAGCCTGGGCTGCAAGTGAAGACCAGATTGTCAAAGCCTACGTCAAAAAACACGGTCTGAAGAGATGTGGGAAGGGTGTGAGACTCAGGTGGTTGAACTATCTGAGGCCTGATATTATCAAAGGCAACATTACAGAAGATGAAGAAGAGCTCATCATCAGGCTCCACAAACTCCTGGGAAACAGATGGTCATTGATAGCCGGAAGGATACCAGGGAGAACTGACAATGAAATCAAAAACTACTGGAATTCCACCTTAAAGAGGAAGCTACAACAAGAAAATCACTTAGAAGTGTCCAAAGATGAGGAGATCAAGGAGGACTTGTCATCCTCTGTCGTTGTTGCCGCT…	MVMRSSTYYDKNDGLKKGAWAASEDQIVKAYVKKHGLKRCGKGVRLRWLNYLRPDIIKGNITEDEEELIIRLHKLLGNRWSLIAGRIPGRTDNEIKNYWNSTLKRKLQQENHLEVSKDEEIKEDLSSSVVVAAATDEDAPRLTKNNVIEDEDHHRQHHDADVGGGVAAEATNNKGTGDDEYLRDDLWWNNFIMDFNDSQFDVSEFQNDIPEI
Rmu_sc0002320.1_g000018.1 /fd	RmMYB3c	ATGACTAAAGGAGCGTGGTCGATACAAGAAGACCAGAAACTCATTGACTACATCCAAAAACATGGCGAAGGTTGCTGGAATTCTCTTCCTAAGGCTGCAGGGTTGCGTCGTTGCGGTAAGAGTTGTCGACTGAGATGGATAAACTATCTACGACCAGATCTTAAACGAGGAAGCTTTGGAGAAGATGAAGAGGATCTCATCATCAGGCTTCATACACTCCTTGGGAATAGGTGGTCGCTAATAGCTGGAAGACTGCCTGGAAGGACAGATAACGAGGTGAAGAATTACTGGAACTCTCATTTAAAGAAAAAGCTACTGAACATAGGCACCACTACTCTTCGTCCAAATAAGCCCCGCGAGATTAACCATGCACCTTATAATAAGCTTGTCAAGTACTTC…	MTKGAWSIQEDQKLIDYIQKHGEGCWNSLPKAAGLRRCGKSCRLRWINYLRPDLKRGSFGEDEEDLIIRLHTLLGNRWSLIAGRLPGRTDNEVKNYWNSHLKKKLLNIGTTTLRPNKPREINHAPYNKLVKYFNDMDDEVVDEVSADSGSTGISSCLVPKLNLDLSLSLALE
Rmu_sc0006777.1_g000005.1 /fd	RmMYB41a	ATGGGAAGAACTCCGTGTTGTGACAAGAAGGGGCTGAAGAGAGGTCCATGGACACCTGATGAGGATGAGATTCTTGTCAATTACATCAACAAGAATAAGGGACATGGCAGCTGGAGAACTCTCCCACATCATGCAGGTTTAAATTTCTTTGTGTGTACTGCTACTCGTTCTATCTGGGTGTTGGTCAATGTTTGCCCTTTTCATGGTCTTCTTCGTTGTGGAAAGAGTTGCCGGCTCAGGTGGACAAATTATCTGAGACCGGACATTAAGCGCGGCCCTTTCACTGACGAAGAAGAGAAGCTTATCATTCAGCTCCATGGCATGCTTGGAAACAGGTGGGCTGCTATAGCTTCTCAGTTACCTGGACGAACTGACAATGAGATCAAGAACTTATGGAAC…	MGRTPCCDKKGLKRGPWTPDEDEILVNYINKNKGHGSWRTLPHHAGLNFFVCTATRSIWVLVNVCPFHGLLRCGKSCRLRWTNYLRPDIKRGPFTDEEEKLIIQLHGMLGNRWAAIASQLPGRTDNEIKNLWNTHLRKRLIRMGVNPQNHEPFTSDGSTSKASASIATRHMAQWESARLEAEARLSRESSNFSTPLLDKSDSDYFLRLWYSEVGQSFRKFPTAGKTPSDSPISEASSSGKCGSISAVTTEIGHCLMGSSTIAGNQDEDIEYKVFKSITGEDMVYRIYKSNTENVTRGSDSSSSNKLDDSSESAMDLLLDYPINNDMSFLEDDMNDYATSTSAKLENAFICPL
Rmu_sc0002207.1_g000004.1 /fd	RmMYB41La	ATGGTGAGAGCTCCGTGCTGCGAGAAGATGGGGTTGAAGAAAGGGCCGTGGACGCCGGAGGAGGATCACGTACTCGTCTCTTACATTCAGCAGTACGGCCATGGAAACTGGAGGGCGCTTCCCAAACTGGCAGGGTTGTTGAGGTGTGGGAAGAGTTGCAGGCTGCGGTGGACGAACTACCTGAGGCCGGATATCAAGAGAGGGAATTTTAGCAGGGAGGAAGAGGAGGCCATCATCAACTTGCATCAAATGTTGGGGAATAGATGGTCAGCAATTGCAGCAAGATTGCCTGGTCGCACAGACAATGAAATAAAAAACGTTTGGCACACCCACTTGAAAAAGAAGCTCAGCATCAAGCAGAATTCTACCACACCAGAAGCACAAGGTCAGGAATCCGAA…	MVRAPCCEKMGLKKGPWTPEEDHVLVSYIQQYGHGNWRALPKLAGLLRCGKSCRLRWTNYLRPDIKRGNFSREEEEAIINLHQMLGNRWSAIAARLPGRTDNEIKNVWHTHLKKKLSIKQNSTTPEAQGQESEPEPKPENTSCYAKSESFEYGPVSPPQCTTSSADDTSSFTTSENNTCSANMGMKVDYEMNLPQADESFWSEVLSADQNCSNETVSCDFDQAIGAAADPQVNATVEVPVDFGFSGSNMYDNCMDFWYNVFTTAGEISELLEI
Rmu_sc0005291.1_g000001.1 /fd	RmMYB41Lb	ATGGGGAGGTCTCCATGTTGCGAGAAGGTGGGTTTGAAAAAAGGACCATGGACACCTGAGGAAGACCAAAAGCTACTGTCTTACATCCAGGAACATGGCCATGGAAGCTGGCGTGCTTTGCCCGCTAAAGCAGGGCTTCAAAGATGTGGGAAGAGCTGTCGACTGAGGTGGACTAATTACCTGAGGCCTGATATCAAAAGAGGAAAGTTTAGTTTGCAGGAAGAGCAGACCATCATTCAACTCCATGCTCTTCTCGGAAACAGGTGGTCAGCTATAGCAAATCACTTGCCCAAAAGAACAGATAACGAGATCAAGAACTACTGGAACACACACCTCAAGAAAAGACTGACCAAGATGGGCATCGACCCCGCGACCCACAAGCCCAAGCACCACGAAGCC…	MGRSPCCEKVGLKKGPWTPEEDQKLLSYIQEHGHGSWRALPAKAGLQRCGKSCRLRWTNYLRPDIKRGKFSLQEEQTIIQLHALLGNRWSAIANHLPKRTDNEIKNYWNTHLKKRLTKMGIDPATHKPKHHEAYGSGSGHAKDAANLSHMAQWESARLEAEARLVRESKQLIMTNHPLQFQHHQLVNISPSTQTHGLLMSKASAATSALPCLDVLKAWQGAWSSKPIIRDNNSSNNTIVSGMNLMMAMDDLESPTSTLNFPAAYNNTAYPMQSLNANKQLPQFKQEVTNTMVLQDIHAYNGCTDASTTTTNAWFNEDVMIRTSGGNDDVNNVMLPAAAAALSNIMEGFCGGTTADMLVYNSDEQNMAAGEISDTGGDESCGRSDNNVEENRSYWDSILN…
Rmu_sc0000903.1_g000030.1 /fd	RmMYB44a	ATGGATAGCGAATCGGTTCAGCGGCAACAGAGGGAGTTGGATCGGGTTAAGGGGCCGTGGAGCCCCGAAGAGGACGACTTGCTGAGGAAGCTGGTGCAGCGGCACGGCGCTCGGAACTGGACGCTGATAAGCAAGTCGATTCCCGGCCGGTCCGGCAAGTCGTGCCGGCTTCGGTGGTGCAATCAGCTCTCGCCGGAGGTGGAGCACCGGGCGTTCACGGCGGAGGAGGACAATATTATCGCGGCGGCGCATTCCAAGTTCGGCAACAAGTGGGCCACCATAGCCAGGCTCCTCAACGGCCGTACGGACAATGCGATCAAGAACCACTGGAACTCCACTCTGAAGCGGAAGTACTCGTCCATGGCGGAAGACGGCGTCTTCGGCGGAGGCGGTTCGATC…	MDSESVQRQQRELDRVKGPWSPEEDDLLRKLVQRHGARNWTLISKSIPGRSGKSCRLRWCNQLSPEVEHRAFTAEEDNIIAAAHSKFGNKWATIARLLNGRTDNAIKNHWNSTLKRKYSSMAEDGVFGGGGSIEEHHHHHHLRPEKKSATVSVSGRGYSPTSPSGSDVSDSGVVPAVSSAQVFRPVARAVLRTESPSSQNEMIHNEPEPSTLLTLSLPGGYSTELATRREERTTSLQQQQKEAENENRTMSFGPEFMSFMQEMIRREVRNYMDDMNGQHFGIPKLS
Rmu_sc0000871.1_g000019.1 /fd	RmMYB44b	ATGGCTTCTTCTTCTTCGACCAAGAAAGCCGCGGCGGATCGGATAAAAGGTCCGTGGAGCCCAGAGGAAGACGAAGCGTTACAGAGGCTGGTCCAGAGCTACGGCCCGAGGAACTGGTCTCTGATCAGCAAATCGATCCCTGGTCGATCCGGTAAGTCGTGCCGGCTACGGTGGTGCAACCAGCTCTCGCCGGAGGTGGAGCACCGGCCGTTTACTCCTGAAGAGGACGACACCATAATTCGAGCCCATGCCCGGTTCGGAAACAAGTGGGCCACCATCTCTCGCTTGCTCAATGGCCGCACCGATAACGCCATTAAGAACCACTGGAACTCCACGCTCAAGCGCAAATTCTCGTCCTTCTCCGACGACATGTCGCCCGAGCAGCCACTCAAAAGATCG…	MASSSSTKKAAADRIKGPWSPEEDEALQRLVQSYGPRNWSLISKSIPGRSGKSCRLRWCNQLSPEVEHRPFTPEEDDTIIRAHARFGNKWATISRLLNGRTDNAIKNHWNSTLKRKFSSFSDDMSPEQPLKRSASVGAGTAVSGLYMNPGSPSGSDLSDSSLPGVIPPSQAFRPVAPVADPPTSLSLSLPGSNEGPNHQRSASGSGSSWVVSPKPKAQIVQLQPQVIQAQPEDAGGGEAARQGNHNSEAGIDKQFFSAEFLDVMQEMIRKEVRNYMSGVDHNGMFMHTEAAIRNAVVKRIGISKVE
Rmu_sc0005990.1_g000003.1 /fd	RmMYB46	ATGAGGAAGCCGGAACCCTCTGTTGTAAGTAGTACCGGGAAGAATAACAAGAACAACAGCATGAGTAACAAGCTGAGGAAGGGTTTGTGGTCGCCGGAAGAAGACGAGAAGCTGATGAGGTACATGCTCAACAATGGCCAAGGCTGCTGGAGCGACGTGGCAAGAAATGCTGGCCTCGAGAGGTGCGGCAAGAGTTGCAGGCTTCGTTGGATCAATTACTTGAGACCTGACCTTAAGAGAGGTGCCTTTTCTCCCCAAGAAGAAGACCTCATCATCCACTTCCATTCCCTTCTTGGTAACAGGTGGTCTCAAATCGCAGCACGCTTGCCAGGACGAACTGACAATGAAATCAAGAACTTCTGGAATTCGACCATAAAGAAACGTCTGAAGGTTCTGTCC…	MRKPEPSVVSSTGKNNKNNSMSNKLRKGLWSPEEDEKLMRYMLNNGQGCWSDVARNAGLERCGKSCRLRWINYLRPDLKRGAFSPQEEDLIIHFHSLLGNRWSQIAARLPGRTDNEIKNFWNSTIKKRLKVLSSSSSSTASPNASDSSSDQPNNKDFFTTAGGGGGFMNIIPQSMMPIYGDSSMQSTSLINHMFDPFPMVEHGGYYNNGNPCTAQIGSSVGSGADDCGFEENIEAFGNVNIGVEEDIFVPPLESVSTTDQDQNLKTETIFYDNNNYYSNSNNIIKGENMIGVGNYFEDDQDQGLTMGEWDLEDLMKDVSSFPFLDYQS
Rmu_ssc0000154.1_g000025.1 /fd	RmMYB46L	ATGAGAAAGCCAGAGTTGTCCGTGGGAAAAGACGTAAAAGCGAACAGTAACAGCAAGAATAAGATGATGAATAATAAGCTCAGGAAGGGATTGTGGTCGCCGGAGGAAGACGAGAAGTTGATGAGGTACATGTTGAGCAATGGACAAGGGTGTTGGAGTGACATTGCTAGAAACTCTGGTCTCCAAAGGTGTGGAAAGAGTTGTCGTCTTCGTTGGATTAACTACTTGAGACCTGATCTCAAGCGTGGTGCATTTTCGCTTCAGGAAGAACACCTTATCATCCATTTTCATTCCATTCTTGGCAACAAGTGGTCACAGATTGCTGCACGTCTTCCAGGACGAACAGACAATGAAATCAAGAATTTTTGGAACTCTGCATTGAAAAAAAGGTTGAAAAAT…	MRKPELSVGKDVKANSNSKNKMMNNKLRKGLWSPEEDEKLMRYMLSNGQGCWSDIARNSGLQRCGKSCRLRWINYLRPDLKRGAFSLQEEHLIIHFHSILGNKWSQIAARLPGRTDNEIKNFWNSALKKRLKNNNISTSTSSPNESDHSSEPNVNIGGATPFIPMHNEHDMLMSMMYMDSSSSSSSASMQVINNSTFAPNFSVLDSSSLLNYVNHTGLTQLPEAQYGDYGNYLEAGHKMGIEGDLCLPHLETSRRSLIENNNGQVVDNISNNNINHFHNDNNNNCFTNTANNMSFKVDDGDIFGQAEAGGSLRVGEEWDFEGFMQDISCFLS
Rmu_sc0004030.1_g000007.1 /fd	RmMYB4a	ATGGGAAGAGCTCCTTGCTGTGACAAGAATGGACTCAAGAAAGGTCCATGGACTTCTGAAGAAGATGTTGTTCTCGTCAACTATATTCAGGAACATGGTCCAGGCAATTGGCGTAACCTCCCAAAGAACGCAGGACTCCAAAGATGTGGCAAGAGTTGCCGGCTTAGATGGACTAACTACCTGAGGCCTGATATAAAGAGAGGAAGATTTTCCTTCGAAGAAGAAGAGACTATAATCCAACTGCACAGCATCCTCGGCAACAAGTGGTCAGCTATTGCAGCTCGCCTGCCAGGAAGAACTGACAACGAAATCAAGAACTACTGGAACACACACATCCGAAAAAGGCTTCTCCGAATGGGAATCGATCCAGTCACTCACGCTCCACGCATCGATCTTCTT…	MGRAPCCDKNGLKKGPWTSEEDVVLVNYIQEHGPGNWRNLPKNAGLQRCGKSCRLRWTNYLRPDIKRGRFSFEEEETIIQLHSILGNKWSAIAARLPGRTDNEIKNYWNTHIRKRLLRMGIDPVTHAPRIDLLDLSSILGSYVSNINPAAALLNLSNLLGTQQALNVNPELLRLVTTLSSLKQGNQQMFSQNQNQVCNISQDLQNQLVPSLQSNPQFQNLFQDDFSPDMANLKQLMQMINTEGNLPNMSNFSSPASYSQENIVPNSNFGPETVVSNLPSYVPSSTSNSTVPELAGNSFFQLPLNNSNVNHDFGFDSVLSTPHSSPTTLNSSGTYNNINSSSTEDERDLESYCSNLLKFEIPDSTLDINDYM
Rmu_sc0008339.1_g000020.1 /fd	RmMYB4b	ATGGTGAGAGCTCCTTGCTGCGAGAAAATGGGGTTGAAGAAGGGGCCATGGACTACTGAAGAAGACCAGATTCTCATCTCCTACATCCAAAATTACGGTCATGGAAATTGGCGAGCTCTGCCCAAGCATGCTGGCTTGTTGAGATGTGGGAAAAGCTGCAGACTCCGGTGGATAAACTATCTGCGGCCGGATATCAAGAGAGGAAACTTCACTAGAGAAGAAGAAGATGCCATCATCAATCTGCATGAAATGCTTGGTAACAGATGGTCAGCAATCGCAGCAAGATTACCAGGAAGAACTGATAATGAAATAAAAAATGTATGGCATACCCACTTGAAGAAGAGACTACTCAAACATAATAACACCACATCACCAACATGTAGCACTTCGAATCTCACA…	MVRAPCCEKMGLKKGPWTTEEDQILISYIQNYGHGNWRALPKHAGLLRCGKSCRLRWINYLRPDIKRGNFTREEEDAIINLHEMLGNRWSAIAARLPGRTDNEIKNVWHTHLKKRLLKHNNTTSPTCSTSNLTSRYAEPEGVNFESPTSHASMSPQPSSSDDFSSVTEASAATGQNMIKDEKIELDASFLEIDDSFWSEALSADNSGDNQLEFLEGTNDQAELQLLLPSNIDDGMDFWYDLFIKAGYGDTPELPEF
Rmu_ssc0000196.1_g000010.1 /fd	RmMYB4c	ATGGTGAGAACTCCTTGCTGTGATGAAAGGGGAATGAAGAAAGGTACATGGACTCCGGAGGAAGATAGGAAGCTCATAGCTTATGTTACTAGGTATGGCTGCTGGAATTGGCGCCAACTTCCCAAGTTTGCTGGGCTTTCAAGGTGTGGGAAGAGTTGCAGGCTGAGGTGGCTGAATTACTTGAGGCCGAACATCAAGAGAGGAAACTACACCAGTGAAGAAGAGGAAATAATAATCAGACTTCACGAAAAGCTGGGGAACAAATGGTCTGCGATTGCGGCACAGCTTCAGGGAAGAACTGACAATGAGGTTAAGAATCACTGGCACACAAACCTCAAGAAACGCTTAATGATGAACAAGCACAGGGCCTCCTCAGTTTCAATCACACACGATGATCAT…	MVRTPCCDERGMKKGTWTPEEDRKLIAYVTRYGCWNWRQLPKFAGLSRCGKSCRLRWLNYLRPNIKRGNYTSEEEEIIIRLHEKLGNKWSAIAAQLQGRTDNEVKNHWHTNLKKRLMMNKHRASSVSITHDDHHEEVVPKSSDQPKTTAPADFANAETTVDQIPQIDYLDYPELWSPQPSSSEVSSMTSDTAVAITAADGLVVEDNATSAAMGTIYGDFGDNFWTEPFLADNSYNTSGFYTPLMEPEFLYPPFDGDFLYGAT
Rmu_sc0011792.1_g000005.1 /fd	RmMYB5	ATGAGGAACCCATCTTCGACCTCATCTTCCTCCAAAGGAAAATCATCATCATCAGCAGCAGCAGCAGCTGCACCCAAAACAGCAGCAGTATCGTCTTCCTCGAGCAAGACGCCGTGCTGCGTCAAGGTGGGTCTGAAGAGAGGTCCCTGGACTCCCGAGGAAGATGAGCTCTTAGCTAATTACATCAAGAAAGAAGGCGAGGGCCGGTGGAGAACCCTCCCGAAGCGCGCCGGCCTCCTCCGCTGCGGCAAGAGCTGCCGTCTCCGCTGGATGAACTACCTCCGACCTTCCGTCAAGCGGGGCCAGATCGCCGCAGATGAAGAAGATCTCATCCTCCGCCTCCACCGCCTCCTCGGCAATAGATGGTCTCTGATAGCTGGGAGGATTCCGGGGCGTACA…	MRNPSSTSSSSKGKSSSSAAAAAAPKTAAVSSSSSKTPCCVKVGLKRGPWTPEEDELLANYIKKEGEGRWRTLPKRAGLLRCGKSCRLRWMNYLRPSVKRGQIAADEEDLILRLHRLLGNRWSLIAGRIPGRTDNEIKNYWNTHLSKKLISQGIDPRTHKPLNPDTSSADHAAVNNNGAAASSSKTNQHRGGTSSNPSPKSPITSSSPEEAAPSARENGYHVTNDDDLGAIVHGANGYGNVMTSNDSNGSAAGMGGLRSNLLIGNEEDEDMNCCTDDVFSSFLNSLINEDPFAAAAAGQHHSQPLQGMQHPNGIAPPADSSAQAFGGWESAVLMSSSFIQNDSHRVNVDQTQ
Rmu_ssc0000330.1_g000016.1 /fd	RmMYB52	ATGTGCAGCAGTACAAGAGGGCACTGGAGGCCAGCTGAAGACGAGAAGCTTAGGGAGTTGGTGGAACGATATGGACCTCATAACTGGAACGCAATTGCAGAAAAGCTCCAAGGAAGATCAGGAAAGAGCTGTAGGTTAAGATGGTTCAATCAGTTGGACCCGAGAATCAACAGAAACCCTTTTAGTGAAGAGGAAGAAGAGCGTCTTCTAGCTTCTCATCGCATCCATGGAAATAGATGGGCTGTTATTGCAAGGCTTTTTCCCGGACGCACCGACAATGCAGTCAAGAACCATTGGCATGTCATTATGGCTCGCAGATGCAGAGAGAGGTCTAGGCTTCACCATCAACTTCACGCAAAAGGGATGACTAGGACTTCTACTAACAATAGTACTCCTCAC…	MCSSTRGHWRPAEDEKLRELVERYGPHNWNAIAEKLQGRSGKSCRLRWFNQLDPRINRNPFSEEEEERLLASHRIHGNRWAVIARLFPGRTDNAVKNHWHVIMARRCRERSRLHHQLHAKGMTRTSTNNSTPHHQVLMSSINHDELSKSSSNYKQDLQMILNCRQETMNDNSYIGNYCSATERNFHYYPAAFTHNTTLAPLIPNKDQFYPNTMHQDKNREPIEFYDFLQVNTESNRSEVIDINSRKDEEEVDQLEAIRHEQTKAAGAPFIDFFSGGSVTS
Rmu_sc0007188.1_g000001.1 /fd	RmMYB53	ATGGGTAGATCTCCTTGTTGTGATGATCAGAGTGGTTTGAAGAAAGGTCCATGGACAACCGAAGAAGATCAGAAGTTGGTTGATTACATTAACACAAATGGCCATGGAAGCTGGAGAGCTCTCCCCAAGCTTGCAGGCCTCAACAGGTGTGGCAAGAGTTGCAGGTTAAGGTGGACTAATTACCTGAGGCCTGATATCAAGAGAGGTAAATTCTCCGAAGAAGAGGAAAGAGTTATCATCAACCTTCATGCAGTTGTTGGGAACAAGTGGTCTAAGATTGCTACTCATCTTCCGGGGCGAACTGATAATGAAATCAAGAACTTTTGGAACACTCACCTGAGAAAGAAGCTGCTACAAATGGGACTTGATCCAAACACCCACAAGCCAAGGACAGACCTC…	MGRSPCCDDQSGLKKGPWTTEEDQKLVDYINTNGHGSWRALPKLAGLNRCGKSCRLRWTNYLRPDIKRGKFSEEEERVIINLHAVVGNKWSKIATHLPGRTDNEIKNFWNTHLRKKLLQMGLDPNTHKPRTDLNHLLNLSQLLSTANIGNMMTSTPWDNALRLQASAAQLAKMQLLQNLYMQVINSSVAPDIDNKTSTGLFGSQNINLFGGYFSGASTMVGGQEWNPDSIPGAPNELNTISNSLEGFEGLNSNINTNLMSSCYDIQSFKNQFAELVSASSPGSSTTNNQIESTSTGDIPAAGQSSPTSIFEAWEKLMDDDTSESYWKDILQSMS
Rmu_sc0002549.1_g000025.1 /fd	RmMYB54a	ATGATGGCCAATCACAATGCTAGTGCTATAAATGCAACAGAAAATCCAAATGCCTTGAGTTGTTTCCCATCCTCATCTTCCTGTTCTTCTTCTTCTTCACCTGGTTTTTCAATGGGGATGGTTTATGCAGATATGGGCTCCCTTTCCCTCAGTGTCTCCAACTATGATCTAGTTTCTTCTCACGAGAGCAGTTATTACAATACCTCAAACTCAAACCTCTCTCATAATCATGAAGTGGAAAATGGTAATACACCATATTTCTGGGGGTTTCCGCCGTCTTTGGGAACCAGAAGCGCCGAGGAACACCACGGCCACCACAACAACAGTGACTTTCGCGGAGGCGGTAAGGCCTGTTCAGATAGCATGAGTGATGATGGGACTGAGGAACATAATGAGTCT…	MMANHNASAINATENPNALSCFPSSSSCSSSSSPGFSMGMVYADMGSLSLSVSNYDLVSSHESSYYNTSNSNLSHNHEVENGNTPYFWGFPPSLGTRSAEEHHGHHNNSDFRGGGKACSDSMSDDGTEEHNESMNHKNGQSKLCARGHWRPAEDSKLKELVALYGPQNWNLIAEKLEGRSGKSCRLRWFNQLDPRINRRAFSEEEEERLMQAHRIYGNKWAMIARLFPGRTDNAVKNHWHVIMARKYREQSSAYRRRKLSQSVCRASSMEENMNSAPPAVPYSYLNNYGSSGNSHNMASWEEAAIITNEKVPPPFQFLPGTNDEAGQISSGNFYDHPPYMMNVMAMRQSNYYHTLQSFSDSTSASPSLVSAGGKLSSTTSAGDQERRDIAPSFIDFLGV…
Rmu_sc0011050.1_g000002.1 /fd	RmMYB54b	ATGGGTCCTCACCAACATCACCAGATGAGGAGTGACTCTAGTTATCGTCCAGATTTGAATTTTTTTCCATCACAACTGTGTCTCTCAAAAACTACCTTTGGAGTCGTGGCTAATTCGGAAATGGGTTATGGTGTTCATGACAGAAAGAACACCATGTATCTGAATCTTGTTGGAGATGAATCTGATCATGATGACGTTATACAGACCACCGCTGCTGGCGAAACTAAGCTTTGTGTTAGAGGCCATTGGAGGCCAGCTGAAGACTCTAAACTCAAAGAACTTGTGGCCCAGTTTGGTCCTCAAAACTGGAACTTGATTGCTGAGCATCTTGATGGCAGATCAGGGAAAAGTTGCAGACTGAGGTGGTTTAACCAGCTAGATCCAAGGATCAACAGAAGG…	MGPHQHHQMRSDSSYRPDLNFFPSQLCLSKTTFGVVANSEMGYGVHDRKNTMYLNLVGDESDHDDVIQTTAAGETKLCVRGHWRPAEDSKLKELVAQFGPQNWNLIAEHLDGRSGKSCRLRWFNQLDPRINRRAFSEDEEERLLSAHRLYGNKWAMIARLFPGRTDNAVKNHWHVIMARMHREQSNVYKRRKPSSNSQAVIIPQHDHDHGQEDGAKNNASSDRSTISINTSNDESGSAASASTCTNLSLTPSNSPLLPSFFKNINPFQQHKIFGSQMGAGRIKGNENGQLSDSNSETSGDESVLTTYRTNSNNVSSMSREAQSDKISVMPFIDFLGVGST
Rmu_sc0001634.1_g000020.1 /fd	RmMYB61a	ATGGGGAGGCATTCTTGTTGCTACAAGCAGAAGCTTAGGAAAGGCCTCTGGTCTCCTGAAGAAGATGAGAAGCTTCTCAATTACATCACTAAGCATGGCCATGGCTGTTGGAGCTCAGTCCCCAAGCTTGCAGGCCTACAAAGATGTGGGAAGAGCTGCAGGTTGAGGTGGATAAACTACCTGAGGCCTGATTTGAAGAGAGGTCCATTCTCACAGCAAGAAGAGAATTTGATAATTGAGCTTCACGCAGTTCTGGGCAACAGGTGGTCTCAGATTGCGGCTCAATTACCCGGAAGGACCGACAATGAGATCAAGAATCTATGGAATTCCTGCATTAAGAAGAAGCTGCGGCAAAGAGGCATTGACCCCAACACTCACAAACCAATCTCAGCAGAAACT…	MGRHSCCYKQKLRKGLWSPEEDEKLLNYITKHGHGCWSSVPKLAGLQRCGKSCRLRWINYLRPDLKRGPFSQQEENLIIELHAVLGNRWSQIAAQLPGRTDNEIKNLWNSCIKKKLRQRGIDPNTHKPISAETEQNDHSKEISQLSPTNYKSNEQQKASVGSNELNLVEAVANSKQPENHRYPVEVSSSSQVISNRNSTQEFFIDRAACSSHEGSTTTNCRPSDFVGYFSFQHHHQSNFGSSSDTMGLNAVNPNPTFSFLNQNSRSNSDPQMVSEFSTSMSTPPTLLPSMSSGSLFGTRVKPSISLPSDNSSTVSWDQSSAGYSNNGGFDSTAAAFSWGLMPEVPVKSDDVEEINKWSEYLHSPFLMGANTMQNINQSSPYNSTEIKPETQYFMTNNGS…
Rmu_sc0003383.1_g000026.1 /fd	RmMYB62a	ATGGCTGGTGTTGCAAACATTGTGTGCACAAGTCCTAATGAAGAAGAGAATGAGCTGAGAAAAGGGCCATGGACACTTGCCGAAGACACCCTGCTCACAAATTACATTGCCAACCACGGCGAAGGCCATTGGAATGCCTTAGCGAAATGTGCAGGATTGAAGAGGAAAGGAAAAAGCTGCAGATTGAGGTGGCTTAATTATCTGAAACCCGACACCAAGCGTGGGAACCTTACTTCACAAGAACAACTCTTGATCCTTGAACTCCATTCCAAGTGGGGTAACAGGTGGACAAAAATAGCGCAACATTTGCCAGGAAGAACAGACGATGAGATTAAGACCCACTGGAGAACAAGGGTGCACAAACAGGTGCGCCAACTTAATATTGAGTCTAATAGCGAG…	MGHRCCGKHKVKRGLWSPEEDDKLIKHVTTHGHGSWSSVPKHAGLERCGKSCRLRWINYLRPELKRGSFTSEEEQIIIDVHRILGNRWAQIAKHLPGRTDNEVKNFWNSCIKKKLMSQGLDPQTHNLISSHKRSLASNKIAGSNAKLQSHINQKRPVFTVNNMSQIIDSSTEINYSISPPIVPLSNAQPPTVQPIMATPTDNQYLVHNPNSRWTSVTDIPTFPDSTQSITSASSSSAFGHLDGSNCIWAAGADPFEAAPGAMELQGEQSNGQVVQVEQEKEKLLEMEMKAMQDMDIAASFDQNSSFDFSLVEYCSTLMSGVVPHDHVNYSAADFTWNF
Rmu_sc0002328.1_g000003.1 /fd	RmMYB62b	ATGGCTGGTGTTGCAAACAGTGTGTACACAAGTCCTAATGAAGAAGAGAATGAGATGAGAAAGGGGCCATGGACGCTTGACGAAGACACCCTGCTCATACATTACATTGCCAACCACGGCGAAGGACATTGGAATGCCTTAGCAAAATGTGCAGGATTGAAGAGGACAGGAAAAAGCTGCAGATTAAGATGGTTGAATTATTTGAAACCTGACATCAAGCGTGGGAACCTTACTCCACAAGAACAACTCTTGATCCTTGAACTCCATGCCAAGTGGGGTAACAGGTGGTCGAAAATAGCACAACATTTGCCAGGAAGAACAGACAATGAGATTAAGAACTATTGGAGAACAAGGGTGCAAAAACAAGCGCGCCAACTTAATATTGAGTCTGATAGCAAG…	MAGVANIVCTSPNEEENELRKGPWTLAEDTLLTNYIANHGEGHWNALAKCAGLKRKGKSCRLRWLNYLKPDTKRGNLTSQEQLLILELHSKWGNRWTKIAQHLPGRTDDEIKTHWRTRVHKQVRQLNIESNSERLLDAVRCFWMPTLHQKMEQPSSLSLDPSSSLSNSQIAVAPSLSPQTYSVSSSPPSKVVSHVSDYSPIGNSSPSHSSLSSDSLISQLPQIQEQPASSSHAFEALNDNYYVDYDMEGFRFDPVSEMASFDTSQFDCQTAESNWIEDNYMTDTLWSMQGM
Rmu_sc0007200.1_g000002.1 /fd	RmMYB63	ATGGGGGGGAAGGGAAGAACACCATGTTGTGATAAGAGCCAAGTGAAGAGAGGTCCCTGGAGTCCTTCTGAGGACTTGAGGCTTATCAGCTTCATTCAGAAACACGGCCATGGTAACTGGAGGGCTCTCCCTAAACAAGCAGGTCTACTGCGATGTGGGAAAAGTTGTCGTTTGAGATGGATTAACTACCTTCGGCCTGATCTGAAGCGAGGTAACTTCACAAAAGAGGAAGAGGAGTCCATAATTAAGCTACATGAAACTTGGGGAAACAAGTGGTCCAAAATTGCATCCCATTTTCCTGGAAGAACAGACAACGAAATCAAGAATGTGTGGAACACTCATCTGCGGAAGAGATTGGCTTTGAAGAAATCTTGTGGAGATGATCAATCAAAGGATTTA…	MAGVANSVYTSPNEEENEMRKGPWTLDEDTLLIHYIANHGEGHWNALAKCAGLKRTGKSCRLRWLNYLKPDIKRGNLTPQEQLLILELHAKWGNRWSKIAQHLPGRTDNEIKNYWRTRVQKQARQLNIESDSKRFLDAVRCFWMPTLRQKMEQTSSLSLDPPSSSSSHSNYLTSQISIAPSLSTSPQTCSVPSSPPSKVVSHVSDYSPIGTSSPSHNSLSSDSLISQLPQITEQPASSSYAFEALNDNYYMDYDMEGFSLDPVSEMASFDTSQFDCQMAESDWIPSNYMTDTLWNMQGM
Rmu_sc0013825.1_g000001.1 /fd	RmMYB64	ATGGAAGGAGAAGATGGTGCTGCTTCTGATCATCTTCACCATCATCATGGTGTTTATGGGTTTCAAAACAATCACATACAAACTCCTCATCAGCATCACAACCAACTCTTCAGGCCTGGTCCTCCGTTGACAGCCATAGACAGGTTCCTGTGGTCTCAAAACAATGCAAAGAACAAAGAGAGACTCGTCTCCTCAAATGGGTTTTCCTCATTTGGTGGTGCAATGGGTGATCTGCAGACTTGTTCGAATTGGCCGCCGAGTAGTCTCAGAGAGGCTAGCTTGGATGAACTGCTTTTTCTTGATCATGGTGAGGCCATGACTTGGCCTCCAGAGAAAATTCAAAACCCTAACATGGGGTTCAAAGAAGATCAAGTGAAGGTGGGTTCTAAAGGGGTGGGA…	MGGKGRTPCCDKSQVKRGPWSPSEDLRLISFIQKHGHGNWRALPKQAGLLRCGKSCRLRWINYLRPDLKRGNFTKEEEESIIKLHETWGNKWSKIASHFPGRTDNEIKNVWNTHLRKRLALKKSCGDDQSKDLSSITSSSSSSSSASFQLSRGKPSVGSTAEFEHQSNHECNMSKNRNDCELPNSTTIQEKLDQNILMEVTNQVRVDDAKGVKTLTISSSFSSHDSSNGSSSSQGGGISRPDDLVFDFEGAYEPQIADKEVFEIPFESDHDFWNMLDEFVPFQSNPEPLLPQADQTYQSSNLELVESGKWLSYLESELGLEDSTKTEINNQDFVMKDATEQLVPEKYCDKLPKPAEIDQDMDDYFGMWPSWPDNSGN
Rmu_sc0002888.1_g000030.1 /fd	RmMYB6a	ATGGGAAGAAGCTCTCGCTCCGAAAAGGAGGGAATGAAGAAAGGAGCGTGGACCGCCCGAGAAGACCAGATTCTGATAGACTACGTCAAAAAGCACGGTGAAGGCAAATGGGGAAAAATTTCAAAAGAAACAGGCCTGAAAAGATGTGGGAAGAGTGTGAGACTTAGGTGGTTGAATTATTTGAGGCCTGATATTAAGAGAGGCAACATTGCAGATGATGAAGAGGAGCTCATCATCAGGCTCCACAGACTTTTGGGCAACAGATGGTCATTGATAGCCGGAAGAATACCTGGTCGAACTGACAATGAGATTAAAAACTACTGGAATTCCACTCTAAGGAGGAAGCTACAGCAAGAAAATCACTTAAATGAGATCAAGGAGAACTCCTCATCCCCCAGC…	MEGEDGAASDHLHHHHGVYGFQNNHIQTPHQHHNQLFRPGPPLTAIDRFLWSQNNAKNKERLVSSNGFSSFGGAMGDLQTCSNWPPSSLREASLDELLFLDHGEAMTWPPEKIQNPNMGFKEDQVKVGSKGVGKKAKKGSSVPLIKGQWTDEEDRKLMRLVKQYGVRKWAQIAEKLVGRAGKQCRERWHNHLRPDIKKDSWTEEEEKILVEAHAEVGNRWAEIAKRIPGRTENAIKNHWNATKRRQNSRRKNKQTDAKNGSSSSNKPPQPSILQNYIRSKNFNNKANNNSSSNATPTPSNISTTTPTSSSTLTQEEPSKIPFNIFLSDPSDLSSCEHSPLNITADSYSDEELLFMQNFFNNNNVHNHNQQQQPLPIDNYNNGLTANPMDTTDWFVTSTP…
Rmu_sc0006317.1_g000008.1 /fd	RmMYB6b	ATGAGGAAACCCTGCTGCGACAAGCAAGACACGAACAAAGGAGCTTGGTCGAAACAAGAAGACCAGAAGCTCATCGATTACATTCGCAAACATGGTGAGGGTTGTTGGCGTACCCTCCCTCAAGCTGCAGGCCTTCTTCGATGCGGTAAAAGTTGCAGACTTCGGTGGATAAACTATCTACGGCCAGACCTTAAAAGAGGCAAGTTTGCTGAAGATGAAGAAGACCTCATCATTAAACTTCATGCACTCCTAGGCAATCGGTGGTCGCTTATTGCTGGAAGATTGCCGGGACGTACAGACAATGAAGTGAAGAACTATTGGAACTCGCATTTGAGAAGAAAGCTTATGAACATGGGTATAGATCCAAACAACCATCGACCAACCAACACTCTCCTCCCT…	MGRSSRSEKEGMKKGAWTAREDQILIDYVKKHGEGKWGKISKETGLKRCGKSVRLRWLNYLRPDIKRGNIADDEEELIIRLHRLLGNRWSLIAGRIPGRTDNEIKNYWNSTLRRKLQQENHLNEIKENSSSPSGSGASEDDPHSTKNNGELGGGMVEPTSSYCFTNHNEKKEDHERCHLESTTTTTTNKTTFFSSATVEAEANKNDIELAGDDLSNDVTWNDFIMDLNEGQLDISEFLQTDFSKLCELESPMKVEVGGCSTNHELPNNWAGGRS
Rmu_sc0004000.1_g000004.1 /fd	RmMYB73	ATGGCTGTGAATCGCAAGGAAATGGATCGGATGGATCGGATCAAGGGTCCGTGGAGCCCCGAGGAGGACGACGCTCTGCAGAGCCTAGTCCAGAAGCACGGGCCGCGGAACTGGTCTTTGATAAGCAAGGCCATTCCGGGGCGGTCCGGCAAGTCGTGCCGTCTCAGATGGTGTAACCAGCTCTCGCCGCAGGTGGAGCACCGCGCCTTCACTCCCGAAGAGGACGACACCATCATCCGAGCCCACGCGCGGTTCGGCAACAAGTGGGCCACAATCGCCAGGCTCCTCAACGGCCGCACCGACAACGCGATCAAAAACCACTGGAACTCCACCCTCAAGCGCAAGTGCTCTTCCATGAGCGACGACGGCGACGGTAACGGAAACGTGTTCGGTGGAGGG…	MRKPCCDKQDTNKGAWSKQEDQKLIDYIRKHGEGCWRTLPQAAGLLRCGKSCRLRWINYLRPDLKRGKFAEDEEDLIIKLHALLGNRWSLIAGRLPGRTDNEVKNYWNSHLRRKLMNMGIDPNNHRPTNTLLPRPHNHHQSPPQTLKSPAGSGINNFNHEPVVIESKSSRGDDQNCEQVSDGRSCLEDDSSCGGHHLPDLNLDLTVHLSAPNFSSPNDDHQCLIKELNEPIHRPHLNISDPPEMLIGTKSAIFASSTTLPLFR
Rmu_sc0001846.1_g000012.1 /fd	RmMYB73La	ATGGATGATTATGGAGCTTCTCCTGCGGGCTCTGCAGATGAGTCAAAGTCGACGTCTTGCCCAAGAGGACACTGGCGGCCCGCAGAAGATGAAAGACTCCGGCAACTTGTCGAACAGTACGGTGCCCAGAACTGGAACTCCATAGCAGAGAAGCTTCAAGGAAGATCAGGGAAAAGTTGTAGGTTGAGGTGGTTTAATCAACTAGACCCAAGAATCAACAGAAGGCCGTTTAGTGAAGAAGAAGAAGAGAGGCTTCTAGCGGCTCATCGGATTCACGGAAACAAGTGGGCAATGATAGCAAGACTGTTTCCAGGTCGGACTGATAATGCCGTGAAGAATCACTGGCATGTTATCATGGCCAGACGGCAAAGAGAGCAATCTAAGCTAATTTGTGGTGGA…	MAVNRKEMDRMDRIKGPWSPEEDDALQSLVQKHGPRNWSLISKAIPGRSGKSCRLRWCNQLSPQVEHRAFTPEEDDTIIRAHARFGNKWATIARLLNGRTDNAIKNHWNSTLKRKCSSMSDDGDGNGNVFGGGYDGNFHVQPPLKRSVSAGSGVPVSTELFMNPGSPSGSDVSDSSVQVMSPSHVYRPVARAGGVLPPVETTSSSNNNNNSHINLNSDPPTSLSLSLPGVDSCEVSNRVAATESTIQNQAHPAPAPGHINLNSDPPTSLSLSLPGVDSCEVSNRVAATESTIQNQAHPAPAPVSDPMRSFPAELLELMQGMIKKEVRSYMEGLEQSGFGMMKQQNDGFRNVAVKRIGISRIE
Rmu_sc0007811.1_g000007.1 /fd	RmMYB73Lb	ATGGAACCGGAACTGGCCGAGGACTCCGTCGCCGTCATCGAAGTCGACGCCTCCGAAGACGACGCCGGAAGCGGCAAAGATGAGGCGGCCAAAGGCGGAAAGGGTAAGAAGGGAAAGAGCAAAGTGAGGGGGCCTTGGTCTCCGGAAGAAGACAAGGTGCTGAGTCGGCTGGTGAGTAAGTTCGGGGCCAGGAATTGGAGCTTGATCGCCCGCGGAATTTCCGGACGGTCCGGCAAGTCTTGCCGGCTCCGGTGGTGTAACCAGCTCGACCCCATCCTTAAGCGCAAGCCCTTTTCTGAGGAGGAAGATCAGATGATAATTGCAGCCCACACAATCCATGGAAACAAATGGGCTGCAATCGCAAGGCTTTTACCAGGAAGAACAGATAATGCCATAAAA…	MDDYGASPAGSADESKSTSCPRGHWRPAEDERLRQLVEQYGAQNWNSIAEKLQGRSGKSCRLRWFNQLDPRINRRPFSEEEEERLLAAHRIHGNKWAMIARLFPGRTDNAVKNHWHVIMARRQREQSKLICGGNKRSYQDFLISSDSISNTSSSISNTFDSRKLKSSTGFDHNQNSTTTSTVFEFRNPGKGRAMSFMESSRPKSSSSHNWNFASMTSSLSIPNSTSSAGFLRGSEISNYKVSECLKGNSDHLFVHRINGQYSSPAFVYGRYRGSGSSSTFGLPNPRRVNVPINPFGYLSSGTSPLGDIHEQHGSRMILKKEYLRAASSTTFEDHPHPHHDSSIEHNKEVPFIDFLGVGISS
Rmu_sc0006984.1_g000003.1 /fd	RmMYB80	ATGGGTCGGATTCCATGCTGTGAGAAGGACAATGTGAAAAGGGGACAGTGGACTCCTGAAGAAGATAACAAGCTCTCTTCCTACATTGGCCAGCACGGTACTCGCAATTGGCGTCTCATCCCAAAGAATGCCGGTTTACAAAGATGTGGGAAGAGTTGTCGGCTACGTTGGACCAACTACCTTCGACCTGACCTCAAGCACGGGCAGTTCTCAGAGGCGGAAGAGCAAACCATTGTCAAGCTCCACTCTGTTGTTGGCAACCGATGGTCCTTAATTGCTGCACAACTTCCTGGTCGCACTGACAATGATGTGAAAAACCACTGGAATACAAAGCTCAAGAAGAAGCTGTCGGGTATGGGGATAGATCCAGTCACCCACAAACCCTTTTCCCACCTCATG…	MEPELAEDSVAVIEVDASEDDAGSGKDEAAKGGKGKKGKSKVRGPWSPEEDKVLSRLVSKFGARNWSLIARGISGRSGKSCRLRWCNQLDPILKRKPFSEEEDQMIIAAHTIHGNKWAAIARLLPGRTDNAIKNHWNSTLRRRDPDRMKSESGNMVEDISLDKTIASSEETLSNGDVNSSKSMEGKEVSSLEYTDDQHEDKVSTDGLYSNEAREPCTLFRPVARVSAFSVYNHLGGQDPSSSLQRPIPVQGPLVQAAKLDVGICKLVEGIYGEWSVPDQCGHGCCCTQNGRNTENSLLGPDFVEFSEPPCFPSFELAAIATDISNLAWLKSGLENSSARVTGDAAGSIPSHASQGQLGHFEESRMNHLFHHEERKDRLMSMKTNVLST
Rmu_sc0016972.1_g000001.1 /fd	RmMYB86a	ATGTCGATAAATACGGGCCATAACTGTTGCAGCAAACAGAAAGTGAAAAGAGGACTATGGTCTCCTGAAGAAGATGAGAAGCTAATGAATCACATACACAACTCTGGCCATGGTTCCTGGAGCTCTATACCAAAAATAGCTGGTTTGGAGAGGTGTGGGAAGAGTTGCAGGTTGAGGTGGATAAACTACTTGAGGCCAGATCTGAAGAGGGGTTCATTTTCTGAGCAAGAAGAGAGAATCATCATAGATGTTCATAGGGTTGTAGGCAACAGGTGGGCTCAGATAGCCAAGCAAATGCCAGGAAGAACAGACAACGAGGTCAAGAATTTCTGGAACTCATGCATCAAGAAGAAACTCATCTCTCAAGGTCTGGATCCCAACACTCACAATCTTATCATC…	MGRIPCCEKDNVKRGQWTPEEDNKLSSYIGQHGTRNWRLIPKNAGLQRCGKSCRLRWTNYLRPDLKHGQFSEAEEQTIVKLHSVVGNRWSLIAAQLPGRTDNDVKNHWNTKLKKKLSGMGIDPVTHKPFSHLMAEIATTLAPPNVANLAEAALGCFKDEMLHLLTKKPIDFQFQHSNTTPGNRTATYINNKEEEDDTIEKIKIGLSRAMQEPDMLHSQKSWDPTGATSANLTGNCSAFPLHSISGFQYGLSTFGNEGGGSPWSQSMCTGSTCTGADQQGHLHDKLDEEIGEESEGGKELRNGSNIFNSDSILWDLPSDDLMNPIV
Rmu_sc0001735.1_g000008.1 /fd	RmMYB86b	ATGGGCCATCGGTGCTGTGGTAAACATAAGGTTAAGAGAGGTCTTTGGTCGCCGGAAGAAGACGACAAGCTCATCAAACATGTCACCACCCACGGCCATGGCAGTTGGAGTTCTGTCCCTAAACATGCAGGGTTGGAGAGGTGCGGAAAGAGTTGCAGGTTGAGATGGATAAACTATTTGAGACCAGAACTAAAGAGAGGCTCCTTTACTTCTGAAGAAGAACAGATTATTATTGATGTCCACAGAATTTTAGGCAACAGATGGGCTCAGATAGCGAAGCATCTACCTGGAAGGACAGACAATGAAGTGAAGAATTTCTGGAATTCTTGCATTAAGAAGAAGCTCATGTCACAAGGTTTGGACCCGCAGACCCATAACTTGATCTCTTCTCATAAAAGG…	MSINTGHNCCSKQKVKRGLWSPEEDEKLMNHIHNSGHGSWSSIPKIAGLERCGKSCRLRWINYLRPDLKRGSFSEQEERIIIDVHRVVGNRWAQIAKQMPGRTDNEVKNFWNSCIKKKLISQGLDPNTHNLIIPAASDSKSSHDSSSLHGSSSSTIPTYLYQSPNMVWTDHFQEQYPRGSQPSMEKSKVQTISSFSHHSYPSELDIIIENCKTWGTGSSIESTTAEPAEMEYMSMKAEQKEESCEVQTENGSCSVLNYNGRQTSMDASSFGSCNLSNFDFVESTLVPCEMDYHLRPIMDQLGCYRN
Rmu_sc0002040.1_g000020.1 /fd	RmMYB86c	ATGGGACGCCATTCGTGTTGTTTGAAGCAAAAGTTAAGGAAAGGTCTCTGGTCACCGGAAGAAGACGAGAAGCTCTTCAATTACATCACTAGATTTGGCGTCGGTTGCTGGAGCTCTGTCCCCAAGCTTGCAGGGTTGCAAAGATGTGGTAAGAGTTGCAGGTTGAGATGGATAAACTACTTGAGGCCTGATTTAAAGAGAGGAATGTTCTCTCAGCAAGAAGAGGACCTCATTATTAGTCTCCATGAAGTTCTTGGGAACAGGTGGGCTCAAATTGCAGCACAATTGCCAGGAAGAACAGATAATGAGATAAAGAACTTCTGGAATTCGTGTTTGAAGAAGAAGCTAATGAAGCAAGGGATTGACCCGACCACTCACAAGCCACTAACAGATGAAGAA…	MGRHSCCLKQKLRKGLWSPEEDEKLFNYITRFGVGCWSSVPKLAGLQRCGKSCRLRWINYLRPDLKRGMFSQQEEDLIISLHEVLGNRWAQIAAQLPGRTDNEIKNFWNSCLKKKLMKQGIDPTTHKPLTDEELLKDDKTNIVKCSELNNESSSLPLVPAHEHHHELPMANSSQGPTFLVNDSSYFDGTSTGISTTQTSRAAAAFDSLSYFEFQTSIDPSGYNSDLVTSTQYHPPTTNSIRPSFNYEAIIGYNSMPSLANSDHGSMSGTDFSFSSSNSSTAGFHMNHNNNVVENNAGTFSWDINTENKLESLFHQFDGPKSEELVMMKPNSSSWEEGQLHHQHQNSVDFSSYPLTSLSEDLTGANFDVFQHI
Rmu_sc0009959.1_g000001.1 /partial/pd	RmMYB8a	ATGCAGACGCCTCAGCTGGTGCAACTGCTTTGCTATTGGATCTGCTTGTTTCTCATGCCTCAGGGCCATAGCATAGGCCTTGTTCACTGTGGGAAGCGAATCCAGACCAATTATGTTGCTGTGGACTGTAGCGTAGCTTTCGTTAAGACCCATAAGGAATTTCATTGTTTTCTATGTCTCCATGTAACACTTCACTTCGGTGGCAATATTGCAAGTGCAGGCAGGAAAGCCACAAAGCGAATCCGCAGTAGTGGTCTAAAGCCCTCGATATATCCAGACTTCCAGTTCCAGAGAAAGATGGTGAGAAAACCATGCTGTAACAAAGACAGTGTGAACAAGGGAGCGTGGTCTGCTGAGGAAGATGAACTCCTAATTCGCTACATGAGAACACATGGAATG…	MQTPQLVQLLCYWICLFLMPQGHSIGLVHCGKRIQTNYVAVDCSVAFVKTHKEFHCFLCLHVTLHFGGNIASAGRKATKRIRSSGLKPSIYPDFQFQRKMVRKPCCNKDSVNKGAWSAEEDELLIRYMRTHGMCKWRDIPQGAGLNRCEKSCRLRWRNYLRPDIVRGNISDDEEDLIIRLHKLLGNRWSLIAGRLPGRTDNEIKNHWNSNLRKRLLKKAPRNQSKAHHPRGEP
Rmu_sc0004331.1_g000015.1 /fd	RmMYB8b	ATGGGAAGAGCACCGTGTTGTGACAAAAACGGCCTGAAAAAAGGTCCATGGACGCCGGAGGAAGATCAGAAGCTCGTTGATTATATCCAGAAACACGGTTATGGCAACTGGAGGACGCTTCCAAAGAATGCAGAACTGCAAAGATGTGGAAAGAGCTGCCGTCTCAGGTGGACCAACTATCTGCGGCCTGATATCAAACGAGGAAGATTTTCTTTTGAAGAGGAGGAGACAATTGTTCAACTGCATAGCATTTTGGGCAACAAGTGGTCTGCTATTGCTGCTCGTTTGCCTGGAAGAACCGACAATGAAATCAAGAACTACTGGAACACCCACATTAGGAAGAGGCTTCTCCGAATGGGAATCGATCCGGTTACTCACAGTCCTCGGCTCGATCTGCTT…	MGRAPCCDKNGLKKGPWTPEEDQKLVDYIQKHGYGNWRTLPKNAELQRCGKSCRLRWTNYLRPDIKRGRFSFEEEETIVQLHSILGNKWSAIAARLPGRTDNEIKNYWNTHIRKRLLRMGIDPVTHSPRLDLLDFSSILYNSSHHHPQVNFSRLLGMQQMGLNPELLRLATILSSHRERNSNFFIQNDQQQHLCSPQNDQIPVQLVQSSQLQEPFQENVPVCATLNTGDIPFPHEVQPPTITDFSSQNCQISEWQSNGEAPSNFTENQYVQLPSLTYYDGSSDHQIVSDVSPETSNLYSYNSNNHNFNFTSVFSTPCSSPTPLNSNSTTYFNSGTEDERESYCSNILKFDIPNILDDFIHV
Rmu_sc0003120.1_g000001.1 /fd	RmMYB8c	ATGGGTAGAGGTCCTCGGTGTTCTAAGGATGGACTCAACAAAGGGGCTTGGATGGCAGCCGAAGACAAATTGCTCTTGGATTACATCAAGAACCACGGTGAAGGCAAATGGAGCAATGTTGCCAAAGAAACAGGTCTTAAGAGATGCGGGAAGAGCTGCCGGCTTCGGTGGATGAACTATCTGAGACCAGATATTAAGAGAGGCAGCATTTCAGATGATGAAGAAGAGCTAATCATCAGACTCCATAAGCTCCTGGGCAACAGATGGTCTCTGATAGCAGGAAGACTTCCCGGGCGAACAGACAATGAAATCAAGAATTACTGGAACTCCAACTTAGCCAAGAAAATGGCACAAGCTCAAAGTTCACCTCAGTCCAAATGCAATAATGTCATTGTCCAG…	MGRGPRCSKDGLNKGAWMAAEDKLLLDYIKNHGEGKWSNVAKETGLKRCGKSCRLRWMNYLRPDIKRGSISDDEEELIIRLHKLLGNRWSLIAGRLPGRTDNEIKNYWNSNLAKKMAQAQSSPQSKCNNVIVQQTPDQVQPQPQQQCSRVSTVVPPRPPTSTTAAASPLHHRTLDDFCNNVAINNTNNLIKAVNSVDSRISSEDVSLSTTTTTNTTSDGDDQLGSSPTNFMMDFNTDDHEDFCKILDCDFANLNNAIDGDDEHQGSPVLVLPKQMMDKNIQAADFGSLASFLESDEDWLGNDLNVMLS
Rmu_sc0001298.1_g000013.1 /fd	RmMYB8d	ATGGCTCCAAAGAAAGAAGAGTCCGCTAAACGAGAAGTGATGAAGATGAAGTCGTTGGAAGCTGTTATGAAAAACACGAAAAGGGAGGTCAACAAGGGAGCTTGGACAGCTGAGGAAGATCAGAAGCTAGCTGAGGTTACTGCAATTCATGGTGCTAAAAAGTGGAAGTCAATTGCAGCCAAAGCAGGGCTGAATCGGTGTGGTAAGAGTTGCAGGCTAAGATGGCTGAACTATCTAAGACCAAACATCAAGAGAGGCAACATATCTGACCAAGAAGAGGACTTGATTCTCAGGCTGCACAAACTCCTTGGAAATAGGTGGTCTTTGATTGCCGGAAGATTGCCGGGTCGAACAGACAATGAGATAAAGAACTACTGGAACTCTCATTTGAGCAAGAGA…	MAPKKEESAKREVMKMKSLEAVMKNTKREVNKGAWTAEEDQKLAEVTAIHGAKKWKSIAAKAGLNRCGKSCRLRWLNYLRPNIKRGNISDQEEDLILRLHKLLGNRWSLIAGRLPGRTDNEIKNYWNSHLSKRINQKEKQRNTGGDDDSTRQISTVDQKPGTHLGEQNKIHGEMKQDSSSEEGTTTTTTTSASNKGGDDHENYSNLDIDIDDFFDFSNEGPFNLEWVNKFLY
Rmu_ssc0000368.1_g000058.1 /fd	RmMYB8e	ATGGGAAGGGCTCCTTGTTGTTCAAAGGTTGGTTTGCACAGAGGTCCATGGACTCCCAGAGAGGACACATTACTCACCAAATATATTGAAGCTCATGGTGAAGGCCATTGGAGATCCTTGCCCAAAAAAGCCGGCCTCCTTAGGTGTGGGAAGAGTTGCAGGCTAAGATGGATGAACTACCTAAGGCCAGATATCAAGAGAGGAAACATTACTCCAGACGAAGATGACCTAATTATCCGACTGCATTCACTTCTCGGAAACCGCTGGTCTCTCATCGCCGGTAGACTTCCGGGTCGAACCGATAACGAGATCAAGAACTATTGGAACACCCATCTCAGCAAAAGGCTCATGAGCGAAGGAACTGACCCTAACACGCACCAAAAACTATCCCAGCCTCCT…	MGRAPCCSKVGLHRGPWTPREDTLLTKYIEAHGEGHWRSLPKKAGLLRCGKSCRLRWMNYLRPDIKRGNITPDEDDLIIRLHSLLGNRWSLIAGRLPGRTDNEIKNYWNTHLSKRLMSEGTDPNTHQKLSQPPAPKENKRKKKQNHKAKNKNNTEDRIVPQKPKVHLPKPTRVTSFVNLPRNDSFTTASTTVSSSQDQVLDHVNNIIPWSDFKEGGVVFSVIDGSSSDFECDQSRIILNVVAGDDEGHNLENIYEEYLQALLKTTDQDQNCQVELDSFAESLLI
Rmu_sc0010880.1_g000002.1 /fd	RmMYB8f	ATGGGTCACCACTACTGCTGCAAAGAACGGAAGGTTAAGAGGGGCCTTTGGTCCCCTGAGGAAGATGAAAAGCTGTTGAGATACATCACTACCTATGGCCATGGATGTTGGAGAAAAGTCCCTGAGCAAGCTGGGCTACAAAGGTGTGGTAAGAGCTGTAGACTGAGATGGCTCAATTACTTGAGACCTGATATCAAAAGAGGAGTGTTTACACCAGATGAGGAGAAATTGATTATTAGACTGCATGGGGTTGTAGGGAACAGATGGGCGCATATCGCAAAGTGTCTTCCAGGAAGAACTGACAATGAAATAAAGAACTACTGGAACTCATGGATAAAGAAGAAGCTAGAGAAGCCTTCTTCACCAATGACCACATCTGCTGATCATCATCATCAATAT…	MGHHYCCKERKVKRGLWSPEEDEKLLRYITTYGHGCWRKVPEQAGLQRCGKSCRLRWLNYLRPDIKRGVFTPDEEKLIIRLHGVVGNRWAHIAKCLPGRTDNEIKNYWNSWIKKKLEKPSSPMTTSADHHHQYSQMACLNPNNQDHIVNQTFIARPSAYPLYMFEAASLDHDGTTRANNININVHVDQHFPLNVNSNNLGACILDRHNVQPLPSTAPFTNMDANLLMPSLIGSTTTVNANMVEVESCSNIDEEGDISMECLQSHQDLIAVVHSRQQQPCSNFHFCWDTVEEQHGGDEIAGPLHRNTGANMMSSSLPSYL
Rmu_sc0004132.1_g000011.1 /fd	RmMYB92	ATGGGAAAATCTCTTTGTTGTGATGAACCTGGACTCAAGAAAGGACCCTGGACTCCCGAAGAGGATCAAAAGCTTGTGCAGTACATCCAACAACACGGTCATGGAAGCTGGCGAGCTCTTCCCAAGCTTGCAGGTCTCAACAGATGTGGCAAGAGCTGTAGGTTGAGATGGACAAATTACTTAAGACCTGATATAAAAAGAGGCAATTTTTCTCAAGAGGAGGAGCAGACCATTCTACATCTCCATTCTATCCTCGGAAACAAGTACACACTTCTTCAACCAATTTCCTCGATCCGATCAGGTTCATTTCTGTCTCTATGCTTGGAATATCACAAACTGACTCGTCTTATTTTAACTACAAGATGGTCAGCAATTGCAACACATCTAGACGGACGAACT…	MGKSLCCDEPGLKKGPWTPEEDQKLVQYIQQHGHGSWRALPKLAGLNRCGKSCRLRWTNYLRPDIKRGNFSQEEEQTILHLHSILGNKYTLLQPISSIRSGSFLSLCLEYHKLTRLILTTRWSAIATHLDGRTDNEIKNFWNTHLKKKLIQMGIDPMTHQPRTDLFSNLQDLLQPQYQLLDQHAATTLHGAAEAVAQLVKLQYLQQQYVLQSHLLNPSVGSYAPPPIKENLPVLNSSHVVLENPSSFSQPLHYGTLEPHQDDPQVRFSTFAVPEIDEMGQGSKFTPMVSSLCQAEKNPPEIDEYCPWLLQYSSNIPTPLGSTLINNPGDASCSTSSNGGIRSSTSSSYWPELFLEETKTNYD
Rmu_sc0005949.1_g000025.1 /fd	RmMYB93	ATGGGAAGGTCTCCTTGTTGTGATGATAGTGGCCTCAAGAAAGGTCCCTGGACTCCTGAAGAAGATCAGAAGCTCATGAATTACATACAGAAACATGGCCATGGAAGCTGGAGAGCCCTTCCCAAACTTGCAGGGTTGAACAGATGTGGCAAGAGTTGCAGGCTAAGATGGACAAACTACCTTAGGCCAGATATAAAGAGAGGCAAATTTTCTCAAGAAGAAGAGCAAACAATTCTGAACCTTCATTCCATCCTTGGCAACAAATGGTCAGCAATTGCAAGCCACCTACCGGGTAGGACGGACAACGAAATAAAAAATTTCTGGAACACCCATTTGAAGAAAAAGCTGATTCAGATGGGTTTTGATCCGATGACCCACCGGCCTCGAACTGACATTTTC…	MGRSPCCDDSGLKKGPWTPEEDQKLMNYIQKHGHGSWRALPKLAGLNRCGKSCRLRWTNYLRPDIKRGKFSQEEEQTILNLHSILGNKWSAIASHLPGRTDNEIKNFWNTHLKKKLIQMGFDPMTHRPRTDIFSSLPHLLALVNLKDLIDQGSGQTSWDEQALRLQAEAAQMAKIQYLQYLLQPQASTSNNLSDFTDMETIGLLNSLCSSIKDVNPVFGSSQLETSAQYLGSSSVQDSIPFSPLPDLQMVPSSAYQKDMITNQAPDQFTVLSQLDNSPNNNSWNIPSSSNTSTPSPPSVVVPPVTETSTSNNNMGDACSTTTSSYGGVATISAWSDLLLEDYPFFNEIS
Rmu_ssc0000092.1_g000001.1 /fd	RmMYB98	ATGGAGATTAACAAGCTAAGAGAAAACCTGGCCTCCCAAATCCCATTACTAGTGCCAGAGAACAACAGCTACATGATGAAACCCCACAACATGAAAGATGAGTTCATCCCATTTGAAGCTTCTTCTTCCTCAAAGGGTTACCTTCAAGATTTTCACCATCTTGATAATCAGTTTCATCAATATGCTAATGGGTCCTCATCAAATCCCATGTTTGGGGTCCAAAATCCATGTTTTGAACCTTATTACAATGACAACAATGCCTACACTTGTGACCAAGGCTCACCCACAGATGTAAATTTCTATGAGTGCAAGCCTCTAAACATTGCAGACAATTTGGGACATGGTCAAGTCTTGGACAACTTCCAAAGCTTGAATTTCCCACATCCCAGATCAAATTCC…	MEINKLRENLASQIPLLVPENNSYMMKPHNMKDEFIPFEASSSSKGYLQDFHHLDNQFHQYANGSSSNPMFGVQNPCFEPYYNDNNAYTCDQGSPTDVNFYECKPLNIADNLGHGQVLDNFQSLNFPHPRSNSIGHMMGISHRSGTNFLPLTNSQDIKPMSFVAPDEVSCINSENGYYKRAGINHKGTSRLSTIARAGSTFKGRKKNNVVKGQWTIDEDRVLIQLVAQYGVRKWSHIAQMLPGRIGKQCRERWHNHLRPDIKKDTWSEEEDKILIQAHAEIGNKWAEIAKRLPGRTENSIKNHWNATKRRQYSKRKCRSKYPRGSLLQDYIKSLNLDASPNTGRQRKNNNNSSNSSPADHNNASTASTKVQSQINVGFNSESDSRLVPNYEFSEEDPDF…
Rmu_sc0006592.1_g000003.1 /fd	RmODO1a	ATGGGAAGGCAGCCTTGCTGTGACAAACTTGGGGTTAAGAAAGGGCCATGGACAGCCGAGGAGGATAAGAAGCTCATCAACTTCATTCTCACAAATGGCCAGTGTTGCTGGAGAGCCGTCCCCAAGCTCGCTGGGCTTCGCCGCTGTGGCAAGAGTTGCAGACTCCGTTGGACCAACTATCTCCGTCCCGACTTGAAGAGAGGCCTCCTTACAGAATCTGAAGAACAGTTGGTCATTGATCTCCATGCTCGTCTCGGAAATAGGTGGTCCAAGATTGCAGCCAGATTGCCAGGGAGGACTGATAATGAAATCAAGAATCACTGGAACACCCACATCAAGAAAAAGCTGCTTAGAATGGGAATTGATCCCGTCACGCATGAACCCCTCCACAAAGATCAA…	MGRQPCCDKLGVKKGPWTAEEDKKLINFILTNGQCCWRAVPKLAGLRRCGKSCRLRWTNYLRPDLKRGLLTESEEQLVIDLHARLGNRWSKIAARLPGRTDNEIKNHWNTHIKKKLLRMGIDPVTHEPLHKDQDDLINKETIISSHTNQANNILPQSTTENSSSNSSPAENSSSSSSPNENSSGDDQSTLIDSICNVDESLMNSLWVDETPLIDALWNSDQVPDGGNYIENGMGVQSNWEENCSWLLDCQDFGVHDFGVDCFIETELNALDTLGMEKI
Rmu_sc0004947.1_g000027.1 /fd	RmODO1b	ATGGGCAGGCAACCTTGTTGTGACAAGCTTGGCGTCAAGAAAGGTCCATGGACAGCCGAGGAAGACAAGAAACTAGTGAACTTCATCCTCACTCATGGCCAATGCTGCTGGCGCGCCGTCCCCAAGCTCGCGGGTCTGCGCCGCTGCGGCAAGAGCTGCCGCCTCCGCTGGACTAACTATCTCCGGCCGGACTTGAAGCGAGGGCTACTCAATGAAGCTGAGGAGCAGCTTGTTATTGACCTCCATGCTAGTCTTGGCAATAGGTGGTCTAAAATTGCAGCAAGACTGCCTGGAAGAACAGACAATGAGATCAAGAATCACTGGAATACACACATTAAGAAAAAACTTATCAAGATGGGGATTGATCCAATTACTCATGCGCCTCTCCAAAAACAAGTC…	MGRQPCCDKLGVKKGPWTAEEDKKLVNFILTHGQCCWRAVPKLAGLRRCGKSCRLRWTNYLRPDLKRGLLNEAEEQLVIDLHASLGNRWSKIAARLPGRTDNEIKNHWNTHIKKKLIKMGIDPITHAPLQKQVTTTPQETPCEANIQQSVNIPEHGVSSNENGSSATENSSSNEAQSLIEVNANGDDDPLVNYILSDTFLQDWSWNFPAVEDNYSDLGLSSTSSEDSSAWFMDCKDFGVEDFELGNCIN
Rmu_sc0002348.1_g000005.1 /fd	RmRAX1a	ATGGGAAGAGCTCCATGTTGTGACAAAGCTAGTGTCAAAAGAGGGCAATGGTCTCCTGAGGAAGATGAAGCTCTCAAGACTTACCTTGAGACTCATGGAACTGGTGGCAATTGGATTCATCTGCCTCAAAAAGCTGGGCTTAGGAGATGTGGGAAGAGCTGCCGTCTGCGGTGGTTGAACTATCTGAGGCCAGACATCAAACATGGAGGCTTCACTGAAGAGGAGGACAACATTATCTGTAACCTCTACACTCAAATGGGAAGCCGATGGTCATACATAGCTGCTCAAATGCCTGGAAGAACAGACAATGATGTGAAGAACTATTGGAACACCAAATTGAAGAAGAGGTTGTTTAGCAAAAACCCAAATGCCTCCTCACTCACACTGCCTTGTGTTCCA…	MGRAPCCDKASVKRGQWSPEEDEALKTYLETHGTGGNWIHLPQKAGLRRCGKSCRLRWLNYLRPDIKHGGFTEEEDNIICNLYTQMGSRWSYIAAQMPGRTDNDVKNYWNTKLKKRLFSKNPNASSLTLPCVPKLETNDEFQTQIPPTLMLSDYNSGLNAYDQSLSLKPNPLHNSKLTGLSQFGASSVSMSQDGSSVSDSSSIAAVDHGLLHGNSFINEDAAGIPMDFGFGGLSCDVVNQMWFGEKANEVVHPTCSTGLDGDFFFC
Rmu_sc0002348.1_g000027.1 /fd	RmRAX1b	ATGGGGAGAGCTCCTTGTTGTGACAAAGCGAACGTGAAGAGAGGGCCGTGGTCACCTGAAGAAGATTCCAAGCTCAAGTCGTATATTGAACTACACGGCACTGGTGGTAACTGGATTGCTTTGCCTCAAAAGATAGGGCTTAAGAGATGTGGGAAGAGCTGCCGGCTGAGATGGTTAAACTATCTGCGCCCGAACATCAAGCATGGAGGGTTTTCTGAAGAAGAGGACAACTTAATTTGCAGCCTCTATATAAGTATTGGAAGCAGGTGGTCTATAATTGCAGCACAACTGCCTGGAAGAACTGATAATGATATAAAGAACTACTGGAACACAAGGCTGAAGAAAAAGCTTCTGGGAAAGCACCGCAAGGAACACCAGGCTGCTGCGCGTAGATCCGCT…	MGRAPCCDKANVKRGPWSPEEDSKLKSYIELHGTGGNWIALPQKIGLKRCGKSCRLRWLNYLRPNIKHGGFSEEEDNLICSLYISIGSRWSIIAAQLPGRTDNDIKNYWNTRLKKKLLGKHRKEHQAAARRSAAGLKQQEIIKRGLIISSSSGNNNSMVNPVAAASQNPYWPELPVLQVPSIPNYSSPNQEVVVPSFNDHASIRKLLIKLGGRFHSDHHDNVAQPNIQDVYSSNGDIQLPVDQFPSSTQQIYHEESAANMHSSASLIAALASNNISNPGQFAQMNHYNNPADNAGYGGAVNMFQGGQSSNYFLSNELKDMVCNIDPEKLDGLEFLYSEDVMIMMNDRPISSTTNTSTSYGDQSTIGWSGDQMQLVYPPPLAASGLDYHEAMQRMIMPQD…
Rmu_sc0000508.1_g000008.1 /fd	RmRAX2	ATGGGAAGGGCTCCTTGTTGTGACAAGGCAAATGTTAAGAAGGGACCATGGTCACCAGAAGAAGACTCAAAGCTCAAAGAATACATTGACAAATATGGTACTGGGGGAAATTGGATCGCTCTCCCTCAGAAAGCTGGTTTGAAGAGATGTGGAAAAAGCTGCAGATTGAGATGGCTTAACTATCTGAGGCCAAACATCAAACATGGAGAATTTTCTGAGGAGGAAGACAGAATAATTTGCACCCTCTTTACTAGCATTGGAAGCAGGTGGTCGATTATAGCAGCTCAGCTGCCAGGAAGGACCGACAATGATATCAAGAACTACTGGAACACCAAGCTGAAGAAGAAACTCAGGGATATGCAGACTCATATGGCTCCTCCTTCATTAACAACTTCTCAG…	MGRAPCCDKANVKKGPWSPEEDSKLKEYIDKYGTGGNWIALPQKAGLKRCGKSCRLRWLNYLRPNIKHGEFSEEEDRIICTLFTSIGSRWSIIAAQLPGRTDNDIKNYWNTKLKKKLRDMQTHMAPPSLTTSQSHRSNPPPFPVSSSLHQFQNQPFHHQPLSLMHKDLNMMTYSTYTPTLTSPATPGSFSSGFEIMPNISTPLTNYSSLFQTQECLVGSMHYNHPAVKKNINLIMFGSEGSCSTSSDGSCNNNQISYESRRSGNIKQEEMGMGFQLEDQNQKFMMLNYGNSSSAAISDDHHNYINNNNQWGERPNGYNGNNTRFGDYDLEDVKQLISSSSTDINININNDNGSISNSLFSVDENKTDHKEKVMYFY
Rmu_sc0002383.1_g000019.1 /fd	RmRAX2L	ATGGGGAGAGCTCCTTGCTGTGACAAGGATAATGTGAAGAAAGGACCATGGTCACCTGAAGAAGATGCAAAGCTTAAAGAGTATATAGAAAAATATGGGACCGGAGGGAATTGGATTGCTCTTCCACAGAAAGCTGGTCTAAGGAGATGTGGAAAAAGTTGCAGATTAAGATGGCTTAACTATCTCAGGCCCAACATTAAACATGGAGAATTTTCTGATGAAGAAGATAAGATCATCTGCAACCTCTTTGCTAGCATTGGAAGCAGGTGGTCAATTATAGCAGCTCAATTGCCAGGAAGGACCGACAATGATATCAAGAACTACTGGAACACAAAGCTCAAGAAGAAACTCAACCAATATTCCATGATGGGCATAATTCCTCACCACTCCGCCACCTTC…	MGRAPCCDKDNVKKGPWSPEEDAKLKEYIEKYGTGGNWIALPQKAGLRRCGKSCRLRWLNYLRPNIKHGEFSDEEDKIICNLFASIGSRWSIIAAQLPGRTDNDIKNYWNTKLKKKLNQYSMMGIIPHHSATFSSLLHHQTSTSSSSPPSYRSSNNTSAPTYYTHQPRSFTSTANLESHIPFSPSLLSSTNTTTNAALQVGQESYVSQPLTQHYQAKDNILMFGGTTTEASCSSSDGSYGTGYGEVQLGLQNYFYNNGAEANNQKIMVSDNGLGLDHDQAPLDYGLEEIKQLISSSTTTSGGCNNFLFDENKTEEKVMMYY
Rmu_sc0000186.1_g000014.1 /fd	RmRAX3a	ATGGGGAGAGCTCCTTGCTGTGACAAAACCAAGGTCAAGAAAGGCCCATGGTCACCTGAAGAAGATGCCAAACTCAAGTCTTACATTGACAAGCATGGCACCGGTGGCAACTGGATTGCCTTGCCGCAGAAGATAGGTCTTAAAAGATGTGGGAAGAGCTGTCGGCTGAGATGGTTGAATTATCTCCGGCCCAATATCAAACACGGTGGGTTCTCTGAGGAAGAAGATAACATCATCTGCAGCCTCTATATCAATATTGGAAGCAGGTGGTCTATCATTGCAGCCCAATTACCCGGGCGAACTGATAATGATATTAAGAATTACTGGAACACAAGACTGAAGAAGAAGCTTTTGGGCAAGCAGCGGAAAGAACAACAGGCACAGAATCGTAAAGCCGCC…	MGRAPCCDKTKVKKGPWSPEEDAKLKSYIDKHGTGGNWIALPQKIGLKRCGKSCRLRWLNYLRPNIKHGGFSEEEDNIICSLYINIGSRWSIIAAQLPGRTDNDIKNYWNTRLKKKLLGKQRKEQQAQNRKAAASLKQEIKRSSTTTNFHLPPDDFVNQVNPYWAPELPVVLPVMSYQTHDAQVLDDHQASIKNMLIKLGGRFSDTTNSMYSPIDHISSTSSHQFYQNSGIDHMLACSPAANSNYAQLGPSPSPTMFHGVDHQSDLEAELSELIFGNSQPHQQYDGLGGFYQMDTMNNGSTGGTTSTSAESEISWGDISSLVYSTTTPMVSEYENSCQQGVRPSDSAFAESTYFGMK
Rmu_co8482105.1_g000001.1 /fd	RmRAX3b	ATGGGAAGAGCTCCATGCTGTGACAAATCTAAAGTGAAAAGAGGACCATGGTCTCCCGAAGAAGACGCCACCCTCAAGAACTACCTCCACGAACATGGCACCACTGGCAATTGGATTACTCTACCAACCAAAGCAGGCCTGAATCGTTGCGGTAAGAGTTGTCGTTTGAGATGGCTGAACTATCTTAGGCCAGACATCAAGCGTGGTACTTTCACGGAGATAGAAGACAATGTTATCTGCACTCTCTTTAGAAGCATTGGAAGCAGGCAAGTGAATGACTATGGCACTCATATATGGTGGTCTGTCATAGCTTCTCAACTGCCAGGACGAACAGATAATGATGTGAAAAACTATTGGAACACAAAGTTGAAGAAAAAGCTGCTGGCGGTTGCTGCAAGA…	MGRAPCCDKSKVKRGPWSPEEDATLKNYLHEHGTTGNWITLPTKAGLNRCGKSCRLRWLNYLRPDIKRGTFTEIEDNVICTLFRSIGSRQVNDYGTHIWWSVIASQLPGRTDNDVKNYWNTKLKKKLLAVAARNNIVAARRTCDHNIADQFSAPVPPKIETPHGPKTSSCLGGTLPYAANISLVHSFDQPKQTFEPWCNHSDSKPMEVSDFGSTSESNSFSIPLSHQEVSRLPSSSSLAQLDQYHCSLWSGHEGINYVNSEFLMDFGFETPSADQFLLGGFGH
Rmu_sc0003470.1_g000020.1 /pd	RmRS2Ha	ATGGATGTTGATCAGTACTTACTGAGAGGTTATACTTCATCTGTAACTCATGAGTTACCAAGCTGTGATCCAGAAGATGATCTGCGAAAAGGGCCATGGACAGTTGAGGAAGACTCCATTCTCATGGAGTATATCAACACTCACGGCGAGGGCCGGTGGAATTCACTGGCCGGAAACTCGGGCCTGAAACGAAGTGGCAAAAGCTGCAGACTGAGATGGTTGAACTACTTGCGCCCAAATGTTCGACGTGGAAATATCACCCTCCAAGAACAGCTTCTGATTCTTCAACTTCATTCTCGCTGGGGCAACAGGTGGTCGAAGATAGCGGAATACTTGCCGGGAAGAACAGACAATGAGATAAAAAACTACTGGAGAACAAGAGTCCAAAAGCAAGCAAAG…	MDVDQYLLRGYTSSVTHELPSCDPEDDLRKGPWTVEEDSILMEYINTHGEGRWNSLAGNSGLKRSGKSCRLRWLNYLRPNVRRGNITLQEQLLILQLHSRWGNRWSKIAEYLPGRTDNEIKNYWRTRVQKQAKQLNCDVNSKQFQDAMHDYCLTDHSNTAAAGSSHYWIDPNYLPEASATSSGSTELQDCLNIPEPTSTEFSELNCYPMNGQYYSSTNWSAQHPASPPHCPAPVRTPTACSHTHSVLAPSAHPPPSIAAATAHSARLPTTVAQPLERRWPDHS
Rmu_sc0000467.1_g000012.1 /fd	RmRS2Hb	ATGGAAGAAGATTTGATTCTGATAAACTATATTGCAAACCATGGTGAAGGTGTATGGAACTCCCTTGCCAAATCTGCCGGTTTGAAACGTACTGGGAAGAGTTGCAGACTCCGATGGCTAAACTATCTCCGACCGGACGTTAGGAGAGGCAATATCACACCAGAGGAACAGCTCTTGATCATGGAACTGCATGCCAAGTGGGGAAACAGGTGGTCGAAAATCGCAAAGCATCTGCCAGGACGGACCGACAATGAAATCAAGAACTACTGGAGAACCCGAATCCAAAAGCACATCAAGCAAGGTGATCAGAGCAATTCACAGGGACAAAGCTCAGAAGGGACTGCAGATCAGGCAAGCACGAGCCAAATGGGATCGAGCAGCACTACTGGTCTCGACCCA…	MEEDLILINYIANHGEGVWNSLAKSAGLKRTGKSCRLRWLNYLRPDVRRGNITPEEQLLIMELHAKWGNRWSKIAKHLPGRTDNEIKNYWRTRIQKHIKQGDQSNSQGQSSEGTADQASTSQMGSSSTTGLDPMETTYPLCPTTASYPVTLVQPPDHPNVVPPPDSNQESYWSMEDLWSMQLLNE
Rmu_sc0000501.1_g000017.1 /pd	RmRS2Hc	ATGGATGTTGATCAGTACTTACTGAGAGGTTATACTTCATCTGTAACTCATGAGTTACCAAGCTGTGATCCAGAAGATGATCTGCGAAAAGGGCCATGGACAGTTGAGGAAGACTCCATTCTCATGGAGTATATCAACACTCACGGCGAGGGCCGGTGGAATTCACTGGCCGGAAACTCGGGCCTGAAACGAAGCGGCAAAAGCTGCAGACTGAGATGGTTGAACTACTTGCGCCCAAATGTTCGACGTGGAAATATCACCCTCCAAGAACAGCTTCTGATTCTTCAACTTCATTCTCGCTGGGGCAACAGGTGGTCGAAGATAGCGGAATACTTGCCGGGAAGAACAGACAATGAGATAAAAAACTACTGGAGAACAAGAGTCCAAAAGCAAGCAAAG…	MDVDQYLLRGYTSSVTHELPSCDPEDDLRKGPWTVEEDSILMEYINTHGEGRWNSLAGNSGLKRSGKSCRLRWLNYLRPNVRRGNITLQEQLLILQLHSRWGNRWSKIAEYLPGRTDNEIKNYWRTRVQKQAKQLNCDVNSKQFQDAMRYVWIPRLMERIRASSDSTVLSGQPTETTTSPAFTPPDDYCLTNHSNTAAAGSSHYWIDPNYLPEASATSSGSTELQDCLNIPEPTSTEFSELNCYPMNGQYYSSTNWSGCYQDGSEIQGSEQIESSNSWSTPGGDLVENLWNEENIWFLQQQLNSD
Rmu_sc0004404.1_g000011.1 /pd	RmSMH4a	ATGGCCTTGATTAGCAATTGCATCGGCAACAAAGTTGGCATATCGAAGAATGTGGCTGAATCAGATGTTGTCAAAATTGGCCGCAAGATTGTTGATATCTCTTACCAAGGGCGTTACTGGACAACTGAAGACGATAAGAAACTGAAATATGCAGTGAAGAAAGTTGCTGCTCGTAAGGGAGGACACATCAAAGATTGGGAGAAAGTGGGTTTCATAGTCGGAAAAAGGGGAGAAAGGCGTTACTGGACAACTGAAGACGATAAGAAACTGAAATATGCAGTGAAGAAAGTTGCTGCTCGTAAGGGAGGACACATCAAAGATTGGAAGAAAGTGGCTTTCATAGTCGGAAAAAGGGGAGACCTCTGCAAAGACAGATGGCAGAATGTGGTTTCTCCAGAT…	MALISNCIGNKVGISKNVAESDVVKIGRKIVDISYQGRYWTTEDDKKLKYAVKKVAARKGGHIKDWEKVGFIVGKRGERRYWTTEDDKKLKYAVKKVAARKGGHIKDWKKVAFIVGKRGDLCKDRWQNVVSPDIKKGAWSKEEDQRLLNASASCGSNMLNTMLDVFNSSSVDGKIRTLHQCQARLQQLLNGNHSRKLEEKSVEQGNIAGLYQQKAEGVGDEGVADEGVVDEGVAYAQVADALTLLQNNYNGEEELEIGDGLTNLFKTYAEADAASGIAVHNECKLKFLELKTKRTYRSIVFKIEEKQKQVIVEATGDPTETYEAFTDSLPTDECCYAVFDFDLPIPEGVPKRQILFIAWLPDTSREENKKIYASALDSFKRELDGIQIELEATGPSEIG…
Rmu_sc0013358.1_g000003.1 /d	RmSMH4b	ATGAGGGAGTTGATTCGAAAGCAATACAAGAGCTGGACATCGAAGGAGGAAGAAGCCCTAGCAGCCGGGGTGCATAAGTACGGGAGCGGCAACTGGAAAACCATCCTCAAATATTCCAAATTTGCTCGTTACCTCGCTCGGAAGTCATGCGGTGACCTGTGGAAGAAATGGAGGACAATGGCATTTAGGGTTTCCAATGAGAAACTGAAGACCATGTCTCCCAAGGTAAAGAAGGTTGTGGCTGCCCGCCTGGAGGCCATTAATGATGGGAAAAACTCTGCTTTTGCTGAAAGAAAAGAGAGGGGTATAACGGGAAGCGGTTGGACGGTGGAGGAGGAAGAAGCCCTAGCCGCCGGGGTGGAAAAGTATGGGACGAACAAGTGGAAGCACATTCTCGAA…	MRELIRKQYKSWTSKEEEALAAGVHKYGSGNWKTILKYSKFARYLARKSCGDLWKKWRTMAFRVSNEKLKTMSPKVKKVVAARLEAINDGKNSAFAERKERGITGSGWTVEEEEALAAGVEKYGTNKWKHILEDPEFSPVLAIHPCTSLANKWRNLTDSVSEEKLRRMSCKVRKVMDASLRQKINDDQGEETERVSKMEEDTEESTMSTKVRKVVDDEVQNSANPNEAVKETERVPDHEMVEEDETLMMDVESSADRAEAVKENERILKMKEDAKSMLLLAKEIWGHCSTEDTNRVSAPACPQAVKESKRISEIAELDIDRFSAAPPPQAEKKTKIFSEMEVDTDRGPAPAPPKAVEETKRISDTAEDTKSMLLFMNQIYERFTQ
Rmu_sc0004404.1_g000004.1 /pd	RmSMH4c	ATGTCATATGCAAAGAAGTTGATCGAAATGGGGGCAGGGCGTTACTGGACAACTGAAGACGATAAGAAACTGAAATATGCAGTGAAGAAAGTTGCTGCTCGTAAGGGAGGACACATCAAAGATTGGAAGAAAGTGGCTTTCATAGTCGGAAAAAGGGGAGACCTCTGCAAAGACAGATGGCAGAATGTGGTTTCTCCAGATATAAAGAAAGGAGCTTGGAGCAAGGAGGAGGATCAAAGGCTCCTCAATGCCTCTGCTTCTTGTGATTCAAACATGTTGAATACTGTGCTTGATGTCTTCAATTCTTCTTCTGTGGATGGAAAGATCAGAACACTCCATCAATGCCAGGCTCGACTACAACAACTTTTGAATGGAAACCATTCCCGGAAGCTTGAAGAA…	MSYAKKLIEMGAGRYWTTEDDKKLKYAVKKVAARKGGHIKDWKKVAFIVGKRGDLCKDRWQNVVSPDIKKGAWSKEEDQRLLNASASCDSNMLNTVLDVFNSSSVDGKIRTLHQCQARLQQLLNGNHSRKLEEKSVEQGNIAGLYQQKAEGVGDEGVADEGVVDEGVAYAQVADALTLLQNNYNGEEELEIGDGLTNLFKTYAEADAASGIAVHNECKLKFLELKTKRTYRSIVFKIEEKQKQVIVEATGDPTETYEAFTDSLPTDECCYAVFDFDLPIPEGVPKRQILFIAWLPDTSREENKKIYASALDSFKRELDGIQIELEATGPSEIGLDVIRNRAAKHEP
Rmu_sc0001753.1_g000003.1 /pd	RmSRM1	ATGACTGTGGACGAAGCGGTTGCTAGCGCCTTGTGGACTTGGGAGCAGGATAAGGCATTTGAGAATGCCCTGGCAACTTATCCTGAGGATGCTCCAGATCGTTGGGACAAAATTGCAGCTGATGTAGAAGGGAAAAACCTAGAGGAGATAAAGCATCATTATGAACTCTTACTTGATGATATAAGCCAGATCGAAGCTGGTTGTATTCCACTGCCTTGCTACAATTCTTCTTCCGAGGGTTCAACAAGTCATGCCAGTGATGAAGGAACCAGTAAGAAGGGACACTACAGCAGCGAATCTAATCATGGAAGTAAGGCTTCAAGGGCAGATCAGGAACGCCGTAAGGGGATTGCTTGGACAGAGGATGAACACAGGCAATTTCTTCTAGGATTGGAAAAA…	MTVDEAVASALWTWEQDKAFENALATYPEDAPDRWDKIAADVEGKNLEEIKHHYELLLDDISQIEAGCIPLPCYNSSSEGSTSHASDEGTSKKGHYSSESNHGSKASRADQERRKGIAWTEDEHRQFLLGLEKYGKGDWRSISRNFVVTRTPTQVASHAQKYFIRLNSMNKDRRRSSIHDITSVNNGEIAAIQGPITGQGNGSAVGPSGSAKSTKQSAAGPPGVGMYGAPSIGQPIGGPLVSAVGTPVNLAGHSPHMAYGVRAPMPPGALVPGAPMNMPPMTYPMPHTAHSSSVWSVSEIVEAVNGRILKWGPVLLEPFLQTPEPSNPNQCFFAISGQNLDAHDCNYPEIKAARTGTLKPRLILWSDSLAVWERPYMIALVYESHGIGMTELGSLIGIP…
Rmu_sc0002888.1_g000040.1 /fd	RmTT2	ATGGTGCCATTAAGCACTAGAAGTTACAAGAACAAGGAAATAAACAGAGGGTCTTGGACAGCAGAAGAAGATCAGAGACTGGCTCAAGTAATTGAAGTCCATGGCCCAAGAAAGTGGAAGTCTGTTGCAACCAAAGCAGGTCTAAGCCGATGTGGGAAGAGTTGCAGACTGAGATGGATGAACTATCTTAGACCAAATATTAAGAGAGGCAATATATCAGACCAAGAAGAGGACTTGATACTCAGGCTTCATAAACTCCTTGGAAACAGGTGGTCATTGATTGCCGGAAGACTGCCTGGTCGAACAGACAACGAGATTAAGAATTACTGGAACTCTCATTTGAGCAAGAAGATCAAGCATAACGAGAGATCACAAAAACAAAACAGACTACTTTGTGCA…	MVPLSTRSYKNKEINRGSWTAEEDQRLAQVIEVHGPRKWKSVATKAGLSRCGKSCRLRWMNYLRPNIKRGNISDQEEDLILRLHKLLGNRWSLIAGRLPGRTDNEIKNYWNSHLSKKIKHNERSQKQNRLLCASSNPAAQELSSSSEPQNVELMENNAVPIGMEDDSSKREENYFFKSMSFNGSSGDELLFDGSTADEGPLNLEWMNRFLEMDESWFTLHDI
Rmu_sc0007525.1_g000007.1 /fd	RmWERa	ATGGGGGAAAGCAGTACGTGCTATGATAAGAACGAGGGACCGAAGAAAGGAGTCTGGGCTGCAAGTGAAGACCAGATTGTCAAAGACTACGTCAAAAAACATGGTGTGGGAAAATGGGGCAAATTATCTAGGGAAACAGGTCTGAAGAGATGTGGGAAGAGTGTGAGGCTTAGGTGGCTGAATTATCTGAGGCCTGGTATCGTTAGAGGCAACATTACAGAAGATGAAGAAGAGCTCATCATCAGACTGCACAAACTCTTGGGCAACAGGATACCAGGGCGAACTGATAATGAAATAAAAAACTACTGGAATTCCCGCTTAAAGAGGAAGCTACAACAACAAAACCACTTGGAAGTGCCGGAAGTGCCTAGAAATAAGGAGATCAGGGAGGACTTGTCA…	MGESSTCYDKNEGPKKGVWAASEDQIVKDYVKKHGVGKWGKLSRETGLKRCGKSVRLRWLNYLRPGIVRGNITEDEEELIIRLHKLLGNRIPGRTDNEIKNYWNSRLKRKLQQQNHLEVPEVPRNKEIREDLSSSAAVAAAAEKNPHLTGNNVNEDEDYHQHHDVDFGVGIEFEATDNNNGTGDDEHLRDDLWWNNFIMDLNDIQLDASEFQPDFPEIRLGNLR
Rmu_sc0030932.1_g000007.1 /pd	RmWERb	ATGGGAAGAAACTCAGGTTTCGAAAAGGAGGGATTGAAGAAAGGTATGTGGTCTGCTCGCGAAGACCAGGTTCTCAAGAACTATGTGAAAAAGCACGGTCCAGGCAACTGGGGAAAAACAGCAAGGGAGACTGGTCTGAAGAGATGTGGGAAGAGTGTGAGACTGAGATGGTTAAATTATCTGAGGCCCGGTATCAAGAAAGGCAACATTACAGAAGATGAAGAAGACCTTATTATCAGGATGCACAAACTCGTAGGCAACAGGTGGTCATTGATAGCAGGAAGGATTCCGGACCGAACAGACAACGAAATAAAAAACTACTGGAACTCCACTCTAAGGAAGAAGCTGGCAGAGGAAAAAGAAACGGAATCAGAAGTGTCGAGAAACGAGATGATCAAG…	MGRNSGFEKEGLKKGMWSAREDQVLKNYVKKHGPGNWGKTARETGLKRCGKSVRLRWLNYLRPGIKKGNITEDEEDLIIRMHKLVGNRWSLIAGRIPDRTDNEIKNYWNSTLRKKLAEEKETESEVSRNEMIKENLPSPVEDYGHQHLTKCDVVLGGGGGLMCFASNVNAEEDHQRRCLGGTSTDTTILSPRVGVGVGTGGGANNNIEPTGDDLNYNAMTWNDSIMDVNGGQLYMSEFLQTDFSKFWEETDRFMNFEVGGCSTFNHELPNNWDG
Rmu_sc0000103.1_g000015.1 /fd	RmWERc	ATGAGGAGAAGCAGCACTTACTATGATAAGAATGATGGACTGAAGAAAGGAGCCTGGGCTGCAAGTGAAGACCAGATTGTCAAAGACTACGTCAAAAAACACGGCATCGGAAAATGGGGCAAACTAACTAGGGAAACAGGTCTGAAGAGATGTGGGAAGAGTGTGAGACTTAGGTGGATGAACTATCTGAGGCCTGATATCATCAGAGGCTACATTAAAGAAGATGAAGAAGAGCTCATCATCAGGCTCCACAAACTCCTGGGAAACAGATGGTCATTGATAGCTGGAAGGATACCAGGGCGAACTGACAATGAAATCAAAAACTACTGGAATTCCACCTTAAAGAGGAAGCTGGAACAAGAAAATCACTTAGAAGTGTTTAAAGATGAGGAGATCAAG…	MRRSSTYYDKNDGLKKGAWAASEDQIVKDYVKKHGIGKWGKLTRETGLKRCGKSVRLRWMNYLRPDIIRGYIKEDEEELIIRLHKLLGNRWSLIAGRIPGRTDNEIKNYWNSTLKRKLEQENHLEVFKDEEIKEDLPSSVAAADEENPRLTKNNVVEDEDHHRQHYDVDVGVGVGVEATNNNGIGDDEYLRDDLWWNNFIVDFNDTQLDVSDFQTDFP
Rmu_sc0002888.1_g000015.1 /fd	RmWERd	ATGGGGAGGAGTCCATGCTGCTCCAAGGAAGGACTTAACAGAGGAGCTTGGACTGCCTTGGAAGATAAAGTACTAACGTCTTACATCAAAGCCCATGGAGAAGGCAAATGGAGAAACCTCCCAAAGAGAGCTGGTTTGAAGAGATGTGGTAAGAGCTGTAGACTGAGATGGTTAAACTATCTGAGGCCAGACATAAAGAGAGGTAATATATCCGGGGATGAAGAAGAACTCATTATCAGACTCCATAATCTTCTTGGCAACAGATGGTCTCTAATAGCTGGAAGGCTACCGGGGCGAACAGACAATGAAATCAAAAATTACTGGAACACCACTCTGGTGAAGAAAGCTAAACCCGAATCGCATTCGGGATCATCCAAGGAAACATCTCCCGCTCCGACC…	MGRSPCCSKEGLNRGAWTALEDKVLTSYIKAHGEGKWRNLPKRAGLKRCGKSCRLRWLNYLRPDIKRGNISGDEEELIIRLHNLLGNRWSLIAGRLPGRTDNEIKNYWNTTLVKKAKPESHSGSSKETSPAPTKFRPRTPSATATQPQVIRTKATRLTRMLVPSLPLLIDDYSTTTSPLDLRVPQTQSVSSLPEDAANTEVHIQGTDAMNFGCNGFQATAGEEEDAMGSYDIPLDDGMLNDWTGNDNCDLEKYGASLDLDSLAFLLDSDDWLGQENGI
Rmu_sc0002506.1_g000040.1 /fd	RmWERe	ATGGAGGACAGAATTCTTAGAGAGTATATAACAACTCATGGTGAAGGCAAATGGAGAAACCTTCCCAAAAGAGCAGGGCTTAAGAGATGTGGAAAGAGTTGCAGATTACGATGGTTGAACTATCTAAGACCTGATATCAAGAGAGGAAACATCACTCGGGATGAAGAAGAGCTCATTATCCGGCTTCATAAGCTCTTGGGAAACAGATGGTCTTTGATAGCGGGAAGGCTTCCTGGCCGAACAGACAATGAAATCAAGAATTACTGGAACACAAATATTGGGAAGAAAGTTCAAGATCACTCATCCACTAATTCTGAAGCCAATATTACTCACCGCAAACCACCAAATCATCAAACCCAGCAAAAGAACACAAACGTCGTCCGTACCAAGGCATCAAGG…	MEDRILREYITTHGEGKWRNLPKRAGLKRCGKSCRLRWLNYLRPDIKRGNITRDEEELIIRLHKLLGNRWSLIAGRLPGRTDNEIKNYWNTNIGKKVQDHSSTNSEANITHRKPPNHQTQQKNTNVVRTKASRCTKVFIPHLSQMDEENNPTVQQVAAPFLNHDYYDQVNNNDDPPLGMMGTGTDHQPADDLPPFLNLEIDDENSNSCGFMVDFKMDESFLSEFLNVDFSQLYSSTSTANGGDGVKAAISTSCGDDNHHKLHGPDFQSSMAPILDSELDWLS
Rmu_sc0002888.1_g000020.1 /fd	RmWERf	ATGGGGAGAAGACCTTGCTGTACTAAGGAGGGAGTGAACAAGGGACCTTGGACAGCTGAAGAAGACAAGATGCTTGCGGATCATATCAAAGCTCATGGCGAACAAAAATGGAGCAGCATTCCTAAACAAACAGGGCTCAAGAGATGTGGGAAGAGTTGCAGGCTTCGGTGGTTGAATTATCTAAGACCGAATATAAAACGAGGCAACATTACGCAAGAGGAAGAGGACCTCATCATTAGGCTCCATAAACTCTTAGGAAACAGATGGTCTCTAATAGCAGGAAGAATTCCGGGGCGAACAGACAATGAAATCAAGAACTACTGGAACGGCCACTTGTGCAAGAAATCACAGCTGGAAAAGTCTAAGGTTGCAGCAAAGAATATGAGACCCTCCGACGAG…	MGRRPCCTKEGVNKGPWTAEEDKMLADHIKAHGEQKWSSIPKQTGLKRCGKSCRLRWLNYLRPNIKRGNITQEEEDLIIRLHKLLGNRWSLIAGRIPGRTDNEIKNYWNGHLCKKSQLEKSKVAAKNMRPSDEVKVEEDHRHDSKVESESSEGSLFSHSSTTATTTEEDSSDILMGFYTREITLSEFLDTDFTKFSSMISTDKVLMVQGEGEVQIQKQPQVSSSQAEAEANDEAPMNVIISPEMMDNLIVWEDQTDSDFGFQLSAAFTDSVADEERILDFMN
Rmu_sc0014006.1_g000003.1 /fd	RmWERg	ATGGCTCCAAAGAACGACGGATCCACAAAAAAGGTTATGAACAAAGGAGCCTGGACTGCAGAAGAAGATAGAAAACTTGCAGAGTACATTGAAATCCATGGTGCCAAGAGGTGGAAGACTGTGGCTTCCATAGCAGGTTTGAATCGATGTGGAAAGAGTTGCAGACTGAGATGGTTGAACTACCTGAGACCGAATATCAAGAGAGGAAACATATCTGGTGATGAAGAGGACTTGATACTTCGTCTTCATAAGCTACTTGGAAACAGGTGGTCGTTGATTGCGGGGAGACTCCCAGGCCGAACAGACAATGAAATAAAGAACTACTGGAATTCACATTTGAGCAAGAAAATAAAGCAGAAGAATGAGAAAGCTACATTGGCTTCGGCAGCGCAAGAGATT…	MAPKNDGSTKKVMNKGAWTAEEDRKLAEYIEIHGAKRWKTVASIAGLNRCGKSCRLRWLNYLRPNIKRGNISGDEEDLILRLHKLLGNRWSLIAGRLPGRTDNEIKNYWNSHLSKKIKQKNEKATLASAAQEISTTSTTTTTPPQKALNETSSVPADKDEEEQVKLGTSSDGIFDVNEFFDFSTEGSYGLEWVNKFLELDEDPMAAAYRENNKALPKESQSQHKSKCP
