# Supplementary material for: An R2R3-MYB Transcription Factor RmMYB108 Responds to Chilling Stress of Rosa multiflora and Conferred Cold Tolerance of Arabidopsis
Source: Front Plant Sci. 2021 Jul 27;12:696919. doi: 10.3389/fpls.2021.696919 (PMC8353178; doi:10.3389/fpls.2021.696919)
Supplement: Supplementary Table 5 — The nucleotide and encoded amino acid sequences of R2R3-MYBs in Arabidopsis thaliana from The Arabidopsis Information Resource (TAIR). [file Table_5.XLSX]

## Sheet: Sheet1
A.thaliana_ID	AGI	Nucleotide sequence	Amino acid sequence
AtMYB62	AT1G68320	ACGAGTCTATAAATTCCCAAGAACCTGTTGAATCACTTTCACTTCTCAAAGCACCTAAAAGTCTATCTCTCTCTCTCTGTATACAGTCATGCATGCATAGAGCTTAAAAGATACGAAAACACCACAAACCAAATATCATTAAGTAATTAGGAAACTTAAACTAAGTATGGAAAATTCGATGAAGAAGAAGAAGAGCTTCAAAGAAAGTGAAGATGAAGAACTAAGAAGAGGGCCTTGGACTTTGGAGGAAGACACACTTCTCACAAATTACATCCTCCATAACGGTGAGGGTCGTTGGAATCACGTCGCCAAATGTGCTGGGCTAAAGAGAACTGGGAAAAGTTGTAGATTGAGATGGTTGAATTACTTGAAACCCGACATAAGACGAGGGAATCTTAC…	MENSMKKKKSFKESEDEELRRGPWTLEEDTLLTNYILHNGEGRWNHVAKCAGLKRTGKSCRLRWLNYLKPDIRRGNLTPQEQLLILELHSKWGNRWSKIAQYLPGRTDNEIKNYWRTRVQKQARQLNIESNSDKFFDAVRSFWVPRLIEKMEQNSSTTTTYCCPQNNNNNSLLLPSQSHDSLSMQKDIDYSGFSNIDGSSSTSTCMSHLTTVPHFMDQSNTNIIDGSMCFHEGNVQEFGGYVPGMEDYMVNSDISMECHVADGYSAYEDVTQDPMWNVDDIWQFRE
AtMYB100	AT2G25230	ATGAAAAAAAATTATCAAAAGAAGAATATAAAGGTGGTGAGCACAAGCAAATATTTGAAGAAAAGTGACATCGACAAAGTAAACTGGACAGAATCTGAGGACATAAAATTGAAAGAGATAATGGCGCTTGGACCCAAAAACAAATGGACAAAGGTCGCAAAAAAATTCGAAGGAAGAACAGGAAAACAATGCAGAGAGAGGTGGTATAACCATGCTCGTCCTAACATTAAGAAAACTGCTTGGAGTGAAGAAGAAGATCAAATTTTGATTGAAGCACACAAAGTACTTGGTACCAAATGGGTCGAGATCGCACAGCAACTTCCGGGGAGGAGCGATAACAATATTAAGAACCATTGGAACACCACAAAGCGTCGGGTGCAAAATAAAAGAGGTGGAACT…	MKKNYQKKNIKVVSTSKYLKKSDIDKVNWTESEDIKLKEIMALGPKNKWTKVAKKFEGRTGKQCRERWYNHARPNIKKTAWSEEEDQILIEAHKVLGTKWVEIAQQLPGRSDNNIKNHWNTTKRRVQNKRGGTVNPVGNNILENYIRCITINNEDFLKTDGSYGEPTNIESDDDSKDMLYGEMNLSLETITTQTTKPLTNASTTSPYVQMPEDNYTMEDCESLEDILELLRWWE
AtMYB48	AT3G46130	ATGAAAATGATGCAAGAGGAGGGAAACCGAAAAGGTCCATGGACAGAACAGGAAGACATACTTCTGGTAAATTTTGTTCACTTATTTGGAGATCGACGATGGGATTTTATAGCAAAAGTATCAGGTTTGAACAGAACAGGAAAGAGTTGCAGGCTAAGATGGGTTAATTACCTACATCCTGGTCTCAAACGTGGCAAGATGACGCCTCAAGAAGAGCGCCTCGTCCTTGAGCTTCACGCTAAGTGGGGAAACAGGTGGTCGAAAATAGCCCGAAAATTGCCGGGACGAACGGATAACGAGATAAAGAACTACTGGAGGACTCATATGAGGAAGAAAGCTCAAGAAAAGAAGCGTCCTGTTTCCCCAACTTCCTCATTTTCCAACTGCAGCTCGTCATCT…	MKMMQEEGNRKGPWTEQEDILLVNFVHLFGDRRWDFIAKVSGLNRTGKSCRLRWVNYLHPGLKRGKMTPQEERLVLELHAKWGNRWSKIARKLPGRTDNEIKNYWRTHMRKKAQEKKRPVSPTSSFSNCSSSSVTTTTTNTQDTSCHSRKSSGEVSFYDTGGSRSTREMNQENEDVYSLDDIWREIDHSAVNIIKPVKDIYSEQSHCLSYPNLASPSWESSLDSIWNMDADKSKISSYFANDQFPFCFQHSRSPWSSG
AtMYB59	AT5G59780	ATGAAACTTGTGCAAGAAGAATACCGTAAAGGACCGTGGACAGAACAGGAGGACATCCTCTTGGTCAACTTTGTCCACTTGTTCGGAGATCGAAGATGGGATTTTGTAGCGAAAGTTTCAGGTTTAAACAGAACAGGAAAGAGTTGCAGGTTAAGGTGGGTTAATTACCTGCATCCTGGTCTCAAACGTGGTAAGATGACTCCACAAGAAGAGCGTTTAGTCCTTGAGCTTCACGCCAAATGGGGAAACAGGTGGTCAAAAATTGCCCGGAAATTACCGGGGAGAACAGATAATGAGATAAAGAACTACTGGAGGACTCATATGAGGAAGAAGGCTCAAGAGAAGAAGCGACCTATGTCTCCTACTTCCTCATCTTCAAACTGTTGCTCATCATCTATG…	MTPQEERLVLELHAKWGNRWSKIARKLPGRTDNEIKNYWRTHMRKKAQEKKRPMSPTSSSSNCCSSSMTTTTSQDTGGSNGKMNQECEDGYYSMDDIWREIDQSGANVIKPVKDNYYSEQSCYLNFPPLASPTWESSLESIWNMDADESKMSSFAIDQFPLSFEHGSGRL
AtMYB91	AT2G37630	ATGAAAGAGAGACAACGTTGGAGTGGTGAAGAAGATGCATTGTTACGTGCTTACGTTAGACAGTTCGGTCCGAGAGAATGGCATCTTGTGTCTGAGCGTATGAACAAACCTTTGAACCGTGACGCCAAGTCTTGTTTAGAGAGATGGAAGAATTATCTTAAGCCAGGGATCAAGAAAGGGTCTTTGACAGAGGAAGAGCAGAGGCTTGTGATCCGTCTTCAGGAGAAACACGGCAACAAGTGGAAGAAGATTGCTGCTGAGGTTCCCGGGAGGACGGCAAAGCGGTTAGGGAAGTGGTGGGAAGTGTTTAAGGAGAAGCAACAGAGAGAAGAGAAAGAGAGTAACAAGAGAGTTGAGCCTATTGACGAGAGTAAGTACGATCGGATTCTCGAGAGTTTC…	MKERQRWSGEEDALLRAYVRQFGPREWHLVSERMNKPLNRDAKSCLERWKNYLKPGIKKGSLTEEEQRLVIRLQEKHGNKWKKIAAEVPGRTAKRLGKWWEVFKEKQQREEKESNKRVEPIDESKYDRILESFAEKLVKERSNVVPAAAAAATVVMANSNGGFLHSEQQVQPPNPVIPPWLATSNNGNNVVARPPSVTLTLSPSTVAAAAPQPPIPWLQQQQPERAENGPGGLVLGSMMPSCSGSSESVFLSELVECCRELEEGHRAWADHKKEAAWRLRRLELQLESEKTCRQREKMEEIEAKMKALREEQKNAMEKIEGEYREQLVGLRRDAEAKDQKLADQWTSRHIRLTKFLEQQMGCRLDRP
AtDHL1	AT2G38090	ATGAACAGAGGAATCGAAGTTATGTCACCAGCAACATATCTAGAGACATCAAACTGGTTGTTTCAAGAAAACAGAGGAACCAAATGGACAGCTGAAGAAAACAAGAAATTCGAAAACGCTTTAGCCTTTTACGACAAAGATACTCCCGACAGATGGTCCAGAGTCGCTGCCATGCTTCCCGGTAAAACAGTCGGAGATGTGATCAAACAATACAGAGAGCTTGAGGAAGACGTTAGCGACATCGAAGCTGGTCTTATACCAATCCCTGGTTACGCCTCTGATTCATTCACACTTGATTGGGGTGGCTACGACGGAGCAAGCGGTAACAATGGGTTTAACATGAACGGTTACTACTTTTCCGCCGCCGGAGGAAAGAGAGGATCCGCCGCACGAACGGCG…	MNRGIEVMSPATYLETSNWLFQENRGTKWTAEENKKFENALAFYDKDTPDRWSRVAAMLPGKTVGDVIKQYRELEEDVSDIEAGLIPIPGYASDSFTLDWGGYDGASGNNGFNMNGYYFSAAGGKRGSAARTAEHERKKGVPWTEEEHRQFLMGLKKYGKGDWRNIARNFVTTRTPTQVASHAQKYFIRQVNGGKDKRRSSIHDITTVNIPDSPDAAAADNATANAPCSPPSVGGNQRETSEWEGQTLYDETAAAFYNQNAFSETLLGMSSTPYMAKLQEQSFLNASQFESYNAYLQM
AtMYB25	AT2G39880	ATGAACGGAGAAATCTCTCGTCCGCCGGAGCTAATATCGTCCCGGAATCCTTGCAAGAGTTTTGAAAATGCAATACACAAAGCAGTTGAGGCAGAGCTCGCCGAGCTAGCGAAAAGCGACGCGAACGGCGGCGGAAAGAGTAAAGTGAAAGGACCTTGGTTGCCGGAGCAAGATGAGGCTCTCACGAGGCTTGTGAAAATGTGTGGGCCGAGGAACTGGAATCTAATCTCCCGTGGAATCCCAGGTCGCTCTGGTAAATCTTGCCGATTACGTTGGTGTAATCAGCTCGATCCTATCCTCAAACGAAAACCTTTCTCTGATGAGGAGGAGCATATGATAATGTCTGCACAGGCGGTTCTTGGGAACAAATGGTCTGTGATTGCTAAACTCTTACCTGGG…	MNGEISRPPELISSRNPCKSFENAIHKAVEAELAELAKSDANGGGKSKVKGPWLPEQDEALTRLVKMCGPRNWNLISRGIPGRSGKSCRLRWCNQLDPILKRKPFSDEEEHMIMSAQAVLGNKWSVIAKLLPGRTDNAIKNHWNSNLRRKPAEQWKIPLLMSNTEIVYQLYPSMVRRISNASPKEHLPQEEETGVLSDDKMDDEAKEPPREQNSKTGVYRPVARMGAFSVCKPGYMAPCEGPLVQASRPDSLAGKFLQSLCYDPIIPSKCGHGCCNHQDSTTLSSSSVLGSEFVDYEEHSSAELDKELISISNDLNNTAWIRSGKEAEQSLKADDQFRREYAHSKFSGMVNNGVSSQMVRQDLRALS
AtMYB110	AT3G29020	ATGAAGATGGATTTTTCATGTTTCCAAGAATACCCTTTTGAGTTTCATTGCAGAGGAACAACATTTAATGGGTTTAGAGAAAACAATGCAGTGTCTGAAACAGTAGAAGAGTTCTGTAATAAAAGAAGGATGCAGAAGAAGAGTGATGATTTGAAGACTAAGAAGAAGAAGAAACAGAGTGTTTCTAGGGTTTGTAGTAGAGGACATTGGAGGATCTCTGAAGATACTCAGCTTATGGAGCTTGTTTCGGTTTACGGTCCTCAAAACTGGAACCACATTGCAGAGAGTATGCAAGGAAGAACAGGAAAGAGCTGCAGATTGAGGTGGTTTAACCAGTTAGATCCGAGGATTAACAAGAGAGCTTTCAGTGATGAAGAAGAAGAGAGACTACTTGCTGCT…	MDFSCFQEYPFEFHCRGTTFNGFRENNAVSETVEEFCNKRRMQKKSDDLKTKKKKKQSVSRVCSRGHWRISEDTQLMELVSVYGPQNWNHIAESMQGRTGKSCRLRWFNQLDPRINKRAFSDEEEERLLAAHRAFGNKWAMIAKLFNGRTDNALKNHWHVLMARKMRQQSSSYVQRFNGSAHESNTDHKIFNLSPGLSLLTLHICIEFNSVIVMRYFRYLSLRNNELMVWSQK
AtMYB112	AT1G48000	ATGAATATAAGTAGAACAGAATTCGCAAACTGTAAAACCCTTATAAATCATAAAGAAGAAGTCGAAGAAGTCGAGAAAAAGATGGAAATAGAAATAAGGAGAGGTCCATGGACTGTGGAAGAAGACATGAAGCTCGTCAGTTACATTTCTCTTCACGGTGAAGGAAGATGGAACTCCCTCTCTCGTTCTGCTGGACTGAATAGAACGGGGAAAAGTTGCAGATTGCGGTGGCTAAATTATCTCCGGCCGGATATCCGCCGTGGAGACATATCCCTTCAAGAACAATTTATCATCCTTGAACTCCATTCTCGTTGGGGAAATCGGTGGTCAAAGATTGCTCAACATTTACCGGGAAGAACAGATAACGAGATAAAGAATTATTGGAGAACACGTGTTCAA…	MNISRTEFANCKTLINHKEEVEEVEKKMEIEIRRGPWTVEEDMKLVSYISLHGEGRWNSLSRSAGLNRTGKSCRLRWLNYLRPDIRRGDISLQEQFIILELHSRWGNRWSKIAQHLPGRTDNEIKNYWRTRVQKHAKLLKCDVNSKQFKDTIKHLWMPRLIERIAATQSVQFTSNHYSPENSSVATATSSTSSSEAVRSSFYGGDQVEFGTLDHMTNGGYWFNGGDTFETLCSFDELNKWLIQ
AtMYB56	AT5G17800	ATGAATCCAAATCTCCTTGAGAAAGATCTAAGAGGTAAGGAAACTACAAATGGGTCAATAAGATACAAAGAAGCAAACAACTTCAGATCTCTACCAAACTCACACACTGCTGCTTGTAAAACTTCACTCAACAACCCCTCTATCTCTAGAAACCATCCTCACAACAAATCAGCCTCAGTCTTGGAGTCGGAAGATGAACATGGGAACGAGAGAGGTGAAAACGAAAAGAGTTTAAGAATGAGGGGCAAAAGTGGAATTAACACAAAAGTATGCTCACGAGGACACTGGAGACCAACAGAAGATGCTAAACTCAAGGAGCTTGTTGCCCAGTTTGGTCCCCAAAACTGGAACTTGATTTCTAACCACCTTCTTGGTAGATCAGGCAAGAGTTGTAGATTG…	MNPNLLEKDLRGKETTNGSIRYKEANNFRSLPNSHTAACKTSLNNPSISRNHPHNKSASVLESEDEHGNERGENEKSLRMRGKSGINTKVCSRGHWRPTEDAKLKELVAQFGPQNWNLISNHLLGRSGKSCRLRWFNQLDPRINKRAFTEEEEFRLLAAHRAYGNKWALISRLFPGRTDNAVKNHWHVIMARRTRESQRQRQQPPPTLSRDAEMTVSSSCRYNQGKFINEEDDDDDVSAVSTCTTELSLTPPSSAYQPRFFNYDSTLASGKDGQCVQRAEVNGIYGKKMDHQNHHTISVSERKVEMKMRSGYYYFDFLGVGAS
AtHL1	AT5G23650	ATGAATTTAGGACAGGAAATTAGTGTCGGATCGTCTTGGAGCAAGGATGATGATATTGCTTTCGAGAAAGCCCTTGCAATTTATAACGATAAAACAGAGATTCGTTGGAAAAAAATTGCTACAGTTGTTCCGGGAAAAACTTTAGAACAAGTTATAGAGCATTACAACATTTTAGCTCGTGATGTTATGTTGATTGAATCTGGATGTGTACGTCTTCCAGATTATGATGATTTTTTAGAAGAACCAAATCACAATGCTTTTGGTAAAGAAAGAAGCATATTGGAAGGTGGCAACGATCGCAAATATGAGTCTAAACACAAAGGTAAATCAAAACTAAAGCAAAAACGACGAAGGGGTGTTCCTTGGAAGCCTTTTGAACACAGACAATTTCTGCATGGT…	MNLGQEISVGSSWSKDDDIAFEKALAIYNDKTEIRWKKIATVVPGKTLEQVIEHYNILARDVMLIESGCVRLPDYDDFLEEPNHNAFGKERSILEGGNDRKYESKHKGKSKLKQKRRRGVPWKPFEHRQFLHGLKKYGKGDWRSISRHCVVTRTSTQVASHAQKYFAHINSEDKKRKRPSIHDITIAENKSISTKQRPITWQKINNNGATASNTQANQTTLQPSLDIPIYGTHNNIWNAQATQVISQPSQNHPTYDAPIIWNTQVASQPSANIPMYGTSTISQPMVGPMLSPFGTNLNHLAPSHMTSGVQHDSVPYYSGPSAPINMDSIPYNIDLYN
AtMYB19	AT5G52260	ATGACCAAATCTGGAGAGAGACCAAAACAGAGACAGAGGAAAGGGTTATGGTCACCTGAAGAAGACCAGAAGCTCAAGAGTTTCATCCTCTCTCGTGGCCATGCTTGCTGGACCACTGTTCCCATCCTAGCTGGATTGCAAAGGAATGGGAAAAGCTGCAGATTAAGGTGGATTAATTACCTAAGACCAGGACTAAAGAGGGGGTCGTTTAGTGAAGAAGAAGAAGAGACCATCTTGACTTTACATTCTTCCTTGGGTAACAAGTGGTCTCGGATTGCAAAATATTTACCGGGAAGAACAGACAACGAGATTAAGAACTATTGGCATTCCTATCTGAAGAAGAGATGGCTCAAATCTCAACCACAACTCAAAAGCCAAATATCAGACCTCACAGAATCT…	MTKSGERPKQRQRKGLWSPEEDQKLKSFILSRGHACWTTVPILAGLQRNGKSCRLRWINYLRPGLKRGSFSEEEEETILTLHSSLGNKWSRIAKYLPGRTDNEIKNYWHSYLKKRWLKSQPQLKSQISDLTESPSSLLSCGKRNLETETLDHVISFQKFSENPTSSPSKESNNNMIMNNSNNLPKLFFSEWISSSNPHIDYSSAFTDSKHINETQDQINEEEVMMINNNNYSSLEDVMLRTDFLQPDHEYANYYSSGDFFINSDQNYV
AtMYBS2	AT5G08520	ATGACGGTGGAGGAAGTTAGTGATGGTTCTGTGTGGAGTAGGGAGGATGATATTGCCTTTGAGAGAGCTCTAGCCAATAATACCGATGAATCAGAGGAACGGTGGGAGAAGATTGCTGCAGACGTTCCAGGCAAAAGTGTTGAACAGATTAAAGAACATTACGAGCTTTTAGTTGAAGATGTTACTAGGATTGAATCAGGATGTGTGCCTCTTCCTGCCTATGGGTCTCCTGAAGGATCGAATGGCCATGCTGGTGATGAAGGAGCAAGTAGTAAGAAAGGAGGTAACAGTCATGCGGGAGAGTCTAACCAAGCAGGTAAATCAAAGTCCGATCAAGAACGACGAAAGGGTATCGCGTGGACAGAAGATGAGCACAGGTTATTTCTTCTTGGTTTGGAT…	MTVEEVSDGSVWSREDDIAFERALANNTDESEERWEKIAADVPGKSVEQIKEHYELLVEDVTRIESGCVPLPAYGSPEGSNGHAGDEGASSKKGGNSHAGESNQAGKSKSDQERRKGIAWTEDEHRLFLLGLDKYGKGDWRSISRNFVVTRTPTQVASHAQKYFIRLNSMNKDRRRSSIHDITSVGNADVSTPQGPITGQNNSNNNNNNNNNNSSPAVAGGGNKSAKQAVSQAPPGPPMYGTPAIGQPAVGTPVNLPAPPHMAYGVHAAPVPGSVVPGAAMNIGQMPYTMPRTPTAHR
AtMYB66	AT5G14750	ATGAGAAAGAAAGTAAGTAGTAGTGGTGACGAAGGAAACAATGAGTACAAGAAAGGTTTGTGGACAGTAGAAGAAGACAAAATCCTCATGGATTATGTCAAAGCTCATGGCAAAGGTCACTGGAATCGTATTGCCAAAAAGACTGGTTTAAAGAGATGTGGAAAGAGTTGTAGATTGAGGTGGATGAATTATCTCAGCCCTAATGTGAAAAGAGGCAATTTCACCGAGCAAGAAGAGGATCTTATCATTAGGCTCCACAAGTTGCTTGGTAATAGGTGGTCTTTAATTGCTAAAAGAGTGCCGGGTCGAACGGATAATCAAGTGAAGAACTATTGGAACACGCATCTTAGTAAGAAACTCGGAATCAAAGATCAGAAAACCAAACAGAGCAATGGTGAT…	MRKKVSSSGDEGNNEYKKGLWTVEEDKILMDYVKAHGKGHWNRIAKKTGLKRCGKSCRLRWMNYLSPNVKRGNFTEQEEDLIIRLHKLLGNRWSLIAKRVPGRTDNQVKNYWNTHLSKKLGIKDQKTKQSNGDIVYQINLPNPTETSEETKISNIVDNNNILGDEIQEDHQGSNYLSSLWVHEDEFELSTLTNMMDFIDGHCF
AtMYB0	AT3G27920	ATGAGAATAAGGAGAAGAGATGAAAAAGAGAATCAAGAATACAAGAAAGGTTTATGGACAGTTGAAGAAGACAACATCCTTATGGACTATGTTCTTAATCATGGCACTGGCCAATGGAACCGCATCGTCAGAAAAACTGGGCTAAAGAGATGTGGGAAAAGTTGTAGACTGAGATGGATGAATTATTTGAGCCCTAATGTGAACAAAGGCAATTTCACTGAACAAGAAGAAGACCTCATTATTCGTCTCCACAAGCTCCTCGGCAATAGATGGTCTTTGATAGCTAAAAGAGTACCGGGAAGAACAGATAACCAAGTCAAGAACTACTGGAACACTCATCTCAGCAAAAAACTCGTCGGAGATTACTCCTCCGCCGTCAAAACCACCGGAGAAGACGAC…	MRIRRRDEKENQEYKKGLWTVEEDNILMDYVLNHGTGQWNRIVRKTGLKRCGKSCRLRWMNYLSPNVNKGNFTEQEEDLIIRLHKLLGNRWSLIAKRVPGRTDNQVKNYWNTHLSKKLVGDYSSAVKTTGEDDDSPPSLFITAATPSSCHHQQENIYENIAKSFNGVVSASYEDKPKQELAQKDVLMATTNDPSHYYGNNALWVHDDDFELSSLVMMNFASGDVEYCL
AtMYB23	AT5G40330	ATGAGAATGACAAGAGATGGAAAAGAACATGAATACAAGAAAGGTTTATGGACAGTGGAAGAAGACAAGATCCTCATGGATTATGTCCGAACTCATGGCCAGGGCCACTGGAACCGCATCGCCAAGAAAACTGGGCTCAAGAGATGTGGGAAAAGCTGTAGGTTGAGATGGATGAACTACTTAAGCCCTAATGTTAACAGAGGCAATTTTACTGACCAAGAAGAAGATCTCATCATCAGACTCCACAAGCTCCTCGGCAACAGATGGTCGTTGATAGCGAAAAGAGTTCCGGGAAGAACAGACAACCAAGTAAAGAATTACTGGAACACACATCTCAGCAAGAAACTTGGTCTCGGAGATCATTCAACTGCCGTCAAAGCCGCATGCGGTGTAGAGTCT…	MRMTRDGKEHEYKKGLWTVEEDKILMDYVRTHGQGHWNRIAKKTGLKRCGKSCRLRWMNYLSPNVNRGNFTDQEEDLIIRLHKLLGNRWSLIAKRVPGRTDNQVKNYWNTHLSKKLGLGDHSTAVKAACGVESPPSMALITTTSSSHQEISGGKNSTLRFDTLVDESKLKPKSKLVHATPTDVEVAATVPNLFDTFWVLEDDFELSSLTMMDFTNGYCL
AtMYB67	AT3G12720	ATGAGAGAGAAGTGGGAAATGAAAAGAGATGAAATGGGACATCGATGTTGTGGAAAACACAAAGTGAAGAGAGGTCTTTGGTCTCCAGAGGAAGACGAGAAGCTTCTTCGTTATATCACCACTCATGGTCATCCTAGTTGGAGTTCCGTTCCAAAGCTTGCCGGGTTGCAGAGATGTGGGAAGAGTTGCAGATTAAGGTGGATAAACTATCTAAGGCCTGATCTGAGGAGAGGTTCGTTTAATGAGGAAGAAGAGCAGATTATCATCGACGTACATCGTATTCTTGGTAACAAATGGGCTCAGATTGCTAAGCACTTACCTGGACGCACTGATAATGAAGTCAAGAACTTTTGGAACTCATGCATTAAGAAGAAACTTCTTTCTCAAGGCTTAGATCCT…	MREKWEMKRDEMGHRCCGKHKVKRGLWSPEEDEKLLRYITTHGHPSWSSVPKLAGLQRCGKSCRLRWINYLRPDLRRGSFNEEEEQIIIDVHRILGNKWAQIAKHLPGRTDNEVKNFWNSCIKKKLLSQGLDPSTHNLMPSHKRSSSSNNNNIPKPNKTTSIMKNPTDLDQSTTAFSITNINPPTSTKPNKLKSPNQTTIPSQTVIPINDNMSSTQTMIPINDPMSSLLDDENMIPHWSDVDGMAIHEAPMLPSDKAVVGVDDDDLNMDILFNTPSSSAFDPDFASIFSSAMSIDFNPMDDLGSWTF
AtDUO1	AT3G60460	ATGAGGAAAATGGAAGCGAAGAAGGAAGAGATAAAGAAAGGTCCATGGAAAGCCGAAGAAGACGAAGTACTCATCAACCATGTCAAGAGATACGGTCCTCGTGATTGGAGCTCCATTCGATCCAAAGGTCTTCTTCAACGCACCGGCAAATCCTGTCGTCTTCGTTGGGTCAATAAACTCCGTCCCAATCTCAAAAATGGATGCAAGTTCTCGGCTGACGAAGAGAGGACTGTGATTGAGTTACAATCTGAGTTTGGTAACAAATGGGCGAGAATCGCTACGTATCTACCGGGAAGAACTGATAACGATGTGAAGAATTTCTGGAGTAGCAGACAAAAGAGACTCGCTAGGATTCTTCATAACTCCTCTGATGCATCGAGTTCGAGTTTCAATCCCAAA…	MRKMEAKKEEIKKGPWKAEEDEVLINHVKRYGPRDWSSIRSKGLLQRTGKSCRLRWVNKLRPNLKNGCKFSADEERTVIELQSEFGNKWARIATYLPGRTDNDVKNFWSSRQKRLARILHNSSDASSSSFNPKSSSSHRLKGKNVKPIRQSSQGFGLVEEEVTVSSSCSQMVPYSSDQVGDEVLRLPDLGVKLEHQPFAFGTDLVLAEYSDSQNDANQQAISPFSPESRELLARLDDPFYYDILGPADSSEPLFALPQPFFEPSPVPRRCRHVSKDEEADVFLDDFPADMFDQVDPIPSP
AtMYB65	AT3G11440	ATGAGTTACACGACGGCGACTGCTGATAGTGATGATGGTATGCACTCCAGCATCCATAATGAATCACCAGCTCCTGATAGTATTAGCAATGGCTGCAGAAGTAGAGGGAAAAGAAGTGTCCTGAAGAAAGGACCATGGACTTCAACTGAAGACGGGATTTTAATTGATTATGTAAAGAAGCACGGCGAGGGTAACTGGAATGCTGTGCAGAAACACACTAGCCTGGCCCGTTGTGGTAAAAGCTGTCGTCTGAGATGGGCTAATCATCTGAGGCCAAACTTGAAGAAAGGAGCATTTAGCCAAGAAGAAGAACAGCTCATTGTTGAAATGCACGCCAAGATGGGAAATAAATGGGCACAGATGGCTGAACATTTACCTGGTCGAACAGATAATGAGATA…	MSYTTATADSDDGMHSSIHNESPAPDSISNGCRSRGKRSVLKKGPWTSTEDGILIDYVKKHGEGNWNAVQKHTSLARCGKSCRLRWANHLRPNLKKGAFSQEEEQLIVEMHAKMGNKWAQMAEHLPGRTDNEIKNYWNTRIKRRQRAGLPLYPPEIYVDDLHWSEEYTKSNIIRVDRRRRHQDFLQLGNSKDNVLFDDLNFAASLLPAASDLSDLVACNMLGTGASSSRYESYMPPILPSPKQIWESGSRFPMCSSNIKHEFQSPEHFQNTAVQKNPRSCSISPCDVDHHPYENQHSSHMMMVPDSHTVTYGMHPTSKPLFGAVKLELPSFQYSETSAFDQWKTTPSPPHSDLLDSVDAYIQSPPPSQVEESDCFSSCDTGLLDMLLHEAKIKTSAKHS…
AtMYB33	AT5G06100	ATGAGTTACACGAGCACTGACAGTGACCATAATGAGTCACCAGCTGCTGATGATAATGGAAGTGACTGCAGAAGTAGATGGGATGGTCATGCTCTCAAGAAAGGCCCTTGGAGTTCAGCTGAAGATGATATTCTTATTGACTATGTGAATAAGCATGGTGAGGGTAACTGGAATGCTGTGCAGAAACACACCAGCTTGTTTCGTTGTGGTAAAAGCTGTCGTCTAAGATGGGCTAATCATCTGAGGCCAAATTTGAAGAAAGGAGCTTTTAGTCAAGAAGAAGAACAGCTTATCGTTGAATTGCATGCCAAGATGGGTAATAGATGGGCACGTATGGCTGCACATTTGCCTGGCCGAACGGATAATGAGATAAAGAATTATTGGAACACTCGTATCAAG…	MSYTSTDSDHNESPAADDNGSDCRSRWDGHALKKGPWSSAEDDILIDYVNKHGEGNWNAVQKHTSLFRCGKSCRLRWANHLRPNLKKGAFSQEEEQLIVELHAKMGNRWARMAAHLPGRTDNEIKNYWNTRIKRRQRAGLPLYPPEMHVEALEWSQEYAKSRVMGEDRRHQDFLQLGSCESNVFFDTLNFTDMVPGTFDLADMTAYKNMGNCASSPRYENFMTPTIPSSKRLWESELLYPGCSSTIKQEFSSPEQFRNTSPQTISKTCSFSVPCDVEHPLYGNRHSPVMIPDSHTPTDGIVPYSKPLYGAVKLELPSFQYSETTFDQWKKSSSPPHSDLLDPFDTYIQSPPPPTGGEESDLYSNFDTGLLDMLLLEAKIRNNSTKNNLYRSCASTIPSA…
AtMYB71	AT3G24310	ATGAGTTTGTGGGGAGGGATGGGAGGAGGATGGGGAATGGTAGAAGAAGGTTGGAGAAAAGGGCCTTGGACTGCTGAAGAAGACCGCCTTTTGATCGATTATGTGCAGCTTCACGGTGAAGGGCGATGGAACTCTGTTGCGAGGCTCGCGGGGTTGAAGAGAAATGGGAAAAGCTGCAGGTTAAGATGGGTTAACTACCTAAGACCAGACCTCAAGAGAGGACAAATCACTCCTCATGAAGAAACCATTATCCTTGAGTTACATGCTAAGTGGGGCAATAGGTGGTCCACGATTGCACGTAGTTTACCGGGAAGAACAGACAACGAAATCAAGAACTATTGGCGAACCCATTTCAAGAAGAAGACGAAGTCTCCAACTAACAGTGCGGAGAAGACAAAG…	MSLWGGMGGGWGMVEEGWRKGPWTAEEDRLLIDYVQLHGEGRWNSVARLAGLKRNGKSCRLRWVNYLRPDLKRGQITPHEETIILELHAKWGNRWSTIARSLPGRTDNEIKNYWRTHFKKKTKSPTNSAEKTKNRILKRQQFQQQRQMELQQEQQLLQFNQIDMKKIMSLLDDDNNNGDNTFSSSSSGESGALYVPHQITHSTTTSGCEPNSNGYYPVVPVTIPEANVNEDNAIWDGLWNLDFEGQGSFGGAACAPRKHYFQNMVIPFC
AtMYB120	AT5G55020	ATGATCATGTACGGAGGAGGAGGAGCAGGGAAGGACGGTGGATCCACCAATCACTTATCAGACGGAGGAGTGATATTGAAGAAAGGTCCATGGACGGCGGCGGAAGATGAGATACTTGCTGCGTACGTTAGAGAGAACGGTGAAGGGAATTGGAACGCCGTTCAGAAAAACACAGGTTTGGCTCGTTGCGGCAAAAGCTGCCGTCTTCGATGGGCCAATCACCTCCGACCAAATCTGAAAAAAGGCTCTTTCACCGGTGACGAAGAACGTCTCATCATTCAGCTTCATGCTCAGCTTGGTAACAAATGGGCTCGCATGGCTGCTCAGTTACCGGGAAGAACAGACAACGAGATTAAGAACTATTGGAACACGAGATTGAAACGACTTCTTCGCCAAGGA…	MIMYGGGGAGKDGGSTNHLSDGGVILKKGPWTAAEDEILAAYVRENGEGNWNAVQKNTGLARCGKSCRLRWANHLRPNLKKGSFTGDEERLIIQLHAQLGNKWARMAAQLPGRTDNEIKNYWNTRLKRLLRQGLPLYPPDIIPNHQLHPHPHHQQQQQHNHHHHHHQQQQQHQQMYFQPQSSQRNTPSSSPLPSPTPANAKSSSSFTFHTTTANLLHPLSPHTPNTPSQLSSTPPPPPLSSPLCSPRNNQYPTLPLFALPRSQINNNNNGNFTFPRPPPLLQPPSSLFAKRYNNANTPLNCINRVSTAPFSPVSRDSYTSFLTLPYPSPTAQTATYHNTNNPYSSSPSFSLNPSSSSYPTSTSSPSFLHSHYTPSSTSFHTNPVYSMKQEQLPSNQIPQ…
AtMYB97	AT4G26930	ATGATCGTGTACGGTGGGGGAGCATCCGAGGACGGTGAAGGTGGAGGGGTGGTTCTGAAGAAAGGGCCATGGACGGTGGCCGAGGACGAGACACTGGCGGCTTACGTACGGGAATACGGTGAAGGGAACTGGAATTCTGTTCAGAAGAAGACATGGCTGGCTAGGTGTGGCAAGAGCTGCCGCCTCCGCTGGGCTAACCACTTACGACCTAATCTCAGGAAAGGCTCCTTCACCCCCGAGGAAGAACGTCTCATCATACAACTCCACTCTCAGCTAGGCAACAAATGGGCTCGCATGGCTGCTCAGTTACCAGGCAGAACAGATAACGAGATCAAGAACTACTGGAACACGAGGTTGAAACGCTTCCAACGCCAAGGCCTCCCTCTCTACCCTCCAGAA…	MIVYGGGASEDGEGGGVVLKKGPWTVAEDETLAAYVREYGEGNWNSVQKKTWLARCGKSCRLRWANHLRPNLRKGSFTPEEERLIIQLHSQLGNKWARMAAQLPGRTDNEIKNYWNTRLKRFQRQGLPLYPPEYSQNNHQQQMYPQQPSSPLPSQTPASSFTFPLLQPPSLCPKRCYNTAFSPKASYISSPTNFLVSSPTFLHTHSSLSSYQSTNPVYSMKHELSSNQIPYSASLGVYQVSKFSDNGDCNQNLNTGLHTNTCQLLEDLMEEAEALADSFRAPKRRQIMAALEDNNNNNNFFSGGFGHRVSSNSLCSLQGLTPKEDESLQMNTMQDEDITKLLDWGSESEEISNGQSSVITTENNLVLDDHQFAFLFPVDDDTNNLPGIC
AtMYB83	AT3G08500	ATGATGATGAGGAAACCGGACATTACTACGATCAGAGACAAAGGCAAGCCAAATCATGCATGTGGTGGTAATAACAACAAACCGAAGCTAAGAAAAGGACTTTGGTCGCCTGATGAAGATGAGAAGCTGATAAGATACATGTTGACTAATGGACAAGGATGTTGGAGTGACATCGCTAGAAATGCTGGTCTTTTACGTTGTGGTAAAAGTTGTCGCCTTCGCTGGATCAATTACTTGAGGCCTGATCTTAAACGTGGATCCTTCTCTCCTCAGGAGGAGGATCTCATCTTCCATTTGCATTCCATTCTTGGTAACAGGTGGTCTCAAATAGCTACTCGGCTTCCAGGTAGAACAGACAACGAGATCAAAAACTTTTGGAACTCGACATTGAAGAAGCGG…	MMMRKPDITTIRDKGKPNHACGGNNNKPKLRKGLWSPDEDEKLIRYMLTNGQGCWSDIARNAGLLRCGKSCRLRWINYLRPDLKRGSFSPQEEDLIFHLHSILGNRWSQIATRLPGRTDNEIKNFWNSTLKKRLKNNSNNNTSSGSSPNNSNSNSLDPRDQHVDMGGNSTSLMDDYHHDENMMTVGNTMRMDSSSPFNVGPMVNSVGLNQLYDPLMISVPDNGYHQMGNTVNVFSVNGLGDYGNTILDPISKRVSVEGDDWFIPPSENTNVIACSTSNNLNLQALDPCFNSKNLCHSESFKVGNVLGIENGSWEIENPKIGDWDLDGLIDNNSSFPFLDFQVD
AtMYB5	AT3G13540	ATGATGTCATGTGGTGGGAAGAAGCCAGTGTCTAAGAAAACAACGCCGTGTTGCACGAAGATGGGGATGAAGAGAGGACCATGGACGGTGGAGGAAGACGAGATTCTTGTGAGCTTCATTAAGAAAGAAGGTGAAGGACGGTGGCGATCGCTTCCTAAGAGAGCTGGTTTACTCAGATGTGGAAAGAGCTGTCGTCTACGGTGGATGAACTATCTCCGACCCTCGGTTAAACGTGGAGGAATTACGTCGGACGAGGAAGATCTCATCCTCCGTCTTCACCGCCTCCTCGGCAACAGGTGGTCATTGATCGCGGGAAGGATACCGGGAAGGACTGATAATGAAATTAAGAACTATTGGAACACTCATCTTCGTAAGAAACTTTTAAGGCAAGGAATTGAT…	MMSCGGKKPVSKKTTPCCTKMGMKRGPWTVEEDEILVSFIKKEGEGRWRSLPKRAGLLRCGKSCRLRWMNYLRPSVKRGGITSDEEDLILRLHRLLGNRWSLIAGRIPGRTDNEIKNYWNTHLRKKLLRQGIDPQTHKPLDANNIHKPEEEVSGGQKYPLEPISSSHTDDTTVNGGDGDSKNSINVFGGEHGYEDFGFCYDDKFSSFLNSLINDVGDPFGNIIPISQPLQMDDCKDGIVGASSSSLGHD
AtMYB121	AT3G30210	ATGCTTGATTGGGGAGTTCAAGGTCATCATCAAAAGCATGATCATGATATTTATCAACAACAACATCAACAACAAGGATGTAGGAAGGGACCATGGACACTTGAAGAAGACAAGCTTCTCGCAGAGTATGTTACTTCGCATGGTGAAGGAAGATGGAGCACTGTAGCTAAGTGTGCAGGGTTGAATAGAAGTGGTAAAAGCTGTAGACTAAGGTGGGTGAACTACTTGAGGCCAGGGCTTAAGAGAGGACAAATCACTCCTCAAGAAGAAGGAATCATCCTTGAACTTCATTCCCTTTGGGGTAACAAGTGGTCTACAATCGCAAGATATTTACCAGGACGAACCGATAATGAAATAAAAAACTACTGGAGAACACATTACAAGAAAAACCAAAAATCT…	MLDWGVQGHHQKHDHDIYQQQHQQQGCRKGPWTLEEDKLLAEYVTSHGEGRWSTVAKCAGLNRSGKSCRLRWVNYLRPGLKRGQITPQEEGIILELHSLWGNKWSTIARYLPGRTDNEIKNYWRTHYKKNQKSSSKQDKVKKSLSRKQQQVDLKPQPQAQSENHQSQLVSQDHMNIDNDHNIASSLYYPTSVFDDKLYMPQSVATTSSDHSMIDEGHLWGSLWNLDEDDPHSFGGGSGQGTAADIDEKFPDSGIEAPSCGSGDYSYTGVYMGGYIF
AtMYB64	AT5G11050	ATGGAAGAACAGAAAATTCAAGAGAAGAGCCTCGCTCACGGCGCTGCACCACCGTTGACGGCGGTTGAGAGATTCTTGAACGGCCAAAAGAACGAAGCCTTGTGCTTCAAGAAACAAGAACGTTCTATAGACCGACCGATCGTGAAGACGACAAGGGCGATTGAGATTAGAAATGAAAACAAAGAGAACATGATGTTTGGTCCGAGGAAGGAGAAAAACTTGGCCGTTATTGGAGAAATCGTCGTTAAAGGTGCAGCTAAAGATTATACTTGCAAGGATATAACAAAGAAGCAACCATACAAGAATATCATCAAAGGGCAATGGACAGCCGATGAAGACAGGAAGTTGATAAAGTTGGTGATGCAACATGGAGAGAGGAAATGGGCAGTAATCTCGGAG…	MEEQKIQEKSLAHGAAPPLTAVERFLNGQKNEALCFKKQERSIDRPIVKTTRAIEIRNENKENMMFGPRKEKNLAVIGEIVVKGAAKDYTCKDITKKQPYKNIIKGQWTADEDRKLIKLVMQHGERKWAVISEKLEGRAGKQCRERWHNHLRPDIKKDSWSEEEERLLVEAHTRIGNKWAEIAKLIQGRTENSIKNHWNATKRRQNSKRKHKRSKNADSNSDIDDLSPSAKRPRILEDYIKNIENNDKNNGENIMTTSGNNVLSTSNYDQFNSEDSTSSLLDDPYDEELVFLKNIFENHSLENINLSQGTEITQSSSSGFMIENPKPKPNLYNNTFGTHLGAMVTEPANSSHLASDIYLSDLLNGTASSSSSLTFLSSNNNEHAGENELLLPQANSTSE…
AtMYB119	AT5G58850	ATGGAAGACCGACGCCTTGTCCATGGAGCTGCGCCGCCGTTGACAGCCGTGGAGAGATTCTTATACGGTCAAAAGAATGATGCCTTGTGTTCCAAGAAACAAGAGAGTTCTAGAGACCAACCGATCGTGAAGACAAAAATATCGATTGAGACTAGAAGCGACAACAAAGAGAACACAACGTTTGGGCCGACGAGGGAGAAACACTTGGTCCTTAATGGCGGCAACAGAAACCCTACTGGAGAAGTGGTCGCTAGAAGTGCAGCCAGAGATTATCAAAACAGTACGAAGAAACGATCATCCAAGAACCTCATCAAAGGGCAATGGACGGCGGAAGAAGACAGGAAGTTGATAAGGTTGGTGAGGCAACATGGGGAGAGGAAATGGGCAATGATATCGGAG…	MEDRRLVHGAAPPLTAVERFLYGQKNDALCSKKQESSRDQPIVKTKISIETRSDNKENTTFGPTREKHLVLNGGNRNPTGEVVARSAARDYQNSTKKRSSKNLIKGQWTAEEDRKLIRLVRQHGERKWAMISEKLEGRAGKQCRERWHNHLRPDIKKDGWSEEEERVLVESHMRIGNKWAEIAKLIPGRTENSIKNHWNATKRRQNSKRKHKRESNADNNDRDASPSAKRPCILQDYIKSIERNNINKDNDEKKNENTISVISTPNLDQIYSDGDSASSILGGPYDEELDYFQNIFANHPISLENLGLSQTSDEVTQSSSSGFMIKNPNPNLHDSVGIHHQEATITAPANTPHLASDIYLSYLLNGTTSSYSDTHFPSSSSSTSSTTVEHGGHNEFLEP…
AtMYB88	AT2G02820	ATGGAAGAGACAACTAAGCAGAACAACATGAAGAAGAAGAAGAAGATTCTTCTTCATTCCGATGATTCCAAGAAGAAGGAGCGTCATATTGTTACTTGGTCTCCTGAGGAGGATGATATACTAAGGAAGCAAATCAGTTTACAGGGAACTGAAAATTGGGCGATCATTGCATCCAAGTTTAATGATAAGAGCACAAGGCAGTGTAGAAGAAGATGGTATACATACTTGAACTCTGATTTCAAGAGAGGAGGTTGGTCCCCTGAAGAAGATACACTTTTGTGTGAGGCACAGAGATTGTTTGGGAATAGGTGGACTGAGATAGCAAAAGTGGTCTCAGGAAGAACGGATAATGCTGTGAAGAACAGGTTTACTACACTGTGCAAGAAGAGGGCTAAGCAT…	MEETTKQNNMKKKKKILLHSDDSKKKERHIVTWSPEEDDILRKQISLQGTENWAIIASKFNDKSTRQCRRRWYTYLNSDFKRGGWSPEEDTLLCEAQRLFGNRWTEIAKVVSGRTDNAVKNRFTTLCKKRAKHEAMAKENRIACCVNSDNKRLLFPDGISTPLKAESESPLTKKMRRSHIPNLTEIKSYGDRSHIKVESTMNQQRRHPFSVVAHNATSSDGTEEQKQIGNVKESDGEDKSNQEVFLKKDDSKVTALMQQAELLSSLAQKVNADNTDQSMENAWKVLQDFLNKSKENDLFRYGIPDIDFQLDEFKDLVEDLRSSNEDSQSSWRQPDLHDSPASSEYSSGSGSGSTIMTHPSGDKTQQLMSDTQTTSHQQNGGELLQDNGIVSDATVEQVG…
AtMYB124	AT1G14350	ATGGAAGATACGAAGAAGAAAAAGAAGAAGAATATTAACAACAACCAAGATTCCAAGAAAAAAGAGCGTCATATTGTTACTTGGTCACAAGAGGAAGATGTTATACTAAGAGAACAAATAACTCTACATGGAACTGAAAATTGGGCGATCATTGCATCAAAGTTCAAAGACAAAAGCACAAGACAATGCAGAAGAAGATGGTATACATACTTAAACTCTGATTTCAAAAGAGGAGGTTGGTCCCCTGAAGAAGATATGCTTTTGTGTGAGGCACAAAGAGTATTTGGTAATAGATGGACTGAGATAGCAAAGGTGGTTTCAGGCAGAACTGATAATGCTGTGAAGAACAGGTTTACAACACTTTGTAAGAAGAGAGCCAAGCATGAAGCTATGACTAAA…	MEDTKKKKKKNINNNQDSKKKERHIVTWSQEEDVILREQITLHGTENWAIIASKFKDKSTRQCRRRWYTYLNSDFKRGGWSPEEDMLLCEAQRVFGNRWTEIAKVVSGRTDNAVKNRFTTLCKKRAKHEAMTKDSNSNTKRMLFLDGISTPRKSENETPIAKKLKRSHILDLTEISNYGRAEACVNQQIRSPFSVLARNATGIDSLEEQNQTSNVNESDGEGMFLKKDDPKVTALMQQAELLSSLAQKVNADNTEQSMENAWKVLQDFLNKGKENDLFRYGIPDIDFKIEEFKDLIEDLRSGYEDNQLSWRQPDLHDSPASSEYSSGSTIMVDQSGDKTQPFSADTQTEHKQVGEELLVPKNPDENMPISGEEKFSSPIQVTPLFRSLADGIPSPQFSE…
AtMYB2	AT2G47190	ATGGAAGATTACGAGCGAATAAACTCAAACTCTCCAACACATGAAGAAGATTCTGATGTACGGAAAGGTCCATGGACCGAGGAAGAAGATGCAATCCTAGTCAACTTCGTCTCTATCCATGGCGATGCTCGTTGGAACCACATCGCTCGTTCCTCTGGGCTAAAGCGAACTGGTAAGAGTTGTAGATTAAGATGGCTTAATTACTTACGTCCAGATGTTAGAAGAGGCAACATCACTCTCGAAGAACAATTTATGATCCTCAAACTCCATTCTCTTTGGGGCAATAGGTGGTCGAAGATTGCGCAATATCTACCGGGAAGAACAGATAATGAAATAAAGAATTATTGGAGAACTCGAGTCCAAAAGCAAGCCAAACACCTAAGATGCGATGTTAACAGT…	MEDYERINSNSPTHEEDSDVRKGPWTEEEDAILVNFVSIHGDARWNHIARSSGLKRTGKSCRLRWLNYLRPDVRRGNITLEEQFMILKLHSLWGNRWSKIAQYLPGRTDNEIKNYWRTRVQKQAKHLRCDVNSNLFKETMRNVWMPRLVERINAQSLPTTCEQVESMITDPSQPVNEPSPVEPGFVQFSQNHHQQFVPATELSATSSNSPAETFSDVRGGVVNGSGYDPSGQTGFGEFNDWGCVGGDNMWTDEESFWFLQDQFCPDTTSYSYN
AtMYB24	AT5G40350	ATGGAGAAAAGAGAAAGTAGTGGTGGGTCTGGATCAGGAGATGCAGAGGTGAGAAAAGGGCCATGGACGATGGAAGAAGATTTGATTCTCATCAATTATATCGCCAATCATGGTGAAGGTGTTTGGAACTCTCTCGCCAAATCTGCAGGACTAAAACGCACCGGGAAAAGTTGCCGGCTCCGGTGGCTGAACTACCTCCGACCTGATGTGCGACGGGGAAATATCACACCAGAAGAACAGCTCACCATCATGGAACTTCATGCAAAATGGGGAAATAGGTGGTCAAAAATTGCAAAGCATTTACCAGGAAGAACCGACAATGAGATAAAGAATTTTTGGAGGACTAAGATCCAGAAATACATCATCAAGAGCGGAGAAACGACGACCGTTGGATCACAA…	MEKRESSGGSGSGDAEVRKGPWTMEEDLILINYIANHGEGVWNSLAKSAGLKRTGKSCRLRWLNYLRPDVRRGNITPEEQLTIMELHAKWGNRWSKIAKHLPGRTDNEIKNFWRTKIQKYIIKSGETTTVGSQSSEFINHHATTSHVMNDTQETMDMYSPTTSYQHASNINQQLNYGNYVPESGSIMMPLSVDQSEQNYWSVDDLWPMNIYNGN
AtMYB21	AT3G27810	ATGGAGAAAAGAGGAGGAGGAAGTAGTGGAGGTTCGGGATCATCAGCAGAAGCAGAAGTGAGAAAAGGACCATGGACGATGGAAGAAGATCTTATTCTTATCAACTATATCGCCAACCACGGCGATGGTGTTTGGAATTCTCTCGCCAAATCTGCAGGTCTAAAACGAACCGGGAAAAGTTGCCGGCTCCGGTGGCTGAACTATCTCCGCCCCGACGTACGACGGGGAAACATCACTCCAGAAGAGCAACTTATCATCATGGAACTTCATGCTAAGTGGGGAAACAGGTGGTCGAAAATCGCCAAACATCTTCCAGGAAGAACGGACAACGAGATCAAAAATTTCTGGAGGACAAGAATTCAAAAATACATCAAGCAATCGGATGTAACAACAACATCG…	MEKRGGGSSGGSGSSAEAEVRKGPWTMEEDLILINYIANHGDGVWNSLAKSAGLKRTGKSCRLRWLNYLRPDVRRGNITPEEQLIIMELHAKWGNRWSKIAKHLPGRTDNEIKNFWRTRIQKYIKQSDVTTTSSVGSHHSSEINDQAASTSSHNVFCTQDQAMETYSPTPTSYQHTNMEFNYGNYSAAAVTATVDYPVPMTVDDQTGENYWGMDDIWSSMHLLNGN
AtMYB98	AT4G18770	ATGGAGAATTTCGTCGACGAGAATGGTTTTGCTTCTCTAAACCAAAACATCTTCACACGTGATCAAGAACACATGAAAGAAGAAGATTTTCCATTCGAAGTCGTCGACCAATCAAAACCTACAAGCTTTCTTCAAGATTTTCACCATCTTGATCATGATCATCAGTTTGATCATCATCATCATCATGGCTCCTCATCTTCACATCCTTTGCTCAGCGTCCAAACTACGTCTTCTTGTATCAATAATGCTCCTTTCGAGCATTGCTCTTACCAAGAAAACATGGTCGATTTCTATGAAACTAAACCAAATTTGATGAATCATCATCATTTCCAAGCAGTGGAAAACTCATACTTCACTCGTAATCATCATCATCATCAAGAGATCAATTTGGTCGATGAA…	MENFVDENGFASLNQNIFTRDQEHMKEEDFPFEVVDQSKPTSFLQDFHHLDHDHQFDHHHHHGSSSSHPLLSVQTTSSCINNAPFEHCSYQENMVDFYETKPNLMNHHHFQAVENSYFTRNHHHHQEINLVDEHDDPMDLEQNNMMMMRMIPFDYPPTETFKPMNFVMPDEISCVSADNDCYRATSFNKTKPFLTRKLSSSSSSSSWKETKKSTLVKGQWTAEEDRVLIQLVEKYGLRKWSHIAQVLPGRIGKQCRERWHNHLRPDIKKETWSEEEDRVLIEFHKEIGNKWAEIAKRLPGRTENSIKNHWNATKRRQFSKRKCRSKYPRPSLLQDYIKSLNMGALMASSVPARGRRRESNNKKKDVVVAVEEKKKEEEVYGQDRIVPECVFTDDFGFNE…
AtDHL4	AT5G05790	ATGGAGACTCTGCATCCACTACTCTCGCACGTGCCAACTTCTGACCACCGGTTTGTAGTTCAAGAGATGATGTGCTTGCAAAGCTCGAGCTGGACTAAAGAAGAGAACAAGAAGTTTGAGCGAGCTCTTGCTGTCTACGCTGATGACACGCCTGATCGCTGGTTCAAAGTTGCTGCTATGATCCCTGGAAAGACCATATCAGATGTCATGAGGCAATACTCTAAGCTTGAAGAAGACCTCTTCGATATCGAAGCAGGACTTGTCCCGATCCCGGGTTACCGTTCAGTTACTCCTTGTGGATTTGATCAGGTTGTGAGTCCACGTGACTTTGATGCGTATCGTAAACTTCCTAATGGAGCCAGAGGATTTGATCAAGACCGTAGGAAAGGAGTTCCATGG…	METLHPLLSHVPTSDHRFVVQEMMCLQSSSWTKEENKKFERALAVYADDTPDRWFKVAAMIPGKTISDVMRQYSKLEEDLFDIEAGLVPIPGYRSVTPCGFDQVVSPRDFDAYRKLPNGARGFDQDRRKGVPWTEEEHRRFLLGLLKYGKGDWRNISRNFVGSKTPTQVASHAQKYYQRQLSGAKDKRRPSIHDITTVNLLNANLSRPSSDHGCLVSKQAEPKLGFTDRDNAEEGVMFLGQNLSSVFSSYDPAIKFSGANVYGEGGYCISQDLETRK
AtTF2	AT3G11280	ATGGAGACTCTGCATCCATTCTCTCACCTACCTATCTCTGACCACCGGTTCGTTGTTCAAGAGATGGTGAGCTTACACAGCTCGAGTAGCGGTAGCTGGACTAAAGAAGAGAACAAGATGTTCGAACGAGCTCTTGCGATATACGCTGAAGACTCGCCTGATCGCTGGTTTAAAGTTGCTTCCATGATCCCTGGAAAGACTGTTTTTGATGTTATGAAGCAATATAGTAAGCTTGAAGAAGACGTTTTCGATATTGAAGCAGGACGTGTTCCCATTCCTGGTTATCCTGCAGCTTCTTCTCCCTTGGGGTTTGACACGGACATGTGTCGTAAACGGCCTAGTGGAGCTAGAGGATCTGATCAAGATCGAAAGAAAGGAGTCCCTTGGACAGAGGAAGAA…	METLHPFSHLPISDHRFVVQEMVSLHSSSSGSWTKEENKMFERALAIYAEDSPDRWFKVASMIPGKTVFDVMKQYSKLEEDVFDIEAGRVPIPGYPAASSPLGFDTDMCRKRPSGARGSDQDRKKGVPWTEEEHRRFLLGLLKYGKGDWRNISRNFVVSKTPTQVASHAQKYYQRQLSGAKDKRRPSIHDITTGNLLNANLNRSFSDHRDILPDLGFIDKDDTEEGVIFMGQNLSSENLFSPSPTSFEAAINFAGENVFSAGA
AtMYBS1	AT1G49010	ATGGAGAGTGTGGTGGCAACATGGAGCAGAGAAGAAGAGAAAGCATTCGAGAACGCAATTGCGTTGCATTGTGTAGAGGAAGAGATAACAGAGGATCAATGGAACAAAATGTCGTCAATGGTACCAAGCAAAGCCTTAGAAGAAGTAAAGAAACATTACCAAATCCTTTTAGAAGATGTCAAAGCAATCGAGAATGGTCAAGTTCCTTTACCTCGTTATCATCACCGCAAAGGTCTCATCGTAGATGAAGCAGCAGCAGCAGCTACTTCTCCTGCCAACAGAGACTCTCATTCCTCTGGATCATCTGAGAAGAAACCAAATCCTGGCACCTCCGGGATAAGTAGCTCCAATGGAGGAAGAAGTGGTGGCTCGAGAGCTGAGCAAGAGAGAAGAAAAGGG…	MESVVATWSREEEKAFENAIALHCVEEEITEDQWNKMSSMVPSKALEEVKKHYQILLEDVKAIENGQVPLPRYHHRKGLIVDEAAAAATSPANRDSHSSGSSEKKPNPGTSGISSSNGGRSGGSRAEQERRKGIPWTEEEHRLFLLGLDKFGKGDWRSISRNFVISRTPTQVASHAQKYFIRLNSMNRDRRRSSIHDITTVNNQAPAVTGGGQQPQVVKHRPAQPQPQPQPQPQQHHPPTMAGLGMYGGAPVGQPIIAPPDHMGSAVGTPVMLPPPMGTHHHHHHHHLGVAPYAVPAYPVPPLPQQHPAPSTMH
AtMYB69	AT4G33450	ATGGAGATGTCTAGAGGAAGCAACAGTTTTGACAATAAGAAGCCTAGTTGCCAAAGAGGTCACTGGAGACCTGTTGAAGATGACAATCTCCGGCAACTCGTTGAACAATACGGTCCCAAGAACTGGAATTTTATTGCTCAACATCTCTATGGAAGATCAGGGAAAAGCTGTAGATTAAGATGGTACAACCAACTTGATCCAAACATCACCAAGAAACCCTTCACCGAGGAGGAAGAAGAGAGACTGCTTAAAGCTCATCGGATCCAAGGGAATCGTTGGGCCTCCATAGCCCGACTGTTCCCCGGGAGGACCGACAACGCTGTCAAAAACCATTTTCATGTCATCATGGCTAGACGCAAACGGGAAAACTTCTCTTCCACGGCTACTTCTACGTTCAAC…	MEMSRGSNSFDNKKPSCQRGHWRPVEDDNLRQLVEQYGPKNWNFIAQHLYGRSGKSCRLRWYNQLDPNITKKPFTEEEEERLLKAHRIQGNRWASIARLFPGRTDNAVKNHFHVIMARRKRENFSSTATSTFNQTWHTVLSPSSSLTRLNRSHFGLWRYRKDKSCGLWPYSFVSPPTNGQFGSSSVSNVHHEIYLERRKSKELVDPQNYTFHAATPDHKMTSNEDGPSMGDDGEKNDVTFIDFLGVGLAS
AtMYB1	AT3G09230	ATGGAGGCAGAGATCGTGAGACGATCGGAGGTAACGGGATTAAGAAGGGAGGTGGAAGAATCGTCAATTGGTAGAGGAGATTGCGATGGTGATGGCGGCGATGTGGGAGAAGATGCGGCAGGGTTCGTTGGGACGAGCGGGAGAGGAAGAAGAGATCGAGTTAAAGGGCCGTGGTCGAAGGAGGAGGATGATGTGTTGAGTGAGCTCGTTAAGAGGTTGGGAGCGAGGAATTGGAGTTTTATCGCTCGGAGTATTCCTGGTCGTTCAGGCAAGTCTTGTCGTCTTCGTTGGTGTAATCAGCTCAATCCAAATCTTATACGCAATTCATTTACTGAGGTAGAGGATCAGGCTATCATCGCAGCACATGCCATCCACGGAAACAAATGGGCTGTTATCGCG…	MEAEIVRRSEVTGLRREVEESSIGRGDCDGDGGDVGEDAAGFVGTSGRGRRDRVKGPWSKEEDDVLSELVKRLGARNWSFIARSIPGRSGKSCRLRWCNQLNPNLIRNSFTEVEDQAIIAAHAIHGNKWAVIAKLLPGRTDNAIKNHWNSALRRRFIDFEKAKNIGTGSLVVDDSGFDRTTTVASSEETLSSGGGCHVTTPIVSPEGKEATTSMEMSEEQCVEKTNGEGISRQDDKDPPTLFRPVPRLSSFNACNHMEGSPSPHIQDQNQLQSSKQDAAMLRLLEGAYSERFVPQTCGGGCCSNNPDGSFQQESLLGPEFVDYLDSPTFPSSELAAIATEIGSLAWLRSGLESSSVRVMEDAVGRLRPQGSRGHRDHYLVSEQGTNITNVLST
AtMYB75	AT1G56650	ATGGAGGGTTCGTCCAAAGGGCTGCGAAAAGGTGCTTGGACTACTGAAGAAGATAGTCTCTTGAGACAGTGCATTAATAAGTATGGAGAAGGCAAATGGCACCAAGTTCCTGTAAGAGCTGGGCTAAACCGGTGCAGGAAAAGTTGTAGATTAAGATGGTTGAACTATTTGAAGCCAAGTATCAAGAGAGGAAAACTTAGCTCTGATGAAGTCGATCTTCTTCTTCGCCTTCATAGGCTTCTAGGGAATAGGTGGTCTTTAATTGCTGGAAGATTACCTGGTCGGACCGCAAATGACGTCAAGAATTACTGGAACACTCATCTGAGTAAGAAACATGAACCGTGTTGTAAGATAAAGATGAAAAAGAGAGACATTACGCCCATTCCTACAACACCGGCA…	MEGSSKGLRKGAWTTEEDSLLRQCINKYGEGKWHQVPVRAGLNRCRKSCRLRWLNYLKPSIKRGKLSSDEVDLLLRLHRLLGNRWSLIAGRLPGRTANDVKNYWNTHLSKKHEPCCKIKMKKRDITPIPTTPALKNNVYKPRPRSFTVNNDCNHLNAPPKVDVNPPCLGLNINNVCDNSIIYNKDKKKDQLVNNLIDGDNMWLEKFLEESQEVDILVPEATTTEKGDTLAFDVDQLWSLFDGETVKFD
AtMYB114	AT1G66380	ATGGAGGGTTCGTCCAAAGGGTTGAGGAAAGGTGCATGGACTGCTGAAGAAGATAGTCTCTTGAGGCAGTGTATTGGTAAGTATGGAGAAGGCAAATGGCATCAAGTTCCTTTAAGAGCTGGGCTAAATCGGTGCAGGAAAAGTTGTAGACTAAGATGGTTAAACTATTTGAAGCCAAGTATCAAGAGAGGAAAATTTAGTTCTGATGAAGTTGATCTTCTTCTTCGTCTTCATAAGCTTCTAGGAAATAGGTGGTCCTTGATTGCTGGTCGATTACCTGGTCGGACCGCTAATGATGTCAAGAACTACTGGAACACCCATCTGAGTAAGAAGCATGAACCGTGTTGTAAAACTAAGATAAAAAGGATAAATATTATAACCCCTCCTAATACACCGGCC…	MEGSSKGLRKGAWTAEEDSLLRQCIGKYGEGKWHQVPLRAGLNRCRKSCRLRWLNYLKPSIKRGKFSSDEVDLLLRLHKLLGNRWSLIAGRLPGRTANDVKNYWNTHLSKKHEPCCKTKIKRINIITPPNTPAQKVDIF
AtMYB90	AT1G66390	ATGGAGGGTTCGTCCAAAGGGTTGAGGAAAGGTGCATGGACTGCTGAAGAAGATAGTCTCTTGAGGCTATGTATTGATAAGTATGGAGAAGGCAAATGGCATCAAGTTCCTTTGAGAGCTGGGCTAAATCGATGCAGAAAGAGTTGTAGACTAAGATGGTTGAACTATTTGAAGCCAAGTATCAAGAGAGGAAGACTTAGCAATGATGAAGTTGATCTTCTTCTTCGCCTTCATAAGCTTCTAGGAAATAGGTGGTCCTTGATTGCTGGTCGATTGCCTGGTCGGACCGCTAATGATGTCAAAAATTACTGGAACACCCATCTGAGTAAAAAACATGAGTCTTCGTGTTGTAAGTCTAAAATGAAAAAGAAAAACATTATTTCCCCTCCTACAACACCG…	MEGSSKGLRKGAWTAEEDSLLRLCIDKYGEGKWHQVPLRAGLNRCRKSCRLRWLNYLKPSIKRGRLSNDEVDLLLRLHKLLGNRWSLIAGRLPGRTANDVKNYWNTHLSKKHESSCCKSKMKKKNIISPPTTPVQKIGVFKPRPRSFSVNNGCSHLNGLPEVDLIPSCLGLKKNNVCENSITCNKDDEKDDFVNNLMNGDNMWLENLLGENQEADAIVPEATTAEHGATLAFDVEQLWSLFDGETVELD
AtMYB118	AT3G27785	ATGGAGTTCGAGTCAGTGTTCAAAATGCATTATCCGTATCTCGCAGCCGTTATCTACGATGATAGCTCCACTTTAAAAGATTTTCATCCATCTCTTACCGATGATTTTTCTTGTGTACACAATGTGCATCACAAACCATCGATGCCTCACACATATGAAATACCATCAAAAGAAACCATTAGGGGCATCACTCCTTCTCCATGCACTGAAGCTTTCGAGGCATGTTTTCATGGCACATCCAACGACCATGTTTTTTTTGGCATGGCCTATACCACCCCACCAACTATTGAACCCAACGTTTCACATGTCTCACATGACAATACTATGTGGGAAAACGATCAAAACCAAGGATTCATCTTTGGAACCGAGTCAACCCTCAATCAAGCCATGGCGGACTCT…	MEFESVFKMHYPYLAAVIYDDSSTLKDFHPSLTDDFSCVHNVHHKPSMPHTYEIPSKETIRGITPSPCTEAFEACFHGTSNDHVFFGMAYTTPPTIEPNVSHVSHDNTMWENDQNQGFIFGTESTLNQAMADSNQFNMPKPLLSANEDTIMNRRQNNQVMIKTEQIKKKNKRFQMRRICKPTKKASIIKGQWTPEEDKLLVQLVDLHGTKKWSQIAKMLQGRVGKQCRERWHNHLRPDIKKDGWTEEEDIILIKAHKEIGNRWAEIARKLPGRTENTIKNHWNATKRRQHSRRTKGKDEISLSLGSNTLQNYIRSVTYNDDPFMTANANANIGPRNMRGKGKNVMVAVSEYDEGECKYIVDGVNNLGLEDGRIKMPSLAAMSASGSASTSGSASGSGSG…
AtMYB27	AT3G53200	ATGGATTTTAAGAAGGAAGAAACACTTCGTAGAGGGCCATGGCTCGAAGAAGAAGACGAACGGCTAGTGAAGGTCATTAGTCTTTTGGGAGAACGTCGTTGGGATTCTTTAGCAATAGTTTCCGGTTTGAAGAGGAGTGGTAAGAGTTGCAGGCTAAGGTGGATGAACTATCTGAATCCGACTCTGAAGCGTGGACCGATGAGTCAAGAAGAAGAGAGAATCATCTTTCAGCTCCATGCTCTATGGGGTAACAAGTGGTCGAAGATTGCGAGAAGATTACCCGGTAGGACTGATAACGAGATAAAGAACTATTGGAGAACTCATTATAGAAAGAAACAGGAAGCTCAAAACTATGGAAAGCTCTTTGAGTGGAGAGGAAATACAGGAGAAGAATTGTTG…	MDFKKEETLRRGPWLEEEDERLVKVISLLGERRWDSLAIVSGLKRSGKSCRLRWMNYLNPTLKRGPMSQEEERIIFQLHALWGNKWSKIARRLPGRTDNEIKNYWRTHYRKKQEAQNYGKLFEWRGNTGEELLHKYKETEITRTKTTSQEHGFVEVVSMESGKEANGGVGGRESFGVMKSPYENRISDWISEISTDQSEANLSEDHSSNSCSENNINIGTWWFQETRDFEEFSCSLWS
AtDHL7	AT5G45420	ATGGATTTTTTCGACGAAGACAGGCCTAGATTCGTTTTCCAATCTCGTCCTTCTTCTTCTCACACGGCGGAGGAAGAAGAAGAAGCTAGAATCCCTAACAAGCTTTTCATTTCAATCTCCGTCTCAATCTCCCTCATCATATTATCTCTCTCCTTCTTCTACTTCGAATCTGAACCTGCCAAATCGCTACTATTATGGCTTTCCCTCTCTTTCCTCGTCGGTCCTTTCGCTCCTAGCTCGCTCACCGGAGGTAAGATTCGCGTCGGTTATGGTCAGATCTTGGAGCCAGAACAGATTCACGATGAGTCATCCACGGATAACGAACGTGAATCCAGGAGGAAATCGGTGAATAAGCGATCTAAAGGTTCGACGAAGAGCGATAATCCGCCGGAAAATGCT…	MDFFDEDRPRFVFQSRPSSSHTAEEEEEARIPNKLFISISVSISLIILSLSFFYFESEPAKSLLLWLSLSFLVGPFAPSSLTGGKIRVGYGQILEPEQIHDESSTDNERESRRKSVNKRSKGSTKSDNPPENASAVTEVSRKVVIPQSKESGSVNETKDWTAEEIEILKKQLIKHPAGKPGRWETVASAFGGRYKTENVIKKAKEIGEKKIYESDDYAQFLKNRKASDPRLVDENEENSGAGGDAEGTKEIWSNGEDIALLNALKAFPKEAAMRWEKIAAAVPGKSKAACMKRVTELKKGFRSSKTPAN
AtMYB102	AT4G21440	ATGGCAAGGTCACCTTGTTGCGAGAAGAACGGACTCAAGAAAGGGCCTTGGACATCTGAAGAAGACCAGAAGCTTGTTGACTATATCCAGAAACATGGTTATGGTAACTGGAGAACCCTCCCCAAAAATGCCGGTTTGCAAAGATGTGGCAAAAGTTGTAGGTTAAGGTGGACTAATTATCTCCGACCAGATATAAAGCGAGGAAGGTTCTCTTTTGAGGAAGAAGAAACCATTATTCAGCTTCATAGCTTCTTAGGAAACAAGTGGTCTGCGATTGCGGCGCGTTTACCAGGAAGAACAGATAATGAGATCAAGAACTTTTGGAACACTCATATAAGAAAGAAGCTACTTAGAATGGGGATTGATCCAGTGACTCACAGTCCACGACTCGATCTCCTC…	MARSPCCEKNGLKKGPWTSEEDQKLVDYIQKHGYGNWRTLPKNAGLQRCGKSCRLRWTNYLRPDIKRGRFSFEEEETIIQLHSFLGNKWSAIAARLPGRTDNEIKNFWNTHIRKKLLRMGIDPVTHSPRLDLLDISSILASSLYNSSSHHMNMSRLMMDTNRRHHQQHPLVNPEILKLATSLFSQNQNQNLVVDHDSRTQEKQTVYSQTGVNQYQTNQYFENTITQELQSSMPPFPNEARQFNNMDHHFNGFGEQNLVSTSTTSVQDCYNPSFNDYSSSNFVLDPSYSDQSFNFANSVLNTPSSSPSPTTLNSSYINSSSCSTEDEIESYCSNLMKFDIPDFLDVNGFII
AtMYB18	AT4G25560	ATGGCGAAGACGAAATATGGAGAGAGACATAGGAAAGGGTTATGGTCACCTGAAGAAGACGAGAAGCTAAGGAGCTTCATCCTCTCTTATGGCCATTCTTGCTGGACCACTGTTCCCATCAAAGCTGGGTTACAAAGGAATGGGAAGAGCTGCAGATTAAGATGGATTAATTACCTAAGACCAGGGTTAAAGAGGGATATGATTAGTGCAGAAGAAGAAGAGACTATCTTGACGTTTCATTCTTCCTTGGGTAACAAGTGGTCGCAAATAGCTAAATTCTTACCGGGAAGAACAGACAATGAGATAAAGAACTATTGGCACTCTCATTTGAAAAAGAAATGGCTCAAGTCTCAGAGCTTACAAGATGCAAAATCTATTTCCCCTCCTTCGTCTTCATCA…	MAKTKYGERHRKGLWSPEEDEKLRSFILSYGHSCWTTVPIKAGLQRNGKSCRLRWINYLRPGLKRDMISAEEEETILTFHSSLGNKWSQIAKFLPGRTDNEIKNYWHSHLKKKWLKSQSLQDAKSISPPSSSSSSLVACGKRNPETLISNHVFSFQRLLENKSSSPSQESNGNNSHQCSSAPEIPRLFFSEWLSSSYPHTDYSSEFTDSKHSQAPNVEETLSAYEEMGDVDQFHYNEMMINNSNWTLNDIVFGSKCKKQEHHIYREASDCNSSAEFFSPSTTT
AtMYB77	AT3G50060	ATGGCGGATCGTGTTAAAGGTCCATGGAGTCAAGAAGAAGATGAGCAGCTACGAAGGATGGTTGAGAAATACGGACCGAGGAATTGGTCTGCGATTAGCAAATCGATTCCAGGTCGATCTGGTAAATCGTGTAGATTACGTTGGTGTAATCAGTTATCTCCGGAGGTTGAGCATCGTCCTTTCTCGCCGGAGGAAGATGAGACTATTGTAACCGCCCGTGCTCAGTTTGGTAACAAGTGGGCGACGATTGCTCGTCTTCTTAACGGTCGTACGGATAACGCCGTTAAAAATCACTGGAACTCTACGCTTAAGAGGAAATGCAGCGGAGGTGTGGCGGTTACGACGGTGACGGAGACGGAGGAAGATCAGGATCGGCCGAAGAAGAGGAGATCTGTTAGC…	MADRVKGPWSQEEDEQLRRMVEKYGPRNWSAISKSIPGRSGKSCRLRWCNQLSPEVEHRPFSPEEDETIVTARAQFGNKWATIARLLNGRTDNAVKNHWNSTLKRKCSGGVAVTTVTETEEDQDRPKKRRSVSFDSAFAPVDTGLYMSPESPNGIDVSDSSTIPSPSSPVAQLFKPMPISGGFTVVPQPLPVEMSSSSEDPPTSLSLSLPGAENTSSSHNNNNNALMFPRFESQMKINVEERGEGRRGEFMTVVQEMIKAEVRSYMAEMQKTSGGFVVGGLYESGGNGGFRDCGVITPKVE
AtDIV2	AT5G04760	ATGGCGTCAAGTCAGTGGACGAGGTCGGAGGATAAGATGTTTGAGCAAGCTTTGGTTCTTTTTCCTGAAGGATCTCCTAATCGGTGGGAGAGAATCGCTGATCAGCTTCATAAATCTGCTGGTGAAGTTAGGGAGCATTACGAGGTCTTGGTTCATGATGTTTTCGAGATTGATTCTGGTCGAGTTGATGTCCCTGATTACATGGATGACTCGGCGGCTGCGGCGGCGGGTTGGGATTCCGCTGGTCAGATCTCTTTTGGGTCTAAACATGGCGAGAGTGAACGCAAAAGAGGAACTCCTTGGACAGAGAACGAACACAAATTGTTTCTGATCGGATTAAAGAGATATGGTAAGGGAGATTGGAGGAGTATCTCGAGAAACGTTGTGGTGACGAGGACA…	MASSQWTRSEDKMFEQALVLFPEGSPNRWERIADQLHKSAGEVREHYEVLVHDVFEIDSGRVDVPDYMDDSAAAAAGWDSAGQISFGSKHGESERKRGTPWTENEHKLFLIGLKRYGKGDWRSISRNVVVTRTPTQVASHAQKYFLRQNSVKKERKRSSIHDITTVDATLAMPGSNMDWTGQHGSPVQAPQQQQIMSEFGQQLNPGHFEDFGFRM
AtMYB49	AT5G54230	ATGGGAAAATCTTCAAGCTCGGAGGAAAGTGAAGTGAAGAAAGGGCCATGGACTCCGGAGGAAGACGAGAAGCTCGTAGGCTATATTCAAACGCACGGTCCCGGCAAATGGCGTACCCTTCCCAAGAACGCCGGGTTAAAAAGATGCGGGAAGAGTTGTAGATTGCGATGGACGAATTATCTAAGACCCGATATCAAGAGAGGAGAGTTCTCTCTTCAAGAGGAAGAAACCATCATTCAACTTCATCGTCTTCTTGGAAACAAATGGTCCGCAATTGCTATTCACTTACCAGGAAGAACAGATAATGAAATCAAAAACTATTGGAACACACATATTAAAAAGAAACTCTTACGAATGGGGATTGATCCGGTGACTCATTGTCCCCGCATTAATCTTCTC…	MGKSSSSEESEVKKGPWTPEEDEKLVGYIQTHGPGKWRTLPKNAGLKRCGKSCRLRWTNYLRPDIKRGEFSLQEEETIIQLHRLLGNKWSAIAIHLPGRTDNEIKNYWNTHIKKKLLRMGIDPVTHCPRINLLQLSSFLTSSLFKSMSQPMNTPFDLTTSNINPDILNHLTASLNNVQTESYQPNQQLQNDLNTDQTTFTGLLNSTPPVQWQNNGEYLGDYHSYTGTGDPSNNKVPQAGNYSSAAFVSDHINDGENFKAGWNFSSSMLAGTSSSSSTPLNSSSTFYVNGGSEDDRESFGSDMLMFHHHHDHNNNALNLS
AtMYB123	AT5G35550	ATGGGAAAGAGAGCAACTACTAGTGTGAGGAGAGAAGAGTTAAACAGAGGAGCTTGGACTGATCATGAAGACAAGATCCTTAGAGATTACATCACCACTCACGGCGAAGGCAAATGGAGCACTCTCCCTAACCAAGCTGGTCTCAAGAGGTGTGGCAAAAGCTGTAGACTTCGGTGGAAGAACTACCTAAGACCGGGGATAAAGCGCGGTAACATCTCATCTGATGAAGAAGAACTCATAATCCGTCTCCATAATCTTCTTGGAAACAGATGGTCGTTGATAGCTGGGAGGCTTCCAGGCCGAACAGACAATGAAATAAAGAATCATTGGAACTCAAACCTCCGCAAAAGACTTCCCAAAACTCAAACCAAGCAACCAAAACGTATAAAACATTCGACG…	MGKRATTSVRREELNRGAWTDHEDKILRDYITTHGEGKWSTLPNQAGLKRCGKSCRLRWKNYLRPGIKRGNISSDEEELIIRLHNLLGNRWSLIAGRLPGRTDNEIKNHWNSNLRKRLPKTQTKQPKRIKHSTNNENNVCVIRTKAIRCSKTLLFSDLSLQKKSSTSPLPLKEQEMDQGGSSLMGDLEFDFDRIHSEFHFPDLMDFDGLDCGNVTSLVSSNEILGELVPAQGNLDLNRPFTSCHHRGDDEDWLRDFTC
AtMYB17	AT3G61250	ATGGGAAGAACACCTTGTTGTGACAAGATTGGTTTGAAGAAAGGTCCTTGGACGCCTGAAGAAGATGAGGTTCTTGTTGCGCATATCAAGAAAAATGGACATGGAAGCTGGAGAACACTTCCTAAACTTGCTGGTTTACTTCGCTGTGGGAAGAGTTGCAGGCTGAGATGGACAAACTATCTGAGACCAGACATAAAGAGAGGTCCTTTCACTGCTGATGAAGAGAAACTTGTTATCCAGCTTCATGCCATTCTCGGCAACAGGTGGGCTGCTATTGCAGCACAGCTTCCAGGAAGAACAGACAACGAGATCAAGAACTTATGGAACACTCATTTGAAGAAACGTCTTTTATCTATGGGTCTTGATCCCAGAACTCATGAGCCATTACCTTCATATGGG…	MGRTPCCDKIGLKKGPWTPEEDEVLVAHIKKNGHGSWRTLPKLAGLLRCGKSCRLRWTNYLRPDIKRGPFTADEEKLVIQLHAILGNRWAAIAAQLPGRTDNEIKNLWNTHLKKRLLSMGLDPRTHEPLPSYGLAKQAPSSPTTRHMAQWESARVEAEARLSRESMLFSPSFYSGVVKTECDHFLRIWNSEIGEAFRNLAPLDESTITSQSPCSRATSTSSALLKSSTNSWGGKEVTVAIHGSDYSPYSNDLEDDSTDSALQLLLDFPISDDDMSFLEENIDSYSQAPPIGLVSMVSKF
AtMYB86	AT5G26660	ATGGGAAGACATTCTTGTTGTTTTAAGCAGAAGCTAAGAAAAGGCCTTTGGTCTCCTGAAGAAGATGAGAAACTTCTCAATTACATCACTAGACATGGTCATGGCTGTTGGAGTTCTGTCCCTAAACTCGCAGGTTTGCAAAGATGTGGAAAGAGTTGTAGACTTAGGTGGATAAATTATTTGAGACCAGATTTAAAGAGAGGAGCTTTCTCTCAAGACGAAGAAAGCTTGATCATTGAGCTCCATGCTGCATTAGGCAACAGATGGTCTCAAATCGCAACGCGGTTACCGGGAAGAACAGACAACGAGATCAAAAACTTTTGGAACTCATGTCTTAAGAAGAAGCTGAGAAGAAAAGGCATTGACCCAACAACACATAAACCCTTAATAACAAACGAG…	MGRHSCCFKQKLRKGLWSPEEDEKLLNYITRHGHGCWSSVPKLAGLQRCGKSCRLRWINYLRPDLKRGAFSQDEESLIIELHAALGNRWSQIATRLPGRTDNEIKNFWNSCLKKKLRRKGIDPTTHKPLITNELQSLNVIDQKLTSSEVVKSTGSINNLHDQSMVVSSQQGPWWFPANTTTTNQNSAFCFSSSNTTTVSDQIVSLISSMSTSSSPTPMTSNFSPAPNNWEQLNYCNTVPSQSNSIYSAFFGNQYTEASQTMNNNNPLVDQHHHHQDMKSWASEILHYTEHNQSSETVIEAEVKPDIANYYWRSASSSSSPNQEAATLLHDANVEVYGKNLQKLNNMVFDQSL
AtMYB94	AT3G47600	ATGGGAAGACCACCATGCTGTGACAAGATTGGAGTGAAGAAAGGACCATGGACACCAGAGGAAGATATCATCTTGGTTTCTTACATCCAAGAACATGGTCCTGGAAACTGGAGATCTGTGCCTACTCACACAGGTTTGAGGAGATGTAGCAAAAGCTGTAGATTGAGGTGGACTAATTATCTTCGACCTGGGATCAAGCGTGGAAATTTCACCGAGCATGAAGAGAAGATGATTCTCCATCTTCAAGCTCTTTTGGGAAACAGGTGGGCAGCTATAGCATCATATCTTCCAGAAAGGACAGACAATGATATAAAGAACTATTGGAACACTCATTTGAAGAAAAAGCTCAAGAAGATGAATGATTCTTGTGATAGTACTATCAACAATGGCCTTGATAAT…	MGRPPCCDKIGVKKGPWTPEEDIILVSYIQEHGPGNWRSVPTHTGLRRCSKSCRLRWTNYLRPGIKRGNFTEHEEKMILHLQALLGNRWAAIASYLPERTDNDIKNYWNTHLKKKLKKMNDSCDSTINNGLDNKDFSISNKNTTSHQSSNSSKGQWERRLQTDINMAKQALCDALSIDKPQNPTNFSIPDLGYGPSSSSSSTTTTTTTTRNTNPYPSGVYASSAENIARLLQNFMKDTPKTSVPLPVAATEMAITTAASSPSTTEGDGEGIDHSLFSFNSIDEAEEKPKLIDHDINGLITQGSLSLFEKWLFDEQSHDMIINNMSLEGQEVLF
AtMYB96	AT5G62470	ATGGGAAGACCACCTTGCTGTGAAAAGATTGGAGTGAAGAAAGGGCCATGGACACCAGAGGAAGACATCATCTTGGTTTCTTACATCCAAGAACATGGTCCTGGAAACTGGAGATCTGTCCCAACACACACAGGTTTGAGAAGATGTAGCAAGAGCTGCAGATTGAGATGGACTAATTATCTTCGACCCGGTATTAAGCGTGGAAATTTTACTGAGCATGAAGAGAAGACAATTGTTCATCTTCAAGCCCTTTTAGGCAACAGATGGGCAGCCATAGCATCATACCTTCCAGAAAGGACAGACAATGATATAAAGAACTATTGGAACACTCACTTGAAGAAGAAGCTCAAAAAGATTAATGAATCTGGTGAAGAAGATAATGATGGTGTCTCTTCATCA…	MGRPPCCEKIGVKKGPWTPEEDIILVSYIQEHGPGNWRSVPTHTGLRCSKSCRLRWTNYLRPGIKRGNFTEHEEKTIVHLQALLGNRWAAIASYLPERTDNDIKNYWNTHLKKKLKKINESGEEDNDGVSSSNTSSQKNHQSTNKGQWERRLQTDINMAKQALCEALSLDKPSSTLSSSSSLPTPVITQQNIRNFSSALLDRCYDPSSSSSSTTTTTTSNTTNPYPSGVYASSAENIARLLQDFMKDTPKALTLSSSSPVSETGPLTAAVSEEGGEGFEQSFFSFNSMDETQNLTQETSFFHDQVIKPEITMDQDHGLISQGSLSLFEKWLFDEQSHEMVGMALAGQEGMF
AtMYB35	AT3G28470	ATGGGAAGACCTCCTTGTTGTGACAAGTCCAATGTCAAGAAAGGTCTCTGGACCGAGGAAGAAGACGCTAAGATCCTTGCTTATGTTGCTATCCATGGTGTAGGAAACTGGAGCTTGATCCCCAAAAAAGCAGGTCTGAATCGATGTGGAAAGAGCTGTAGACTAAGATGGACTAATTACTTAAGACCTGACCTTAAACATGACAGCTTCTCTACCCAAGAAGAAGAGCTTATCATTGAGTGTCATAGAGCCATTGGCAGCAGGTGGTCTTCCATTGCACGAAAGCTTCCAGGAAGAACGGATAATGATGTGAAGAATCACTGGAACACAAAGCTGAAGAAGAAGCTGATGAAAATGGGGATAGACCCGGTGACTCATAAACCGGTTTCTCAACTCCTT…	MGRPPCCDKSNVKKGLWTEEEDAKILAYVAIHGVGNWSLIPKKAGLNRCGKSCRLRWTNYLRPDLKHDSFSTQEEELIIECHRAIGSRWSSIARKLPGRTDNDVKNHWNTKLKKKLMKMGIDPVTHKPVSQLLAEFRNISGHGNASFKTEPSNNSILTQSNSAWEMMRNTTTNHESYYTNSPMMFTNSSEYQTTPFHFYSHPNHLLNGTTSSCSSSSSSTSITQPNQVPQTPVTNFYWSDFLLSDPVPQVVGSSATSDLTFTQNEHHFNIEAEYISQNIDSKASGTCHSASSFVDEILDKDQEMLSQFPQLLNDFDY
AtMYB14	AT2G31180	ATGGGAAGAGCACCATGTTGTGAGAAAATGGGGGTGAAGAGAGGACCATGGACTCCTGAAGAAGATCAAATCTTGATCAATTATATTCATCTTTATGGTCATTCTAATTGGCGAGCTCTCCCAAAACACGCAGGTTTACTTAGATGTGGGAAAAGTTGCAGACTTCGTTGGATCAATTATCTTAGACCAGACATTAAACGTGGCAATTTCACTCCTCAAGAAGAACAAACTATTATCAATCTGCATGAAAGCTTAGGCAACAGATGGTCTGCGATTGCTGCAAAATTGCCGGGACGAACCGACAATGAAATAAAAAATGTTTGGCACACTCATTTGAAGAAAAGACTCAGCAAAAATCTAAACAATGGCGGAGACACCAAAGACGTTAACGGAATTAAC…	MGRAPCCEKMGVKRGPWTPEEDQILINYIHLYGHSNWRALPKHAGLLRCGKSCRLRWINYLRPDIKRGNFTPQEEQTIINLHESLGNRWSAIAAKLPGRTDNEIKNVWHTHLKKRLSKNLNNGGDTKDVNGINETTNEDKGSVIVDTASLQQFSNSITTFDISNDNKDDIMSYEDISALIDDSFWSDVISVDNSNKNEKKIEDWEGLIDRNSKKCSYSNSKLYNDDMEFWFDVFTSNRRIEEFSDIPEF
AtMYB87	AT4G37780	ATGGGAAGAGCACCGTGCTGCGACAAGATGGCGGTGAAGAAAGGGCCATGGTCGACGGAGGAAGATGCCGTGCTTAAGTCTTACATCGAAAAACACGGCACCGGCAACAACTGGATTTCCCTCCCTCAGAGAATTGGGATAAAGAGGTGCGGGAAGAGTTGTCGTTTGAGATGGCTTAATTACTTGAGGCCTAACTTAAAGCATGGAGGCTTCACCGATGAAGAAGATTACATCATTTGCAGCCTTTACATTACTATTGGAAGCAGGTGGTCTATCATTGCTTCACAATTACCGGGAAGAACAGACAACGACATCAAAAACTATTGGAACACGAGGCTGAAGAAGAAGCTATTGAGCAAGCAAGGGAAGGCATTTCATCAACAACTTAATGTCAAATTT…	MGRAPCCDKMAVKKGPWSTEEDAVLKSYIEKHGTGNNWISLPQRIGIKRCGKSCRLRWLNYLRPNLKHGGFTDEEDYIICSLYITIGSRWSIIASQLPGRTDNDIKNYWNTRLKKKLLSKQGKAFHQQLNVKFERGTTSSSSSQNQIQIFHDENTKSNQTLYNQVVDPSMRAFAMEEQSMIKNQILEPFSWEPNKVLFDVDYDAAASSYHHHASPSLNSMSSTSSIGTNNSSLQMSHYTVNHNDHDQPDMFFMDGFENFQAELFDEIANNNTVENGFDGTEILINNNYLDHDISSFIDYPLYDNE
AtMYB84	AT3G49690	ATGGGAAGAGCACCGTGTTGTGACAAAGCAAACGTGAAGAAAGGGCCTTGGTCTCCTGAGGAAGATGCAAAACTCAAATCTTACATTGAAAATAGTGGCACCGGAGGCAATTGGATCGCTTTGCCTCAAAAGATTGGTTTAAAGAGATGTGGAAAGAGTTGCAGGCTGAGGTGGCTTAACTATCTTAGACCAAACATCAAACATGGTGGCTTCTCTGAGGAAGAAGAAAACATCATTTGTAGCCTTTACCTTACAATTGGTAGCAGGTGGTCTATAATCGCTGCTCAATTGCCGGGACGAACAGACAACGATATAAAAAACTATTGGAACACGAGGCTCAAGAAGAAACTCATTAACAAACAACGCAAGGAGCTTCAAGAAGCTTGTATGGAGCAGCAA…	MGRAPCCDKANVKKGPWSPEEDAKLKSYIENSGTGGNWIALPQKIGLKRCGKSCRLRWLNYLRPNIKHGGFSEEEENIICSLYLTIGSRWSIIAAQLPGRTDNDIKNYWNTRLKKKLINKQRKELQEACMEQQEMMVMMKRQHQQQQIQTSFMMRQDQTMFTWPLHHHNVQVPALFMNQTNSFCDQEDVKPVLIKNMVKIEDQELEKTNPHHHQDSMTNAFDHLSFSQLLLDPNHNHLGSGEGFSMNSILSANTNSPLLNTSNDNQWFGNFQAETVNLFSGASTSTSADQSTISWEDISSLVYSDSKQFF
AtMYB68	AT5G65790	ATGGGAAGAGCACCGTGTTGTGATAAGGCCAACGTGAAGAAAGGGCCTTGGTCTCCTGAGGAAGACGCCAAACTCAAAGATTACATCGAGAATAGTGGCACAGGAGGCAACTGGATTGCTTTGCCTCAGAAAATTGGTTTAAGGAGATGTGGGAAGAGTTGCAGGCTAAGGTGGCTCAACTATTTGAGACCAAACATCAAACATGGTGGCTTCTCCGAGGAAGAAGACAACATCATTTGTAACCTCTATGTTACTATTGGTAGCAGGTGGTCTATAATTGCTGCACAATTGCCGGGAAGAACCGACAACGATATCAAAAACTATTGGAACACGAGGCTGAAGAAGAAGCTTCTGAACAAACAAAGGAAAGAGTTCCAAGAAGCGCGAATGAAGCAAGAG…	MGRAPCCDKANVKKGPWSPEEDAKLKDYIENSGTGGNWIALPQKIGLRRCGKSCRLRWLNYLRPNIKHGGFSEEEDNIICNLYVTIGSRWSIIAAQLPGRTDNDIKNYWNTRLKKKLLNKQRKEFQEARMKQEMVMMKRQQQGQGQGQSNGSTDLYLNNMFGSSPWPLLPQLPPPHHQIPLGMMEPTSCNYYQTTPSCNLEQKPLITLKNMVKIEEEQERTNPDHHHQDSVTNPFDFSFSQLLLDPNYYLGSGGGGEGDFAIMSSSTNSPLPNTSSDQHPSQQQEILQWFGSSNFQTEAINDMFINNNNNIVNLETIENTKVYGDASVAGAAVRAALGGGTTSTSADQSTISWEDITSLVNSEDASYFNAPNHV
AtMYB12	AT2G47460	ATGGGAAGAGCGCCATGTTGCGAGAAGGTCGGTATCAAGAGAGGGCGGTGGACGGCGGAGGAGGACCAGATTCTCTCCAACTACATTCAATCCAACGGTGAAGGTTCTTGGAGATCTCTCCCCAAAAATGCCGGATTAAAAAGGTGTGGAAAGAGCTGTAGATTGAGATGGATAAACTATCTAAGATCAGACCTCAAGCGTGGAAACATAACTCCAGAAGAAGAAGAACTCGTTGTTAAATTGCATTCCACTTTGGGAAACAGGTGGTCACTAATCGCGGGTCATCTACCAGGGAGAACAGACAACGAAATAAAAAATTATTGGAACTCTCATCTCAGCCGTAAACTCCACAACTTCATTAGGAAGCCATCCATCTCTCAAGACGTCTCCGCCGTAATC…	MGRAPCCEKVGIKRGRWTAEEDQILSNYIQSNGEGSWRSLPKNAGLKRCGKSCRLRWINYLRSDLKRGNITPEEEELVVKLHSTLGNRWSLIAGHLPGRTDNEIKNYWNSHLSRKLHNFIRKPSISQDVSAVIMTNASSAPPPPQAKRRLGRTSRSAMKPKIHRTKTRKTKKTSAPPEPNADVAGADKEALMVESSGAEAELGRPCDYYGDDCNKNLMSINGDNGVLTFDDDIIDLLLDESDPGHLYTNTTCGGDGELHNIRDSEGARGFSDTWNQGNLDCLLQSCPSVESFLNYDHQVNDASTDEFIDWDCVWQEGSDNNLWHEKENPDSMVSWLLDGDDEATIGNSNCENFGEPLDHDDESALVAWLLS
AtMYB36	AT5G57620	ATGGGAAGAGCTCCATGCTGCGACAAGGCAAACGTGAAGAAAGGACCATGGTCACCGGAAGAAGATGTGAAGCTCAAGGATTACATCGACAAATATGGCACTGGTGGCAACTGGATCGCACTGCCTCAGAAAATTGGGCTGAAGAGATGTGGTAAGAGTTGCAGACTGAGATGGCTTAATTACTTAAGACCAAACATCAAACATGGTGGTTTTTCTGAGGAAGAAGATAGAATCATCTTGAGTCTCTACATTAGCATTGGAAGCCGGTGGTCCATAATTGCAGCTCAGCTTCCTGGAAGGACTGACAATGATATCAAGAATTATTGGAACACAAAACTGAAGAAGAAACTTCTAGGAAGACAGAAACAAATGAATCGTCAAGACTCCATAACCGATTCT…	MGRAPCCDKANVKKGPWSPEEDVKLKDYIDKYGTGGNWIALPQKIGLKRCGKSCRLRWLNYLRPNIKHGGFSEEEDRIILSLYISIGSRWSIIAAQLPGRTDNDIKNYWNTKLKKKLLGRQKQMNRQDSITDSTENNLSNNNNNKSPQNLSNSALERLQLHMQLQNLQSPFSSFYNNPILWPKLHPLLQSTTTNQNPKLASQESFHPLGVNVDHQHNNTKLAQINNGASSLYSENVEQSQNPAHEFQPNFGFSQDLRLDNHNMDFMNRGVSKELFQVGNEFELTNGSSWWSEEVELERKTTSSSSWGSASVLDQTTEGMVMLQDYAQMSYHSV
AtMYB15	AT3G23250	ATGGGAAGAGCTCCATGCTGTGAGAAGATGGGGTTGAAGAGAGGACCATGGACACCTGAAGAAGATCAAATCTTGGTCTCTTTTATCCTCAACCATGGACATAGTAACTGGCGAGCCCTCCCTAAGCAAGCTGGTCTTTTGAGATGTGGAAAAAGCTGTAGACTTAGGTGGATGAACTATTTAAAGCCTGATATTAAACGTGGCAATTTCACCAAAGAAGAGGAAGATGCTATCATCAGCTTACACCAAATACTTGGCAATAGATGGTCAGCGATTGCAGCAAAACTGCCTGGAAGAACCGATAACGAGATCAAGAACGTATGGCACACTCACTTGAAGAAGAGACTCGAAGATTATCAACCAGCTAAACCTAAGACCAGCAACAAAAAGAAGGGTACT…	MGRAPCCEKMGLKRGPWTPEEDQILVSFILNHGHSNWRALPKQAGLLRCGKSCRLRWMNYLKPDIKRGNFTKEEEDAIISLHQILGNRWSAIAAKLPGRTDNEIKNVWHTHLKKRLEDYQPAKPKTSNKKKGTKPKSESVITSSNSTRSESELADSSNPSGESLFSTSPSTSEVSSMTLISHDGYSNEINMDNKPGDISTIDQECVSFETFGADIDESFWKETLYSQDEHNYVSNDLEVAGLVEIQQEFQNLGSANNEMIFDSEMDFWFDVLARTGGEQDLLAGL
AtMYB37	AT5G23000	ATGGGAAGAGCTCCGTGTTGCGACAAGACAAAAGTGAAGCGAGGGCCTTGGTCGCCTGAAGAAGACTCTAAACTTAGAGATTACATTGAAAAGTATGGTAATGGTGGAAATTGGATCTCTTTCCCCCTCAAAGCCGGTTTGAGGAGATGTGGGAAGAGTTGTAGACTGAGGTGGCTAAACTATTTGAGACCAAACATAAAGCATGGTGACTTCTCTGAGGAAGAAGACAGGATCATTTTTAGTCTCTTCGCTGCCATAGGAAGCAGGTGGTCAATAATAGCAGCTCATCTACCGGGACGAACAGACAACGACATAAAAAACTATTGGAACACAAAGCTAAGGAAGAAACTCTTGTCTTCTTCCTCTGATTCATCATCATCAGCCATGGCTTCTCCTTAT…	MGRAPCCDKTKVKRGPWSPEEDSKLRDYIEKYGNGGNWISFPLKAGLRRCGKSCRLRWLNYLRPNIKHGDFSEEEDRIIFSLFAAIGSRWSIIAAHLPGRTDNDIKNYWNTKLRKKLLSSSSDSSSSAMASPYLNPISQDVKRPTSPTTIPSSSYNPYAENPNQYPTKSLISSINGFEAGDKQIISYINPNYPQDLYLSDSNNNTSNANGFLLNHNMCDQYKNHTSFSSDVNGIRSEIMMKQEEIMMMMMIDHHIDQRTKGYNGEFTQGYYNYYNGHGDLKQMISGTGTNSNINMGGSGSSSSSISNLAENKSSGSLLLEYKCLPYFYS
AtMYB3	AT1G22640	ATGGGAAGATCACCATGCTGCGAGAAAGCTCACATGAACAAAGGAGCTTGGACTAAAGAAGAAGATCAGCTTCTTGTTGATTACATCCGTAAACACGGTGAAGGTTGCTGGCGATCTCTCCCTCGCGCCGCTGGATTACAAAGATGTGGTAAGAGTTGTAGATTGAGATGGATGAATTATCTAAGACCAGATCTCAAAAGAGGCAATTTTACTGAAGAAGAAGATGAACTCATCATCAAGCTCCATAGCTTGCTCGGTAACAAATGGTCTTTAATAGCTGGGAGATTACCAGGAAGAACAGATAACGAGATCAAGAACTATTGGAACACTCATATCAAGAGGAAGCTTCTCAGCCGTGGGATTGATCCAAACTCTCACCGTCTGATCAACGAATCCGTC…	MGRSPCCEKAHMNKGAWTKEEDQLLVDYIRKHGEGCWRSLPRAAGLQRCGKSCRLRWMNYLRPDLKRGNFTEEEDELIIKLHSLLGNKWSLIAGRLPGRTDNEIKNYWNTHIKRKLLSRGIDPNSHRLINESVVSPSSLQNDVVETIHLDFSGPVKPEPVREEIGMVNNCESSGTTSEKDYGNEEDWVLNLELSVGPSYRYESTRKVSVVDSAESTRRWGSELFGAHESDAVCLCCRIGLFRNESCRNCRVSDVRTH
AtMYB8	AT1G35515	ATGGGAAGATCACCATGTTGTGAAAAGGCTCACATGAACAAAGGAGCATGGACTAAAGAAGAAGATCAACGTCTTATTGATTATATACGTAATCATGGTGAAGGCTCTTGGCGTTCTCTTCCTAAATCCGTTGGGTTGTTGCGTTGTGGAAAAAGTTGTAGATTAAGATGGATTAATTACCTTCGTCCTGATCTTAAACGTGGAAATTTCACTGATGGTGAAGAGCAAATCATTGTCAAACTTCATAGTTTATTTGGCAACAAATGGTCTTTGATTGCTGGGAAATTACCGGGAAGAACCGATAATGAGATTAAAAATTATTGGAACACTCATATAAAAAGGAAGCTTCTTAACCGTGGTATTGACCCAAAAACTCACGGTTCGATCATCGAGCCTAAA…	MGRSPCCEKAHMNKGAWTKEEDQRLIDYIRNHGEGSWRSLPKSVGLLRCGKSCRLRWINYLRPDLKRGNFTDGEEQIIVKLHSLFGNKWSLIAGKLPGRTDNEIKNYWNTHIKRKLLNRGIDPKTHGSIIEPKTTSFHPRNEDLKSTFPGSVKLKMETSCENCASTSGTTTDEDLRLSVDCDYRYDHLDKELNLDLTLGYSPTRFVGVGSCY
AtMYB39	AT4G17785	ATGGGAAGATCACCGTGTTGCGATCAAGACAAAGGCGTGAAGAAAGGACCGTGGCTGCCAGAAGAAGATGATAAGCTCACTGCTTATATAAACGAGAATGGTTATGGGAATTGGCGGTCGCTTCCTAAGCTCGCTGGACTTAACCGCTGTGGCAAGAGCTGTCGGCTCCGGTGGATGAATTATCTCCGGCCTGATATCCGGAGAGGCAAATTTTCCGATGGAGAAGAGAGTACTATCGTTAGACTCCATGCCCTCCTTGGCAACAAATGGTCGAAAATTGCGGGTCATCTTCCAGGAAGAACAGATAATGAAATTAAAAACTATTGGAACACTCATATGAGGAAGAAGTTATTGCAAATGGGGATTGATCCAGTGACGCACGAGCCAAGAACCAACGAT…	MGRSPCCDQDKGVKKGPWLPEEDDKLTAYINENGYGNWRSLPKLAGLNRCGKSCRLRWMNYLRPDIRRGKFSDGEESTIVRLHALLGNKWSKIAGHLPGRTDNEIKNYWNTHMRKKLLQMGIDPVTHEPRTNDLSPILDVSQMLAAAINNGQFGNNNLLNNNTALEDILKLQLIHKMLQIITPKAIPNISSFKTNLLNPKPEPVVNSFNTNSVNPKPDPPAGLFINQSGITPEAASDFIPSYENVWDGFEDNQLPGLVTVSQESLNTAKPGTSTTTKVNDHIRTGMMPCYYGDQLLETPSTGSVSVSPETTSLNHPSTAQHSSGSDFLEDWEKFLDDETSDSCWKSFLDLTSPTSSPVPW
AtMYB41	AT4G28110	ATGGGAAGATCACCTTGTTGTGATAAAAATGGAGTGAAGAAGGGACCATGGACTGCTGAGGAGGATCAGAAACTCATCGATTATATTCGATTTCATGGTCCTGGCAATTGGCGTACGCTCCCCAAAAATGCTGGACTCCATAGATGTGGAAAAAGCTGCCGTCTTCGATGGACCAATTATCTAAGACCGGACATCAAGAGAGGAAGATTCTCGTTCGAGGAAGAAGAAACTATCATTCAGCTACACAGTGTTATGGGAAACAAGTGGTCAGCAATAGCCGCTCGTCTACCAGGGAGGACCGATAACGAAATAAAAAACCATTGGAACACTCACATCCGCAAGAGACTTGTAAGGAGTGGTATCGACCCTGTTACTCATTCTCCACGCCTTGATCTTCTT…	MGRSPCCDKNGVKKGPWTAEEDQKLIDYIRFHGPGNWRTLPKNAGLHRCGKSCRLRWTNYLRPDIKRGRFSFEEEETIIQLHSVMGNKWSAIAARLPGRTDNEIKNHWNTHIRKRLVRSGIDPVTHSPRLDLLDLSSLLSALFNQPNFSAVATHASSLLNPDVLRLASLLLPLQNPNPVYPSNLDQNLQTPNTSSESSQPQAETSTVPTNYETSSLEPMNARLDDVGLADVLPPLSESFDLDSLMSTPMSSPRQNSIEAETNSSTFFDFGIPEDFILDDFMF
AtMYB92	AT5G10280	ATGGGAAGATCTCCTATCTCTGATGACTCTGGTCTCAAGAAAGGTCCTTGGACTCCTGATGAAGATGAGAAACTTGTCAACTATGTTCAAAAACATGGTCATAGTAGCTGGAGAGCCCTTCCCAAACTCGCTGGTCTTAACAGGTGTGGGAAGAGTTGCAGGCTAAGATGGACGAACTACTTGAGACCAGACATCAAGAGAGGGAGATTCTCTCCGGACGAGGAACAGACTATCTTGAATCTTCATTCAGTTCTTGGAAACAAGTGGTCAACGATTGCGAATCAGTTACCAGGGAGAACAGATAACGAGATCAAGAATTTCTGGAACACTCATTTGAAGAAGAAGCTGATTCAGATGGGTTTTGATCCAATGACTCACCGTCCAAGAACCGATATCTTC…	MGRSPISDDSGLKKGPWTPDEDEKLVNYVQKHGHSSWRALPKLAGLNRCGKSCRLRWTNYLRPDIKRGRFSPDEEQTILNLHSVLGNKWSTIANQLPGRTDNEIKNFWNTHLKKKLIQMGFDPMTHRPRTDIFSGLSQLMSLSSNLRGFVDLQQQFPIDQEHTILKLQTEMAKLQLFQYLLQPSSMSNNVNPNDFDTLSLLNSIASFKETSNNTTSNNLDLGFLGSYLQDFHSLPSLKTLNSNMEPSSVFPQNLDDNHFKFSTQRENLPVSPIWLSDPSSTTPAHVNDDLIFNQYGIEDVNSNITSSSGQESGASASAAWPDHLLDDSIFSDIP
AtMYB7	AT2G16720	ATGGGAAGATCTCCTTGCTGCGAGAAAGAACACATGAACAAAGGTGCTTGGACTAAAGAAGAAGATGAGAGACTAGTCTCTTACATCAAGTCTCACGGTGAAGGTTGTTGGCGATCTCTTCCTAGAGCCGCTGGTCTCCTTCGCTGCGGTAAAAGCTGCCGTCTTCGGTGGATTAACTATCTCCGACCTGATCTCAAAAGAGGAAACTTTACACATGATGAAGATGAACTTATCATCAAGCTTCATAGCCTCCTAGGCAACAAGTGGTCTTTGATTGCGGCGAGATTACCTGGAAGAACAGATAACGAGATCAAGAACTACTGGAACACACATATAAAGAGGAAGCTTTTGAGCAAAGGGATTGATCCAGCCACTCATAGAGGGATCAACGAGGCAAAA…	MGRSPCCEKEHMNKGAWTKEEDERLVSYIKSHGEGCWRSLPRAAGLLRCGKSCRLRWINYLRPDLKRGNFTHDEDELIIKLHSLLGNKWSLIAARLPGRTDNEIKNYWNTHIKRKLLSKGIDPATHRGINEAKISDLKKTKDQIVKDVSFVTKFEETDKSGDQKQNKYIRNGLVCKEERVVVEEKIGPDLNLELRISPPWQNQREISTCTASRFYMENDMECSSETVKCQTENSSSISYSSIDISSSNVGYDFLGLKTRILDFRSLEMK
AtMYB6	AT4G09460	ATGGGAAGATCTCCTTGTTGTGAAAAAGCTCACACAAACAAAGGAGCTTGGACTAAAGAAGAAGATCAACGTCTCGTAGATTATATCCGTAATCACGGTGAAGGTTGTTGGCGTTCTCTTCCTAAATCCGCTGGATTGTTGCGTTGTGGTAAAAGTTGTAGATTGAGATGGATTAATTACCTTCGTCCTGATCTTAAACGTGGTAATTTTACTGATGATGAAGATCAAATCATCATCAAACTCCATAGCTTACTCGGTAACAAATGGTCATTGATAGCTGGAAGATTACCAGGAAGAACAGATAACGAAATAAAGAATTATTGGAACACTCATATTAAGAGGAAGCTTCTTAGTCACGGTATTGATCCACAAACTCATCGTCAGATTAACGAATCCAAA…	MGRSPCCEKAHTNKGAWTKEEDQRLVDYIRNHGEGCWRSLPKSAGLLRCGKSCRLRWINYLRPDLKRGNFTDDEDQIIIKLHSLLGNKWSLIAGRLPGRTDNEIKNYWNTHIKRKLLSHGIDPQTHRQINESKTVSSQVVVPIQNDAVEYSFSNLAVKPKTENSSDNGASTSGTTTDEDLRQNGECYYSDNSGHIKLNLDLTLGFGSWSGRIVGVGSSADSKPWCDPVMEARLSLL
AtMYB42	AT4G12350	ATGGGAAGGCAGCCATGTTGTGACAAGCTCATGGTGAAGAAGGGGCCGTGGACGGCGGAGGAAGACAAGAAACTGATAAACTTTATCTTGACCAACGGCCACTGTTGCTGGAGGGCTTTGCCGAAGCTGGCCGGTCTCCGTCGCTGTGGGAAGAGCTGCCGTCTACGGTGGACCAATTATCTCCGACCTGACTTGAAGAGAGGTCTTCTCTCCGACGCCGAGGAACAGCTTGTCATCGACCTTCATGCTCTTCTCGGCAACAGATGGTCCAAGATCGCTGCAAGATTACCAGGAAGAACAGACAACGAAATAAAAAATCATTGGAATACTCATATCAAGAAGAAGCTCCTTAAGATGGAAATCGATCCTTCGACCCATCAACCTTTAAACAAAGTATTT…	MGRQPCCDKLMVKKGPWTAEEDKKLINFILTNGHCCWRALPKLAGLRRCGKSCRLRWTNYLRPDLKRGLLSDAEEQLVIDLHALLGNRWSKIAARLPGRTDNEIKNHWNTHIKKKLLKMEIDPSTHQPLNKVFTDTNLVDKSETSSKADNVNDNKIVEIDGTTTNTIDDSIITHQNSSNDDYELLGDIIHNYGDLFNILWTNDEPPLVDDASWSNHNVGIGGTAAVAASDKNNTAAEEDFPERSFEKQNGESWMFLDYCQEFGVEDFGFECYHGFGQSSMKTGHKD
AtMYB111	AT5G49330	ATGGGAAGGGCTCCGTGTTGTGAGAAAATCGGGTTGAAGAGAGGGAGATGGACAGCCGAGGAAGATGAGATCCTCACCAAGTATATTCAGACCAATGGTGAAGGTTCTTGGCGATCTTTGCCTAAGAAAGCTGGATTGTTGAGATGTGGAAAGAGCTGTAGACTAAGGTGGATAAACTACTTAAGAAGAGACTTAAAAAGAGGAAATATTACTTCCGACGAAGAAGAAATAATCGTCAAGTTGCATTCCCTTCTCGGCAACAGATGGTCACTTATTGCAACACATCTACCAGGAAGAACAGACAACGAAATTAAAAACTATTGGAACTCACATCTCAGCCGCAAAATCTATGCCTTCACTGCCGTTTCCGGAGATGGACACAATCTACTCGTCAACGAT…	MGRAPCCEKIGLKRGRWTAEEDEILTKYIQTNGEGSWRSLPKKAGLLRCGKSCRLRWINYLRRDLKRGNITSDEEEIIVKLHSLLGNRWSLIATHLPGRTDNEIKNYWNSHLSRKIYAFTAVSGDGHNLLVNDVVLKKSCSSSSGAKNNNKTKKKKKGRTSRSSMKKHKQMVTASQCFSQPKELESDFSEGGQNGNFEGESLGPYEWLDGELERLLSSCVWECTSEEAVIGVNDEKVCESGDNSSCCVNLFEEEQGSETKIGHVGITEVDHDMTVEREREGSFLSSNSNENNDKDWWVGLCNSSEVGFGVDEELLDWEFQGNVTCQSDDLWDLSDIGEITLE
AtMYB4	AT4G38620	ATGGGAAGGTCACCGTGCTGTGAGAAAGCTCACACAAACAAAGGAGCATGGACGAAAGAAGAGGACGAGAGGCTCGTCGCCTACATTAAAGCTCATGGAGAAGGCTGCTGGAGATCTCTCCCCAAAGCCGCCGGACTTCTTCGCTGTGGCAAGAGCTGCCGTCTCCGGTGGATCAACTATCTCCGGCCTGACCTTAAGCGTGGAAACTTCACCGAGGAAGAAGACGAACTCATCATCAAGCTCCATAGCCTTCTTGGCAACAAATGGTCGCTTATTGCCGGGAGATTACCGGGAAGAACAGATAACGAGATAAAGAACTATTGGAACACGCATATACGAAGAAAGCTTATAAACAGAGGGATTGATCCAACGAGTCATAGACCAATCCAAGAATCATCA…	MGRSPCCEKAHTNKGAWTKEEDERLVAYIKAHGEGCWRSLPKAAGLLRCGKSCRLRWINYLRPDLKRGNFTEEEDELIIKLHSLLGNKWSLIAGRLPGRTDNEIKNYWNTHIRRKLINRGIDPTSHRPIQESSASQDSKPTQLEPVTSNTINISFTSAPKVETFHESISFPGKSEKISMLTFKEEKDECPVQEKFPDLNLELRISLPDDVDRLQGHGKSTTPRCFKCSLGMINGMECRCGRMRCDVVGGSSKGSDMSNGFDFLGLAKKETTSLLGFRSLEMK
AtMYB32	AT4G34990	ATGGGAAGGTCTCCTTGCTGTGAGAAAGACCACACAAACAAAGGAGCTTGGACTAAGGAAGAAGACGATAAGCTCATCTCTTACATCAAAGCTCACGGTGAAGGTTGTTGGCGTTCTCTTCCTAGATCCGCCGGTCTTCAACGTTGCGGAAAAAGCTGTCGTCTCCGATGGATTAACTATCTCCGACCTGATCTCAAGAGGGGTAACTTCACCCTCGAAGAAGATGATCTCATCATCAAACTACATAGCCTTCTCGGTAACAAGTGGTCTCTTATTGCGACGAGATTACCAGGAAGAACAGATAACGAGATTAAGAATTACTGGAACACACATGTTAAGAGGAAGCTATTAAGAAAAGGGATTGATCCGGCGACTCATCGACCTATCAACGAGACCAAA…	MGRSPCCEKDHTNKGAWTKEEDDKLISYIKAHGEGCWRSLPRSAGLQRCGKSCRLRWINYLRPDLKRGNFTLEEDDLIIKLHSLLGNKWSLIATRLPGRTDNEIKNYWNTHVKRKLLRKGIDPATHRPINETKTSQDSSDSSKTEDPLVKILSFGPQLEKIANFGDERIQKRVEYSVVEERCLDLNLELRISPPWQDKLHDERNLRFGRVKYRCSACRFGFGNGKECSCNNVKCQTEDSSSSSYSSTDISSSIGYDFLGLNNTRVLDFSTLEMK
AtMYB74	AT4G05100	ATGGGACGATCACCATGTTGTGAGAAGAAGAATGGTCTCAAGAAAGGACCATGGACTCCTGAGGAGGATCAAAAGCTCATTGATTATATCAATATACATGGTTATGGAAATTGGAGAACTCTTCCCAAGAATGCTGGGTTACAAAGATGTGGTAAGAGTTGTCGTCTCCGGTGGACCAACTATCTCCGACCAGATATTAAGCGTGGAAGATTCTCTTTTGAAGAAGAAGAAACCATTATTCAACTTCACAGCATCATGGGAAACAAGTGGTCTGCGATTGCGGCTCGTTTGCCTGGAAGAACAGACAACGAGATCAAAAACTATTGGAACACTCACATCAGAAAAAGACTTCTAAAGATGGGAATCGACCCGGTTACACACACTCCACGTCTTGATCTT…	MGRSPCCEKKNGLKKGPWTPEEDQKLIDYINIHGYGNWRTLPKNAGLQRCGKSCRLRWTNYLRPDIKRGRFSFEEEETIIQLHSIMGNKWSAIAARLPGRTDNEIKNYWNTHIRKRLLKMGIDPVTHTPRLDLLDISSILSSSIYNSSHHHHHHHQQHMNMSRLMMSDGNHQPLVNPEILKLATSLFSNQNHPNNTHENNTVNQTEVNQYQTGYNMPGNEELQSWFPIMDQFTNFQDLMPMKTTVQNSLSYDDDCSKSNFVLEPYYSDFASVLTTPSSSPTPLNSSSSTYINSSTCSTEDEKESYYSDNITNYSFDVNGFLQFQ
AtMYB58	AT1G16490	ATGGGCAAAGGAAGAGCACCATGTTGTGACAAAACCAAAGTGAAGAGAGGACCATGGAGCCATGATGAAGACTTGAAACTCATCTCTTTCATTCACAAGAATGGTCATGAGAATTGGAGATCTCTCCCAAAGCAAGCTGGATTGTTGAGGTGTGGCAAGAGTTGTCGTCTGCGATGGATTAATTACCTCAGACCTGATGTGAAACGTGGCAATTTCAGTGCAGAGGAAGAAGACACCATCATCAAACTTCACCAGAGCTTTGGTAACAAGTGGTCGAAGATTGCTTCTAAGCTGCCTGGAAGAACAGACAATGAGATCAAGAATGTGTGGCATACACATCTCAAGAAAAGATTGAGCTCGGAAACTAACCTTAATGCCGATGAAGCGGGTTCAAAAGGT…	MGKGRAPCCDKTKVKRGPWSHDEDLKLISFIHKNGHENWRSLPKQAGLLRCGKSCRLRWINYLRPDVKRGNFSAEEEDTIIKLHQSFGNKWSKIASKLPGRTDNEIKNVWHTHLKKRLSSETNLNADEAGSKGSLNEEENSQESSPNASMSFAGSNISSKDDDAQISQMFEHILTYSEFTGMLQEVDKPELLEMPFDLDPDIWSFIDGSDSFQQPENRALQESEEDEVDKWFKHLESELGLEENDNQQQQQQHKQGTEDEHSSSLLESYELLIH
AtMYB113	AT1G66370	ATGGGCGAATCACCCAAAGGGTTGAGAAAAGGTACATGGACTACTGAAGAAGATATTCTCTTGAGGCAATGCATTGATAAGTATGGAGAAGGCAAATGGCATCGAGTTCCTTTAAGAACTGGTCTCAATCGGTGCCGAAAGAGTTGTAGACTTAGATGGTTGAATTATTTGAAGCCAAGTATTAAGAGAGGAAAACTCTGCTCCGATGAAGTTGATCTTGTTCTTCGCCTTCATAAACTTCTAGGAAATAGGTGGTCCTTGATCGCTGGTAGATTGCCTGGTCGGACTGCTAATGATGTCAAGAATTACTGGAACACTCATTTGAGTAAGAAGCACGATGAACGATGCTGTAAGACGAAGATGATAAACAAAAACATTACTTCTCATCCTACTTCATCG…	MGESPKGLRKGTWTTEEDILLRQCIDKYGEGKWHRVPLRTGLNRCRKSCRLRWLNYLKPSIKRGKLCSDEVDLVLRLHKLLGNRWSLIAGRLPGRTANDVKNYWNTHLSKKHDERCCKTKMINKNITSHPTSSAQKIDVLKPRPRSFSDKNSCNDVNILPKVDVVPLHLGLNNNYVCESSITCNKDEQKDKLININLLDGDNMWWESLLEADVLGPEATETAKGVTLPLDFEQIWARFDEETLELN
AtMYB72	AT1G56160	ATGGGGAAAGGAAGAGCACCATGCTGCGACAAGAACAAAGTGAAGAGAGGGCCATGGAGCCCTCAAGAAGATCTCACTCTCATCACTTTTATTCAAAAACATGGCCATCAAAACTGGAGATCTCTTCCCAAGCTTGCTGGATTGTTGAGATGTGGGAAAAGTTGCCGACTAAGATGGATAAACTATCTGAGACCGGACGTGAAGCGAGGCAACTTTAGCAAAAAGGAGGAAGATGCTATCATTCACTACCATCAAACCCTTGGAAACAAGTGGTCAAAGATCGCGTCCTTCTTGCCGGGAAGAACTGACAACGAGATCAAAAACGTGTGGAACACGCATCTCAAGAAACGACTCACTCCATCTTCTTCTTCTTCATCCCTCTCTAGCACTCATGACCAA…	MGKGRAPCCDKNKVKRGPWSPQEDLTLITFIQKHGHQNWRSLPKLAGLLRCGKSCRLRWINYLRPDVKRGNFSKKEEDAIIHYHQTLGNKWSKIASFLPGRTDNEIKNVWNTHLKKRLTPSSSSSSLSSTHDQSTKADHDKNCDGAQEEIHSGLNESQNSATSSHHQGECMHTKPELHEVNGLNEIQFLLDHDDFDDITSEFLQDNDILFPLDSLLHNHQTHISTQEMTREVTKSQSFDHPQPDIPCGFEDTNEESDLRRQLVESTTPNNEYDEWFNFIDNQTYFDDFNFVGEVCL
AtMYB81	AT2G26960	ATGGGGAAAGTTCGTCAAGATTCAGGATCAGACGATGACAATTCAATAAAGAAATCTTTTACTAAAGGTCCTTGGACACAAGCAGAAGACAATCTTTTGATAGCTTACGTTGATAAACATGGTGATGGAAACTGGAACGCTGTTCAAAACAACTCGGGCCTTTCTCGTTGTGGTAAAAGTTGTCGCCTTCGTTGGGTAAATCATCTGAGACCAGATTTGAAAAAAGGCGCTTTTACAGAGAAAGAAGAGAAACGTGTCATCGAACTTCATGCTTTGTTAGGGAACAAATGGGCACGAATGGCTGAAGAACTACCGGGACGAACAGATAATGAGATCAAGAACTTCTGGAATACAAGACTTAAGAGACTGCAACGACTTGGTTTACCTGTTTACCCCGAT…	MGKVRQDSGSDDDNSIKKSFTKGPWTQAEDNLLIAYVDKHGDGNWNAVQNNSGLSRCGKSCRLRWVNHLRPDLKKGAFTEKEEKRVIELHALLGNKWARMAEELPGRTDNEIKNFWNTRLKRLQRLGLPVYPDEVREHAMNAATHSGLNTDSLDGHHSQEYMEADTVEIPEVDFEHLPLNRSSSYYQSMLRHVPPTNVFVRQKPCFFQPPNVYNLIPPSPYMSTGKRPREPETAFPCPGGYTMNEQSPRLWNYPFVENVSEQLPDSHLLGNAAYSSPPGPLVHGVENFEFPSFQYHEEPGGWGADQPNPMPEHESDNTLVQSPLTAQTPSDCPSSSLYDGLLESVVYGSSGEKPATDTDSESSLFQSFTPANENITGKTCFLTLYALHALHCLCNQFKK…
AtMYB10	AT3G12820	ATGGGGAATAGAAGAGCACCATGCTGTGACAAAAGCCAAGTGAAGAGAGGGCCATGGAGTGATGAAGAAAGTGAAAGACTCAGATCTTTTATCCTCAAAAATGGTCATCAAAATTGGCGATCTCTTCCCAAACTCGCTGGATTGATGAGATGCGGAAAGAGTTGTCGTCTAAGATGGATAAACTATCTGAGACCAGGTCTCAAACGAGGCAACTTCACCAAGGAGGAGGAAGATACCATTATCCACCTTCACCAAGCTTATGGAAACAAGTGGTCTAAGATCGCATCCAACTTCCCGGGAAGGACAGACAACGAGATCAAGAATGTATGGAACACTCATCTCAAGAAGCGGTTGGTGAAGAGGAGCATTTCATCATCATCATCCGATGTTACCAATCAT…	MGNRRAPCCDKSQVKRGPWSDEESERLRSFILKNGHQNWRSLPKLAGLMRCGKSCRLRWINYLRPGLKRGNFTKEEEDTIIHLHQAYGNKWSKIASNFPGRTDNEIKNVWNTHLKKRLVKRSISSSSSDVTNHSVSSTSSSSSSISSVLQDVIIKSERPNQEEEFGEILVEQMACGFEVDAPQSLECLFDDSQVPPPISKPDSLQTHGKSSDHEFWSRLIEPGFDDYNEWLIFLDNQTC
AtMYB13	AT1G06180	ATGGGGAGAAGACCATGCTGTGAGAAGATAGGATTGAAGAAAGGGCCATGGAGTGCTGAAGAAGATCGAATCTTGATCAATTATATTAGTCTCCATGGCCATCCCAATTGGAGAGCTCTCCCTAAACTAGCCGGGCTACTTCGGTGCGGAAAAAGTTGCAGGCTTCGTTGGATTAATTATTTGAGACCAGACATCAAACGTGGCAATTTCACTCCTCATGAAGAAGATACTATCATCAGCTTACATCAACTCTTAGGCAACAGATGGTCTGCGATAGCTGCAAAATTGCCTGGACGAACAGACAACGAAATTAAAAATGTTTGGCACACTCATTTAAAGAAAAGACTCCACCACAGTCAAGATCAAAACAACAAGGAAGATTTCGTCTCTACTACAGCT…	MGRRPCCEKIGLKKGPWSAEEDRILINYISLHGHPNWRALPKLAGLLRCGKSCRLRWINYLRPDIKRGNFTPHEEDTIISLHQLLGNRWSAIAAKLPGRTDNEIKNVWHTHLKKRLHHSQDQNNKEDFVSTTAAEMPTSPQQQSSSSADISAITTLGNNNDISNSNKDSATSSEDVLAIIDESFWSEVVLMDCDISGNEKNEKKIENWEGSLDRNDKGYNHDMEFWFDHLTSSSCIIGEMSDISEF
AtMYB85	AT4G22680	ATGGGGAGACAGCCATGCTGTGACAAGCTAGGGGTGAAGAAAGGGCCGTGGACGGTGGAGGAAGATAAGAAGCTTATAAACTTCATACTAACCAATGGCCATTGTTGCTGGCGTGCTTTGCCGAAGCTGGCCGGTCTCCGTCGCTGTGGAAAGAGCTGCCGCCTCCGGTGGACTAACTATCTCCGGCCTGACTTAAAACGAGGCCTTCTCTCGCATGATGAAGAACAACTTGTCATAGATCTTCATGCTAATCTCGGCAATAAGTGGTCTAAGATAGCTTCAAGATTACCTGGAAGAACAGATAACGAAATAAAAAACCATTGGAATACTCATATCAAGAAGAAACTTCTTAAGATGGGAATCGATCCTATGACCCATCAACCCCTAAATCAAGAACCT…	MGRQPCCDKLGVKKGPWTVEEDKKLINFILTNGHCCWRALPKLAGLRRCGKSCRLRWTNYLRPDLKRGLLSHDEEQLVIDLHANLGNKWSKIASRLPGRTDNEIKNHWNTHIKKKLLKMGIDPMTHQPLNQEPSNIDNSKTIPSNPDDVSVEPKTTNTKYVEISVTTTEEESSSTVTDQNSSMDNENHLIDNIYDDDELFSYLWSDETTKDEASWSDSNFGVGGTLYDHNISGADADFPIWSPERINDEKMFLDYCQDFGVHDFGF
AtMYB61	AT1G09540	ATGGGGAGACATTCTTGCTGTTACAAACAAAAGCTGAGGAAAGGGCTTTGGTCTCCTGAAGAAGACGAGAAGCTTCTTACTCACATCACCAATCACGGCCATGGCTGCTGGAGCTCTGTCCCTAAACTCGCTGGTTTGCAGAGATGTGGGAAGAGTTGTCGACTAAGATGGATCAATTACTTGAGACCTGATTTAAAGAGAGGAGCTTTTTCTCCTGAAGAAGAGAATCTCATCGTCGAACTTCATGCCGTCCTTGGAAACAGATGGTCACAGATTGCGTCAAGGCTTCCGGGTAGAACCGACAACGAGATCAAGAATCTATGGAACTCAAGCATCAAGAAGAAACTGAAACAAAGAGGCATTGACCCAAACACACACAAGCCCATCTCTGAAGTTGAG…	MGRHSCCYKQKLRKGLWSPEEDEKLLTHITNHGHGCWSSVPKLAGLQRCGKSCRLRWINYLRPDLKRGAFSPEEENLIVELHAVLGNRWSQIASRLPGRTDNEIKNLWNSSIKKKLKQRGIDPNTHKPISEVESFSDKDKPTTSNNKRSGNDHKSPSSSSATNQDFFLERPSDLSDYFGFQKLNFNSNLGLSVTTDSSLCSMIPPQFSPGNMVGSVLQTPVCVKPSISLPPDNNSSSPISGGDHVKLAAPNWEFQTNNNNTSNFFDNGGFSWSIPNSSTSSSQVKPNHNFEEIKWSEYLNTPFFIGSTVQSQTSQPIYIKSETDYLANVSNMTDPWSQNENLGTTETSDVFSKDLQRMAVSFGQSL
AtMYB47	AT1G18710	ATGGGGAGGACGACATGGTTCGACGTCGACGGGATGAAGAAAGGAGAGTGGACGGCAGAGGAAGACCAGAAGCTCGGCGCTTACATCAACGAGCATGGCGTTTGTGATTGGCGTTCCCTCCCCAAAAGAGCTGGTTTGCAGAGATGTGGAAAGAGCTGCAGATTAAGGTGGCTTAACTATCTAAAGCCTGGGATTAGAAGAGGCAAATTCACTCCTCAAGAAGAAGAAGAAATCATCCAACTTCATGCTGTTCTCGGAAACAGGTGGGCAGCCATGGCGAAGAAGATGCAGAATCGAACAGACAATGATATCAAGAACCATTGGAACTCTTGTCTCAAGAAAAGACTTTCGAGAAAGGGAATCGACCCTATGACCCACGAGCCCATCATCAAACACCTC…	MGRTTWFDVDGMKKGEWTAEEDQKLGAYINEHGVCDWRSLPKRAGLQRCGKSCRLRWLNYLKPGIRRGKFTPQEEEEIIQLHAVLGNRWAAMAKKMQNRTDNDIKNHWNSCLKKRLSRKGIDPMTHEPIIKHLTVNTTNADCGNSSTTTSPSTTESSPSSGSSRLLNKLAAGISSRQHSLDRIKYILSNSIIESSDQAKEEEEKEEEEEERDSMMGQKIDGSEGEDIQIWGEEEVRRLMEIDAMDMYEMTSYDAVMYESSHILDHLF
AtMYB95	AT1G74430	ATGGGGAGGACGACGTGGTTCGACGTTGACGGGTTGAGGAAAGGAGAGTGGACGGCGGAGGAAGACCGGAAGCTCGTGGTTTACATCAACGAACACGGTCTAGGCGAGTGGGGTTCACTGCCTAAGAGAGCCGGTCTACAAAGATGTGGAAAGAGTTGTAGATTAAGATGGCTGAATTATTTGAGGCCTGGGATTAAAAGAGGCAAGTTCACTCCTCAGGAAGAAGAAGAAATCATCAAATACCATGCTCTTCTTGGAAACAGGTGGGCAGCAATAGCTAAGCAAATGCCAAACAGAACAGATAATGACATAAAGAACCATTGGAACTCATGCCTTAAGAAAAGACTTGCTAAAAAAGGAATCGATCCAATGACCCATGAGCCAACAACAACAACAAGC…	MGRTTWFDVDGLRKGEWTAEEDRKLVVYINEHGLGEWGSLPKRAGLQRCGKSCRLRWLNYLRPGIKRGKFTPQEEEEIIKYHALLGNRWAAIAKQMPNRTDNDIKNHWNSCLKKRLAKKGIDPMTHEPTTTTSLTVDVTSSSTTSSPTPSPTSSSFSSCSSTGSARFLNKLAAGISSRKHGLESIKTVILAEQPREAVDEEKMMTINMKEKELISCYMEIDETMSIDELPCDDSTSGFVAFDDYSLIDPYRDGVYVSDFYDETEHLDLFLL
AtMYB93	AT1G34670	ATGGGGAGGTCGCCTTGTTGCGACGAGAATGGTCTAAAGAAAGGGCCATGGACTCCTGAAGAAGATCAAAAGCTTATTGATTACATTCATAAACATGGTCATGGAAGCTGGAGAGCTCTCCCCAAGCTCGCAGATTTGAATAGGTGTGGAAAGAGTTGTAGACTGAGGTGGACAAATTATTTGAGACCAGACATCAAAAGAGGAAAGTTTTCAGCCGAAGAAGAGCAAACAATCCTCCATCTCCACTCCATTCTCGGGAATAAATGGTCAGCTATTGCGACGCATTTGCAAGGTCGTACAGATAATGAGATAAAAAACTTTTGGAACACACATCTAAAGAAGAAATTGATCCAGATGGGGATCGATCCTGTGACTCATCAGCCAAGAACCGACCTCTTC…	MGRSPCCDENGLKKGPWTPEEDQKLIDYIHKHGHGSWRALPKLADLNRCGKSCRLRWTNYLRPDIKRGKFSAEEEQTILHLHSILGNKWSAIATHLQGRTDNEIKNFWNTHLKKKLIQMGIDPVTHQPRTDLFASLPQLIALANLKDLIEQTSQFSSMQGEAAQLANLQYLQRMFNSSASLTNNNGNNFSPSSILDIDQHHAMNLLNSMVSWNKDQNPAFDPVLELEANDQNQDLFPLGFIIDQPTQPLQQQKYHLNNSPSELPSQGDPLLDHVPFSLQTPLNSEDHFIDNLVKHPTDHEHEHDDNPSSWVLPSLIDNNPKTVTSSLPHNNPADASSSSSYGGCEAASFYWPDICFDESLMNVIS
AtMYB9	AT5G16770	ATGGGGCGATCACCATGTTGCGATGAGAATGGTCTAAAGAAAGGGCCATGGACACAAGAGGAGGATGATAAACTGATAGATCACATTCAAAAACATGGCCATGGCAGCTGGAGAGCTCTTCCAAAGCAAGCCGGTTTAAACCGATGCGGAAAGAGTTGTAGATTAAGATGGACCAACTACTTGAGACCTGACATCAAGAGAGGAAATTTCACTGAAGAGGAAGAACAAACTATTATCAACCTCCATTCCCTTCTTGGAAACAAGTGGTCGTCGATAGCCGGTAATCTTCCTGGAAGAACGGACAATGAAATAAAAAACTATTGGAACACACATTTGAGAAAGAAACTTCTCCAAATGGGGATTGATCCGGTGACCCATAGGCCAAGAACCGACCATCTA…	MGRSPCCDENGLKKGPWTQEEDDKLIDHIQKHGHGSWRALPKQAGLNRCGKSCRLRWTNYLRPDIKRGNFTEEEEQTIINLHSLLGNKWSSIAGNLPGRTDNEIKNYWNTHLRKKLLQMGIDPVTHRPRTDHLNVLAALPQLIAAANFNSLLNLNQNVQLDATTLAKAQLLHTMIQVLSTNNNTTNPSFSSSTMQNSNTNLFGQASYLENQNLFGQSQNFSHILEDENLMVKTQIIDNPLDSFSSPIQPGFQDDHNSLPLLVPASPEESKETQRMIKNKDIVDYHHHDASNPSSSNSTFTQDHHHPWCDTIDDGASDSFWKEIIEQTCSEPWPFPE
AtMYB31	AT1G74650	ATGGGTAGACCACCTTGTTGCGAGAAGATTGAGGTGAAGAAAGGACCATGGACTCCCGAAGAAGACATAATCTTGGTCTCTTATATCCAACAACACGGCCCTGGAAATTGGAGATCTGTCCCTGCAAACACCGGTTTGCTAAGGTGTAGCAAGAGTTGCAGACTTAGATGGACTAATTACCTTCGTCCCGGGATCAAACGAGGAAATTTCACTCAACCGGAAGAGAAGATGATCATCCACCTTCAAGCTCTTTTGGGAAATAGATGGGCAGCTATAGCATCATATCTACCTCAGAGGACCGACAATGATATCAAGAACTACTGGAACACTCATCTTAAAAAGAAACTAGTGATGATGAAGTTTCAAAATGGTATCATCAACGAAAACAAAACCAATCTG…	MGRPPCCEKIEVKKGPWTPEEDIILVSYIQQHGPGNWRSVPANTGLLRCSKSCRLRWTNYLRPGIKRGNFTQPEEKMIIHLQALLGNRWAAIASYLPQRTDNDIKNYWNTHLKKKLVMMKFQNGIINENKTNLATDISSCNNNNNGCNHNKRTTNKGQWEKKLQTDINMAKQALFQALSLDQPSSLIPPDPDSPKPHHHSTTTYASSTDNISKLLQNWTSSSSSKPNTSSVSNNRSSSPGEGGLFDHHSLFSSNSESGSVDEKLNLMSETSMFKGESKPDIDMEATPTTTTTDDQGSLSLIEKWLFDDQGLVQCDDSQEDLIDVSLEELK
AtMYB16	AT5G15310	ATGGGTAGATCACCGTGTTGTGACAAATTGGGTTTGAAGAAAGGACCTTGGACACCAGAGGAGGATCAGAAACTTTTAGCTTATATTGAAGAACATGGTCATGGAAGTTGGCGTTCATTGCCTGAGAAAGCTGGTCTCCATCGATGCGGAAAGAGTTGTAGACTAAGATGGACTAACTACCTAAGACCTGACATCAAAAGAGGCAAATTCAACTTACAAGAAGAACAAACCATTATCCAACTCCATGCTCTGTTAGGAAACAGATGGTCAGCGATTGCTACTCATTTGCCAAAGAGAACAGACAACGAGATCAAGAACTATTGGAACACTCATTTGAAGAAACGGTTAGTGAAAATGGGGATTGATCCAGTGACTCATAAACCCAAAAACGAGACTCCT…	MGRSPCCDKLGLKKGPWTPEEDQKLLAYIEEHGHGSWRSLPEKAGLHRCGKSCRLRWTNYLRPDIKRGKFNLQEEQTIIQLHALLGNRWSAIATHLPKRTDNEIKNYWNTHLKKRLVKMGIDPVTHKPKNETPLSSLGLSKNAAILSHTAQWESARLEAEARLARESKLLHLQHYQTKTSSQPHHHHGFTHKSLLPNWTTKPHEDQQQLESPTSTVSFSEMKESIPAKIEFVGSSTGVTLMKEPEHDWINSTMHEFETTQMGEGIEEGFTGLLLGGDSIDRSFSGDKNETAGESSGGDCNYYEDNKNYLDSIFNFVDPSPSDSPMF
AtMYB60	AT1G08810	ATGGGTAGGCCTCCATGCTGTGACAAGATAGGGATCAAGAAAGGACCATGGACTCCTGAAGAAGATATCATTCTTGTTTCTTACATTCAAGAACATGGTCCTGGAAACTGGAGATCAGTTCCCACCAACACTGGGTTATTGAGATGCAGCAAAAGTTGTAGACTGAGATGGACAAATTATCTGAGACCTGGAATTAAACGTGGAAACTTTACTCCTCATGAAGAAGGAATGATCATTCACTTGCAAGCCTTATTGGGTAACAAATGGGCGTCCATAGCTTCATACCTACCACAAAGAACGGACAATGATATCAAGAACTACTGGAACACACATTTAAAGAAGAAGCTCAACAAGTCTGACAGTGATGAGAGGAGCAGATCAGAGAACATTGCGCTGCAA…	MGRPPCCDKIGIKKGPWTPEEDIILVSYIQEHGPGNWRSVPTNTGLLRCSKSCRLRWTNYLRPGIKRGNFTPHEEGMIIHLQALLGNKWASIASYLPQRTDNDIKNYWNTHLKKKLNKSDSDERSRSENIALQTSSTRNTINHRSTYASSTENISRLLEGWMRASPKSSTSTTFLEHKMQNRTNNFIDHHSDQFPYEQLQGSWEEGHSKGINGDDDQGIKNSENNNGDDVHHEDGDHEDDDDHNATPPLTFIEKWLLEETSTTGGQMEEMSHLMELSNML
AtMYB38	AT2G36890	ATGGGTAGGGCTCCATGTTGTGACAAGGCAAATGTGAAGAGAGGTCCATGGTCTCCTGAAGAAGACGCAAAGCTTAAAGATTACATCGAGAAACAAGGAACTGGTGGCAATTGGATTGCTCTCCCTCACAAAGCTGGTTTAAGGAGATGTGGGAAGAGTTGCAGACTGAGATGGTTAAATTATTTGAGACCAAACATAAGACATGGAGATTTCACTGAAGAAGAAGACAATATTATCTACAGCCTCTTTGCCTCCATTGGAAGCAGGTGGTCAGTAATAGCAGCTCACTTGCAAGGTAGAACTGATAATGACATCAAGAACTATTGGAACACTAAGCTCAAGAAGAAGCTCATAGCCACCATGGCTCCTCCTCCACATCACCACTTAGCCATTGCTACA…	MGRAPCCDKANVKRGPWSPEEDAKLKDYIEKQGTGGNWIALPHKAGLRRCGKSCRLRWLNYLRPNIRHGDFTEEEDNIIYSLFASIGSRWSVIAAHLQGRTDNDIKNYWNTKLKKKLIATMAPPPHHHLAIATSSSSASPSSSSHYNMINSLLPYNPSTNQLLTPHQGIMMTMMGQQQQLFYQEDMGNLVNSPNRNNLIMSHQEDNQEQSTNKGIMLLSDVRSGSSTTSTVTRVKMEHRDHDDHHHHHEEDERSMTSVVMEDYGMEEIKQLISSSCTSSNNSLWFDENKTEDKFMLYY
AtMYB26	AT3G13890	ATGGGTCATCACTCATGCTGCAACAAGCAAAAGGTGAAGAGAGGGCTTTGGTCACCTGAAGAAGACGAAAAGCTCATCAACTACATCAATTCATATGGCCATGGATGTTGGAGCTCTGTTCCTAAACATGCAGGCACTTATACACATATACATGGGTTTTGTTTGCAGAGATGTGGAAAGAGTTGTAGATTAAGATGGATAAATTATCTAAGACCTGATCTTAAACGTGGAAGCTTCTCTCCTCAAGAAGCTGCTCTTATCATTGAGCTTCACAGCATTCTTGGTAACAGATGGGCTCAAATTGCTAAACATCTACCTGGAAGAACAGATAACGAGGTCAAGAATTTCTGGAACTCGAGCATTAAAAAGAAGCTCATGTCTCACCATCATCACGGTCAT…	MGHHSCCNKQKVKRGLWSPEEDEKLINYINSYGHGCWSSVPKHAGTYTHIHGFCLQRCGKSCRLRWINYLRPDLKRGSFSPQEAALIIELHSILGNRWAQIAKHLPGRTDNEVKNFWNSSIKKKLMSHHHHGHHHHHLSSMASLLTNLPYHNGFNPTTVDDESSRFMSNIITNTNPNFITPSHLSLPSPHVMTPLMFPTSREGDFKFLTTNNPNQSHHHDNNHYNNLDILSPTPTINNHHQPSLSSCPHDNNLQWPALPDFPASTISGFQETLQDYDDANKLNVFVTPFNDNAKKLLCGEVLEGKVLSSSSPISQDHGLFLPTTYNFQMTSTSDHQHHHRVDSYINHMIIPSSSSSSPISCGQYVIT
AtMYB80	AT5G56110	ATGGGTCGGATTCCATGTTGTGAAAAGGAGAATGTGAAGAGAGGACAATGGACTCCTGAAGAAGACAACAAATTGGCTTCTTATATTGCTCAACATGGTACTCGTAATTGGCGTCTCATCCCTAAGAATGCTGGGTTGCAAAGATGTGGGAAGAGTTGTAGGCTGCGATGGACAAACTATCTGCGTCCGGATTTGAAACATGGCCAGTTCTCGGAGGCTGAAGAACATATCATTGTCAAGTTTCACTCTGTTCTTGGTAACCGGTGGTCGTTGATTGCGGCGCAACTTCCTGGTCGGACAGACAACGATGTGAAAAATTATTGGAACACGAAGCTGAAGAAGAAGTTGTCAGGAATGGGAATAGATCCGGTGACCCACAAGCCTTTCTCGCATCTAATG…	MGRIPCCEKENVKRGQWTPEEDNKLASYIAQHGTRNWRLIPKNAGLQRCGKSCRLRWTNYLRPDLKHGQFSEAEEHIIVKFHSVLGNRWSLIAAQLPGRTDNDVKNYWNTKLKKKLSGMGIDPVTHKPFSHLMAEITTTLNPPQVSHLAEAALGCFKDEMLHLLTKKRVDLNQINFSNHNPNPNNFHEIADNEAGKIKMDGLDHGNGIMKLWDMGNGFSYGSSSSSFGNEERNDGSASPAVAAWRGHGGIRTAVAETAAAEEEERRKLKGEVVDQEEIGSEGGRGDGMTMMRNHHHHQHVFNVDNVLWDLQADDLINHMV
AtMYB22	AT5G40430	ATGGGTGAACCTCAATTATTTGATGTGCCAGTGCTAGAAGGTATCAAAAATACAACCAACGAAATCATGAATCAACTTGAAGATGATAAGATGAAAAAAACTTATGAGAATAAAAAGGAGGCGAGCACAAGCAAATATTTGAAGAAAAGTGACATCACCAAAAAAAGATGGACAGAATCTGAGGACATAAAATTGAAAGAGATGGTGGCACTTGAACCCAAAAAATGGACAAAGGTCGCAAAACATTTTGAAGGACGAACACCAAAACAATGCAGAGAGAGGTGGCATAACCATGCTCGTCCTAACGTTAAGAAAACTACTTGGAGTGAAGAAGAAGATCAAATACTAATTGAAGTACACAAAGTAATTGGTGCCAAATGGATCCAGATCTCAGAGCAA…	MGEPQLFDVPVLEGIKNTTNEIMNQLEDDKMKKTYENKKEASTSKYLKKSDITKKRWTESEDIKLKEMVALEPKKWTKVAKHFEGRTPKQCRERWHNHARPNVKKTTWSEEEDQILIEVHKVIGAKWIQISEQLPGRSYNNVKNHWNTTKRRVQNKSGRTVNRVGNNILENYIRSITINNDDESDGEPTNIENYHDDSEDMLYGEMNLSPEAITQTTKPLTDASTISPYIPMPKENYTLEVCESLEDYLELLRWWD
AtMYB78	AT5G49620	ATGGGTGACAAAGGAAGGAGCTTAAAGATCAACAAGAACATGGAGGAATTCACGAAAGTGGAAGAAGAAATGGACGTAAGGAGAGGTCCATGGACAGTTGAGGAAGATTTAGAGCTCATCAATTACATTGCTAGTCATGGTGAAGGTCGATGGAACTCTCTCGCTCGTTGCGCCGAACTCAAAAGGACCGGAAAAAGCTGCAGACTTCGGTGGCTGAACTATCTCCGACCAGATGTGCGCCGTGGAAACATAACCCTCGAAGAACAACTCTTGATTCTTGAACTTCACACACGTTGGGGCAATAGTAATGAATTTGATCACAAGTTTTCTTCTTCTTGTGAGGACAGATGGTCTAAGATTGCACAATATTTACCAGGAAGAACGGATAACGAGATCAAA…	MGDKGRSLKINKNMEEFTKVEEEMDVRRGPWTVEEDLELINYIASHGEGRWNSLARCAELKRTGKSCRLRWLNYLRPDVRRGNITLEEQLLILELHTRWGNRWSKIAQYLPGRTDNEIKNYWRTRVQKHAKQLKCDVNSQQFKDTMKYLWMPRLVERIQAASIGSVSMSSCVTTSSDQFVINNNNTNNVDNLALMSNPNGYITPDNSSVAVSPVSDLTECQVSSEVWKIGQDENLVDPKMTSPNYMDNSSGLLNGDFTKMQDQSDLNWFENINGMVPNYSDSFWNIGNDEDFWLLQQHQQVHDNGSF
AtMYB99	AT5G62320	ATGGGTGGTCGTAAACCATGTTGTGATGAGGTTGGATTAAGAAAGGGTCCATGGACAGTGGAAGAAGATGGGAAACTAGTTGATTTCTTAAGGGCACGTGGCAACTGCGGTGGTGGTGGAGGAGGATGGTGCTGGAGAGACGTGCCAAAACTGGCGGGGCTAAGGAGGTGTGGCAAAAGTTGCCGTCTCCGGTGGACTAATTATCTCCGGCCAGATCTCAAGAGAGGTCTTTTTACTGAAGAAGAAATCCAACTAGTCATTGATCTTCATGCTCGCCTTGGCAATAGATGGTCGAAGATTGCAGTGGAGTTACCAGGAAGAACAGACAACGATATCAAAAATTATTGGAACACTCATATAAAGAGGAAGCTTATAAGAATGGGTATTGATCCAAACACA…	MGGRKPCCDEVGLRKGPWTVEEDGKLVDFLRARGNCGGGGGGWCWRDVPKLAGLRRCGKSCRLRWTNYLRPDLKRGLFTEEEIQLVIDLHARLGNRWSKIAVELPGRTDNDIKNYWNTHIKRKLIRMGIDPNTHRRFDQQKVNEEETILVNDPKPLSETEVSVALKNDTSAVLSGNLNQLADVDGDDQPWSFLMENDEGGGGDAAGELTMLLSGDITSSCSSSSSLWMKYGEFGYEDLELGCFDV
AtMYB122	AT1G74080	ATGGTACGGACGCCGTGTTGTAGAGCAGAAGGGTTGAAGAAAGGAGCATGGACTCAAGAAGAAGACCAAAAGCTTATCGCCTATGTTCAACGACATGGTGAAGGCGGTTGGCGAACCCTTCCGGACAAAGCTGGACTCAAAAGATGTGGCAAAAGCTGCAGATTGAGATGGGCGAATTACTTAAGACCTGACATTAAACGTGGAGAGTTTAGCCAAGACGAGGAAGATTCCATCATCAACCTCCACGCCATTCATGGCAACAAATGGTCGGCCATAGCTCGTAAAATACCAAGAAGAACAGACAATGAGATCAAGAACCATTGGAACACTCACATCAAGAAATGTCTGGTCAAGAAAGGTATTGATCCGTTGACCCACAAATCCCTTCTCGATGGAGCC…	MVRTPCCRAEGLKKGAWTQEEDQKLIAYVQRHGEGGWRTLPDKAGLKRCGKSCRLRWANYLRPDIKRGEFSQDEEDSIINLHAIHGNKWSAIARKIPRRTDNEIKNHWNTHIKKCLVKKGIDPLTHKSLLDGAGKSSDHSAHPEKSSVHDDKDDQNSNNKKLSGSSSARFLNRVANRFGHRINHNVLSDIIGSNGLLTSHTTPTTSVSEGERSTSSSSTHTSSNLPINRSITVDATSLSSSTFSDSPDPCLYEEIVGDIEDMTRFSSRCLSHVLSHEDLLMSVESCLENTSFMREITMIFQEDKIETTSFNDSYVTPINEVDDSCEGIDNYFG
AtMYB34	AT5G60890	ATGGTGAGGACACCATGTTGCAAAGAAGAAGGAATAAAGAAAGGAGCTTGGACTCCTGAGGAAGATCAAAAGCTTATTGCTTATCTTCACCTACATGGTGAAGGTGGATGGCGTACTCTCCCTGAAAAAGCTGGATTGAAGAGATGTGGAAAGAGTTGTAGATTGAGATGGGCTAATTACTTAAGACCCGACATTAAGAGAGGAGAGTTTAGTCCTGAAGAAGACGACACTATCATCAAGCTTCATGCTCTTAAGGGTAACAAGTGGGCCGCAATCGCCACTAGCTTGGCGGGACGAACTGACAACGAAATAAAAAACTATTGGAACACAAATCTCAAGAAGCGGTTGAAGCAAAAAGGCATCGATGCAATCACTCACAAACCGATCAATTCAACCGGT…	MVRTPCCKEEGIKKGAWTPEEDQKLIAYLHLHGEGGWRTLPEKAGLKRCGKSCRLRWANYLRPDIKRGEFSPEEDDTIIKLHALKGNKWAAIATSLAGRTDNEIKNYWNTNLKKRLKQKGIDAITHKPINSTGQTGFEPKVNKPVYSSGSARLLNRVASKYAVELNRDLLTGIISGNSTVAEDSQNSGDVDSPTSTLLNKMAATSVLINTTTTYSGFSDNCSFTDEFNEFFNNEEISDIYTTVDNFGFMEELKSILSYGDASAGVIENSPEVNVADAMEFIDSWNEDDNMVGVFV
AtMYB30	AT3G28910	ATGGTGAGGCCTCCTTGTTGTGACAAAGGAGGAGTGAAGAAAGGGCCATGGACTCCTGAAGAAGATATCATTTTAGTCACTTACATCCAAGAACATGGTCCTGGTAATTGGAGAGCTGTTCCTACCAATACTGGGCTGCTTAGATGCAGCAAGAGTTGTAGACTTAGATGGACAAACTATTTAAGGCCAGGAATCAAAAGAGGCAATTTCACAGAACATGAAGAAAAGATGATTGTTCATCTCCAAGCCCTCTTAGGAAATAGATGGGCTGCAATTGCGTCATATCTTCCACAAAGGACAGACAATGACATTAAGAACTATTGGAACACTCATTTGAAGAAGAAACTCAACAAAGTCAATCAAGATTCTCATCAAGAACTTGACCGTTCCTCGCTCTCA…	MVRPPCCDKGGVKKGPWTPEEDIILVTYIQEHGPGNWRAVPTNTGLLRCSKSCRLRWTNYLRPGIKRGNFTEHEEKMIVHLQALLGNRWAAIASYLPQRTDNDIKNYWNTHLKKKLNKVNQDSHQELDRSSLSSSPSSSSANSNSNISRGQWERRLQTDIHLAKKALSEALSPAVAPIITSTVTTTSSSAESRRSTSSASGFLRTQETSTTYASSTENIAKLLKGWVKNSPKTQNSADQIASTEVKEVIKSDDGKECAGAFQSFSEFDHSYQQAGVSPDHETKPDITGCCSNQSQWSLFEKWLFEDSGGQIGDILLDENTNFF
AtMYB79	AT4G13480	ATGGTGGAAGAAGTTTGGAGAAAGGGTCCATGGACCGCCGAAGAAGACCGTCTTTTGATCGAATACGTCCGTGTTCACGGTGAAGGTCGTTGGAACTCTGTCTCTAAACTCGCAGGATTGAAAAGGAATGGCAAAAGCTGCAGACTAAGATGGGTGAATTACCTTAGACCAGACCTCAAGAGAGGACAGATCACTCCACATGAAGAAAGTATAATACTTGAGCTACACGCTAAGTGGGGAAATAGGTGGTCAACAATTGCACGTAGTTTACCAGGAAGAACAGACAATGAGATCAAGAACTATTGGAGAACCCATTTCAAGAAAAAGGCAAAGCCTACGACTAACAATGCGGAGAAGATAAAGAGTCGTCTCCTAAAAAGGCAACACTTCAAGGAACAG…	MVEEVWRKGPWTAEEDRLLIEYVRVHGEGRWNSVSKLAGLKRNGKSCRLRWVNYLRPDLKRGQITPHEESIILELHAKWGNRWSTIARSLPGRTDNEIKNYWRTHFKKKAKPTTNNAEKIKSRLLKRQHFKEQREIELQQEQQLFQFDQLGMKKIISLLEENNSSSSSDGGGDVFYYPDQITHSSKPFGYNSNSLEEQLQGRFSPVNIPDANTMNEDNAIWDGFWNMDVVNGHGGNLGVVAATAACGPRKPYFHNLVIPFC
AtMYB45	AT3G48920	ATGGTGTTTAAATCAGAAAAATCAAACCGGGAAATGAAATCAAAGGAGAAGCAAAGGAAGGGATTATGGTCACCCGAGGAAGATGAGAAGCTTAGGAGTCATGTCCTCAAATATGGCCATGGATGCTGGAGTACTATTCCTCTTCAAGCTGGATTGCAGAGGAATGGGAAGAGTTGTAGATTAAGGTGGGTTAATTATTTAAGACCTGGACTTAAGAAGTCTTTATTCACTAAACAAGAGGAAACTATACTTCTTTCACTTCATTCCATGTTGGGTAACAAATGGTCTCAGATATCGAAATTCTTACCAGGAAGAACCGACAACGAGATCAAAAACTATTGGCATTCTAATCTAAAGAAGGGTGTAACTTTGAAACAACATGAAACCACAAAAAAACAT…	MVFKSEKSNREMKSKEKQRKGLWSPEEDEKLRSHVLKYGHGCWSTIPLQAGLQRNGKSCRLRWVNYLRPGLKKSLFTKQEETILLSLHSMLGNKWSQISKFLPGRTDNEIKNYWHSNLKKGVTLKQHETTKKHQTPLITNSLEALQSSTERSSSSINVGETSNAQTSSFSPNLVFSEWLDHSLLMDQSPQKSSYVQNLVLPEERGFIGPCGPRYLGNDSLPDFVPNSEFLLDDEISSEIEFCTSFSDNFLFDGLINELRPM
AtMYB115	AT5G40360	ATGTATCACCAAAATCTGATTTCATCGACCCCAAACCAAAATTCTAATCCTCACGATTGGGATATTCAAAATCCTTTATTTTCCATACATCCTTCAGCTGAAATACCCTCAAAATATCCCTTTATGGGTATCACTTCTTGCCCAAACACCAATGTTTTTGAGGAATTTCAATATAAAATAACCAACGATCAAAACTTTCCAACGACCTATAACACCCCATTCCCTGTAATATCTGAAGGTATATCATACAATATGCATGATGTTCAAGAGAATACTATGTGTGGTTATACTGCTCACAATCAAGGGCTTATCATTGGTTGTCACGAGCCAGTTCTTGTTCATGCCGTGGTTGAGTCTCAGCAATTTAATGTCCCACAGTCAGAGGATATCAATTTAGTA…	MYHQNLISSTPNQNSNPHDWDIQNPLFSIHPSAEIPSKYPFMGITSCPNTNVFEEFQYKITNDQNFPTTYNTPFPVISEGISYNMHDVQENTMCGYTAHNQGLIIGCHEPVLVHAVVESQQFNVPQSEDINLVSQSERVTEDKVMFKTDHKKKDIIGKGQWTPTEDELLVRMVKSKGTKNWTSIAKMFQGRVGKQCRERWHNHLRPNIKKNDWSEEEDQILIEVHKIVGNKWTEIAKRLPGRSENIVKNHWNATKRRLHSVRTKRSDAFSPRNNALENYIRSITINNNALMNREVDSITANSEIDSTRCENIVDEVMNLNLHATTSVYVPEQAVLTWGYDFTKCYEPMDDTWMLMNGWN
AtMYB73	AT4G37260	ATGTCAAACCCGACCCGTAAGAATATGGAGAGGATTAAAGGTCCATGGAGTCCAGAAGAAGATGATCTGTTGCAGAGGCTTGTTCAGAAACATGGTCCGAGGAACTGGTCTTTGATTAGCAAATCAATCCCTGGACGTTCCGGCAAATCTTGTCGTCTCCGGTGGTGTAACCAGCTATCTCCGGAGGTAGAGCACCGTGCTTTTTCGCAGGAAGAAGACGAGACGATTATTCGAGCTCACGCTCGGTTTGGTAACAAGTGGGCTACGATCTCTCGTCTTCTCAATGGACGAACCGATAACGCTATCAAGAATCATTGGAACTCGACGCTGAAGCGAAAATGCAGCGTCGAAGGGCAAAGTTGTGATTTTGGTGGTAATGGAGGGTATGATGGTAATTTA…	MSNPTRKNMERIKGPWSPEEDDLLQRLVQKHGPRNWSLISKSIPGRSGKSCRLRWCNQLSPEVEHRAFSQEEDETIIRAHARFGNKWATISRLLNGRTDNAIKNHWNSTLKRKCSVEGQSCDFGGNGGYDGNLGEEQPLKRTASGGGGVSTGLYMSPGSPSGSDVSEQSSGGAHVFKPTVRSEVTASSSGEDPPTYLSLSLPWTDETVRVNEPVQLNQNTVMDGGYTAELFPVRKEEQVEVEEEEAKGISGGFGGEFMTVVQEMIRTEVRSYMADLQRGNVGGSSSGGGGGGSCMPQSVNSRRVGFREFIVNQIGIGKME
AtMYB76	AT5G07700	ATGTCAAAGAGACCATATTGTATCGGAGAAGGACTGAAGAAAGGAGCATGGACTACAGAAGAGGATAAAAAACTCATCTCTTATATCCACGACCACGGTGAAGGAGGCTGGCGTGACATTCCAGAAAAAGCTGGGCTGAAACGGTGTGGAAAGAGTTGTAGATTACGGTGGACTAACTATTTGAAACCAGATATCAAGAGAGGAGAGTTTAGCTATGAGGAAGAGCAGATTATCATCATGCTTCATGCATCTCGTGGCAATAAGTGGTCTGTCATAGCTAGACATTTGCCAAAAAGAACGGATAACGAGGTCAAAAACTATTGGAACACACATCTCAAGAAACGTTTAATCGATGATGGCATTGATCCCGTGACACACAAGCCACTAGCTTCTTCTAAC…	MSKRPYCIGEGLKKGAWTTEEDKKLISYIHDHGEGGWRDIPEKAGLKRCGKSCRLRWTNYLKPDIKRGEFSYEEEQIIIMLHASRGNKWSVIARHLPKRTDNEVKNYWNTHLKKRLIDDGIDPVTHKPLASSNPNPVEPMKFDFQKKSNQDEHSSQSSSTTPASLPLSSNLNSVKSKISSGETQIESGHVSCKKRFGRSSSTSRLLNKVAARASSIGNILSTSIEGTLRSPASSSGLPDSFSQSYEYMIDNKEDLGTSIDLNIPEYDFPQFLEQLINDDDENENIVGPEQDLLMSDFPSTFVDEDDILGDITSWSTYLLDHPNFMYESDQDSDEKNFL
AtMYB116	AT1G25340	ATGTCAAATATAACAAAGAAGAAGTGTAATGGAAATGAAGAGGGTGCAGAGCAGAGGAAAGGGCCTTGGACACTCGAGGAAGACACTCTTCTCACCAATTACATTTCCCATAACGGTGAAGGCCGATGGAATCTGCTCGCTAAATCTTCTGGGCTAAAGAGAGCAGGAAAAAGTTGTAGATTGAGATGGTTGAATTACCTTAAACCCGACATAAAGCGTGGGAATCTCACTCCTCAAGAACAACTTTTAATCCTTGAGCTCCATTCTAAATGGGGTAATAGGTGGTCAAAAATTTCGAAGTATTTACCAGGAAGAACAGACAACGATATCAAAAACTACTGGAGAACTAGAGTCCAGAAACAAGCACGCCAGCTCAACATAGATTCCAATAGCCACAAG…	MSNITKKKCNGNEEGAEQRKGPWTLEEDTLLTNYISHNGEGRWNLLAKSSGLKRAGKSCRLRWLNYLKPDIKRGNLTPQEQLLILELHSKWGNRWSKISKYLPGRTDNDIKNYWRTRVQKQARQLNIDSNSHKFIEVVRSFWFPRLINEIKDNSYTNNIKANAPDLLGPILRDSKDLGFNNMDCSTSMSEDLKKTSQFMDFSDLETTMSLEGSRGGSSQCVSEVYSSFPCLEEEYMVAVMGSSDISALHDCHVADSKYEDDVTQDLMWNMDDIWQFNEYAHFN
AtMYB28	AT5G61420	ATGTCAAGAAAGCCATGTTGCGTCGGAGAAGGCTTGAAGAAAGGAGCATGGACCACCGAGGAGGACAAGAAACTCATCTCTTACATCCACGACCACGGCGAGGGAGGCTGGCGCGACATTCCCCAAAAAGCTGGGTTGAAACGGTGTGGAAAGAGTTGTAGACTGCGATGGACCAACTACCTTAAACCTGAGATCAAAAGAGGCGAGTTTAGTTCAGAGGAAGAGCAGATTATCATCATGCTTCATGCTTCTCGTGGCAACAAGTGGTCGGTCATAGCGAGACATTTACCTAGAAGAACAGACAACGAGATCAAGAACTACTGGAACACGCATCTCAAAAAACGTTTGATGGAACAGGGTATTGATCCCGTGACTCACAAGCCACTGGCTTCTAGTTCC…	MLHASRGNKWSVIARHLPRRTDNEIKNYWNTHLKKRLMEQGIDPVTHKPLASSSNPTVDENLNSPNASSSDKQYSRSSSMPFLSRPPPSSCNMVSKVSELSSNDGTPIQGSSLSCKKRFKKSSSTSRLLNKVAAKATSIKDILSASMEGSLSATTISHASFFNGFTEQIRNEEDSSNTSLTNTLAEFDPFSPSSLYPEHEINATSDLNMDQDYDFSQFFEKFGGDNHNEENSMNDLLMSDVSQEVSSTSVDDQDNMVGNFEGWSNYLLDHTNFMYDTDSDSLEKHFI
AtMYB29	AT5G07690	ATGTCAAGAAAGCCATGTTGTGTGGGAGAAGGACTGAAGAAAGGAGCATGGACTGCCGAAGAAGACAAGAAACTCATCTCTTACATTCATGAACACGGTGAAGGAGGCTGGCGTGACATTCCCCAAAAAGCTGGACTAAAACGATGTGGAAAGAGTTGTAGATTGCGATGGGCTAACTATTTGAAACCTGACATCAAGAGAGGAGAGTTTAGCTATGAGGAGGAACAGATTATCATCATGCTACACGCTTCTCGCGGCAACAAGTGGTCAGTCATAGCGAGACATTTGCCCAAAAGAACAGATAACGAGATTAAGAACTACTGGAACACGCATCTCAAAAAGCTCCTGATCGATAAGGGAATCGATCCCGTGACCCACAAGCCACTTGCCTATGACTCA…	MSRKPCCVGEGLKKGAWTAEEDKKLISYIHEHGEGGWRDIPQKAGLKRCGKSCRLRWANYLKPDIKRGEFSYEEEQIIIMLHASRGNKWSVIARHLPKRTDNEIKNYWNTHLKKLLIDKGIDPVTHKPLAYDSNPDEQSQSGSISPKSLPPSSSKNVPEITSSDETPKYDASLSSKKRCFKRSSSTSKLLNKVAARASSMGTILGASIEGTLISSTPLSSCLNDDFSETSQFQMEEFDPFYQSSEHIIDHMKEDISINNSEYDFSQFLEQFSNNEGEEADNTGGGYNQDLLMSDVSSTSVDEDEMMQNITGWSNYLLDHSDFNYDTSQDYDDKNFI
AtMYB70	AT2G23290	ATGTCTGGTTCGACCCGGAAAGAAATGGATCGGATCAAAGGACCATGGAGTCCTGAAGAAGACGATCTGTTACAATCGTTGGTTCAGAAGCACGGACCAAGGAACTGGTCTCTGATAAGCAAATCAATCCCTGGACGTTCCGGTAAATCTTGCCGTCTCCGTTGGTGTAATCAGCTTTCTCCGGAGGTAGAGCACCGTGGATTCACGGCGGAGGAAGATGATACGATTATACTAGCGCACGCTCGGTTTGGTAACAAGTGGGCGACGATTGCACGGCTTCTCAATGGTCGCACTGATAACGCGATTAAGAATCACTGGAACTCAACGCTGAAGCGGAAATGTAGCGGCGGAGGCGGCGGAGGAGAGGAAGGGCAGAGTTGTGATTTCGGTGGTAATGGA…	MSGSTRKEMDRIKGPWSPEEDDLLQSLVQKHGPRNWSLISKSIPGRSGKSCRLRWCNQLSPEVEHRGFTAEEDDTIILAHARFGNKWATIARLLNGRTDNAIKNHWNSTLKRKCSGGGGGGEEGQSCDFGGNGGYDGNLTDEKPLKRRASGGGGVVVVTALSPTGSDVSEQSQSSGSVLPVSSSCHVFKPTARAGGVVIESSSPEEEEKDPMTCLRLSLPWVNESTTPPELFPVKREEEEEKEREISGLGGDFMTVVQEMIKTEVRSYMADLQLGNGGGAGGGASSCMVQGTNGRNVGFREFIGLGRIE
AtMYB40	AT5G14340	ATGTGTGATTTATTAGCTTGCCTTAGAAAAATTTCAATGGGGAGAAAACCGTGCTGTGACAAAATTGGATTGAAGAGAGGTCCATGGACTATAGAAGAAGATCATAGACTCATGAACTTCATTCTTAACAATGGCATCCACTGCTGGAGAATTGTCCCCAAACTCGCAGGTTTGTTGAGATGCGGGAAGAGCTGTAGATTGAGATGGATCAATTATTTGAGACCCGATCTCAAGAGAGGTGGTTTCACTGATGCTGAAGAAGATCGGATTATGGAACTTCACTCTCAACTTGGCAACCGGTGGTCTAAAATTGCCTCGCATTTCTCTGGTCGAACGGATAACGAGATCAAAAACCACTGGAATACGAAGATCAAGAAGAAGATGAAACATCTTGGGTTG…	MGRKPCCDKIGLKRGPWTIEEDHRLMNFILNNGIHCWRIVPKLAGLLRCGKSCRLRWINYLRPDLKRGGFTDAEEDRIMELHSQLGNRWSKIASHFSGRTDNEIKNHWNTKIKKKMKHLGLDPATHKPMNDITHQTDPNQDKKPNMCSTINEGEEIKDQTPKDDVITETTKTLMLSDNDEELVAKNCKILCAEEVDLESLFETQCNEISSSSFSSLCSNISRSESSSYLAEDSISLEQWDLDMTDPFVPWDLFANLDDNLFLL
AtMYB46	AT5G12870	CATCATTCTCCCTTCATCAAGTCTTCTCTCTTTTCTCTCTCTATTATAAAACAAACTTCACTCGTTCACATCAATGGATCCTTGAGAAAGACAAACAAATTGAAGAGAAATAATAACAATTAACTCAACCAAAAATATGAGGAAGCCAGAGGTAGCCATTGCAGCTAGTACTCACCAAGTAAAGAAGATGAAGAAGGGACTTTGGTCTCCTGAGGAAGACTCAAAGCTGATGCAATACATGTTAAGCAATGGACAAGGATGTTGGAGTGATGTTGCGAAAAACGCAGGACTTCAAAGATGTGGCAAAAGCTGCCGTCTTCGTTGGATCAACTATCTTCGTCCTGACCTCAAGCGTGGCGCTTTCTCTCCTCAAGAAGAGGATCTCATCATTCGCTTTCA…	MRKPEVAIAASTHQVKKMKKGLWSPEEDSKLMQYMLSNGQGCWSDVAKNAGLQRCGKSCRLRWINYLRPDLKRGAFSPQEEDLIIRFHSILGNRWSQIAARLPGRTDNEIKNFWNSTIKKRLKKMSDTSNLINNSSSSPNTASDSSSNSASSLDIKDIIGSFMSLQEQGFVNPSLTHIQTNNPFPTGNMISHPCNDDFTPYVDGIYGVNAGVQGELYFPPLECEEGDWYNANINNHLDELNTNGSGNAPEGMRPVEEFWDLDQLMNTEVPSFYFNFKQSI
AtMYB101	AT2G32460	ATGGATGGTGGTGGAGAGACGACGGCGACGGCTACGATGGAGGGGAGAGGGTTGAAGAAAGGGCCGTGGACAACGACGGAGGATGCGATCTTGACGGAGTACGTGAGAAAACACGGTGAAGGTAATTGGAACGCCGTGCAAAAGAACTCAGGTTTGCTCCGGTGTGGCAAAAGTTGCCGTCTACGGTGGGCGAATCATCTCCGGCCAAATCTAAAGAAAGGATCTTTTACTCCTGATGAAGAAAAGATCATCATCGACCTTCACGCTAAGCTTGGAAACAAATGGGCTCGTATGGCTTCTCAGTTACCTGGAAGAACAGACAATGAGATCAAGAACTATTGGAACACGAGGATGAAGAGAAGACAAAGAGCTGGTTTGCCTTTATACCCTCATGAGATT…	MDGGGETTATATMEGRGLKKGPWTTTEDAILTEYVRKHGEGNWNAVQKNSGLLRCGKSCRLRWANHLRPNLKKGSFTPDEEKIIIDLHAKLGNKWARMASQLPGRTDNEIKNYWNTRMKRRQRAGLPLYPHEIQHQGIDIDDEFEFDLTSFQFQNQDLDHNHQNMIQYTNSSNTSSSSSSFSSSSSQPSKRLRPDPLVSTNPGLNPIPDSSMDFQMFSLYNNSLENDNNQFGFSVPLSSSSSSNEVCNPNHILEYISENSDTRNTNKKDIDAMSYSSLLMGDLEIRSSSFPLGLDNSVLELPSNQRPTHSFSSSPIIDNGVHLEPPSGNSGLLDALLEESQALSRGGLFKDVRVSSSDLCEVQDKRVKMDFENLLIDHLNSSNHSSLGANPNIHNKYNE…
AtMYB103	AT1G63910	ATGGGTCATCACTCATGCTGCAACCAGCAAAAGGTGAAGAGAGGGCTTTGGTCACCGGAAGAAGATGAGAAGCTTATTAGATATATCACAACTCATGGCTATGGATGTTGGAGTGAAGTCCCTGAAAAAGCAGGGCTTCAAAGATGTGGAAAAAGTTGTAGATTGCGATGGATAAACTATCTTCGACCTGATATCAGGAGAGGAAGGTTCTCTCCAGAAGAAGAGAAATTGATCATAAGCCTTCATGGAGTTGTGGGAAACAGGTGGGCTCATATAGCTAGTCATTTACCGGGAAGAACAGATAACGAGATTAAAAACTATTGGAATTCATGGATTAAGAAAAAGATACGAAAACCGCACCATCATTACAGTCGTCATCAACCGTCAGTAACTACTGTG…	MGHHSCCNQQKVKRGLWSPEEDEKLIRYITTHGYGCWSEVPEKAGLQRCGKSCRLRWINYLRPDIRRGRFSPEEEKLIISLHGVVGNRWAHIASHLPGRTDNEIKNYWNSWIKKKIRKPHHHYSRHQPSVTTVTLNADTTSIATTIEASTTTTSTIDNLHFDGFTDSPNQLNFTNDQETNIKIQETFFSHKPPLFMVDTTLPILEGMFSENIITNNNKNNDHDDTQRGGRENVCEQAFLTTNTEEWDMNLRQQEPFQVPTLASHVFNNSSNSNIDTVISYNLPALIEGNVDNIVHNENSNVQDGEMASTFECLKRQELSYDQWDDSQQCSNFFFWDNLNINVEGSSLVGNQDPSMNLGSSALSSSFPSSF
AtMYB104	AT2G26950	ATGATTCAGGATCAAGCGAATGATTTATTAGCAATGAAGAAAACTTTTACTAAGTCTAAATGGAAACCAGAGGAAGATAGAATTTTGAAAGATTATGTTATTCAATATGGTGATAGAACTTGGACTCATGTTCCAAAACGCACGGGCCTTCCTCATAATCCTGCAAGTTGTCGTTTTCGTTGGATGAATCATCTTAAGCCAAGCTTGAAAAAAGGGCCCTTTACCGATGAGGAAGAGAAGCGTGTTCTCCAACTTCATGCTGTTTTGGGGAACAAATGGTCACAAATGGCTAGAGAATTCCCTGGTCGAACAGATAACGAGATAAAGAATTTTTGGAACGCAAGACGTATGCGATTGAAAGGAAAGGGTTTACCAGTTTACCCTGATGAAGTTCGAGAG…	MIQDQANDLLAMKKTFTKSKWKPEEDRILKDYVIQYGDRTWTHVPKRTGLPHNPASCRFRWMNHLKPSLKKGPFTDEEEKRVLQLHAVLGNKWSQMAREFPGRTDNEIKNFWNARRMRLKGKGLPVYPDEVREQAIRTAAQYGVKVELLNAHYSQDSLMAGNVEKPQELNNLALNQCSPYYQSTLANVQPSRNRVMEPETTFPFTGGSAMNEQNPTLLCNPYVESTQEQLPDSHLFGNVTYSSPPMPLIHEVENLELPSFQGFDFHEEPSSFGAEQYNPMLNLEPHNTLVQSPLIGQTPTDFPSSFYDELLDELLESVVNGSLGEIPKTDTSSESQLFQSSLRSHTDATPDIANTTGYVGSNERNTTNDDDWIRLLLDEGFI
AtMYB105	AT1G69560	ATGGAGATGGTGCATGCTGACGTGGCGTCTCTCTCCATAACACCTTGCTTCCCGTCTTCTTTGTCTTCGTCCTCACATCATCACTATAACCAACAACAACATTGTATCATGTCGGAAGATCAACACCATTCGATGGATCAGACCACTTCATCGGACTACTTCTCTTTAAATATCGACAATGCTCAACATCTCCGTAGCTACTACACAAGTCATAGAGAAGAAGACATGAACCCTAATCTAAGTGATTACAGTAATTGCAACAAGAAAGACACAACAGTCTATAGAAGCTGTGGACACTCGTCAAAAGCTTCGGTGTCTAGAGGACATTGGAGACCAGCTGAAGATACTAAGCTCAAAGAACTAGTCGCCGTCTACGGTCCACAAAACTGGAACCTCATA…	MEMVHADVASLSITPCFPSSLSSSSHHHYNQQQHCIMSEDQHHSMDQTTSSDYFSLNIDNAQHLRSYYTSHREEDMNPNLSDYSNCNKKDTTVYRSCGHSSKASVSRGHWRPAEDTKLKELVAVYGPQNWNLIAEKLQGRSGKSCRLRWFNQLDPRINRRAFTEEEEERLMQAHRLYGNKWAMIARLFPGRTDNSVKNHWHVIMARKFREQSSSYRRRKTMVSLKPLINPNPHIFNDFDPTRLALTHLASSDHKQLMLPVPCFPGYDHENESPLMVDMFETQMMVGDYIAWTQEATTFDFLNQTGKSEIFERINEEKKPPFFDFLGLGTV
AtMYB106	AT3G01140	ATGCCAATCCATGTCAGAGACCGGGAAAAGGGGCGCTTACAGAACCTAAACAGAGACATCTTCTGTTGTGTTTCTCCATCTATATATCAGAGTGACGCCAAGAGAGCAGCTTTTGTGATCATACTGATCATGATCATATCGCCATGTTGTGATAAGGCCGGGTTGAAGAAAGGGCCTTGGACTCCAGAAGAGGATCAGAAACTTTTGGCTTATATTGAAGAACATGGCCATGGAAGCTGGCGTTCTTTGCCTGAGAAAGCCGGTCTCCAAAGGTGTGGAAAGAGTTGCAGACTCAGATGGACTAACTACCTAAGACCTGACATCAAGAGAGGCAAATTCACTGTACAAGAAGAACAAACCATCATTCAACTCCACGCTCTCCTCGGAAACAGGTGGTCA…	MPIHVRDREKGRLQNLNRDIFCCVSPSIYQSDAKRAAFVIILIMIISPCCDKAGLKKGPWTPEEDQKLLAYIEEHGHGSWRSLPEKAGLQRCGKSCRLRWTNYLRPDIKRGKFTVQEEQTIIQLHALLGNRWSAIATHLPKRTDNEIKNYWNTHLKKRLIKMGIDPVTHKHKNETLSSSTGQSKNAATLSHMAQWESARLEAEARLARESKLLHLQHYQNNNNLNKSAAPQQHCFTQKTSTNWTKPNQGNGDQQLESPTSTVTFSENLLMPLGIPTDSSRNRNNNNNESSAMIELAVSSSTSSDVSLVKEHEHDWIRQINCGSGGIGEGFTSLLIGDSVGRGLPTGKNEATAGVGNESEYNYYEDNKNYWNSILNLVDSSPSDSATMF
AtMYB107	AT3G02940	ATGGGGAGATCACCGTGTTGCGATGAGAGCGGATTAAAGAAAGGGCCATGGACGCCAGAAGAAGATCAGAAACTGATAAATCACATAAGAAAACACGGCCATGGAAGCTGGAGAGCTCTACCCAAGCAAGCCGGTTTAAACCGGTGTGGGAAGAGTTGCAGATTGAGATGGACTAATTACTTGAGACCAGATATCAAAAGAGGAAACTTCACAGCTGAGGAAGAACAAACTATCATTAACCTTCATTCTCTTCTTGGGAACAAGTGGTCGTCTATAGCTGGTCATCTCCCAGGAAGAACGGATAACGAAATAAAGAACTATTGGAACACGCATATTAGAAAGAAACTTATTCAGATGGGAATCGATCCGGTGACCCATAGGCCAAGAACCGACCATCTA…	MGRSPCCDESGLKKGPWTPEEDQKLINHIRKHGHGSWRALPKQAGLNRCGKSCRLRWTNYLRPDIKRGNFTAEEEQTIINLHSLLGNKWSSIAGHLPGRTDNEIKNYWNTHIRKKLIQMGIDPVTHRPRTDHLNVLAALPQLLAAANFNNLLNLNQNIQLDATSVAKAQLLHSMIQVLSNNNTSSSFDIHHTTNNLFGQSSFLENLPNIENPYDQTQGLSHIDDQPLDSFSSPIRVVAYQHDQNFIPPLISTSPDESKETQMMVKNKEIMKYNDHTSNPSSTSTFTQDHQPWCDIIDDEASDSYWKEIIEQTCSEPWPFRE
AtMYB108	AT3G06490	ATGGATGAAAAAGGAAGAAGCTTGAAGAACAACAACATGGAAGACGAGATGGACCTAAAGAGAGGTCCGTGGACTGCTGAAGAAGATTTTAAGCTCATGAATTACATTGCTACTAATGGAGAAGGTCGCTGGAACTCTCTTTCTCGTTGCGCCGGCCTCCAACGCACCGGTAAAAGCTGTAGACTAAGGTGGTTAAACTATCTCCGCCCTGACGTCCGCCGTGGAAACATTACACTTGAAGAACAACTCTTGATCCTCGAACTTCATTCCCGTTGGGGAAATAGATGGTCAAAAATCGCACAATATTTACCGGGAAGAACGGACAACGAGATCAAGAACTACTGGAGGACGCGGGTGCAAAAGCATGCGAAACAGTTGAAATGTGATGTGAATAGCCAA…	MDEKGRSLKNNNMEDEMDLKRGPWTAEEDFKLMNYIATNGEGRWNSLSRCAGLQRTGKSCRLRWLNYLRPDVRRGNITLEEQLLILELHSRWGNRWSKIAQYLPGRTDNEIKNYWRTRVQKHAKQLKCDVNSQQFKDTMKYLWMPRLVERIQSASASSAAAATTTTTTTTGSAGTSSCITTSNNQFMNYDYNNNNMGQQFGVMSNNDYITPENSSVAVSPASDLTEYYSAPNPNPEYYSGQMGNSYYPDQNLVSSQLLPDNYFDYSGLLDEDLTAMQEQSNLSWFENINGAASSSDSLWNIGETDEEFWFLQQQQQFNNNGSF
AtMYB109	AT3G55730	ATGGAAGGAGAAACTCATCAATCGGAGCCGTTACCTTTAGCATCTGGAGATTCCGATGAAGGGATCAGTGCTGCGATTGAGGCGGAGCTTGCTGAGTTAGCTGCTGGAGATTCAAGCGGCGGTGGTGGTTGCGGCGGCGGAGGAGGAGGGATTAGGAGTAAAGTCAAAGGACCTTGGTCTACGGAGGAAGACGCGGTTCTTACGAAGCTTGTGAGGAAACTAGGACCGAGGAATTGGAGTTTGATCGCTCGTGGAATCCCTGGTCGTTCTGGTAAATCTTGTCGATTGCGTTGGTGTAATCAGCTTGACCCTTGTCTCAAGCGTAAACCTTTCTCTGATGAGGAAGATCGTATGATAATTTCTGCTCACGCGGTTCACGGAAACAAATGGGCAGTGATT…	MEGETHQSEPLPLASGDSDEGISAAIEAELAELAAGDSSGGGGCGGGGGGIRSKVKGPWSTEEDAVLTKLVRKLGPRNWSLIARGIPGRSGKSCRLRWCNQLDPCLKRKPFSDEEDRMIISAHAVHGNKWAVIAKLLTGRTDNAIKNHWNSTLRRKYADLWNNGQWMANSVTTASVKNENVDETTNPPSSKQQLPQGDINSSPPKPPQVSDVVMEEAANEPQEPQEQQEQAPPVVSNVPTENNVFRPVARVGAFSIYNPTSQKNGYRDYNIVPCEGPLIQAAKPDSLAGKFLQSLCDEPQIPSKCGHGCSTLPAETKFSRNSVLGPEFVDYEEPSAVFNQELISIATDLNNIAWIKSGLDNAVVREAEQSLKMDNYNYNDPRIKFTGMMPRQDFFCARS
AtMYB11	AT3G62610	ATGGGAAGGGCGCCGTGCTGTGAGAAGGTAGGAATTAAGAAGGGGCGCTGGACGGCGGAGGAAGACCGGACTCTCTCCGACTACATTCAGTCCAACGGCGAAGGATCATGGCGTTCTCTTCCCAAAAATGCCGGGCTAAAGAGATGTGGAAAGAGCTGTAGATTGAGATGGATAAACTATTTGAGATCAGACATCAAGAGAGGAAACATAACTCCCGAAGAAGAGGACGTCATTGTTAAACTGCATTCCACTTTGGGAACCAGGTGGTCAACAATTGCGAGCAATCTACCGGGAAGAACAGACAACGAAATAAAAAACTATTGGAATTCTCATCTCAGCCGTAAACTCCACGGTTACTTCAGAAAACCAACTGTCGCCAATACCGTCGAGAATGCGCCT…	MGRAPCCEKVGIKKGRWTAEEDRTLSDYIQSNGEGSWRSLPKNAGLKRCGKSCRLRWINYLRSDIKRGNITPEEEDVIVKLHSTLGTRWSTIASNLPGRTDNEIKNYWNSHLSRKLHGYFRKPTVANTVENAPPPPKRRPGRTSRSAMKPKFILNPKNHKTPNSFKANKSDIVLPTTTIENGEGDKEDALMVLSSSSLSGAEEPGLGPCGYGDDGDCNPSINGDDGALCLNDDIFDSCFLLDDSHAVHVSSCESNNVKNSEPYGGMSVGHKNIETMADDFVDWDFVWREGQTLWDEKEDLDSVLSRLLDGEEMESEIRQRDSNDFGEPLDIDEENKMAAWLLS
AtMYB117	AT1G26780	ATGTTTATAACGGAAAAACAAGTGTGGATGGATGAGATCGTCGCAAGAAGAGCTTCTTCTTCTTGGGACTTCCCTTTCAACGACATTAATATTCATCAGCATCATCATCGTCACTGCAACACAAGTCATGAGTTTGAAATCTTGAAGAGTCCTCTTGGAGATGTAGCGGTTCACGAAGAAGAGAGTAATAATAATAACCCTAATTTCAGTAACAGCGAGAGTGGTAAGAAGGAGACAACAGATAGTGGTCAGTCTTGGTCCTCGTCGTCTTCAAAACCATCGGTCTTGGGGAGAGGACATTGGAGACCAGCTGAAGATGTTAAACTCAAAGAGCTTGTCTCCATTTACGGCCCACAAAACTGGAACCTCATAGCTGAAAAGCTTCAAGGAAGATCTGGG…	MFITEKQVWMDEIVARRASSSWDFPFNDINIHQHHHRHCNTSHEFEILKSPLGDVAVHEEESNNNNPNFSNSESGKKETTDSGQSWSSSSSKPSVLGRGHWRPAEDVKLKELVSIYGPQNWNLIAEKLQGRSGKSCRLRWFNQLDPRINRRAFTEEEEERLMQAHRLYGNKWAMIARLFPGRTDNSVKNHWHVVMARKYREHSSAYRRRKLMSNNPLKPHLTNNHHPNPNPNYHSFISTNHYFAQPFPEFNLTHHLVNNAPITSDHNQLVLPFHCFQGSL
AtMYB20	AT1G66230	ATGGGGAGACAACCATGCTGTGACAAAGTAGGGTTGAAGAAAGGACCATGGACTGCAGAAGAGGATAGGAAGCTCATAAACTTCATCCTTACCAATGGACAATGTTGTTGGAGAGCTGTTCCTAAGCTTTCTGGTCTTCTTAGGTGTGGCAAGAGTTGCAGACTTCGTTGGACTAACTATCTTAGACCAGACCTTAAGAGAGGTCTTCTCTCTGATTACGAAGAGAAGATGGTCATTGATCTCCATTCCCAGCTTGGAAACAGGTGGTCAAAGATAGCTTCTCATTTACCAGGAAGAACAGACAACGAAATCAAGAATCATTGGAACACTCACATCAAGAAGAAGTTGAGGAAAATGGGGATTGATCCTCTTACACATAAACCACTCTCTATCGTCGAA…	MGRQPCCDKVGLKKGPWTAEEDRKLINFILTNGQCCWRAVPKLSGLLRCGKSCRLRWTNYLRPDLKRGLLSDYEEKMVIDLHSQLGNRWSKIASHLPGRTDNEIKNHWNTHIKKKLRKMGIDPLTHKPLSIVEKEDEEPLKKLQNNTVPFQETMERPLENNIKNISRLEESLGDDQFMEINLEYGVEDVPLIETESLDLICSNSTMSSSTSTSSHSSNDSSFLKDLQFPEFEWSDYGNSNNDNNNGVDNIIENNMMSLWEISDFSSLDLLLNDESSSTFGLF
AtMYB43	AT5G16600	ATGGGGAGGCAACCATGTTGTGACAAAGTAGGGTTAAAGAAAGGGCCATGGACTATTGAAGAAGACAAGAAGCTCATCAACTTCATCCTCACCAATGGCCATTGCTGTTGGAGAGCTCTTCCCAAGCTTTCTGGACTATTGCGGTGTGGTAAAAGCTGCAGATTAAGATGGATAAATTATTTAAGACCTGATTTAAAAAGAGGTCTTTTATCAGAATATGAAGAACAAAAGGTCATTAATCTCCATGCGCAACTTGGCAATAGATGGTCAAAGATTGCCTCTCATCTACCAGGAAGAACTGATAATGAAATAAAGAACCATTGGAACACACACATAAAGAAAAAGCTAAGGAAAATGGGTATTGACCCTTTGACCCATAAGCCTCTCTCTGAACAAGAA…	MGRQPCCDKVGLKKGPWTIEEDKKLINFILTNGHCCWRALPKLSGLLRCGKSCRLRWINYLRPDLKRGLLSEYEEQKVINLHAQLGNRWSKIASHLPGRTDNEIKNHWNTHIKKKLRKMGIDPLTHKPLSEQEASQQAQGRKKSLVPHDDKNPKQDQQTKDEQEQHQLEQALEKNNTSVSGDGFCIDEVPLLNPHEILIDISSSHHHHSNDDNVNINTSKFTSPSSSSSSTSSCISSVVPGDEFSKFFDEMEILDLKWLSSDDSLGDDISKDGKFNNSTVDTMNLWDINDLSSLDMFMNEHDDGFIGNGNGCSRMVLDQDSWTFDLL
AtMYB44	AT5G67300	ATGGCTGATAGGATCAAAGGTCCATGGAGTCCTGAAGAAGACGAGCAGCTTCGTAGGCTTGTTGTTAAATACGGTCCAAGAAACTGGACAGTGATTAGCAAATCTATTCCCGGTAGATCGGGGAAATCGTGTCGTTTACGGTGGTGCAACCAGCTTTCGCCGCAAGTTGAGCATCGGCCGTTTTCGGCTGAGGAAGACGAGACGATCGCACGTGCTCACGCTCAGTTCGGTAATAAATGGGCGACGATTGCTCGTCTTCTCAACGGTCGTACGGACAACGCCGTGAAGAATCACTGGAACTCGACGCTCAAGAGGAAATGCGGCGGTTACGACCATCGGGGTTACGATGGTTCGGAGGATCATCGGCCGGTTAAGAGATCGGTGAGTGCGGGATCTCCA…	MADRIKGPWSPEEDEQLRRLVVKYGPRNWTVISKSIPGRSGKSCRLRWCNQLSPQVEHRPFSAEEDETIARAHAQFGNKWATIARLLNGRTDNAVKNHWNSTLKRKCGGYDHRGYDGSEDHRPVKRSVSAGSPPVVTGLYMSPGSPTGSDVSDSSTIPILPSVELFKPVPRPGAVVLPLPIETSSSSDDPPTSLSLSLPGADVSEESNRSHESTNINNTTSSRHNHNNTVSFMPFSGGFRGAIEEMGKSFPGNGGEFMAVVQEMIKAEVRSYMTEMQRNNGGGFVGGFIDNGMIPMSQIGVGRIE
AtMYB50	AT1G57560	ATGAAGAGACATTCTTGTTGTTACAAACAAAAGCTGAGAAAAGGTCTTTGGTCTCCTGAAGAAGATGAGAAACTTCTCAATTACATTACCAAACATGGCCATGGTTGCTGGAGTTCTGTCCCTAAACTCGCAGGTCTCGAGAGATGTGGAAAGAGCTGTAGACTCAGATGGATCAATTACTTAAGACCTGATTTAAAGAGAGGAGCTTTCTCTTCAGAGGAACAGAATCTCATTGTCGAGCTTCATGCTGTTCTTGGAAACAGATGGTCGCAAATTGCTGCGAGGCTTCCCGGGAGAACCGACAACGAGATAAAGAACTTGTGGAATTCGTGCATTAAGAAGAAGCTGATGAAGAAAGGCATTGACCCTATTACACATAAACCCCTCTCCGAGGTTGGT…	MKRHSCCYKQKLRKGLWSPEEDEKLLNYITKHGHGCWSSVPKLAGLERCGKSCRLRWINYLRPDLKRGAFSSEEQNLIVELHAVLGNRWSQIAARLPGRTDNEIKNLWNSCIKKKLMKKGIDPITHKPLSEVGKETNRSDNNNSTSFSSETNQDLFVKKTSDFAEYSAFQKEESNSVSLRNSLSSMIPTQFNIDDGSVSNAGFDTQVCVKPSIILLPPPNNTSSTVSGQDHVNVSEPNWESNSGTTSHLNNPGMEEMKWSEEYLNESLFSTQVYVKSETDFNSNIAFPWSQSQACDVFPKDLQRMAFSFGGQTL
AtMYB51	AT1G18570	ATGGTGCGGACACCGTGTTGCAAAGCTGAACTAGGGTTAAAGAAAGGAGCTTGGACTCCCGAGGAAGATCAGAAGCTTCTCTCTTACCTTAACCGCCACGGTGAAGGTGGATGGCGAACTCTCCCCGAAAAAGCTGGACTCAAGAGATGCGGCAAAAGCTGCAGACTGAGATGGGCCAATTATCTTAGACCTGACATCAAAAGAGGAGAGTTCACTGAAGACGAAGAACGTTCAATCATCTCTCTTCACGCCCTTCACGGCAACAAATGGTCTGCTATAGCTCGTGGACTACCAGGAAGAACCGATAACGAGATCAAGAACTACTGGAACACTCATATCAAAAAACGTTTGATCAAGAAAGGTATTGATCCAGTTACACACAAGGGCATAACCTCCGGT…	MVRTPCCKAELGLKKGAWTPEEDQKLLSYLNRHGEGGWRTLPEKAGLKRCGKSCRLRWANYLRPDIKRGEFTEDEERSIISLHALHGNKWSAIARGLPGRTDNEIKNYWNTHIKKRLIKKGIDPVTHKGITSGTDKSENLPEKQNVNLTTSDHDLDNDKAKKNNKNFGLSSASFLNKVANRFGKRINQSVLSEIIGSGGPLASTSHTTNTTTTSVSVDSESVKSTSSSFAPTSNLLCHGTVATTPVSSNFDVDGNVNLTCSSSTFSDSSVNNPLMYCDNFVGNNNVDDEDTIGFSTFLNDEDFMMLEESCVENTAFMKELTRFLHEDENDVVDVTPVYERQDLFDEIDNYFG
AtMYB52	AT1G17950	ATGATGTGTAGTCGAGGCCATTGGAGACCTGCAGAAGACGAGAAGCTAAGAGAACTCGTCGAACAATTTGGTCCTCATAATTGGAACGCCATAGCTCAGAAGCTCTCTGGTCGATCTGGTAAGAGTTGTAGATTGAGATGGTTTAATCAATTGGATCCTAGGATTAACCGAAACCCTTTCACGGAGGAAGAAGAAGAAAGGCTTTTAGCGTCTCATCGGATCCATGGGAACAGATGGTCTGTGATCGCTAGATTTTTTCCCGGTCGAACTGATAACGCTGTTAAAAACCATTGGCACGTCATCATGGCTCGTCGTGGCCGAGAACGGTCCAAGCTCCGTCCACGAGGCCTTGGCCATGATGGCACGGTGGCTGCGACTGGGATGATTGGTAATTATAAA…	MMCSRGHWRPAEDEKLRELVEQFGPHNWNAIAQKLSGRSGKSCRLRWFNQLDPRINRNPFTEEEEERLLASHRIHGNRWSVIARFFPGRTDNAVKNHWHVIMARRGRERSKLRPRGLGHDGTVAATGMIGNYKDCDKERRLATTTAINFPYQFSHINHFQVLKEFLTGKIGFRNSTTPIQEGAIDQTKRPMEFYNFLQVNTDSKIHELIDNSRKDEEEDVDQNNRIPNENCVPFFDFLSVGNSASQGLC
AtMYB53	AT5G65230	ATGGGAAGATCTCCTAGCTCAGATGAAACTGGTCTGAAGAAAGGTCCATGGTTGCCTGAAGAAGATGATAAACTGATCAATTATATTCACAAACATGGCCATAGCAGCTGGAGTGCCCTTCCCAAGCTCGCTGGTCTTAACAGGTGTGGGAAGAGTTGCAGGCTACGATGGACAAACTATTTGAGACCAGACATTAAGCGAGGAAAATTCTCTGCGGAGGAAGAAGAGACCATCCTGAACCTTCATGCGGTTCTAGGCAACAAGTGGTCAATGATTGCAAGCCACTTACCTGGACGAACTGACAATGAGATCAAGAATTTCTGGAATACTCATTTGAAGAAAAAGCTGATTCAGATGGGTTTTGACCCCATGACCCATCAGCCAAGAACCGATGATATC…	MGRSPSSDETGLKKGPWLPEEDDKLINYIHKHGHSSWSALPKLAGLNRCGKSCRLRWTNYLRPDIKRGKFSAEEEETILNLHAVLGNKWSMIASHLPGRTDNEIKNFWNTHLKKKLIQMGFDPMTHQPRTDDIFSSLSQLMSLSNLRGLVDLQQQFPMEDQALLNLQTEMAKLQLFQYLLQPSPAPMSINNINPNILNLLIKENSVTSNIDLGFLSSHLQDFNNNNLPSLKTLDDNHFSQNTSPIWLHEPPSLNQTMLPTHDPCAQSVDGFGSNQASSSHDQEVAVTDSVDWPDHHLFDDSMFPDISYQS
AtMYB54	AT1G73410	ATGATCATGTGCAGCCGAGGCCATTGGAGACCAGCTGAAGACGAGAAGCTCAAGGATCTTGTCGAACAATACGGTCCTCACAATTGGAACGCCATTGCTCTCAAGCTTCCTGGTCGCTCTGGTAAGAGTTGTAGATTGAGATGGTTTAATCAATTGGATCCAAGGATCAACCGAAACCCTTTCACGGAAGAAGAAGAAGAAAGACTTTTAGCGGCTCATCGGATCCATGGGAACAGATGGTCCATCATCGCAAGGCTTTTCCCTGGAAGAACTGATAACGCCGTCAAGAACCATTGGCACGTCATCATGGCTCGTCGCACACGCCAAACCTCTAAGCCTCGTCTTCTTCCCTCGACGACTTCGTCTTCTTCTTTAATGGCGAGTGAACAAATCATGATG…	MIMCSRGHWRPAEDEKLKDLVEQYGPHNWNAIALKLPGRSGKSCRLRWFNQLDPRINRNPFTEEEEERLLAAHRIHGNRWSIIARLFPGRTDNAVKNHWHVIMARRTRQTSKPRLLPSTTSSSSLMASEQIMMSSGGYNHNYSSDDRKKIFPADFINFPYKFSHINHLHFLKEFFTGKIALNHKANQSKKPMEFYNFLQVNTDSNKSEIIDQDSGQSKRSDSDTKHESHVPFFDFLSVGNSAS
AtMYB55	AT4G01680	ATGGGAAGACATTCATGTTGTTACAAACAGAAACTGAGGAAAGGACTTTGGTCTCCTGAAGAAGATGAGAAGCTTCTTCGTTACATCACTAAGTATGGTCATGGTTGCTGGAGCTCTGTCCCTAAACAAGCTGGTACGTTTTTATTTATCCAAATTCATCTTTTGTTTGGTTTACAGAGATGTGGAAAAAGTTGTAGATTAAGATGGATAAATTATTTAAGACCAGATTTGAAGAGAGGAGCATTTTCTCAAGATGAAGAAAATCTCATTATTGAACTTCATGCCGTTCTTGGCAATAGATGGTCTCAGATAGCTGCACAGCTTCCTGGAAGAACCGACAATGAAATCAAGAATCTTTGGAATTCTTGTTTGAAGAAGAAATTGAGGCTGAGAGGAATT…	MGRHSCCYKQKLRKGLWSPEEDEKLLRYITKYGHGCWSSVPKQAGLQRCGKSCRLRWINYLRPDLKRGAFSQDEENLIIELHAVLGNRWSQIAAQLPGRTDNEIKNLWNSCLKKKLRLRGIDPVTHKLLTEIETGTDDKTKPVEKSQQTYLVETDGSSSTTTCSTNQNNNTDHLYTGNFGFQRLSLENGSRIAAGSDLGIWIPQTGRNHHHHVDETIPSAVVLPGSMFSSGLTGYRSSNLGLIELENSFSTGPMMTEHQQIQESNYNNSTFFGNGNLNWGLTMEENQNPFTISNHSNSSLYSDIKSETNFFGTEATNVGMWPCNQLQPQQHAYGHI
AtMYB57	AT3G01530	ATGGAGACGACGATGAAGAAGAAAGGGAGAGTGAAAGCGACAATAACGTCACAGAAAGAAGAAGAAGGAACAGTGAGAAAAGGACCTTGGACTATGGAAGAAGATTTCATCCTCTTTAATTACATCCTTAATCATGGTGAAGGTCTTTGGAACTCTGTCGCCAAAGCCTCTGGTCTAAAACGTACTGGAAAAAGTTGTCGGCTCCGGTGGCTGAACTATCTCCGACCAGATGTGCGGCGAGGGAACATAACCGAAGAAGAACAGCTTTTGATCATTCAGCTTCATGCTAAGCTTGGAAACAGGTGGTCGAAGATTGCGAAGCATCTTCCGGGAAGAACGGACAACGAGATAAAGAACTTCTGGAGGACAAAGATTCAGAGACACATGAAAGTGTCATCG…	METTMKKKGRVKATITSQKEEEGTVRKGPWTMEEDFILFNYILNHGEGLWNSVAKASGLKRTGKSCRLRWLNYLRPDVRRGNITEEEQLLIIQLHAKLGNRWSKIAKHLPGRTDNEIKNFWRTKIQRHMKVSSENMMNHQHHCSGNSQSSGMTTQGSSGKAIDTAESFSQAKTTTFNVVEQQSNENYWNVEDLWPVHLLNGDHHVI
AtMYB63	AT1G79180	ATGGGGAAGGGAAGAGCACCTTGTTGTGACAAGACCAAAGTGAAGAGAGGTCCATGGAGCCCAGAAGAAGACATTAAACTCATCTCTTTCATTCAAAAGTTTGGTCATGAGAACTGGAGATCTCTCCCCAAACAATCTGGGCTATTGAGGTGTGGGAAGAGTTGTCGTCTAAGGTGGATTAACTATCTTAGGCCAGATCTGAAGCGTGGCAACTTCACTTCAGAGGAGGAAGAAACAATCATTAAGCTTCACCACAACTATGGGAACAAGTGGTCGAAAATCGCTTCTCAACTTCCAGGTAGAACAGATAACGAGATCAAGAATGTGTGGCACACTCATCTAAAGAAAAGACTGGCTCAGAGCTCAGGAACTGCAGATGAACCGGCCTCGCCTTGTTCG…	MGKGRAPCCDKTKVKRGPWSPEEDIKLISFIQKFGHENWRSLPKQSGLLRCGKSCRLRWINYLRPDLKRGNFTSEEEETIIKLHHNYGNKWSKIASQLPGRTDNEIKNVWHTHLKKRLAQSSGTADEPASPCSSDSVSRGKDDKSSHVEDSLNRETNHRNELSTSMSSGGSNQQDDPKIDELRFEYIEEAYSEFNDIIIQEVDKPDLLEIPFDSDPDIWSFLDTSNSFQQSTANENSSGSRATTEEESDEDEVKKWFKHLESELGLEEDDNQQQYKEEESSSSSLLKNYELMIH
AtMYB82	AT5G52600	ATGGAATGCAAAAGAGAAGAAGGGAAGTCTTACGTGAAGAGAGGGTTGTGGAAACCAGAAGAAGATATGATATTAAAAAGCTATGTTGAGACTCATGGTGAAGGAAACTGGGCAGACATTTCTCGTAGATCCGGGTTGAAGAGAGGAGGAAAAAGCTGTAGGCTGAGATGGAAGAACTATCTAAGACCAAATATCAAAAGAGGAAGCATGTCACCACAAGAACAAGACCTTATCATCCGCATGCATAAGCTTCTTGGAAACAGATGGTCGTTGATCGCTGGTCGCCTTCCAGGTCGTACTGACAATGAAGTGAAGAACTACTGGAATACTCATTTGAACAAGAAACCTAATTCCCGAAGACAGAATGCACCTGAATCAATCGTCGGCGCCACTCCTTTC…	MECKREEGKSYVKRGLWKPEEDMILKSYVETHGEGNWADISRRSGLKRGGKSCRLRWKNYLRPNIKRGSMSPQEQDLIIRMHKLLGNRWSLIAGRLPGRTDNEVKNYWNTHLNKKPNSRRQNAPESIVGATPFTDKPVMSTELRRSHGEGGEEESNTWMEETNHFGYDVHVGSPLPLISHYPDNTLVFDPCFSFTDFFPLL
AtMYB89	AT5G39700	ATGTATCTGTTTATGTATAAATGTAACATAGTTTTGGAGGAGACTCATGTTTTTCAAAATACCCCTTGTGATGTTTCATTGCAGAGGCCATTTAATGGGTTTGGAGAAAACAATGCATTACCATTGAGAAAGATGCATCAAGAGGAGAAGAAGAAGAAACATAGGGGTGGACACTGGACACTTTCAGAGGATCTCAAACTCAAAGAGCTTGTGGCGGTTTTTGGTCCTCAGAACTGGAAATTCATTGGAGAGAAGATGGAACCAAGAACAAGTCTAAGTTGTAGACAAAGGTGGTTTAACCAGCTCGATCCGAAGATTAACAAAAGAAATTTCACTGATGAGGAAGAAGAGAAGCTGCTTAGAGCTCACATATTATATGGTAACAAATGGTCTAAGATC…	MYLFMYKCNIVLEETHVFQNTPCDVSLQRPFNGFGENNALPLRKMHQEEKKKKHRGGHWTLSEDLKLKELVAVFGPQNWKFIGEKMEPRTSLSCRQRWFNQLDPKINKRNFTDEEEEKLLRAHILYGNKWSKIAKLFNRRTDHAVKNHWHSLMNRIIRKQSASDIRSFDNIQNYQTSNFLPGLCLLNTKQ
