# Supplementary material for: An R2R3-MYB Transcription Factor RmMYB108 Responds to Chilling Stress of Rosa multiflora and Conferred Cold Tolerance of Arabidopsis
Source: Front Plant Sci. 2021 Jul 27;12:696919. doi: 10.3389/fpls.2021.696919 (PMC8353178; doi:10.3389/fpls.2021.696919)
Supplement: Supplementary Table 6 — The prediction of sequence and cis-acting elements from PlantCARE of AtICE1 promoter. [file Table_6.XLSX]

## Sheet: Sequence
Sequence: Chromosome: 3 NC_003074.8[9832000..9837000](-)
ATTCACCAAATTGCTACCAAATGAAGGATATATCGACTACTTGGAAATAAGTTTTCCTTGCACACTAACCATTACCATTTAATTTGATGGAGTTAAAAATAAGCTTTAAGTTGTTCATATTCATCTTTAAAAAATTTCTAATGAGTAAGTTTATTTTGTTCAAGCCATGCTGGATTTATTGAAAACAAAGAGACTATTTTCATATATTTGCAAAGAAACAATATATTGAAACTGGTGAAATAGATACGTCATCCATTTCATCAAAGATCAATCTTCAAGATTCCTATGTGTATTATAGTAGCTTTAAAATAAAGTAAAACTAATATTGAATTATAATTCTTGGGAAGTGTTTATTATTGAAAATCAAATCATGTATAGCTACAGTAAATAAAAAGAAGT…

## Sheet: PlantCARE
Site Name	Sequence	Position	Matrix score	Strand	Organism	Function
ABRE	ACGTG	1084	5	-	Arabidopsis thaliana
AE-box	AGAAACAA	213	8	+	Arabidopsis thaliana
as-1	TGACG	246	5	-	Arabidopsis thaliana	core promoter element around -30 of transcription start
as-1	TGACG	1800	5	+	Arabidopsis thaliana	core promoter element around -30 of transcription start
AT~TATA-box	TATATA	1154	6	-	Arabidopsis thaliana
AT~TATA-box	TATATA	1721	6	-	Arabidopsis thaliana
AT~TATA-box	TATATA	2082	6	-	Arabidopsis thaliana	short_function
CAAT-box	CCAAT	529	5	+	Arabidopsis thaliana	core promoter element around -30 of transcription start
CAAT-box	CCAAT	566	5	+	Arabidopsis thaliana	core promoter element around -30 of transcription start
CAAT-box	CCAAT	586	5	+	Arabidopsis thaliana	core promoter element around -30 of transcription start
CAAT-box	CCCAATTT	632	8	+	Arabidopsis thaliana	core promoter element around -30 of transcription start
CAAT-box	CCAAT	633	5	+	Arabidopsis thaliana	core promoter element around -30 of transcription start
CAAT-box	CCAAT	874	5	-	Arabidopsis thaliana	core promoter element around -30 of transcription start
CAAT-box	CCAAT	941	5	-	Arabidopsis thaliana	core promoter element around -30 of transcription start
CAAT-box	CCAAT	1169	5	+	Arabidopsis thaliana	core promoter element around -30 of transcription start
MYB	TAACCA	65	6	+	Arabidopsis thaliana	cis-acting regulatory element involved in zein metabolism regulation
MYB	TAACCA	876	6	-	Arabidopsis thaliana	cis-acting regulatory element involved in light responsiveness
MYB	CAACAG	1743	6	+	Arabidopsis thaliana
Myb	TAACTG	2136	6	-	Arabidopsis thaliana
MYB-like sequence	TAACCA	65	6	+	Arabidopsis thaliana	short_function
MYB-like sequence	TAACCA	876	6	-	Arabidopsis thaliana	short_function
MYC	CATTTG	17	6	-	Arabidopsis thaliana	part of a light responsive element
MYC	CATGTG	535	6	-	Arabidopsis thaliana
MYC	CAATTG	1190	6	-	Arabidopsis thaliana
TATA	TATAAAAT	892	8	-	Arabidopsis thaliana	short_function
TATA	TATAAAAT	1553	8	+	Arabidopsis thaliana	short_function
TATA-box	TATA	28	4	+	Arabidopsis thaliana	short_function
TATA-box	TATA	202	4	+	Arabidopsis thaliana	part of a light responsive element
TATA-box	TATA	221	4	+	Arabidopsis thaliana	part of a light responsive element
TATA-box	TATAA	292	5	-	Arabidopsis thaliana
TATA-box	TATA	293	4	+	Arabidopsis thaliana
TATA-box	TATAA	330	5	-	Arabidopsis thaliana
TATA-box	TATA	331	4	+	Arabidopsis thaliana	part of a light responsive element
TATA-box	TATA	373	4	+	Arabidopsis thaliana
TATA-box	TATA	422	4	+	Arabidopsis thaliana
TATA-box	TATAA	543	5	-	Arabidopsis thaliana
TATA-box	TATA	544	4	+	Arabidopsis thaliana
TATA-box	TATAA	654	5	-	Arabidopsis thaliana	cis-acting regulatory element involved in light responsiveness
TATA-box	TATA	655	4	+	Arabidopsis thaliana	cis-acting element involved in defense and stress responsiveness
TATA-box	TATAA	843	5	-	Arabidopsis thaliana
TATA-box	TATA	844	4	+	Arabidopsis thaliana	cis-acting regulatory element essential for the anaerobic induction
TATA-box	TATAA	895	5	-	Arabidopsis thaliana	part of a conserved DNA module involved in light responsiveness
TATA-box	TATA	896	4	+	Arabidopsis thaliana	part of a module for light response
TATA-box	TATA	983	4	+	Arabidopsis thaliana	cis-acting element involved in the abscisic acid responsiveness
TATA-box	ccTATAAAaa	1011	9	+	Arabidopsis thaliana
TATA-box	TATATA	1154	6	-	Arabidopsis thaliana
TATA-box	TATA	1156	4	-	Arabidopsis thaliana
TATA-box	TATA	1272	4	-	Arabidopsis thaliana
TATA-box	TATAA	1497	5	-	Arabidopsis thaliana
TATA-box	TATA	1498	4	-	Arabidopsis thaliana
TATA-box	TATA	1535	4	-	Arabidopsis thaliana
TATA-box	TATA	1553	4	-	Arabidopsis thaliana	core promoter element around -30 of transcription start
TATA-box	TATATA	1721	6	-	Arabidopsis thaliana	core promoter element around -30 of transcription start
TATA-box	TATA	1723	4	-	Arabidopsis thaliana	core promoter element around -30 of transcription start
TATA-box	TATATA	2082	6	-	Arabidopsis thaliana	core promoter element around -30 of transcription start
TATA-box	TATA	2084	4	-	Arabidopsis thaliana	core promoter element around -30 of transcription start
TCT-motif	TCTTAC	1546	6	-	Arabidopsis thaliana	part of a light responsive element
W box	TTGACC	575	6	+	Arabidopsis thaliana
W box	TTGACC	783	6	+	Arabidopsis thaliana
